# Supplementary material
Source: MDPI journal article supplement (https://www.mdpi.com/2673-8015/4/1/11)
Supplement: s1 [file s1]

| Molecule name                           | logK <sub>aw</sub><br>exp | logK <sub>aw</sub><br>calc | Deviation |
|-----------------------------------------|---------------------------|----------------------------|-----------|
| 1,1,3-Trimethylcyclopentane             | 1.81                      | 0.97                       | 0.84      |
| 1,3,5-Cycloheptatriene                  | -0.74                     | -0.97                      | 0.23      |
| 1,4-Cyclohexadiene                      | -0.51                     | -0.81                      | 0.30      |
| 1,4-Pentadiene                          | 0.68                      | 0.21                       | 0.47      |
| 1,5-Hexadiene                           | 0.74                      | 0.27                       | 0.47      |
| 1,6-Heptadiene                          | 0.86                      | 0.38                       | 0.48      |
| 1,6-Heptadiyne                          | -1.06                     | -0.88                      | -0.18     |
| 1,8-Nonadiyne                           | -0.87                     | -0.76                      | -0.11     |
| 1-Butene                                | 0.98                      | 0.16                       | 0.82      |
| 1-Butyne                                | -0.14                     | -0.47                      | 0.33      |
| 1-Decene                                | 1.60                      | 0.55                       | 1.05      |
| 1-Heptene                               | 1.22                      | 0.34                       | 0.88      |
| 1-Heptyne                               | 0.44                      | -0.26                      | 0.70      |
| 1-Hexene                                | 1.16                      | 0.28                       | 0.88      |
| 1-Hexyne                                | 0.19                      | -0.35                      | 0.54      |
| 1-Methyl-4-isopropylcyclohexene         | -0.07                     | -0.17                      | 0.10      |
| 1-Methylcyclohexene                     | 0.49                      | -0.56                      | 1.05      |
| 1-Nonene                                | 1.51                      | 0.46                       | 1.05      |
| 1-Nonyne                                | 0.77                      | -0.14                      | 0.91      |
| 1-Octyne                                | 0.52                      | -0.20                      | 0.72      |
| 1-Pentadecene                           | 2.25                      | 0.85                       | 1.40      |
| 1-Pentene                               | 1.22                      | 0.25                       | 0.97      |
| 1-Pentyne                               | -0.12                     | -0.41                      | 0.29      |
| 1-trans-5-trans-9-cis-Cyclododecatriene | 0.36                      | -0.68                      | 1.04      |
| 2,2,3,3-Tetramethylbutane               | 1.99                      | 2.08                       | -0.09     |
| 2,2,3-Trimethylhexane                   | 2.34                      | 1.90                       | 0.44      |
| 2,2,3-Trimethylpentane                  | 1.92                      | 1.75                       | 0.17      |
| 2,2,5,5-Tetramethyl-3-hexyne            | 1.08                      | 0.51                       | 0.57      |
| 2,2,5-Trimethyl-3-hexyne                | 0.87                      | 0.11                       | 0.75      |
| 2,2,5-Trimethylhexane                   | 2.33                      | 1.90                       | 0.43      |
| 2,2,6,6-Tetramethylheptane              | 2.63                      | 2.50                       | 0.13      |
| 2,2-Dimethyl-3-hexyne                   | 0.45                      | -0.08                      | 0.53      |
| 2,2-Dimethylheptane                     | 2.32                      | 1.76                       | 0.56      |
| 2,2-Dimethylhexane                      | 2.22                      | 1.61                       | 0.61      |
| 2,2-Dimethyloctane                      | 2.42                      | 1.91                       | 0.51      |
| 2,2-Dimethylpentane                     | 2.11                      | 1.46                       | 0.65      |
| 2,2-Dimethylpropane                     | 1.83                      | 1.14                       | 0.69      |
| 2,3,4-Trimethylhexane                   | 2.36                      | 1.71                       | 0.65      |
| 2,3,4-Trimethylpentane                  | 1.88                      | 1.56                       | 0.32      |
| 2,3-Dimethyl-1,3-butadiene              | 0.29                      | 0.36                       | -0.07     |

|                            |       |       |      |
|----------------------------|-------|-------|------|
| 2,3-Dimethylbutane         | 1.70  | 1.09  | 0.61 |
| 2,3-Dimethylheptane        | 2.34  | 1.57  | 0.77 |
| 2,3-Dimethylpentane        | 1.85  | 1.27  | 0.58 |
| 2,4,6-Trimethyloctane      | 2.60  | 2.01  | 0.59 |
| 2,4-Dimethylheptane        | 2.29  | 1.57  | 0.72 |
| 2,4-Dimethylhexane         | 2.16  | 1.42  | 0.74 |
| 2,4-Dimethylpentane        | 1.99  | 1.27  | 0.72 |
| 2,5-Dimethyl-2,4-hexadiene | 0.28  | 0.06  | 0.22 |
| 2,5-Dimethylheptane        | 2.30  | 1.57  | 0.73 |
| 2,5-Dimethylhexane         | 2.17  | 1.42  | 0.75 |
| 2,6-Dimethylheptane        | 2.32  | 1.57  | 0.75 |
| 2,7-Dimethyloctane         | 2.53  | 1.72  | 0.81 |
| 2-Heptyne                  | 0.36  | -0.60 | 0.96 |
| 2-Methyl-1-pentene         | 1.08  | 0.33  | 0.75 |
| 2-Methyl-3-hexyne          | 0.27  | -0.46 | 0.73 |
| 2-Methylheptane            | 2.15  | 1.28  | 0.87 |
| 2-Methylhexane             | 2.11  | 1.13  | 0.98 |
| 2-Methylpentane            | 1.84  | 0.98  | 0.86 |
| 2-Methylpropane            | 1.65  | 0.66  | 0.99 |
| 3,3-Dimethylheptane        | 2.34  | 1.76  | 0.57 |
| 3,3-Dimethylpentane        | 1.88  | 1.46  | 0.42 |
| 3,4-Dimethylhexane         | 2.22  | 1.42  | 0.80 |
| 3,5-Dimethylheptane        | 2.29  | 1.57  | 0.72 |
| 3-Carene                   | 0.15  | -0.36 | 0.51 |
| 3-Ethylheptane             | 2.33  | 1.43  | 0.90 |
| 3-Ethylhexane              | 2.24  | 1.28  | 0.96 |
| 3-Hexyne                   | -0.13 | -0.66 | 0.53 |
| 3-Isopropylhexane          | 2.34  | 1.57  | 0.76 |
| 3-Methyl-1-butene          | 1.34  | 0.39  | 0.95 |
| 3-Methylheptane            | 2.12  | 1.28  | 0.84 |
| 3-Methylhexane             | 1.99  | 1.13  | 0.86 |
| 3-Methylnonane             | 2.39  | 1.58  | 0.81 |
| 3-Methylpentane            | 1.83  | 0.96  | 0.87 |
| 4,4-Diethylheptane         | 2.62  | 2.04  | 0.58 |
| 4,4-Dimethylheptane        | 2.34  | 1.76  | 0.58 |
| 4-Ethyl-2-methylhexane     | 2.30  | 1.57  | 0.73 |
| 4-Ethylheptane             | 2.31  | 1.43  | 0.88 |
| 4-Methyl-1-pentene         | 1.40  | 0.45  | 0.95 |
| 4-Methylheptane            | 2.18  | 1.28  | 0.90 |
| 4-Methylnonane             | 2.42  | 1.58  | 0.84 |
| 4-Methyloctane             | 2.61  | 1.43  | 1.18 |
| 4-Propyloctane             | 2.60  | 1.73  | 0.87 |

|                             |       |       |       |
|-----------------------------|-------|-------|-------|
| 4-Vinylcyclohexene          | 0.26  | -0.37 | 0.63  |
| 5-Ethylidene-2-norbornene   | -0.32 | -1.04 | 0.72  |
| alpha-Farnesene             | 0.08  | 0.31  | -0.23 |
| alpha-Humulene              | 0.14  | 0.03  | 0.11  |
| alpha-Neoclovene            | 0.14  | -0.12 | 0.26  |
| alpha-Phellandrene          | 0.35  | -0.26 | 0.61  |
| alpha-Pinene                | 0.74  | -0.43 | 1.17  |
| alpha-Terpinene             | -0.15 | -0.45 | 0.30  |
| beta-Phellandrene           | 0.35  | -0.07 | 0.42  |
| Butane                      | 1.53  | 0.53  | 1.00  |
| Camphene                    | 0.23  | -0.25 | 0.48  |
| Caprylene                   | 1.40  | 0.40  | 1.00  |
| Cedrene                     | 0.15  | -0.22 | 0.37  |
| cis- Cyclooctene            | 0.29  | -0.56 | 0.85  |
| cis-1,2-Dimethylcyclohexane | 1.17  | 0.62  | 0.55  |
| cis-2-Butene                | 0.98  | -0.02 | 1.00  |
| cis-2-Hexene                | 1.01  | 0.10  | 0.91  |
| cis-2-Octene                | 1.54  | 0.22  | 1.32  |
| cis-2-Pentene               | 0.96  | 0.04  | 0.92  |
| Cyclogeraniolane            | 1.64  | 1.10  | 0.53  |
| Cycloheptane                | 0.65  | 0.11  | 0.54  |
| Cycloheptene                | 0.28  | -0.60 | 0.88  |
| Cyclohexane                 | 0.88  | -0.01 | 0.89  |
| Cyclohexene                 | 0.07  | -0.68 | 0.75  |
| Cyclooctane                 | 0.74  | 0.23  | 0.51  |
| Cyclopentadiene             | -0.07 | -0.84 | 0.77  |
| Cyclopentane                | 0.84  | -0.13 | 0.97  |
| Cyclopentene                | 0.25  | -0.68 | 0.93  |
| Cyclopropane                | 0.53  | -0.37 | 0.90  |
| Decane                      | 2.32  | 1.43  | 0.89  |
| Diacetylene                 | -0.66 | -1.06 | 0.40  |
| Diisobutylene               | 2.00  | 0.91  | 1.09  |
| Dodecane                    | 2.53  | 1.73  | 0.80  |
| E-beta-Caryophyllene        | 0.04  | -0.06 | 0.10  |
| Ethane                      | 1.33  | 0.23  | 1.10  |
| Ethene                      | 0.83  | 0.25  | 0.58  |
| Ethylcyclohexane            | 1.30  | 0.48  | 0.82  |
| Ethyne                      | -0.01 | -0.22 | 0.21  |
| exo-Dicyclopentadiene       | -0.36 | -1.46 | 1.10  |
| gamma-Terpinene             | 0.02  | -0.36 | 0.38  |
| Heptane                     | 1.96  | 0.98  | 0.98  |
| Heptylcyclohexane           | 1.82  | 1.23  | 0.59  |

|                               |       |       |      |
|-------------------------------|-------|-------|------|
| Hexane                        | 1.85  | 0.83  | 1.02 |
| Isobutene                     | 0.85  | 0.17  | 0.68 |
| Isooctane                     | 2.12  | 1.75  | 0.37 |
| Isopentane                    | 1.70  | 0.83  | 0.87 |
| Isopentene                    | 1.25  | 0.27  | 0.98 |
| Isoprene                      | 0.49  | 0.22  | 0.27 |
| Isosativene                   | 0.01  | -0.33 | 0.34 |
| Longipinene                   | 0.08  | -0.33 | 0.41 |
| Methylcyclohexane             | 1.19  | 0.27  | 0.92 |
| Methylcyclopentane            | 1.13  | 0.15  | 0.98 |
| Myrcene                       | 0.42  | 0.40  | 0.02 |
| Neohexane                     | 1.85  | 1.29  | 0.56 |
| Nonane                        | 2.24  | 1.28  | 0.96 |
| Nopinene                      | 0.28  | -0.25 | 0.53 |
| Octane                        | 2.07  | 1.13  | 0.94 |
| Octylcyclohexane              | 2.02  | 1.38  | 0.64 |
| Pentadecane                   | 2.99  | 2.18  | 0.81 |
| Pentane                       | 1.75  | 0.68  | 1.07 |
| Pentylcyclopentane            | 1.87  | 0.80  | 1.07 |
| p-Menthane                    | 1.86  | 1.06  | 0.80 |
| Propane                       | 1.43  | 0.38  | 1.05 |
| Propylcyclohexane             | 1.62  | 0.63  | 0.99 |
| Propylcyclopentane            | 1.56  | 0.50  | 1.06 |
| Propylene                     | 0.86  | 0.10  | 0.76 |
| Propyne                       | -0.27 | -0.53 | 0.26 |
| Sabinene                      | 0.42  | -0.15 | 0.57 |
| s-trans-1,3-Butadiene         | 0.41  | 0.15  | 0.26 |
| Terpinolene                   | 0.03  | -0.50 | 0.53 |
| Tetradecane                   | 2.56  | 2.03  | 0.53 |
| trans-1,2-Dimethylcyclohexane | 1.39  | 0.62  | 0.77 |
| trans-1,3-Dimethylcyclohexane | 1.52  | 0.62  | 0.90 |
| trans-1,4-Dimethylcyclohexane | 1.55  | 0.62  | 0.93 |
| trans-2-Butene                | 0.96  | -0.05 | 1.01 |
| trans-2-Heptene               | 1.25  | 0.16  | 1.09 |
| trans-2-Hexene                | 1.02  | 0.10  | 0.92 |
| trans-2-Octene                | 1.57  | 0.22  | 1.35 |
| trans-2-Pentene               | 0.98  | 0.04  | 0.94 |
| trans-Decalin                 | 0.68  | 0.14  | 0.54 |
| Tricyclene                    | 0.92  | 0.56  | 0.36 |
| Tridecane                     | 2.07  | 1.88  | 0.19 |
| Trimethylethylene             | 0.98  | 0.06  | 0.92 |
| Triptane                      | 2.10  | 1.60  | 0.50 |

|                 |      |       |      |
|-----------------|------|-------|------|
| Undecane        | 2.53 | 1.58  | 0.95 |
| Valencene       | 0.10 | -0.06 | 0.16 |
| Vinylacetylene  | 0.00 | -0.43 | 0.43 |
| Z-Caryophyllene | 0.04 | -0.06 | 0.10 |
