# Supplementary material
Source: MDPI journal article supplement (https://www.mdpi.com/2673-8015/4/1/11)
Supplement: s1 [file s1]

| Molecule name                                                   | logKoa<br>exp | logKoa<br>calc | Diff  |
|-----------------------------------------------------------------|---------------|----------------|-------|
| (3-(2,3-Epoxypropoxy)propyl)trimethoxysilane                    | 5.8           | 6.4            | -0.60 |
| (Bromomethyl)benzene                                            | 4.65          | 4.85           | -0.20 |
| (Chloromethyl)benzene                                           | 3.74          | 4.51           | -0.77 |
| (E) 2-Ethylhexyl 4-methoxycinnamate                             | 9.7           | 8.88           | 0.82  |
| (Trichloromethyl)benzene                                        | 4.15          | 5.42           | -1.27 |
| (Z)-2-Ethylhexyl 4-methoxycinnamate                             | 9.08          | 8.88           | 0.20  |
| 1-(3-Methylphenyl)ethanone                                      | 5.6           | 5.22           | 0.38  |
| 1,1,1,2-Tetrachloroethane                                       | 3.89          | 3.79           | 0.10  |
| 1,1,1-Trifluoro-2-(2,2,2-trifluoroethoxy)ethane                 | 1.88          | 2.39           | -0.51 |
| 1,1,1-Trifluoro-2-propanol                                      | 3.62          | 3.53           | 0.09  |
| 1,1,1-Trifluoroacetone                                          | 3.51          | 2.41           | 1.10  |
| 1,1,2,2-Tetrachloroethane                                       | 4.26          | 3.82           | 0.44  |
| 1,1,2-Trichloroethane                                           | 3.54          | 3.35           | 0.19  |
| 1,10-Decyl dinitrate                                            | 8.75          | 8.14           | 0.61  |
| 1,16-Hexadecanolide                                             | 7.31          | 7.49           | -0.18 |
| 1,1-Dichloro-2-fluoroethane                                     | 1.87          | 1.87           | 0.00  |
| 1,1-Dichloroethane                                              | 2.41          | 2.57           | -0.16 |
| 1,1-Dichloropropane                                             | 2.81          | 3              | -0.19 |
| 1,1-Dichloropropene                                             | 2.51          | 2.87           | -0.36 |
| 1,1-Diethoxyethane                                              | 3.14          | 3.86           | -0.72 |
| 1,1-Difluoroethane                                              | 0.85          | 1.21           | -0.36 |
| 1,1'-Dimethyl-3,3',4,4'-tetrabromo-5,5'-dichloro-2,2'-bipyrrole | 13.04         | 12.6           | 0.44  |
| 1,1'-Dimethyl-3,3',4-tribromo-4',5,5'-trichloro-2,2'-bipyrrole  | 11.6          | 12.21          | -0.61 |
| 1,1'-Dimethyl-3,4,4'-tribromo-3',5,5'-trichloro-2,2'-bipyrrole  | 12.41         | 12.21          | 0.20  |
| 1,1-Dimethyl-3-phenylurea                                       | 7.85          | 8.54           | -0.69 |
| 1,2,3,4,5,6,7-Heptachloronaphthalene                            | 10.63         | 9.92           | 0.71  |
| 1,2,3,4,5,6,8-Heptachloronaphthalene                            | 10.68         | 9.92           | 0.76  |
| 1,2,3,4,5,6-Hexachloronaphthalene                               | 10.11         | 9.32           | 0.79  |
| 1,2,3,4,5,7-Hexachloronaphthalene                               | 9.8           | 9.32           | 0.48  |
| 1,2,3,4,5,8-Hexachloronaphthalene                               | 10.37         | 9.32           | 1.05  |
| 1,2,3,4,5-Pentabromo-6-ethylbenzene                             | 9.26          | 8.81           | 0.45  |
| 1,2,3,4,5-Pentachloronaphthalene                                | 9.28          | 8.72           | 0.56  |
| 1,2,3,4,6,7,8-Heptachlorodibenzofuran                           | 11.17         | 11.34          | -0.17 |
| 1,2,3,4,6,7,8-Heptachlorodibenzo-p-dioxin                       | 11.42         | 11.38          | 0.04  |
| 1,2,3,4,6,7-Hexachloronaphthalene                               | 9.69          | 9.32           | 0.37  |
| 1,2,3,4,6,8,9-Heptachlorodibenzofuran                           | 11.17         | 11.34          | -0.17 |
| 1,2,3,4,6,8-Hexachlorodibenzofuran                              | 10.44         | 10.74          | -0.30 |
| 1,2,3,4,6-Pentachloronaphthalene                                | 8.9           | 8.72           | 0.18  |
| 1,2,3,4,7,8,9-Heptachlorodibenzofuran                           | 11.43         | 11.34          | 0.09  |
| 1,2,3,4,7,8-Hexachlorodibenzofuran                              | 10.77         | 10.74          | 0.03  |

|                                        |       |       |       |
|----------------------------------------|-------|-------|-------|
| 1,2,3,4,7,8-Hexachlorodibenzo-p-dioxin | 11.11 | 10.78 | 0.33  |
| 1,2,3,4,7-Pentachlorodibenzofuran      | 10.12 | 10.14 | -0.02 |
| 1,2,3,4,7-Pentachlorodibenzo-p-dioxin  | 10.67 | 10.18 | 0.49  |
| 1,2,3,4,8,9-Hexachlorodibenzofuran     | 10.95 | 10.74 | 0.21  |
| 1,2,3,4-Tetrachlorobenzene             | 5.83  | 5.72  | 0.11  |
| 1,2,3,4-Tetrachlorodibenzofuran        | 9.47  | 9.54  | -0.07 |
| 1,2,3,4-Tetrachlorodibenzo-p-dioxin    | 9.7   | 9.58  | 0.12  |
| 1,2,3,4-Tetrachloronaphthalene         | 8.33  | 8.12  | 0.21  |
| 1,2,3,4-Tetrahydronaphthalene          | 4.65  | 5.37  | -0.72 |
| 1,2,3,5,6,7-Hexachloronaphthalene      | 9.69  | 9.32  | 0.37  |
| 1,2,3,5,6,8-Hexachloronaphthalene      | 9.8   | 9.32  | 0.48  |
| 1,2,3,5,7,8-Hexachloronaphthalene      | 9.82  | 9.32  | 0.50  |
| 1,2,3,5,7-Pentachloronaphthalene       | 8.72  | 8.72  | 0.00  |
| 1,2,3,5,8-Pentachloronaphthalene       | 9.1   | 8.72  | 0.38  |
| 1,2,3,5-Tetrachlorobenzene             | 5.78  | 5.72  | 0.06  |
| 1,2,3,5-Tetrachloronaphthalene         | 8.26  | 8.12  | 0.14  |
| 1,2,3,6,7,8-Hexachlorodibenzofuran     | 10.78 | 10.74 | 0.04  |
| 1,2,3,6,7,8-Hexachlorodibenzo-p-dioxin | 10.97 | 10.78 | 0.19  |
| 1,2,3,6,7-Pentachloronaphthalene       | 9.1   | 8.72  | 0.38  |
| 1,2,3,6,8-Pentachloronaphthalene       | 9.16  | 8.72  | 0.44  |
| 1,2,3,7,8,9-Hexachlorodibenzofuran     | 10.93 | 10.74 | 0.19  |
| 1,2,3,7,8,9-Hexachlorodibenzo-p-dioxin | 11.01 | 10.78 | 0.23  |
| 1,2,3,7,8-Pentachlorodibenzofuran      | 10.43 | 10.14 | 0.29  |
| 1,2,3,7,8-Pentachlorodibenzo-p-dioxin  | 10.57 | 10.18 | 0.39  |
| 1,2,3,7-Tetrachlorodibenzofuran        | 9.42  | 9.54  | -0.12 |
| 1,2,3,7-Tetrachlorodibenzo-p-dioxin    | 9.94  | 9.58  | 0.36  |
| 1,2,3,7-Tetrachloronaphthalene         | 8.35  | 8.12  | 0.23  |
| 1,2,3,8,9-Pentachlorodibenzofuran      | 10.48 | 10.14 | 0.34  |
| 1,2,3,8-Tetrachloronaphthalene         | 8.6   | 8.12  | 0.48  |
| 1,2,3-Propanetriol                     | 7.63  | 7.68  | -0.05 |
| 1,2,3-Trichlorobenzene                 | 5.16  | 5.12  | 0.04  |
| 1,2,3-Trichloronaphthalene             | 7.62  | 7.52  | 0.10  |
| 1,2,3-Trichloropropane                 | 4.15  | 4.09  | 0.06  |
| 1,2,4,5,6,8-Hexachloronaphthalene      | 9.69  | 9.32  | 0.37  |
| 1,2,4,5,6-Pentachloronaphthalene       | 9.15  | 8.72  | 0.43  |
| 1,2,4,5,7,8-Hexachloronaphthalene      | 9.89  | 9.32  | 0.57  |
| 1,2,4,5,7-Pentachloronaphthalene       | 8.86  | 8.72  | 0.14  |
| 1,2,4,5,8-Pentachloronaphthalene       | 9.18  | 8.72  | 0.46  |
| 1,2,4,5-Tetrachlorobenzene             | 5.8   | 5.72  | 0.08  |
| 1,2,4,5-Tetrachloronaphthalene         | 8.58  | 8.12  | 0.46  |
| 1,2,4,5-Tetramethylbenzene             | 5.08  | 4.66  | 0.42  |
| 1,2,4,6,7,8-Hexachlorodibenzofuran     | 10.5  | 10.74 | -0.24 |

|                                                   |       |       |       |
|---------------------------------------------------|-------|-------|-------|
| 1,2,4,6,7,9-Hexachlorodibenzo-p-dioxin            | 10.93 | 10.78 | 0.15  |
| 1,2,4,6,7-Pentachloronaphthalene                  | 8.73  | 8.72  | 0.01  |
| 1,2,4,6,8,9-Hexachlorodibenzofuran                | 10.55 | 10.74 | -0.19 |
| 1,2,4,6,8-Pentachloronaphthalene                  | 8.78  | 8.72  | 0.06  |
| 1,2,4,6-Tetrachloronaphthalene                    | 8.08  | 8.12  | -0.04 |
| 1,2,4,7,8-Pentachlorodibenzofuran                 | 9.96  | 10.14 | -0.18 |
| 1,2,4,7,8-Pentachlorodibenzo-p-dioxin             | 10.24 | 10.18 | 0.06  |
| 1,2,4,7,8-Pentachloronaphthalene                  | 9.06  | 8.72  | 0.34  |
| 1,2,4,7-Tetrachloronaphthalene                    | 8.13  | 8.12  | 0.01  |
| 1,2,4,8-Tetrachloronaphthalene                    | 8.41  | 8.12  | 0.29  |
| 1,2,4-Trichlorobenzene                            | 5.1   | 5.12  | -0.02 |
| 1,2,4-Trichlorodibenzo-p-dioxin                   | 8.97  | 8.98  | -0.01 |
| 1,2,4-Trichloronaphthalene                        | 7.27  | 7.52  | -0.25 |
| 1,2,4-Trimethylbenzene                            | 4.2   | 4.28  | -0.08 |
| 1,2,5,6-Tetrabromocyclooctane                     | 7.4   | 7.54  | -0.14 |
| 1,2,5,6-Tetrachloronaphthalene                    | 8.22  | 8.12  | 0.10  |
| 1,2,5,6-Tetramethylnaphthalene                    | 7.33  | 6.94  | 0.39  |
| 1,2,5,7-Tetrachloronaphthalene                    | 8.08  | 8.12  | -0.04 |
| 1,2,5,8-Tetrachloronaphthalene                    | 8.4   | 8.12  | 0.28  |
| 1,2,5-Trichloronaphthalene                        | 7.45  | 7.52  | -0.07 |
| 1,2,6,7-Tetrachloronaphthalene                    | 8.34  | 8.12  | 0.22  |
| 1,2,6-Trichloronaphthalene                        | 7.5   | 7.52  | -0.02 |
| 1,2,7,8-Tetrachlorodibenzofuran                   | 9.78  | 9.54  | 0.24  |
| 1,2,7,8-Tetrachlorodibenzo-p-dioxin               | 9.96  | 9.58  | 0.38  |
| 1,2,7,8-Tetrachloronaphthalene                    | 8.65  | 8.12  | 0.53  |
| 1,2,7-Trichloronaphthalene                        | 7.54  | 7.52  | 0.02  |
| 1,2,9,10-Tetrachlorodecane                        | 7.28  | 7.88  | -0.60 |
| 1,2-Benzenedicarboxylic acid, di-2-propenyl ester | 7.92  | 7.9   | 0.02  |
| 1,2-Butanediol                                    | 6.02  | 6.03  | -0.01 |
| 1,2-Butyl dinitrate                               | 5.01  | 5.31  | -0.30 |
| 1,2-Decyl dinitrate                               | 7.84  | 7.89  | -0.05 |
| 1,2-Dibromobenzene                                | 5.2   | 5.18  | 0.02  |
| 1,2-Dibromoethane                                 | 3.69  | 3.56  | 0.13  |
| 1,2-Dibutoxyethane                                | 5.22  | 5.14  | 0.08  |
| 1,2-Dichlorobenzene                               | 4.39  | 4.52  | -0.13 |
| 1,2-Dichloronaphthalene                           | 6.83  | 6.92  | -0.09 |
| 1,2-Dichloropropane                               | 2.96  | 3.31  | -0.35 |
| 1,2-Difluorobenzene                               | 2.86  | 2.96  | -0.10 |
| 1,2-Dihydroxybenzene                              | 7.69  | 8.02  | -0.33 |
| 1,2-Dimethylbenzene                               | 3.92  | 3.9   | 0.02  |
| 1,2-Dimethylnaphthalene                           | 6.31  | 6.18  | 0.13  |
| 1,2-Diphenylethane                                | 7.01  | 6.58  | 0.43  |

|                                              |       |      |       |
|----------------------------------------------|-------|------|-------|
| 1,2-Ethanediol                               | 5.34  | 5.42 | -0.08 |
| 1,2-Ethanediol dinitrate                     | 4.55  | 4.7  | -0.15 |
| 1,2-Hexyl dinitrate                          | 5.88  | 6.17 | -0.29 |
| 1,2-Octyl dinitrate                          | 6.83  | 7.03 | -0.20 |
| 1,2-Pentyl dinitrate                         | 5.42  | 5.74 | -0.32 |
| 1,2-Propanediol                              | 5.48  | 5.6  | -0.12 |
| 1,2-Propyl dinitrate                         | 4.64  | 4.88 | -0.24 |
| 1,3,5,7-Tetrachloronaphthalene               | 7.9   | 8.12 | -0.22 |
| 1,3,5,8-Tetrachloronaphthalene               | 8.26  | 8.12 | 0.14  |
| 1,3,5-Cycloheptatriene                       | 3.38  | 3.72 | -0.34 |
| 1,3,5-Tribromo-2-(2,3-dibromopropoxy)benzene | 8.77  | 9.36 | -0.59 |
| 1,3,5-Tribromo-2-prop-2-enoxybenzene         | 6.8   | 7.15 | -0.35 |
| 1,3,5-Tribromobenzene                        | 6.1   | 6.11 | -0.01 |
| 1,3,5-Trichlorobenzene                       | 4.91  | 5.12 | -0.21 |
| 1,3,5-Trichloronaphthalene                   | 7.32  | 7.52 | -0.20 |
| 1,3,5-Trichlorotrifluorobenzene              | 4.71  | 4.58 | 0.13  |
| 1,3,5-Trimethylbenzene                       | 4.18  | 4.28 | -0.10 |
| 1,3,5-Trinitrobenzene                        | 7.83  | 7.58 | 0.25  |
| 1,3,5-Trioxane                               | 2.55  | 2.63 | -0.08 |
| 1,3,6,8-Tetrachlorodibenzofuran              | 9.75  | 9.54 | 0.21  |
| 1,3,6,8-Tetrachlorodibenzo-p-dioxin          | 9.38  | 9.58 | -0.20 |
| 1,3,6,8-Tetrachloronaphthalene               | 8.22  | 8.12 | 0.10  |
| 1,3,7,8-Tetrachlorodibenzofuran              | 9.32  | 9.54 | -0.22 |
| 1,3,7,8-Tetrachlorodibenzo-p-dioxin          | 9.86  | 9.58 | 0.28  |
| 1,3,7,9-Tetrachlorodibenzofuran              | 9.82  | 9.54 | 0.28  |
| 1,3,7,9-Tetrachlorodibenzo-p-dioxin          | 9.93  | 9.58 | 0.35  |
| 1,3,7-Trichlorodibenzo-p-dioxin              | 9.63  | 8.98 | 0.65  |
| 1,3,7-Trimethylnaphthalene                   | 6.61  | 6.56 | 0.05  |
| 1,3-Butyl dinitrate                          | 5.21  | 5.31 | -0.10 |
| 1,3-Butyleneglycol                           | 6.01  | 6.03 | -0.02 |
| 1,3-Diaminobenzene                           | 6.64  | 7.44 | -0.80 |
| 1,3-Dibromobenzene                           | 5.1   | 5.18 | -0.08 |
| 1,3-Dibromopropane                           | 3.79  | 3.99 | -0.20 |
| 1,3-Dichloro-2-propanol                      | 4.31  | 5.08 | -0.77 |
| 1,3-Dichlorobenzene                          | 4.29  | 4.52 | -0.23 |
| 1,3-Dichlorofluoranthene                     | 10.11 | 10.7 | -0.59 |
| 1,3-Dichloropropane                          | 3.53  | 3.31 | 0.22  |
| 1,3-Diethylbenzene                           | 5.18  | 4.7  | 0.48  |
| 1,3-Difluorobenzene                          | 2.71  | 2.96 | -0.25 |
| 1,3-Dihydroxybenzene                         | 9.24  | 8.02 | 1.22  |
| 1,3-Dimethylbenzene                          | 3.81  | 3.9  | -0.09 |
| 1,3-Dimethylnaphthalene                      | 6.31  | 6.18 | 0.13  |

|                                |       |       |       |
|--------------------------------|-------|-------|-------|
| 1,3-Dinitrobenzene             | 6.28  | 6.16  | 0.12  |
| 1,3-Dioxolane                  | 2.41  | 2.57  | -0.16 |
| 1,3-Propanediol                | 5.59  | 5.85  | -0.26 |
| 1,4,5,8-Tetrachloronaphthalene | 8.45  | 8.12  | 0.33  |
| 1,4,5-Trichloronaphthalene     | 7.56  | 7.52  | 0.04  |
| 1,4,5-Trimethylnaphthalene     | 7.04  | 6.56  | 0.48  |
| 1,4,6,7-Tetrachloronaphthalene | 8.13  | 8.12  | 0.01  |
| 1,4,6,7-Tetramethylnaphthalene | 7.16  | 6.94  | 0.22  |
| 1,4,6-Trichloronaphthalene     | 7.27  | 7.52  | -0.25 |
| 1,4,6-Trimethylnaphthalene     | 6.66  | 6.56  | 0.10  |
| 1,4-Benzoquinone               | 4.68  | 4.98  | -0.30 |
| 1,4-Butyl dinitrate            | 5.66  | 5.56  | 0.10  |
| 1,4-Cyclohexadiene             | 2.71  | 3.5   | -0.79 |
| 1,4-Diaminoanthraquinone       | 10.85 | 10.36 | 0.49  |
| 1,4-Dibromobenzene             | 5.21  | 5.18  | 0.03  |
| 1,4-Dibromobutane              | 4.48  | 4.42  | 0.06  |
| 1,4-Dichlorobenzene            | 4.3   | 4.52  | -0.22 |
| 1,4-Dichloronaphthalene        | 6.92  | 6.92  | 0.00  |
| 1,4-Diethylbenzene             | 4.75  | 4.7   | 0.05  |
| 1,4-Difluorobenzene            | 2.93  | 2.96  | -0.03 |
| 1,4-Dihydroxybenzene           | 9.03  | 8.02  | 1.01  |
| 1,4-Dimethylbenzene            | 3.79  | 3.9   | -0.11 |
| 1,4-Dimethylnaphthalene        | 6.51  | 6.18  | 0.33  |
| 1,4-Dinitrobenzene             | 6.28  | 6.16  | 0.12  |
| 1,4-Dinitrobutane              | 4.61  | 4.88  | -0.27 |
| 1,4-Dioxane                    | 3.17  | 2.9   | 0.27  |
| 1,4-Pentadiene                 | 1.87  | 2.04  | -0.17 |
| 1,4-Pentyl dinitrate           | 5.8   | 5.74  | 0.06  |
| 1,5-Dichloronaphthalene        | 6.65  | 6.92  | -0.27 |
| 1,5-Dichloropentane            | 4.47  | 4.17  | 0.30  |
| 1,5-Dimethylnaphthalene        | 6.3   | 6.18  | 0.12  |
| 1,5-Hexadiene                  | 2.21  | 2.44  | -0.23 |
| 1,5-Hexyl dinitrate            | 6.04  | 6.17  | -0.13 |
| 1,5-Pentenediol                | 7.38  | 6.71  | 0.67  |
| 1,5-Pentyl dinitrate           | 6.02  | 5.99  | 0.03  |
| 1,6,7-Trichloronaphthalene     | 7.54  | 7.52  | 0.02  |
| 1,6-Dimethylnaphthalene        | 6.22  | 6.18  | 0.04  |
| 1,6-Hexanedioic acid           | 10.74 | 10.62 | 0.12  |
| 1,6-Hexyl dinitrate            | 6.69  | 6.42  | 0.27  |
| 1,7-Dimethylnaphthalene        | 6.49  | 6.18  | 0.31  |
| 1,7-Heptyl dinitrate           | 7.23  | 6.85  | 0.38  |
| 1,8-Cineole                    | 4.87  | 4.67  | 0.20  |

|                                                             |       |       |       |
|-------------------------------------------------------------|-------|-------|-------|
| 1,8-Dichlorooctane                                          | 5.92  | 5.46  | 0.46  |
| 1,8-Dimethylnaphthalene                                     | 6.56  | 6.18  | 0.38  |
| 1,8-Octyl dinitrate                                         | 7.71  | 7.28  | 0.43  |
| 12-Oxahehexadecanolide                                      | 7.74  | 7.25  | 0.49  |
| 1-Aminoanthraquinone                                        | 10.28 | 9.81  | 0.47  |
| 1-Bromo-3-chloropropane                                     | 3.72  | 3.65  | 0.07  |
| 1-Bromo-3-fluorobenzene                                     | 3.8   | 4.07  | -0.27 |
| 1-Bromo-4-chlorobenzene                                     | 4.81  | 4.85  | -0.04 |
| 1-Bromo-4-fluorobenzene                                     | 4.11  | 4.07  | 0.04  |
| 1-Bromobutane                                               | 3.08  | 3.3   | -0.22 |
| 1-Bromodecane                                               | 5.99  | 5.88  | 0.11  |
| 1-Bromonaphthalene                                          | 6.03  | 6.65  | -0.62 |
| 1-Bromooctane                                               | 4.72  | 5.02  | -0.30 |
| 1-Bromopentane                                              | 3.51  | 3.73  | -0.22 |
| 1-Bromopropane                                              | 2.53  | 2.87  | -0.34 |
| 1-Bromopyrene                                               | 10.1  | 10.83 | -0.73 |
| 1-Butanol                                                   | 4.1   | 4.2   | -0.10 |
| 1-Butene                                                    | 1.5   | 1.85  | -0.35 |
| 1-Butylamine                                                | 3.61  | 3.98  | -0.37 |
| 1-Butyne                                                    | 1.59  | 1.92  | -0.33 |
| 1-Chloro-1,1-difluoroethane                                 | 1.27  | 1.37  | -0.10 |
| 1-Chloro-2,4-dinitrobenzene                                 | 7.02  | 6.76  | 0.26  |
| 1-Chloro-2-[2,2,2-trichloro-1-(4-chlorophenyl)ethyl]benzene | 9.74  | 9.6   | 0.14  |
| 1-Chloro-2-[2,2-dichloro-1-(4-chlorophenyl)vinyl]benzene    | 9.26  | 9.28  | -0.02 |
| 1-Chloro-3-fluorobenzene                                    | 3.4   | 3.74  | -0.34 |
| 1-Chlorobutane                                              | 2.72  | 2.96  | -0.24 |
| 1-Chlorodibenzo-p-dioxin                                    | 7.86  | 7.78  | 0.08  |
| 1-Chloroheptane                                             | 4.07  | 4.25  | -0.18 |
| 1-Chlorohexane                                              | 3.76  | 3.82  | -0.06 |
| 1-Chloronaphthalene                                         | 5.81  | 6.32  | -0.51 |
| 1-Chlorooctane                                              | 4.55  | 4.68  | -0.13 |
| 1-Chloropentane                                             | 3.19  | 3.39  | -0.20 |
| 1-Chloropropane                                             | 2.24  | 2.53  | -0.29 |
| 1-Chloropyrene                                              | 9.71  | 10.5  | -0.79 |
| 1-Decene                                                    | 4.47  | 4.25  | 0.22  |
| 1-Dodecanol                                                 | 7.78  | 7.64  | 0.14  |
| 1-Ethoxy-butane                                             | 3.16  | 3.23  | -0.07 |
| 1-Ethyl naphthalene                                         | 6.2   | 6.2   | 0.00  |
| 1H-Benzotriazole                                            | 5.99  | 5.91  | 0.08  |
| 1-Heptanol                                                  | 5.51  | 5.49  | 0.02  |
| 1-Heptene                                                   | 2.93  | 3.05  | -0.12 |
| 1-Heptyne                                                   | 2.97  | 3.12  | -0.15 |

|                                                 |       |       |       |
|-------------------------------------------------|-------|-------|-------|
| 1-Hexadecanol                                   | 9.9   | 9.36  | 0.54  |
| 1-Hexanol                                       | 5.18  | 5.06  | 0.12  |
| 1-Hexene                                        | 2.41  | 2.65  | -0.24 |
| 1-Hexyne                                        | 2.58  | 2.72  | -0.14 |
| 1-Hydroxyanthraquinone                          | 9.87  | 10.1  | -0.23 |
| 1-Iodobutane                                    | 3.33  | 3.38  | -0.05 |
| 1-Iodoheptane                                   | 4.68  | 4.67  | 0.01  |
| 1-Iodopentane                                   | 3.81  | 3.81  | 0.00  |
| 1-Methyl-4-isopropyl-7-oxabicyclo[2.2.1]heptane | 5.06  | 4.78  | 0.28  |
| 1-Methyl-4-isopropylcyclohexene                 | 4.04  | 4.33  | -0.29 |
| 1-Methylfluorene                                | 7.75  | 7.52  | 0.23  |
| 1-Methylnaphthalene                             | 5.57  | 5.8   | -0.23 |
| 1-Methylphenanthrene                            | 7.89  | 8.08  | -0.19 |
| 1-Naphthaleneacetic acid                        | 9.33  | 9.75  | -0.42 |
| 1-Naphthylamine                                 | 7.42  | 7.78  | -0.36 |
| 1-Nitrobutane                                   | 3.67  | 3.53  | 0.14  |
| 1-Nitronaphthalene                              | 7.24  | 7.14  | 0.10  |
| 1-Nitrooxy-2-butanol                            | 5.83  | 5.64  | 0.19  |
| 1-Nitrooxy-2-propanol                           | 5.62  | 5.21  | 0.41  |
| 1-Nitropentane                                  | 4.03  | 3.96  | 0.07  |
| 1-Nitropropane                                  | 3.25  | 3.1   | 0.15  |
| 1-Nonanol                                       | 6.5   | 6.35  | 0.15  |
| 1-Nonene                                        | 3.83  | 3.85  | -0.02 |
| 1-Nonyne                                        | 3.93  | 3.92  | 0.01  |
| 1-Octadecanol                                   | 10.93 | 10.22 | 0.71  |
| 1-Octanol                                       | 6.03  | 5.92  | 0.11  |
| 1-Octen-3-ol                                    | 5.13  | 5.46  | -0.33 |
| 1-Octyne                                        | 3.53  | 3.52  | 0.01  |
| 1-Pentanol                                      | 4.69  | 4.63  | 0.06  |
| 1-Pentene                                       | 1.93  | 2.25  | -0.32 |
| 1-Pentyl nitrate                                | 3.03  | 4.3   | -1.27 |
| 1-Pentyne                                       | 2     | 2.32  | -0.32 |
| 1-Phenyl-1-propanone                            | 5.46  | 5.24  | 0.22  |
| 1-Propanol                                      | 3.68  | 3.77  | -0.09 |
| 1-Propylamine                                   | 3.6   | 3.55  | 0.05  |
| 1-Tridecanol                                    | 8.19  | 8.07  | 0.12  |
| 1-Undecanol                                     | 7.27  | 7.21  | 0.06  |
| 2-(3,4-Epoxy cyclohexyl)ethyltriethoxysilane    | 8.45  | 7.88  | 0.57  |
| 2-(4-Bromophenoxy)phenol                        | 8.3   | 9.46  | -1.16 |
| 2,2,2-Trichloroethanol                          | 5.15  | 5.03  | 0.12  |
| 2,2,2-Trifluoroethanol                          | 3.33  | 3.35  | -0.02 |
| 2,2,3,3,3-Pentafluoro-1-propanol                | 3.69  | 3.58  | 0.11  |

|                                            |       |       |       |
|--------------------------------------------|-------|-------|-------|
| 2,2',3,3',4,4',5,5',6-Nonachlorobiphenyl   | 11.47 | 11.54 | -0.07 |
| 2,2',3,3',4,4',5,5'-Octachlorobiphenyl     | 11.31 | 10.94 | 0.37  |
| 2,2',3,3',4,4',5,6,6'-Nonachlorobiphenyl   | 10.93 | 11.54 | -0.61 |
| 2,2',3,3',4,4',5,6'-Octachlorobiphenyl     | 10.82 | 10.94 | -0.12 |
| 2,2',3,3',4,4',5,6-Octachlorobiphenyl      | 11.12 | 10.94 | 0.18  |
| 2,2',3,3',4,4',5-Heptachlorobiphenyl       | 10.78 | 10.34 | 0.44  |
| 2,2',3,3',4,4',6,6'-Octachlorobiphenyl     | 10.22 | 10.94 | -0.72 |
| 2,2',3,3',4,4',6-Heptachlorobiphenyl       | 10.25 | 10.34 | -0.09 |
| 2,2',3,3',4,4'-Hexachlorobiphenyl          | 10.36 | 9.74  | 0.62  |
| 2,2',3,3',4,4'-Hexachlorodiphenyl ether    | 9.55  | 9.78  | -0.23 |
| 2,2',3,3',4,5,5',6,6'-Nonachlorobiphenyl   | 10.93 | 11.54 | -0.61 |
| 2,2',3,3',4,5,5',6'-Octachlorobiphenyl     | 10.67 | 10.94 | -0.27 |
| 2,2',3,3',4,5,5',6-Octachlorobiphenyl      | 10.73 | 10.94 | -0.21 |
| 2,2',3,3',4,5,5'-Heptachlorobiphenyl       | 10.38 | 10.34 | 0.04  |
| 2,2',3,3',4,5,6,6'-Octachlorobiphenyl      | 10.74 | 10.94 | -0.20 |
| 2,2',3,3',4,5',6,6'-Octachlorobiphenyl     | 10.51 | 10.94 | -0.43 |
| 2,2',3,3',4,5',6-Heptachlorobiphenyl       | 9.88  | 10.34 | -0.46 |
| 2,2',3,3',4,5,6'-Heptachlorobiphenyl       | 10.22 | 10.34 | -0.12 |
| 2,2',3,3',4,5',6'-Heptachlorobiphenyl      | 10.29 | 10.34 | -0.05 |
| 2,2',3,3',4,5,6-Heptachlorobiphenyl        | 10.3  | 10.34 | -0.04 |
| 2,2',3,3',4,5'-Hexachlorobiphenyl          | 9.3   | 9.74  | -0.44 |
| 2,2',3,3',4,5-Hexachlorobiphenyl           | 10.07 | 9.74  | 0.33  |
| 2,2',3,3',4,6,6'-Heptachlorobiphenyl       | 9.8   | 10.34 | -0.54 |
| 2,2',3,3',4,6'-Hexachlorobiphenyl          | 9.8   | 9.74  | 0.06  |
| 2,2',3,3',4,6-Hexachlorobiphenyl           | 9.49  | 9.74  | -0.25 |
| 2,2',3,3',4-Pentabromodiphenyl ether       | 11.14 | 10.83 | 0.31  |
| 2,2',3,3',5,5',6,6'-Octachlorobiphenyl     | 10.08 | 10.94 | -0.86 |
| 2,2',3,3',5,5',6-Heptachlorobiphenyl       | 9.83  | 10.34 | -0.51 |
| 2,2',3,3',5,6,6'-Heptachlorobiphenyl       | 9.81  | 10.34 | -0.53 |
| 2,2',3,3',5,6'-Hexachlorobiphenyl          | 9.42  | 9.74  | -0.32 |
| 2,2',3,3',5,6-Hexachlorobiphenyl           | 9.44  | 9.74  | -0.30 |
| 2,2',3,3',5-Pentachlorobiphenyl            | 9.13  | 9.14  | -0.01 |
| 2,2',3,3',6,6'-Hexachlorobiphenyl          | 9.27  | 9.74  | -0.47 |
| 2,2',3,3',6-Pentachlorobiphenyl            | 8.8   | 9.14  | -0.34 |
| 2,2',3,3'-Tetrachlorobiphenyl              | 8.86  | 8.54  | 0.32  |
| 2,2',3,4,4',5,5',6-Octachlorobiphenyl      | 10.79 | 10.94 | -0.15 |
| 2,2',3,4,4',5,5'-Heptachlorobiphenyl       | 10.52 | 10.34 | 0.18  |
| 2,2',3,4,4',5,5'-Heptachlorodiphenyl ether | 9.15  | 10.38 | -1.23 |
| 2,2',3,4,4',5,6-Heptachlorobiphenyl        | 10.51 | 10.34 | 0.17  |
| 2,2',3,4,4',5',6-Heptachlorobiphenyl       | 10.32 | 10.34 | -0.02 |
| 2,2',3,4,4',5'-Hexachlorobiphenyl          | 9.81  | 9.74  | 0.07  |
| 2,2',3,4,4',5-Hexachlorobiphenyl           | 10.1  | 9.74  | 0.36  |



|                                         |       |       |       |
|-----------------------------------------|-------|-------|-------|
| 2,2',3,4,4',5'-Hexachlorodiphenyl ether | 9.45  | 9.78  | -0.33 |
| 2,2',3,4,4',5'-Hexachlorodiphenyl ether | 9.14  | 9.78  | -0.64 |
| 2,2',3,4,4',6'-Hexachlorobiphenyl       | 9.62  | 9.74  | -0.12 |
| 2,2',3,4,4',6'-Hexachlorodiphenyl ether | 9.04  | 9.78  | -0.74 |
| 2,2',3,4,4'-Pentabromodiphenyl ether    | 11.63 | 10.83 | 0.80  |
| 2,2',3,4,4'-Pentachlorobiphenyl         | 9.52  | 9.14  | 0.38  |
| 2,2',3,4,4'-Pentachlorodiphenyl ether   | 8.71  | 9.18  | -0.47 |
| 2,2',3,4,5,5',6'-Heptachlorobiphenyl    | 10.4  | 10.34 | 0.06  |
| 2,2',3,4,5,5',6'-Heptachlorobiphenyl    | 10.27 | 10.34 | -0.07 |
| 2,2',3,4,5,5'-Hexachlorobiphenyl        | 9.79  | 9.74  | 0.05  |
| 2,2',3,4,5,5'-Hexachlorobiphenyl        | 9.56  | 9.74  | -0.18 |
| 2,2',3,4,5,6'-Hexachlorobiphenyl        | 9.39  | 9.74  | -0.35 |
| 2,2',3,4,5,6'-Hexachlorobiphenyl        | 9.34  | 9.74  | -0.40 |
| 2,2',3,4,5,6'-Hexachlorobiphenyl        | 9.47  | 9.74  | -0.27 |
| 2,2',3,4,5'-Pentachlorobiphenyl         | 9.21  | 9.14  | 0.07  |
| 2,2',3,4,5'-Pentachlorobiphenyl         | 9.18  | 9.14  | 0.04  |
| 2,2',3,4,6'-Pentachlorobiphenyl         | 8.94  | 9.14  | -0.20 |
| 2,2',3,4'-Tetrachlorobiphenyl           | 8.64  | 8.54  | 0.10  |
| 2,2',3,4'-Tetrachlorobiphenyl           | 8.58  | 8.54  | 0.04  |
| 2,2',3,5,5',6'-Hexachlorobiphenyl       | 9.61  | 9.74  | -0.13 |
| 2,2',3,5',6'-Pentachlorobiphenyl        | 8.8   | 9.14  | -0.34 |
| 2,2',3,5'-Tetrachlorobiphenyl           | 8.36  | 8.54  | -0.18 |
| 2,2',3,6,6'-Pentachlorobiphenyl         | 8.53  | 9.14  | -0.61 |
| 2,2',3,6'-Tetrachlorobiphenyl           | 8.32  | 8.54  | -0.22 |
| 2,2',3,6'-Tetrachlorobiphenyl           | 8.62  | 8.54  | 0.08  |
| 2,2',3-Trichlorobiphenyl                | 7.76  | 7.94  | -0.18 |
| 2,2',4,4',5,5'-Hexabromobiphenyl        | 12    | 11.72 | 0.28  |
| 2,2',4,4',5,5'-Hexabromodiphenyl ether  | 12.15 | 11.76 | 0.39  |
| 2,2',4,4',5,5'-Hexachlorobiphenyl       | 9.8   | 9.74  | 0.06  |
| 2,2',4,4',5,5'-Hexachlorodiphenyl ether | 8.64  | 9.78  | -1.14 |
| 2,2',4,4',5,6'-Hexabromodiphenyl ether  | 11.94 | 11.76 | 0.18  |
| 2,2',4,4',5,6'-Hexachlorodiphenyl ether | 8.41  | 9.78  | -1.37 |
| 2,2',4,4',5-Pentabromodiphenyl ether    | 11.45 | 10.83 | 0.62  |
| 2,2',4,4',5-Pentachlorobiphenyl         | 9.24  | 9.14  | 0.10  |
| 2,2',4,4',5-Pentachlorodiphenyl ether   | 8.39  | 9.18  | -0.79 |
| 2,2',4,4',6,6'-Hexachlorobiphenyl       | 8.99  | 9.74  | -0.75 |
| 2,2',4,4',6-Pentabromodiphenyl ether    | 11.18 | 10.83 | 0.35  |
| 2,2',4,4',6-Pentachlorodiphenyl ether   | 8.14  | 9.18  | -1.04 |
| 2,2',4,4'-Tetrabromodiphenyl ether      | 10.34 | 9.9   | 0.44  |
| 2,2',4,4'-Tetrachlorobiphenyl           | 8.31  | 8.54  | -0.23 |
| 2,2',4,4'-Tetrachlorodiphenyl ether     | 8.08  | 8.58  | -0.50 |
| 2,2',4,5,5'-PCB                         | 9.04  | 9.14  | -0.10 |

|                                         |       |       |       |
|-----------------------------------------|-------|-------|-------|
| 2,2',4,5,5'-Pentachlorodiphenyl ether   | 8.14  | 9.18  | -1.04 |
| 2,2',4,5',6-Pentabromobiphenyl          | 10.46 | 10.79 | -0.33 |
| 2,2',4,5'-Tetrabromobiphenyl            | 9.83  | 9.86  | -0.03 |
| 2,2',4,5'-Tetrachlorobiphenyl           | 8.3   | 8.54  | -0.24 |
| 2,2',4,5-Tetrachlorobiphenyl            | 8.25  | 8.54  | -0.29 |
| 2,2',4,6,6'-Pentachlorobiphenyl         | 8.16  | 9.14  | -0.98 |
| 2,2',4,6'-Tetrachlorobiphenyl           | 7.95  | 8.54  | -0.59 |
| 2,2',4-Tribromodiphenyl ether           | 9.27  | 8.97  | 0.30  |
| 2,2',4-Trichlorobiphenyl                | 7.51  | 7.94  | -0.43 |
| 2,2',4-Trichlorodiphenylether           | 8.09  | 7.98  | 0.11  |
| 2,2',5,5'-Tetrachlorobiphenyl           | 8.25  | 8.54  | -0.29 |
| 2,2',5,6'-Tetrachlorobiphenyl           | 7.93  | 8.54  | -0.61 |
| 2,2',5-Trichlorobiphenyl                | 7.56  | 7.94  | -0.38 |
| 2,2',6,6'-Tetrachlorobiphenyl           | 7.76  | 8.54  | -0.78 |
| 2,2',6-Trichlorobiphenyl                | 7.54  | 7.94  | -0.40 |
| 2,2-Dichloro-1,1,1-trifluoroethane      | 1.78  | 2.58  | -0.80 |
| 2,2'-Dichlorobiphenyl                   | 6.86  | 7.34  | -0.48 |
| 2,2'-Dichlorodiisopropyl ether          | 4.3   | 4.29  | 0.01  |
| 2,2-Dichloropropane                     | 2.3   | 2.56  | -0.26 |
| 2,2-Dichloropropionic acid              | 6.53  | 5.75  | 0.78  |
| 2,2-Dimethyl-1,3-dioxolane              | 3.38  | 3.59  | -0.21 |
| 2,2-Dimethylpropane                     | 1.41  | 1.66  | -0.25 |
| 2,3,3',4,4',5,5',6-Octachlorobiphenyl   | 11.31 | 10.94 | 0.37  |
| 2,3,3',4,4',5,5'-Heptachlorobiphenyl    | 11.22 | 10.34 | 0.88  |
| 2,3,3',4,4',5,6-Heptachlorobiphenyl     | 10.57 | 10.34 | 0.23  |
| 2,3,3',4,4',5',6-Heptachlorobiphenyl    | 10.62 | 10.34 | 0.28  |
| 2,3,3',4,4',5-Hexabromodiphenyl ether   | 11.98 | 11.76 | 0.22  |
| 2,3,3',4,4',5'-Hexachlorobiphenyl       | 10.77 | 9.74  | 1.03  |
| 2,3,3',4,4',5-Hexachlorobiphenyl        | 10.57 | 9.74  | 0.83  |
| 2,3,3',4,4',6-Hexachlorobiphenyl        | 9.86  | 9.74  | 0.12  |
| 2,3,3',4,4'-Pentachlorobiphenyl         | 9.53  | 9.14  | 0.39  |
| 2,3,3',4,4'-Pentachlorodiphenyl ether   | 8.89  | 9.18  | -0.29 |
| 2,3,3',4',5,5',6-Heptachlorobiphenyl    | 10.53 | 10.34 | 0.19  |
| 2,3,3',4,5,5'-Hexachlorobiphenyl        | 9.91  | 9.74  | 0.17  |
| 2,3,3',4,5,6-Hexachlorobiphenyl         | 10.32 | 9.74  | 0.58  |
| 2,3,3',4',5,6-Hexachlorobiphenyl        | 9.89  | 9.74  | 0.15  |
| 2,3,3',4',6-Pentachlorobiphenyl         | 9.06  | 9.14  | -0.08 |
| 2,3,3',4'-Tetrachlorobiphenyl           | 8.45  | 8.54  | -0.09 |
| 2,3,3',4-Tetrachlorobiphenyl            | 8.81  | 8.54  | 0.27  |
| 2,3,3',5,5',6-Hexachlorobiphenyl        | 10.36 | 9.74  | 0.62  |
| 2,3,3'-Trichlorobiphenyl                | 8.24  | 7.94  | 0.30  |
| 2,3',4,4',5,5'-Hexachlorodiphenyl ether | 8.93  | 9.78  | -0.85 |

|                                      |       |       |       |
|--------------------------------------|-------|-------|-------|
| 2,3,4,4',5,6-Hexachlorobiphenyl      | 10    | 9.74  | 0.26  |
| 2,3,4,4',5-Pentachlorobiphenyl       | 10.04 | 9.14  | 0.90  |
| 2,3',4,4',5-Pentachlorobiphenyl      | 9.47  | 9.14  | 0.33  |
| 2,3',4,4',6-Pentabromodiphenyl ether | 11.52 | 10.83 | 0.69  |
| 2,3',4,4',6-Pentachlorobiphenyl      | 9.03  | 9.14  | -0.11 |
| 2,3',4,4'-Tetrabromodiphenyl ether   | 10.58 | 9.9   | 0.68  |
| 2,3,4,4'-Tetrachlorobiphenyl         | 9.13  | 8.54  | 0.59  |
| 2,3',4,4'-Tetrachlorobiphenyl        | 9.02  | 8.54  | 0.48  |
| 2,3',4,4'-Tetrachlorodiphenyl ether  | 8.22  | 8.58  | -0.36 |
| 2,3,4,5,6-Pentachlorobiphenyl        | 9.06  | 9.14  | -0.08 |
| 2,3,4,5,6-Pentafluorotoluene         | 3.19  | 2.83  | 0.36  |
| 2,3,4,5-Tetrachloroanisole           | 5.9   | 6.24  | -0.34 |
| 2,3',4,5-Tetrachlorobiphenyl         | 9.11  | 8.54  | 0.57  |
| 2,3,4',5-Tetrachlorobiphenyl         | 8.79  | 8.54  | 0.25  |
| 2,3',4',5-Tetrachlorobiphenyl        | 8.87  | 8.54  | 0.33  |
| 2,3,4,6,7,8-Hexachlorodibenzofuran   | 10.87 | 10.74 | 0.13  |
| 2,3',4,6-Tetrabromodiphenyl ether    | 10.23 | 9.9   | 0.33  |
| 2,3,4,6-Tetrachloroanisole           | 6.02  | 6.24  | -0.22 |
| 2,3',4,6-Tetrachlorobiphenyl         | 8.38  | 8.54  | -0.16 |
| 2,3,4',6-Tetrachlorobiphenyl         | 8.38  | 8.54  | -0.16 |
| 2,3',4',6-Tetrachlorobiphenyl        | 8.61  | 8.54  | 0.07  |
| 2,3,4,6-Tetrachlorophenol            | 8.01  | 8.07  | -0.06 |
| 2,3,4,7,8-Pentachlorodibenzofuran    | 10.37 | 10.14 | 0.23  |
| 2,3,4-Tribromoanisole                | 6.36  | 6.63  | -0.27 |
| 2,3,4-Tribromodiphenylether          | 9.49  | 8.97  | 0.52  |
| 2,3,4-Trichloroanisole               | 5.61  | 5.64  | -0.03 |
| 2,3',4-Trichlorobiphenyl             | 8.02  | 7.94  | 0.08  |
| 2,3,4'-Trichlorobiphenyl             | 8.33  | 7.94  | 0.39  |
| 2,3',4'-Trichlorobiphenyl            | 8.2   | 7.94  | 0.26  |
| 2',3,4-Trichlorodiphenylether        | 8.59  | 7.98  | 0.61  |
| 2,3',4-Trichlorodiphenylether        | 8.43  | 7.98  | 0.45  |
| 2,3,4'-Trichlorodiphenylether        | 8.72  | 7.98  | 0.74  |
| 2,3,4-Trimethylpentane               | 3.2   | 2.63  | 0.57  |
| 2,3,5,6-Tetrabromo-p-xylene          | 8.85  | 7.86  | 0.99  |
| 2,3,5,6-Tetrachloroanisole           | 5.71  | 6.24  | -0.53 |
| 2,3,5,6-Tetrachlorobiphenyl          | 8.18  | 8.54  | -0.36 |
| 2,3,5,6-Tetrachloropyridine          | 5.41  | 5.93  | -0.52 |
| 2,3',5-Tribromobiphenyl              | 9.13  | 8.93  | 0.20  |
| 2,3,5-Trichloroanisole               | 5.39  | 5.64  | -0.25 |
| 2,3',5'-Trichlorobiphenyl            | 8.03  | 7.94  | 0.09  |
| 2,3',5-Trichlorobiphenyl             | 7.99  | 7.94  | 0.05  |
| 2,3,5-Trichlorodiphenylether         | 8.55  | 7.98  | 0.57  |

|                                     |       |       |       |
|-------------------------------------|-------|-------|-------|
| 2,3,5-Trichlorophenol               | 7.33  | 7.47  | -0.14 |
| 2,3,6,7-Tetrachloronaphthalene      | 8.4   | 8.12  | 0.28  |
| 2,3,6-Tribromoanisole               | 6.48  | 6.63  | -0.15 |
| 2,3,6-Trichloroanisole              | 5.22  | 5.64  | -0.42 |
| 2,3,6-Trichlorobiphenyl             | 7.94  | 7.94  | 0.00  |
| 2,3,6-Trichlorodiphenylether        | 7.4   | 7.98  | -0.58 |
| 2,3,6-Trimethylnaphthalene          | 6.68  | 6.56  | 0.12  |
| 2,3,7,8-Tetrachlorodibenzofuran     | 9.89  | 9.54  | 0.35  |
| 2,3,7,8-Tetrachlorodibenzo-p-dioxin | 10.05 | 9.58  | 0.47  |
| 2,3,7-Trichlorodibenzo-p-dioxin     | 9.14  | 8.98  | 0.16  |
| 2,3,8-Trichlorodibenzofuran         | 8.93  | 8.94  | -0.01 |
| 2,3-Butanedione                     | 2.92  | 3.48  | -0.56 |
| 2,3-Butyl dinitrate                 | 4.78  | 5.06  | -0.28 |
| 2,3-Butyleneglycol                  | 5.3   | 5.78  | -0.48 |
| 2,3-Dibromo-5,6-dichloroanisole     | 6.64  | 6.9   | -0.26 |
| 2,3-Dichloro-1.4-naphthoquinone     | 7.72  | 7.68  | 0.04  |
| 2,3-Dichloroanisole                 | 5.06  | 5.04  | 0.02  |
| 2,3'-Dichlorobiphenyl               | 7.31  | 7.34  | -0.03 |
| 2,3-Dichlorobiphenyl                | 7.35  | 7.34  | 0.01  |
| 2,3-Dichlorodibenzofuran            | 8.3   | 8.34  | -0.04 |
| 2,3-Dichlorodibenzo-p-dioxin        | 8.5   | 8.38  | 0.12  |
| 2,3-Dichloronitrobenzene            | 6.55  | 5.94  | 0.61  |
| 2,3-Dichlorophenol                  | 6.15  | 6.87  | -0.72 |
| 2,3-Dichloropropene                 | 3.12  | 2.6   | 0.52  |
| 2,3-Diethyl-5-methylpyrazine        | 5.15  | 5.76  | -0.61 |
| 2,3-Dimethyl-2-butanol              | 4.35  | 4.27  | 0.08  |
| 2,3-Dimethylbutane                  | 1.84  | 2.16  | -0.32 |
| 2,3-Naphthalenediol                 | 10.64 | 10.42 | 0.22  |
| 2,3-Xylenol                         | 6.87  | 6.49  | 0.38  |
| 2,3-Xylidine                        | 5.77  | 6.2   | -0.43 |
| 2,4,4',5-Tetrachlorobiphenyl        | 8.86  | 8.54  | 0.32  |
| 2,4,4',5-Tetrachlorodiphenyl ether  | 7.95  | 8.58  | -0.63 |
| 2,4,4',6-Tetrabromodiphenyl ether   | 10.13 | 9.9   | 0.23  |
| 2,4,4',6-Tetrachlorobiphenyl        | 8.09  | 8.54  | -0.45 |
| 2,4,4'-Tribromodiphenyl ether       | 9.46  | 8.97  | 0.49  |
| 2,4,4'-Trichlorobiphenyl            | 7.92  | 7.94  | -0.02 |
| 2,4,4'-Trichlorodiphenyl ether      | 7.61  | 7.98  | -0.37 |
| 2,4,5-T                             | 9.59  | 9.13  | 0.46  |
| 2,4',5-Tribromobiphenyl             | 9.21  | 8.93  | 0.28  |
| 2,4,5-Trichloroanisole              | 5.43  | 5.64  | -0.21 |
| 2,4,5-Trichlorobiphenyl             | 7.96  | 7.94  | 0.02  |
| 2,4',5-Trichlorobiphenyl            | 7.92  | 7.94  | -0.02 |

|                                 |      |      |       |
|---------------------------------|------|------|-------|
| 2,4,5-Trichlorodiphenyl ether   | 7.12 | 7.98 | -0.86 |
| 2,4',5-Trichlorodiphenyl ether  | 8.46 | 7.98 | 0.48  |
| 2,4,5-Trichlorophenol           | 6.9  | 7.47 | -0.57 |
| 2,4,5-Trimethylaniline          | 6.15 | 6.61 | -0.46 |
| 2,4,5-Trimethylnaphthalene      | 6.81 | 6.56 | 0.25  |
| 2,4,6-Collidine                 | 5.15 | 4.56 | 0.59  |
| 2,4,6-Tribromo-3-chloroanisole  | 6.64 | 7.23 | -0.59 |
| 2,4,6-Tribromoanisole           | 6.21 | 6.63 | -0.42 |
| 2,4,6-Tribromodiphenyl ether    | 9.02 | 8.97 | 0.05  |
| 2,4',6-Tribromodiphenyl ether   | 9.28 | 8.97 | 0.31  |
| 2,4,6-Trichloroanisole          | 5.17 | 5.64 | -0.47 |
| 2,4,6-Trichlorobiphenyl         | 7.56 | 7.94 | -0.38 |
| 2,4',6-Trichlorobiphenyl        | 7.74 | 7.94 | -0.20 |
| 2,4,6-Trichlorodibenzofuran     | 8.82 | 8.94 | -0.12 |
| 2,4',6-Trichlorodiphenylether   | 7.49 | 7.98 | -0.49 |
| 2,4,6-Trichlorophenol           | 6.96 | 7.47 | -0.51 |
| 2,4,8-Trichlorodibenzofuran     | 8.82 | 8.94 | -0.12 |
| 2,4-Dibromo-3,5-dichloroanisole | 6.64 | 6.9  | -0.26 |
| 2,4-Dibromo-3-chloroanisole     | 6.06 | 6.3  | -0.24 |
| 2,4-Dibromo-5,6-dichloroanisole | 6.35 | 6.9  | -0.55 |
| 2,4-Dibromo-5-chloroanisole     | 6.18 | 6.3  | -0.12 |
| 2,4-Dibromoanisole              | 6.05 | 5.7  | 0.35  |
| 2,4'-Dibromodiphenyl ether      | 8.47 | 8.04 | 0.43  |
| 2,4-Dibromodiphenyl ether       | 8.37 | 8.04 | 0.33  |
| 2,4-Dichloroanisole             | 4.96 | 5.04 | -0.08 |
| 2,4'-Dichlorobiphenyl           | 7.37 | 7.34 | 0.03  |
| 2,4-Dichlorobiphenyl            | 7.15 | 7.34 | -0.19 |
| 2,4-Dichlorodiphenyl ether      | 7.7  | 7.38 | 0.32  |
| 2,4-Dichloronitrobenzene        | 6.15 | 5.94 | 0.21  |
| 2,4-Dichlorophenol              | 6.72 | 6.87 | -0.15 |
| 2,4-Dichlorotoluene             | 5.17 | 4.93 | 0.24  |
| 2,4-Dimethyl-3-pentanone        | 3.82 | 3.54 | 0.28  |
| 2,4-Dimethylpentane             | 2.63 | 2.54 | 0.09  |
| 2,4-Dinitrotoluene              | 6.96 | 6.57 | 0.39  |
| 2,4-Lutidine                    | 5.22 | 4.48 | 0.74  |
| 2,4-Xylenol                     | 6.58 | 6.49 | 0.09  |
| 2,4-Xylidine                    | 5.37 | 6.2  | -0.83 |
| 2,5-Dichloroanisole             | 5    | 5.04 | -0.04 |
| 2,5-Dichlorobiphenyl            | 7.16 | 7.34 | -0.18 |
| 2,5-Dimethyl-2,4-hexadiene      | 3.31 | 3.22 | 0.09  |
| 2,5-Dimethylhexane              | 3.1  | 2.92 | 0.18  |
| 2,5-Dimethylpyrazine            | 4.69 | 4.82 | -0.13 |

|                                    |       |       |       |
|------------------------------------|-------|-------|-------|
| 2,5-Dinitrophenol                  | 7.06  | 7     | 0.06  |
| 2,5-Dinitrotoluene                 | 6.53  | 6.57  | -0.04 |
| 2,5-Hexanediol                     | 7.25  | 6.64  | 0.61  |
| 2,5-Hexyl dinitrate                | 5.93  | 5.92  | 0.01  |
| 2,5-Xylenol                        | 6.54  | 6.49  | 0.05  |
| 2,5-Xylidine                       | 5.5   | 6.2   | -0.70 |
| 2,6-Dibromo-3,4,5-trichloroanisole | 6.88  | 7.5   | -0.62 |
| 2,6-Dibromo-4-chloroanisole        | 5.77  | 6.3   | -0.53 |
| 2,6-Dibromoanisole                 | 5.37  | 5.7   | -0.33 |
| 2,6-Dibromodiphenyl ether          | 8.12  | 8.04  | 0.08  |
| 2,6-Dichloro-4-nitroaniline        | 8.1   | 8     | 0.10  |
| 2,6-Dichloroanisole                | 4.55  | 5.04  | -0.49 |
| 2,6-Dichlorobenzonitrile           | 5.71  | 5.73  | -0.02 |
| 2,6-Dichlorobiphenyl               | 7.18  | 7.34  | -0.16 |
| 2,6-Dichlorodiphenyl ether         | 6.82  | 7.38  | -0.56 |
| 2,6-Dichlorophenol                 | 6.03  | 6.87  | -0.84 |
| 2,6-Dichlorotoluene                | 5.13  | 4.93  | 0.20  |
| 2,6-Diisopropylnaphthalene         | 8.1   | 7.2   | 0.90  |
| 2,6-Dimethoxyphenol                | 6.05  | 6.71  | -0.66 |
| 2,6-Dimethylnaphthalene            | 6.3   | 6.18  | 0.12  |
| 2,6-Dimethyl-N-nitrosomorpholine   | 5.05  | 5.31  | -0.26 |
| 2,6-Dimethylpyrazine               | 3.8   | 4.82  | -1.02 |
| 2,6-Dinitro-4-methylphenol         | 7.87  | 7.41  | 0.46  |
| 2,6-Dinitrotoluene                 | 6.99  | 6.57  | 0.42  |
| 2,6-Lutidine                       | 4.94  | 4.15  | 0.79  |
| 2,6-Xylenol                        | 6.11  | 6.49  | -0.38 |
| 2,6-Xylidine                       | 5.54  | 6.2   | -0.66 |
| 2,7-Dichlorodibenzofuran           | 8.27  | 8.34  | -0.07 |
| 2,7-Dichlorodibenzo-p-dioxin       | 8.36  | 8.38  | -0.02 |
| 2,7-Dichloronaphthalene            | 6.7   | 6.92  | -0.22 |
| 2,7-Dimethylnaphthalene            | 6.14  | 6.18  | -0.04 |
| 2,8-Dichlorodibenzofuran           | 8.36  | 8.34  | 0.02  |
| 2,8-Dichlorodibenzo-p-dioxin       | 8.36  | 8.38  | -0.02 |
| 2,5-Dichloronitrobenzene           | 6.27  | 5.94  | 0.33  |
| 2-Aminoanthraquinone               | 11.49 | 11.32 | 0.17  |
| 2-Anisaldehyde                     | 5.94  | 5.32  | 0.62  |
| 2-Bromo-3,4,5-trichloroanisole     | 6.35  | 6.57  | -0.22 |
| 2-Bromo-3,5-dichloroanisole        | 5.82  | 5.97  | -0.15 |
| 2-Bromo-4,6-dichloroanisole        | 5.48  | 5.97  | -0.49 |
| 2-Bromo-4-chloroanisole            | 5.26  | 5.37  | -0.11 |
| 2-Bromo-6-chloroanisole            | 4.96  | 5.37  | -0.41 |
| 2-Bromoanisole                     | 4.7   | 4.77  | -0.07 |

|                                                  |       |       |       |
|--------------------------------------------------|-------|-------|-------|
| 2-Bromodiphenyl ether                            | 7.24  | 7.11  | 0.13  |
| 2-Bromofluorene                                  | 8.06  | 8.46  | -0.40 |
| 2-Bromopropane                                   | 2.48  | 2.63  | -0.15 |
| 2-Bromotoluene                                   | 4.56  | 4.66  | -0.10 |
| 2-Butanol                                        | 3.85  | 3.95  | -0.10 |
| 2-Butanone                                       | 2.79  | 2.83  | -0.04 |
| 2-Butylamine                                     | 3.61  | 3.65  | -0.04 |
| 2-Chloro-2-methylbutane                          | 2.45  | 2.55  | -0.10 |
| 2-Chloro-2-methylpropane                         | 1.84  | 2.12  | -0.28 |
| 2-Chloro-4-nitroaniline                          | 7.82  | 7.4   | 0.42  |
| 2-Chloro-6-(trichloromethyl)pyridine             | 6.21  | 6.13  | 0.08  |
| 2-Chloroaniline                                  | 5.39  | 5.98  | -0.59 |
| 2-Chloroanisole                                  | 5.1   | 4.44  | 0.66  |
| 2-Chloroanthracene                               | 8.47  | 8.72  | -0.25 |
| 2-Chlorobiphenyl                                 | 6.43  | 6.74  | -0.31 |
| 2-Chlorobutane                                   | 2.38  | 2.96  | -0.58 |
| 2-Chlorodibenzofuran                             | 7.67  | 7.74  | -0.07 |
| 2-Chlorodibenzo-p-dioxin                         | 7.56  | 7.78  | -0.22 |
| 2-Chlorodiphenyl ether                           | 6.42  | 6.78  | -0.36 |
| 2-Chloroethanol                                  | 4.3   | 4.12  | 0.18  |
| 2-Chloronaphthalene                              | 5.76  | 6.32  | -0.56 |
| 2-Chloronitrobenzene                             | 5.2   | 5.34  | -0.14 |
| 2-Chlorophenol                                   | 5.4   | 6.27  | -0.87 |
| 2-Chloropropane                                  | 2.05  | 2.53  | -0.48 |
| 2-Chloropyridine                                 | 4.37  | 4.36  | 0.01  |
| 2-Chlorotoluene                                  | 4.11  | 4.33  | -0.22 |
| 2-Cresyl diphenyl phosphate                      | 10.7  | 10.39 | 0.31  |
| 2-Decanone                                       | 5.48  | 5.41  | 0.07  |
| 2-Ethoxyethanol                                  | 4.12  | 4.39  | -0.27 |
| 2-Ethoxyethylacetate                             | 4.43  | 4.03  | 0.40  |
| 2-Ethyl-1-hexanol                                | 5.58  | 5.63  | -0.05 |
| 2-Ethyl-3-methoxypyrazine                        | 4.92  | 5.4   | -0.48 |
| 2-Ethylaniline                                   | 5.43  | 6.22  | -0.79 |
| 2-Ethylbutanoic acid                             | 5.72  | 5.94  | -0.22 |
| 2-Ethylhexanoic acid                             | 6.28  | 6.8   | -0.52 |
| 2-Ethylhexyl 2-(2,4-dichlorophenoxy)acetate      | 9.12  | 9.29  | -0.17 |
| 2-Ethylhexyl 2-(4-chloro-2-methylphenoxy)acetate | 9.83  | 9.1   | 0.73  |
| 2-Ethylhexyl 2,3,4,5-tetrabromobenzoate          | 10.43 | 11.4  | -0.97 |
| 2-Ethylhexyl acetate                             | 6.11  | 5.27  | 0.84  |
| 2-Ethylhexylamine                                | 5.19  | 5.41  | -0.22 |
| 2-Ethyl-naphthalene                              | 6.12  | 6.2   | -0.08 |
| 2-Ethylpyridine                                  | 4.76  | 4.5   | 0.26  |

|                                              |       |       |       |
|----------------------------------------------|-------|-------|-------|
| 2-Ethyltoluene                               | 4.23  | 4.3   | -0.07 |
| 2-Fluoroaniline                              | 4.66  | 5.2   | -0.54 |
| 2-Fluoroethanol                              | 1.98  | 2.64  | -0.66 |
| 2-Fluorophenol                               | 5.46  | 5.49  | -0.03 |
| 2-Heptanol                                   | 5.1   | 5.24  | -0.14 |
| 2-Heptanone                                  | 4.15  | 4.12  | 0.03  |
| 2-Heptenal                                   | 4.55  | 4.36  | 0.19  |
| 2-Hexanol                                    | 4.73  | 4.81  | -0.08 |
| 2'-Hydroxy-2,4-dibromodiphenylether          | 9.23  | 10.39 | -1.16 |
| 2-Hydroxy-4-methoxybenzophenone              | 9.06  | 8.58  | 0.48  |
| 2-Hydroxyacetophenone                        | 5.21  | 5.65  | -0.44 |
| 2-Hydroxyethylmethacrylate                   | 5.3   | 5.61  | -0.31 |
| 2-Iodophenol                                 | 7.07  | 7.5   | -0.43 |
| 2-Isopropoxyethanol                          | 4.65  | 4.57  | 0.08  |
| 2-Isopropyl-5-methylphenol                   | 7.05  | 7.06  | -0.01 |
| 2-Isopropylaniline                           | 5.59  | 6.36  | -0.77 |
| 2-Isopropyl-naphthalene                      | 6.21  | 6.31  | -0.10 |
| 2-Isopropyltoluene                           | 4.84  | 4.41  | 0.43  |
| 2'-Methoxy-2,3',4,5'-tetrabromodiphenylether | 10.57 | 10.42 | 0.15  |
| 2'-Methoxy-2,4,4'-tribromodiphenylether      | 10.1  | 9.49  | 0.61  |
| 2-Methoxyacetophenone                        | 6.27  | 5.33  | 0.94  |
| 2-Methoxyaniline                             | 5.26  | 5.9   | -0.64 |
| 2-Methoxyethylamine                          | 3.81  | 3.87  | -0.06 |
| 2-Methoxynitrobenzene                        | 5.4   | 5.26  | 0.14  |
| 2-Methoxyphenol                              | 5.26  | 6.19  | -0.93 |
| 2-Methyl-1-butanol                           | 4.41  | 4.34  | 0.07  |
| 2-Methyl-1-propanol                          | 3.93  | 3.91  | 0.02  |
| 2-Methyl-2-butanol                           | 4.01  | 4.13  | -0.12 |
| 2-Methyl-2-propanol                          | 3.5   | 3.7   | -0.20 |
| 2-Methyl-3-buten-2-ol                        | 3.89  | 3.99  | -0.10 |
| 2-Methylacrylonitrile                        | 2.6   | 2.73  | -0.13 |
| 2-Methylbenzaldehyde                         | 4.88  | 5.21  | -0.33 |
| 2-Methylbutyric acid                         | 5.24  | 5.51  | -0.27 |
| 2-Methylfuran                                | 2.43  | 2.85  | -0.42 |
| 2-Methylnaphthalene                          | 5.11  | 5.8   | -0.69 |
| 2-Methylpentane                              | 2.34  | 2.45  | -0.11 |
| 2-Methylpropane                              | 1.23  | 1.69  | -0.46 |
| 2-Methylpropanoic acid                       | 5.21  | 5.08  | 0.13  |
| 2-Methylpropenoic acid                       | 5.65  | 5.12  | 0.53  |
| 2-Methylpyrazine                             | 4.05  | 4.74  | -0.69 |
| 2-Methylquinoline                            | 6.99  | 6.37  | 0.62  |
| 2-Methylthiophene                            | 3.48  | 3.4   | 0.08  |



|                                                                                            |       |       |       |
|--------------------------------------------------------------------------------------------|-------|-------|-------|
| 2-Naphthol                                                                                 | 8.47  | 8.07  | 0.40  |
| 2-Naphthylamine                                                                            | 7.59  | 7.78  | -0.19 |
| 2-n-Hexoxyethanol                                                                          | 5.76  | 6.11  | -0.35 |
| 2-Nitroaniline                                                                             | 6.46  | 5.29  | 1.17  |
| 2-Nitrophenol                                                                              | 5.05  | 5.58  | -0.53 |
| 2-Nitrotoluene                                                                             | 4.87  | 5.15  | -0.28 |
| 2-Nonanone                                                                                 | 5.03  | 4.98  | 0.05  |
| 2-Nonenal                                                                                  | 4.41  | 5.22  | -0.81 |
| 2-Octanol                                                                                  | 5.67  | 5.67  | 0.00  |
| 2-Octanone                                                                                 | 4.44  | 4.55  | -0.11 |
| 2-Pentanol                                                                                 | 4.29  | 4.38  | -0.09 |
| 2-Phenoxyethanol                                                                           | 5.86  | 6.16  | -0.30 |
| 2-Picoline                                                                                 | 4.3   | 4.07  | 0.23  |
| 2-Propanol                                                                                 | 3.41  | 3.52  | -0.11 |
| 2-Propynyl-(2E,4E)-3,7,11-trimethyl-2,4-dodecadienoate                                     | 8.19  | 7.88  | 0.31  |
| 2-s-Butylphenol                                                                            | 6.68  | 7.08  | -0.40 |
| 2-Tolunitrile                                                                              | 4.69  | 4.94  | -0.25 |
| 2-Undecanone                                                                               | 5.73  | 5.84  | -0.11 |
| 3,3,4,4,5,5,6,6,6-Nonafluorohexan-1-ol                                                     | 4.54  | 4.47  | 0.07  |
| 3,3,4,4,5,5,6,6,7,7,8,8,8-Tridecafluorooctan-1-ol                                          | 5.26  | 4.93  | 0.33  |
| 3,3,4,4,5,5,6,6,7,7,8,8,8-Tridecafluorooctyl prop-2-enoate                                 | 4.67  | 4.79  | -0.12 |
| 3,3,4,4,5,5,6,6,7,7,8,8,9,9,10,10,10-Heptadecafluorodecan-1-ol                             | 5.56  | 5.39  | 0.17  |
| 3,3,4,4,5,5,6,6,7,7,8,8,9,9,10,10,10-Heptadecafluorodecyl prop-2-enoate                    | 5.34  | 5.25  | 0.09  |
| 3,3,4,4,5,5,6,6,7,7,8,8,9,9,10,10,11,11,12,12,12-Henicosafuorododecan-1-ol                 | 5.71  | 5.85  | -0.14 |
| 3,3,4,4,5,5,6,6,7,7,8,8,9,9,10,10,11,11,12,12,12-Henicosafuorododecyl prop-2-enoate        | 5.68  | 5.71  | -0.03 |
| 3,3,4,4,5,5,6,6,7,7,8,8,9,9,10,10,11,11,12,12,13,13,14,14,14-Pentacosafuorotetradecan-1-ol | 6.16  | 6.31  | -0.15 |
| 3,3',4,4',5,5'-Hexachlorobiphenyl                                                          | 11.02 | 9.74  | 1.28  |
| 3,3',4,4',5-Pentabromodiphenyl ether                                                       | 12    | 10.83 | 1.17  |
| 3,3',4,4',5-Pentachlorobiphenyl                                                            | 10.31 | 9.14  | 1.17  |
| 3,3',4,4',5-Pentachlorodiphenyl ether                                                      | 8.74  | 9.18  | -0.44 |
| 3,3',4,4'-Tetrabromodiphenyl ether                                                         | 10.7  | 9.9   | 0.80  |
| 3,3',4,4'-Tetrachlorobiphenyl                                                              | 9.29  | 8.54  | 0.75  |
| 3,3',4,4'-Tetrachlorodiphenyl ether                                                        | 8.7   | 8.58  | 0.12  |
| 3,3',4-Tribromodiphenyl ether                                                              | 9.61  | 8.97  | 0.64  |
| 3,3',4-Trichlorodiphenylether                                                              | 8.69  | 7.98  | 0.71  |
| 3,3',5,5'-Tetrachlorobiphenyl                                                              | 7.7   | 8.54  | -0.84 |
| 3,3',5-Trichlorobiphenyl                                                                   | 8.21  | 7.94  | 0.27  |
| 3,3,5-Trimethylcyclohexyl salicylate                                                       | 8.56  | 8.34  | 0.22  |

|                                      |       |      |       |
|--------------------------------------|-------|------|-------|
| 3,3'-Dichlorobiphenyl                | 7.66  | 7.34 | 0.32  |
| 3,4,4',5-Tetrachlorobiphenyl         | 9.67  | 8.54 | 1.13  |
| 3,4,4'-Tribromodiphenyl ether        | 9.68  | 8.97 | 0.71  |
| 3,4,4'-Trichlorobiphenyl             | 8.64  | 7.94 | 0.70  |
| 3,4,4'-Trichlorodiphenylether        | 8.71  | 7.98 | 0.73  |
| 3,4,5,6-Tetrachloroguaiacol          | 8.02  | 8.59 | -0.57 |
| 3,4,5-Trichloroanisole               | 5.58  | 5.64 | -0.06 |
| 3,4,5-Trichlorocatechol              | 9.36  | 9.82 | -0.46 |
| 3,4',5-Trichlorodiphenylether        | 8.51  | 7.98 | 0.53  |
| 3,4,5-Trichloroguaiacol              | 8.02  | 7.99 | 0.03  |
| 3,4,5-Trichloroveratrole             | 6.84  | 6.16 | 0.68  |
| 3,4'-Dibromodiphenyl ether           | 8.57  | 8.04 | 0.53  |
| 3,4-Dibromodiphenyl ether            | 8.55  | 8.04 | 0.51  |
| 3,4-Dichloro-1-butene                | 3.52  | 3.53 | -0.01 |
| 3,4-Dichloroaniline                  | 7.05  | 6.58 | 0.47  |
| 3,4-Dichloroanisole                  | 5.11  | 5.04 | 0.07  |
| 3,4'-Dichlorobiphenyl                | 7.47  | 7.34 | 0.13  |
| 3,4-Dichlorobiphenyl                 | 7.57  | 7.34 | 0.23  |
| 3,4'-Dichlorodiphenylether           | 7.75  | 7.38 | 0.37  |
| 3,4-Dichlorodiphenylether            | 7.54  | 7.38 | 0.16  |
| 3,4-Dichlorofluoranthene             | 10.48 | 10.7 | -0.22 |
| 3,4-Dichloronitrobenzene             | 6.53  | 5.94 | 0.59  |
| 3,4-Dichlorotoluene                  | 5     | 4.93 | 0.07  |
| 3,4-Dihydro-4H-pyran                 | 2.07  | 2.74 | -0.67 |
| 3,4-Dimethylphenyl N-methylcarbamate | 7.29  | 8.03 | -0.74 |
| 3,4-Lutidine                         | 5.38  | 4.81 | 0.57  |
| 3,4-Xylenol                          | 6.85  | 6.49 | 0.36  |
| 3,4-Xylidine                         | 5.85  | 6.2  | -0.35 |
| 3,5,5-Trimethyl-1-hexanol            | 5.52  | 5.36 | 0.16  |
| 3,5,5-Trimethyl-2-cyclohexenone      | 5.15  | 4.84 | 0.31  |
| 3,5-Dibromo-4-hydroxybenzonitrile    | 8.99  | 8.74 | 0.25  |
| 3,5-Dichloroanisole                  | 4.83  | 5.04 | -0.21 |
| 3,5-Dichlorobiphenyl                 | 7.52  | 7.34 | 0.18  |
| 3,5-Dichlorodiphenylether            | 7.57  | 7.38 | 0.19  |
| 3,5-Lutidine                         | 5.22  | 4.81 | 0.41  |
| 3,5-Xylenol                          | 6.81  | 6.49 | 0.32  |
| 3,6-Dichlorodibenzofuran             | 8.33  | 8.34 | -0.01 |
| 3,6-Dichloropicolinic acid           | 9.14  | 8.23 | 0.91  |
| 3,8-Dichlorofluoranthene             | 10.32 | 10.7 | -0.38 |
| 3,9,10-Trichlorophenanthrene         | 9.98  | 9.92 | 0.06  |
| 3,9-Dichlorophenanthrene             | 9.24  | 9.32 | -0.08 |
| 3-Acetylpyridine                     | 6.22  | 5.48 | 0.74  |

|                                                 |       |       |       |
|-------------------------------------------------|-------|-------|-------|
| 3-Aminophenylsulfur pentafluoride               | 7     | 6.8   | 0.20  |
| 3-Anisaldehyde                                  | 5.64  | 5.32  | 0.32  |
| 3-Bromo-2,4,6-trichloroanisole                  | 6.06  | 6.57  | -0.51 |
| 3-Bromo-2,4-dichloroanisole                     | 5.54  | 5.97  | -0.43 |
| 3-Bromo-2,5,6-trichloroanisole                  | 6.07  | 6.57  | -0.50 |
| 3-Bromo-2,6-dichloroanisole                     | 5.7   | 5.97  | -0.27 |
| 3-Bromoanisole                                  | 4.43  | 4.77  | -0.34 |
| 3-Bromodiphenyl ether                           | 7.36  | 7.11  | 0.25  |
| 3-Bromonitrobenzene                             | 6.65  | 5.67  | 0.98  |
| 3-Bromopyridine                                 | 4.81  | 4.92  | -0.11 |
| 3-Bromotoluene                                  | 4.03  | 4.66  | -0.63 |
| 3-Buten-2-one                                   | 2.95  | 2.62  | 0.33  |
| 3-Carene                                        | 3.8   | 4.41  | -0.61 |
| 3-Chloro-1-propanol                             | 4.81  | 4.55  | 0.26  |
| 3-Chloro-2-methylpropene                        | 2.46  | 2.71  | -0.25 |
| 3-Chloro-4-methylaniline                        | 6.42  | 6.39  | 0.03  |
| 3-Chloroaniline                                 | 6.01  | 5.98  | 0.03  |
| 3-Chloroanisole                                 | 4.92  | 4.44  | 0.48  |
| 3-Chlorobiphenyl                                | 6.78  | 6.74  | 0.04  |
| 3-Chlorodibenzofuran                            | 7.67  | 7.74  | -0.07 |
| 3-Chlorofluoranthene                            | 9.54  | 10.1  | -0.56 |
| 3-Chloronitrobenzene                            | 5.64  | 5.34  | 0.30  |
| 3-Chlorophenol                                  | 7.21  | 6.27  | 0.94  |
| 3-Chloropyridine                                | 4.17  | 4.59  | -0.42 |
| 3-Chlorotoluene                                 | 4.15  | 4.33  | -0.18 |
| 3-Ethylphenol                                   | 6.86  | 6.51  | 0.35  |
| 3-Ethylpyridine                                 | 4.92  | 4.83  | 0.09  |
| 3-Heptanol                                      | 5.08  | 5.24  | -0.16 |
| 3-Hexanol                                       | 4.54  | 4.81  | -0.27 |
| 3-Hydroxy-2,2',4,4',5,6'-hexabromodiphenylether | 12.78 | 14.11 | -1.33 |
| 3-Hydroxy-2,2',4,4'-tetrabromodiphenylether     | 11.12 | 12.25 | -1.13 |
| 3'-Hydroxy-2,4,4'-tribromodiphenylether         | 10.29 | 11.32 | -1.03 |
| 3'-Hydroxy-2,4-dibromodiphenylether             | 9.96  | 10.39 | -0.43 |
| 3-Hydroxybenzaldehyde                           | 8.02  | 7.15  | 0.87  |
| 3-Isopropylbiphenyl                             | 6.69  | 6.67  | 0.02  |
| 3-Isopropyltoluene                              | 5.17  | 4.41  | 0.76  |
| 3-Methoxy-2,2',4,4',5,6'-hexabromodiphenylether | 12.1  | 12.28 | -0.18 |
| 3-Methoxy-2,2',4,4'-tetrabromodiphenylether     | 10.77 | 10.42 | 0.35  |
| 3-Methoxy-4-hydroxybenzaldehyde                 | 7.37  | 7.67  | -0.30 |
| 3-Methoxyacetophenone                           | 6.33  | 5.33  | 1.00  |
| 3-Methoxyphenol                                 | 6.76  | 6.19  | 0.57  |
| 3-Methyl-2-butanol                              | 4.3   | 4.09  | 0.21  |

|                                                                   |       |       |       |
|-------------------------------------------------------------------|-------|-------|-------|
| 3-Methyl-2-butanone                                               | 3.04  | 2.97  | 0.07  |
| 3-Methyl-2-nitrophenol                                            | 5.98  | 5.99  | -0.01 |
| 3-Methyl-4-nitrophenol                                            | 8.29  | 7.5   | 0.79  |
| 3-Methylbutanoic acid                                             | 5.46  | 5.51  | -0.05 |
| 3-Methylbutyl nitrate                                             | 3.9   | 4.01  | -0.11 |
| 3-Methylpentane                                                   | 1.93  | 2.45  | -0.52 |
| 3-Methylpyridine                                                  | 4.57  | 4.4   | 0.17  |
| 3-Methylstyrene                                                   | 4.3   | 4.09  | 0.21  |
| 3-Methylthiophene                                                 | 3.01  | 3.19  | -0.18 |
| 3-Nitroaniline                                                    | 7.62  | 6.8   | 0.82  |
| 3-Nitrotoluene                                                    | 5.19  | 5.15  | 0.04  |
| 3-Pentanol                                                        | 4.28  | 4.38  | -0.10 |
| 3-Propyltoluene                                                   | 5.09  | 4.7   | 0.39  |
| 3-Pyridinecarbonitrile                                            | 5.08  | 5.2   | -0.12 |
| 3-Pyridinecarboxaldehyde                                          | 5.26  | 5.47  | -0.21 |
| 3-t-Butylphenol                                                   | 7.32  | 6.67  | 0.65  |
| 3-Trifluoromethylaniline                                          | 5.19  | 5.8   | -0.61 |
| 4-(2,4-Dichlorophenoxy)butyric acid                               | 10.18 | 9.39  | 0.79  |
| 4,4'-Bipyridine                                                   | 7.78  | 7.48  | 0.30  |
| 4,4'-Dibromobiphenyl                                              | 8.5   | 8     | 0.50  |
| 4,4'-Dibromodiphenyl ether                                        | 8.64  | 8.04  | 0.60  |
| 4,4'-Dichlorobiphenyl                                             | 7.63  | 7.34  | 0.29  |
| 4,5,6-Trichloroguaiacol                                           | 6.66  | 7.99  | -1.33 |
| 4,5-Dichloroguaiacol                                              | 6.94  | 7.39  | -0.45 |
| 4,6,6,7,8,8-Hexamethyl-1,3,4,7-tetrahydrocyclopenta[g]isochromene | 8.15  | 8.06  | 0.09  |
| 4,6-Dinitro-o-cresol                                              | 6.89  | 7.41  | -0.52 |
| 4,7-Dibromobenz[a]anthracene                                      | 12.78 | 12.38 | 0.40  |
| 4-Acetylanisole                                                   | 6.26  | 5.33  | 0.93  |
| 4-Acetylpyridine                                                  | 5.82  | 5.48  | 0.34  |
| 4-Allyl-2-methoxyphenol                                           | 6.48  | 7.25  | -0.77 |
| 4-Amino-3,5,6-trichloro-2-pyridinecarboxlic acid                  | 11.5  | 10.89 | 0.61  |
| 4-Aminophenylsulfur pentafluoride                                 | 7.01  | 6.8   | 0.21  |
| 4-Bromo-2,3,5,6-tetrachloroanisole                                | 6.61  | 7.17  | -0.56 |
| 4-Bromo-2,3,6-trichloroanisole                                    | 6.07  | 6.57  | -0.50 |
| 4-bromo-2,3-Dichloroanisole                                       | 5.9   | 5.97  | -0.07 |
| 4-Bromo-2,6-dichloroanisole                                       | 5.49  | 5.97  | -0.48 |
| 4-Bromo-2-chloroanisole                                           | 5.26  | 5.37  | -0.11 |
| 4-Bromo-3,5-dichloroanisole                                       | 5.82  | 5.97  | -0.15 |
| 4-Bromoanisole                                                    | 4.48  | 4.77  | -0.29 |
| 4-Bromobiphenyl                                                   | 7.22  | 7.07  | 0.15  |
| 4-Bromiodobenzene                                                 | 5.87  | 6.08  | -0.21 |

|                                               |       |       |       |
|-----------------------------------------------|-------|-------|-------|
| 4-Bromophenol                                 | 7.67  | 6.6   | 1.07  |
| 4-Bromotoluene                                | 4.39  | 4.66  | -0.27 |
| 4-Carboxyphenol                               | 10.03 | 9.27  | 0.76  |
| 4-Chloro-2-methylphenol                       | 7.02  | 6.68  | 0.34  |
| 4-Chloro-2-nitrophenol                        | 5.67  | 6.18  | -0.51 |
| 4-Chloro-6-nitro-m-cresol                     | 5.58  | 6.59  | -1.01 |
| 4-Chloroaniline                               | 6.02  | 5.98  | 0.04  |
| 4-Chloroanisole                               | 4.97  | 4.44  | 0.53  |
| 4-Chlorobiphenyl                              | 6.77  | 6.74  | 0.03  |
| 4-Chlorodiphenyl ether                        | 6.84  | 6.78  | 0.06  |
| 4-Chloriodobenzene                            | 5.34  | 5.75  | -0.41 |
| 4-Chloro-m-cresol                             | 7.95  | 6.68  | 1.27  |
| 4-Chloronitrobenzene                          | 5.24  | 5.34  | -0.10 |
| 4-Chlorophenol                                | 7.39  | 6.27  | 1.12  |
| 4-Chlorotoluene                               | 4.15  | 4.33  | -0.18 |
| 4-Cyanopyridine                               | 4.68  | 5.2   | -0.52 |
| 4-Ethylaniline                                | 5.64  | 6.22  | -0.58 |
| 4-Ethylphenol                                 | 6.84  | 6.51  | 0.33  |
| 4-Ethylpyridine                               | 5     | 4.83  | 0.17  |
| 4-Ethyltoluene                                | 4.28  | 4.3   | -0.02 |
| 4-Fluoroaniline                               | 4.77  | 5.2   | -0.43 |
| 4-Fluoriodobenzene                            | 4.63  | 4.97  | -0.34 |
| 4-Fluorophenol                                | 6.16  | 5.49  | 0.67  |
| 4-Heptanol                                    | 5.08  | 5.24  | -0.16 |
| 4-Heptanone                                   | 4.13  | 4.12  | 0.01  |
| 4-Hydroxy-2,2',3,4',5-pentabromodiphenylether | 12.01 | 13.18 | -1.17 |
| 4-Hydroxy-2,2',3,4'-tetrabromodiphenylether   | 10.95 | 12.25 | -1.30 |
| 4'-Hydroxy-2,2',4,5'-tetrabromodiphenylether  | 11    | 12.25 | -1.25 |
| 4-Hydroxyazobenzene                           | 10.51 | 10.83 | -0.32 |
| 4-Iodophenol                                  | 8.09  | 7.5   | 0.59  |
| 4-Isopropylbiphenyl                           | 6.77  | 6.67  | 0.10  |
| 4-Methoxy-2,2',3,4',5-pentabromodiphenylether | 11.62 | 11.35 | 0.27  |
| 4-Methoxy-2-nitrophenol                       | 5.85  | 6.1   | -0.25 |
| 4-Methoxy-4-methyl-2-pentanone                | 4.4   | 3.94  | 0.46  |
| 4-Methoxyaniline                              | 6.22  | 5.9   | 0.32  |
| 4-Methoxybenzaldehyde                         | 6.22  | 5.32  | 0.90  |
| 4-Methyl-1-pentanol                           | 4.52  | 4.77  | -0.25 |
| 4-Methyl-1-pentene                            | 2.1   | 2.36  | -0.26 |
| 4-Methyl-2-nitrophenol                        | 5.34  | 5.99  | -0.65 |
| 4-Methylacetophenone                          | 5.45  | 5.22  | 0.23  |
| 4-Methylbenzaldehyde                          | 5     | 5.21  | -0.21 |
| 4-Methylcyclohexanone                         | 4.52  | 4.39  | 0.13  |

|                                                 |       |       |       |
|-------------------------------------------------|-------|-------|-------|
| 4-Methylpyridine                                | 4.7   | 4.4   | 0.30  |
| 4-Nitroanisole                                  | 6     | 5.26  | 0.74  |
| 4-Nitrooxy-1-butanol                            | 6.91  | 5.89  | 1.02  |
| 4-Nitrooxy-2-butanol                            | 6.23  | 5.64  | 0.59  |
| 4-Nitrophenylsulfur pentafluoride               | 5.77  | 6.16  | -0.39 |
| 4-Nitrotoluene                                  | 4.88  | 5.15  | -0.27 |
| 4-Nonylphenol                                   | 9.73  | 9.52  | 0.21  |
| 4-Octanol                                       | 5.37  | 5.67  | -0.30 |
| 4-Phenylcyclohexene                             | 5.66  | 5.72  | -0.06 |
| 4-Propylphenol                                  | 7.22  | 6.94  | 0.28  |
| 4-Pyridinecarboxaldehyde                        | 5.34  | 5.47  | -0.13 |
| 4-s-Butyl-2-nitrophenol                         | 6.15  | 6.99  | -0.84 |
| 4-t-Butylphenol                                 | 7.53  | 6.67  | 0.86  |
| 4-t-Butyltoluene                                | 4.39  | 4.4   | -0.01 |
| 4-t-Octylphenol                                 | 8.6   | 7.69  | 0.91  |
| 4-Vinylcyclohexene                              | 3.79  | 3.65  | 0.14  |
| 4-Vinylpyridine                                 | 4.67  | 4.62  | 0.05  |
| 5,7-Dibromobenz[a]anthracene                    | 12.83 | 12.38 | 0.45  |
| 5-Amino-1H-1,2,4-triazole                       | 8.09  | 7.83  | 0.26  |
| 5-Bromo-2,4-dichloroanisole                     | 5.9   | 5.97  | -0.07 |
| 5-Ethylidene-2-norbornene                       | 4.23  | 4.75  | -0.52 |
| 5-Fluoro-2-nitrophenol                          | 4.77  | 5.4   | -0.63 |
| 5-Isopropyl-2-methylphenol                      | 7.2   | 7.06  | 0.14  |
| 5-Methyl-2-furaldehyde                          | 4.56  | 4.59  | -0.03 |
| 5-Methyl-2-nitrophenol                          | 5.35  | 5.99  | -0.64 |
| 5-Nitrooxy-2-pentanol                           | 6.53  | 6.07  | 0.46  |
| 5-Nonanone                                      | 4.8   | 4.98  | -0.18 |
| 6,12-Dichlorochrysene                           | 12.08 | 11.72 | 0.36  |
| 6-Bromo-2,3,4-trichloroanisole                  | 6.05  | 6.57  | -0.52 |
| 6-Bromo-2,3-dichloroanisole                     | 5.9   | 5.97  | -0.07 |
| 6-Bromobenzo[a]pyrene                           | 12.95 | 13.23 | -0.28 |
| 6-Chlorobenzo[a]pyrene                          | 12.76 | 12.9  | -0.14 |
| 6-Chlorochrysene                                | 11.3  | 11.12 | 0.18  |
| 6-Hydroxy-2,2',3,3',4'-pentabromodiphenylether  | 12.42 | 13.18 | -0.76 |
| 6-Hydroxy-2,2',3,4,4'-pentabromodiphenylether   | 11.95 | 13.18 | -1.23 |
| 6-Hydroxy-2,2',3,4,5'-pentabromodiphenylether   | 12.03 | 13.18 | -1.15 |
| 6'-Hydroxy-2,2',4,4',5'-pentabromodiphenylether | 12.23 | 13.18 | -0.95 |
| 6-Hydroxy-2,3,3',4,4',5'-hexabromodiphenylether | 13.29 | 14.11 | -0.82 |
| 6-Methoxy-2,2',3,3',4'-pentabromodiphenylether  | 11.98 | 11.35 | 0.63  |
| 6-Methoxy-2,2',3,4,5'-pentabromodiphenylether   | 11.52 | 11.35 | 0.17  |
| 6'-Methoxy-2,2',4,4',5'-pentabromodiphenylether | 11.36 | 11.35 | 0.01  |
| 6-Methoxy-2,2',4,4'-tetrabromodiphenylether     | 10.77 | 10.42 | 0.35  |

|                                                |       |       |       |
|------------------------------------------------|-------|-------|-------|
| 6-Methoxy-2,3,3',4,4',5-hexabromodiphenylether | 12.89 | 12.28 | 0.61  |
| 7,11-Dibromobenz[a]anthracene                  | 12.62 | 12.38 | 0.24  |
| 7,12-Dibromobenz[a]anthracene                  | 12.66 | 12.38 | 0.28  |
| 7,12-Dichlorobenz[a]anthracene                 | 12.05 | 11.72 | 0.33  |
| 7-Bromobenz[a]anthracene                       | 11.73 | 11.45 | 0.28  |
| 7-Chlorobenz[a]anthracene                      | 11.34 | 11.12 | 0.22  |
| 8-Chlorofluoranthene                           | 9.58  | 10.1  | -0.52 |
| 9,10-Anthraquinone                             | 8.28  | 9.26  | -0.98 |
| 9,10-Dibromoanthracene                         | 10.05 | 9.98  | 0.07  |
| 9,10-Dichlorophenanthrene                      | 9.3   | 9.32  | -0.02 |
| 9,10-Dihydrophenanthrene                       | 7.03  | 7.43  | -0.40 |
| 9-Bromoanthracene                              | 8.94  | 9.05  | -0.11 |
| 9-Bromophenanthrene                            | 8.87  | 9.05  | -0.18 |
| 9-Chloroanthracene                             | 8.47  | 8.72  | -0.25 |
| 9-Chlorophenanthrene                           | 8.41  | 8.72  | -0.31 |
| 9H-Fluoren-9-one                               | 7.93  | 8.18  | -0.25 |
| Abate                                          | 11.56 | 12.26 | -0.70 |
| Acenaphthene                                   | 6.52  | 7.07  | -0.55 |
| Acenaphthylene                                 | 6.34  | 7     | -0.66 |
| Acetaldehyde                                   | 2.23  | 2.39  | -0.16 |
| Acetamide                                      | 5.38  | 5.05  | 0.33  |
| Acetic acid                                    | 4.31  | 4.51  | -0.20 |
| Acetochlor                                     | 8.62  | 8.16  | 0.46  |
| Acetonitrile                                   | 2.31  | 2.12  | 0.19  |
| Acetophenone                                   | 4.45  | 4.81  | -0.36 |
| Acetylacetone (enol form)                      | 4.06  | 3.84  | 0.22  |
| Aclonifen                                      | 9.96  | 8.75  | 1.21  |
| Acrylic acid                                   | 5.01  | 4.73  | 0.28  |
| Acticin                                        | 12.19 | 11.34 | 0.85  |
| Adiponitrile                                   | 5.64  | 4.64  | 1.00  |
| Alachlor                                       | 9.31  | 8.29  | 1.02  |
| Aldicarb                                       | 8.32  | 8.05  | 0.27  |
| Aldrin                                         | 8.07  | 8.36  | -0.29 |
| all-trans-1,5,9-Cyclododecatriene              | 5.43  | 5.39  | 0.04  |
| Allyl acetate                                  | 3.03  | 3.2   | -0.17 |
| Allyl alcohol                                  | 3.66  | 3.56  | 0.10  |
| Allyl bromide                                  | 2.42  | 2.66  | -0.24 |
| Allyl chloride                                 | 1.67  | 2.32  | -0.65 |
| Allyl cyanide                                  | 2.95  | 2.77  | 0.18  |
| Allyl glycidyl ether                           | 3.99  | 3.63  | 0.36  |
| Allyl methacrylate                             | 4.12  | 3.81  | 0.31  |
| Allylamine                                     | 3.28  | 3.34  | -0.06 |

|                             |       |       |       |
|-----------------------------|-------|-------|-------|
| alpha-Hexachlorocyclohexane | 7.62  | 8.06  | -0.44 |
| alpha-Methylstyrene         | 4.44  | 4.07  | 0.37  |
| alpha-Phellandrene          | 4.41  | 4.37  | 0.04  |
| alpha-Pinene                | 3.75  | 4.41  | -0.66 |
| alpha-Terpinene             | 3.9   | 4.62  | -0.72 |
| alpha-Terpineol             | 6.73  | 6.44  | 0.29  |
| Altosid                     | 9.2   | 8.31  | 0.89  |
| Ambrette musk               | 8.11  | 8.09  | 0.02  |
| Ametryn                     | 9.52  | 9.77  | -0.25 |
| Amicarbazone                | 11.04 | 11.12 | -0.08 |
| Aminocarb                   | 8.52  | 9.11  | -0.59 |
| Amyl acetate                | 4.12  | 4.27  | -0.15 |
| Amyl propionate             | 4.21  | 4.7   | -0.49 |
| Amylamine                   | 4.39  | 4.41  | -0.02 |
| Amylbenzene                 | 5.26  | 5.12  | 0.14  |
| Ancymidol                   | 11.35 | 11.04 | 0.31  |
| Aniline                     | 4.48  | 5.38  | -0.90 |
| Anisole                     | 4.01  | 3.84  | 0.17  |
| Anthracene                  | 7.71  | 7.7   | 0.01  |
| Antor                       | 9.74  | 10.07 | -0.33 |
| Arachic alcohol             | 12.06 | 11.08 | 0.98  |
| Aspirin                     | 8.19  | 7.11  | 1.08  |
| Atratone                    | 9.87  | 9.17  | 0.70  |
| Atrazine                    | 9.08  | 8.89  | 0.19  |
| Azaconazole                 | 10.15 | 9.86  | 0.29  |
| Azamethiphos                | 9.58  | 9.95  | -0.37 |
| Azoxystrobin                | 13.13 | 13.04 | 0.09  |
| Bayleton                    | 10.98 | 10.66 | 0.32  |
| Beflubutamid                | 11.49 | 11.57 | -0.08 |
| Benazolin                   | 10.99 | 10.42 | 0.57  |
| Benazolin-ethyl             | 8.42  | 8.89  | -0.47 |
| Benomyl                     | 11.48 | 11.09 | 0.39  |
| Benoxacor                   | 7.85  | 7.93  | -0.08 |
| Benz[a]anthracene           | 10.28 | 9.98  | 0.30  |
| Benz[e]acephenanthrylene    | 11.34 | 11.3  | 0.04  |
| Benzalchloride              | 5.01  | 4.98  | 0.03  |
| Benzaldehyde                | 4.41  | 4.8   | -0.39 |
| Benzamide                   | 8.31  | 7.46  | 0.85  |
| Benzene                     | 2.8   | 3.14  | -0.34 |
| Benzo[a]phenanthrene        | 9.85  | 9.98  | -0.13 |
| Benzo[a]pyrene              | 11.56 | 11.7  | -0.14 |
| Benzo[b]fluorene            | 9.42  | 9.42  | 0.00  |



|                          |       |       |       |
|--------------------------|-------|-------|-------|
| Benzo[b]triphenylene     | 12.11 | 12.26 | -0.15 |
| Benzo[e]pyrene           | 10.72 | 11.7  | -0.98 |
| Benzo[f]quinoline        | 8.43  | 8.69  | -0.26 |
| Benzo[g,h,i]perylene     | 12.55 | 13.42 | -0.87 |
| Benzo[k]fluoranthene     | 11.37 | 11.3  | 0.07  |
| Benzoic acid             | 7.23  | 6.92  | 0.31  |
| Benzonitrile             | 4.46  | 4.53  | -0.07 |
| Benzophosphate           | 9.91  | 9.95  | -0.04 |
| Benzotrifluoride         | 3.24  | 3.74  | -0.50 |
| Benzoximate              | 9.27  | 9.25  | 0.02  |
| Benzyl acetate           | 5.2   | 5.39  | -0.19 |
| Benzyl benzoate          | 7.94  | 7.8   | 0.14  |
| Benzyl butyl phthalate   | 9.66  | 10.73 | -1.07 |
| Benzyl methyl ether      | 4.29  | 4.48  | -0.19 |
| beta-Citronellol         | 6.51  | 6.27  | 0.24  |
| beta-HCH                 | 8.74  | 8.06  | 0.68  |
| beta-Ionone              | 6.19  | 6.23  | -0.04 |
| beta-Phellandrene        | 4.42  | 4.23  | 0.19  |
| Bifenazate               | 10.88 | 10.59 | 0.29  |
| Bifenoxy                 | 11.7  | 10.57 | 1.13  |
| Bioallethrin             | 9.94  | 9.81  | 0.13  |
| Biphenyl                 | 5.88  | 5.78  | 0.10  |
| Bis(2-chloroethyl) ether | 3.5   | 3.93  | -0.43 |
| Bitertanol               | 14.23 | 13.98 | 0.25  |
| Borneol                  | 5.69  | 5.96  | -0.27 |
| Bromacil                 | 10.02 | 9.92  | 0.10  |
| Bromoacetic acid         | 6.69  | 5.63  | 1.06  |
| Bromobenzene             | 4.08  | 4.25  | -0.17 |
| Bromobutide              | 9.01  | 9.85  | -0.84 |
| Bromocyclohexane         | 3.67  | 4.26  | -0.59 |
| Bromoethane              | 2.11  | 2.44  | -0.33 |
| Bromofenoxim             | 13.26 | 13.94 | -0.68 |
| Bromophos                | 7.18  | 8.08  | -0.90 |
| Bromophos-ethyl          | 9.22  | 8.68  | 0.54  |
| Bromoxynil butyrate      | 8.62  | 8.95  | -0.33 |
| Bromoxynil heptanoate    | 9.3   | 10.24 | -0.94 |
| Bromoxynil octanoate     | 10.26 | 10.67 | -0.41 |
| Bromuconazole            | 11.07 | 10.37 | 0.70  |
| Butachlor                | 10.12 | 9.1   | 1.02  |
| Butamifos                | 9.52  | 9.59  | -0.07 |
| Butanal                  | 3.39  | 3.25  | 0.14  |
| Butanamide               | 6.39  | 5.91  | 0.48  |

|                              |       |       |       |
|------------------------------|-------|-------|-------|
| Butane                       | 1.53  | 1.98  | -0.45 |
| Butanedioic acid             | 9.54  | 9.76  | -0.22 |
| Butanoic acid                | 5.3   | 5.37  | -0.07 |
| Butenachlor                  | 8.79  | 9.27  | -0.48 |
| Butocarboxim                 | 8.23  | 7.98  | 0.25  |
| Butralin                     | 8.18  | 8.68  | -0.50 |
| Buturon                      | 10.27 | 9.95  | 0.32  |
| Butyl 4-hydroxybenzoate      | 9.63  | 8.6   | 1.03  |
| Butylate                     | 6.64  | 6.91  | -0.27 |
| Butylbenzene                 | 4.34  | 4.72  | -0.38 |
| Butylcellosolve              | 4.84  | 5.25  | -0.41 |
| Butylmethylketone            | 3.68  | 3.69  | -0.01 |
| Butylnitrate                 | 3.34  | 3.87  | -0.53 |
| Butyric acid methylester     | 3.29  | 3.54  | -0.25 |
| Butyronitrile                | 3.12  | 2.98  | 0.14  |
| Cafenstrole                  | 12.22 | 11.97 | 0.25  |
| Camphene                     | 4.04  | 4.27  | -0.23 |
| Camphor                      | 5.21  | 5.06  | 0.15  |
| Capraldehyde                 | 5.32  | 5.83  | -0.51 |
| Caproic aldehyde             | 4.41  | 4.11  | 0.30  |
| Caprylene                    | 3.35  | 3.45  | -0.10 |
| Caprylic aldehyde            | 5.36  | 4.97  | 0.39  |
| Carbaril                     | 9.55  | 9.61  | -0.06 |
| Carbazole                    | 8.03  | 8.3   | -0.27 |
| Carbendazim                  | 9.83  | 10.32 | -0.49 |
| Carbofuran                   | 9.24  | 9.15  | 0.09  |
| Carbophenothion              | 10.15 | 9.85  | 0.30  |
| Carbophos                    | 7.83  | 8.52  | -0.69 |
| Carvone                      | 5.72  | 5.43  | 0.29  |
| Cashmeran                    | 6.43  | 6.74  | -0.31 |
| Celestolide                  | 7.58  | 8     | -0.42 |
| CGA307771                    | 12.4  | 12.45 | -0.05 |
| Chloral                      | 3.44  | 4.08  | -0.64 |
| Chloral hydrate              | 7.65  | 7.55  | 0.10  |
| Chlordane                    | 8.92  | 8.82  | 0.10  |
| Chlordimeform                | 7.22  | 6.58  | 0.64  |
| Chlorfenidim                 | 9.01  | 9.14  | -0.13 |
| Chlorimuron-ethyl            | 13.95 | 14.57 | -0.62 |
| Chlormethine                 | 4.29  | 4.68  | -0.39 |
| Chloroacetic acid            | 6.34  | 5.29  | 1.05  |
| Chloroacetic acid ethylester | 3.62  | 3.76  | -0.14 |
| Chloroacetonitrile           | 3.19  | 2.9   | 0.29  |

|                                     |       |       |       |
|-------------------------------------|-------|-------|-------|
| Chlorobenzene                       | 3.58  | 3.92  | -0.34 |
| Chlorobenzilate                     | 10.44 | 11.38 | -0.94 |
| Chloroethane                        | 1.78  | 2.1   | -0.32 |
| Chloroethylene                      | 0.9   | 1.71  | -0.81 |
| Chlorophthalim                      | 9.26  | 9.62  | -0.36 |
| Chloropropham                       | 7.94  | 7.89  | 0.05  |
| Chlorothalonil                      | 8.11  | 8.14  | -0.03 |
| Chloroxifenidim                     | 11.49 | 12    | -0.51 |
| Chlorpyrifos-methyl                 | 7.97  | 7.9   | 0.07  |
| Chlorpyriphos                       | 8.41  | 8.5   | -0.09 |
| Chlorsulfuron                       | 12.84 | 13.08 | -0.24 |
| Chlorthion                          | 8.55  | 7.97  | 0.58  |
| Chlortoluron                        | 9.92  | 9.55  | 0.37  |
| Chlozolate                          | 9.04  | 9.24  | -0.20 |
| Ciafos                              | 6.96  | 7.16  | -0.20 |
| Cimetacarb                          | 11.24 | 11.09 | 0.15  |
| Cinmethylin                         | 9.12  | 8.4   | 0.72  |
| cis-1,1,1,4,4,4-Hexafluoro-2-butene | 1.55  | 2.02  | -0.47 |
| cis-1,2-Cyclohexyl dinitrate        | 6.4   | 6.26  | 0.14  |
| cis-1,2-Dichloroethylene            | 2.6   | 2.34  | 0.26  |
| cis-1,3-Cyclohexyl dinitrate        | 6.49  | 6.26  | 0.23  |
| cis-1,3-Dichloropropene             | 2.68  | 2.45  | 0.23  |
| cis-1,4-Dichloro-2-butene           | 4.04  | 3.56  | 0.48  |
| cis-2,4-Pentyl dinitrate            | 5.43  | 5.49  | -0.06 |
| cis-2,5-Dimethyltetrahydrofuran     | 3.28  | 3.18  | 0.10  |
| cis-2-Butene                        | 1.43  | 1.88  | -0.45 |
| cis-Nonachlor                       | 9.66  | 9.6   | 0.06  |
| Clodinafop-propargyl                | 10.69 | 9.93  | 0.76  |
| Clofenotane                         | 9.88  | 9.6   | 0.28  |
| Clofenvinfos                        | 9.78  | 9.42  | 0.36  |
| Cloquintocet-mexyl                  | 10.93 | 11.27 | -0.34 |
| Codlure                             | 7.28  | 7.28  | 0.00  |
| Colamine                            | 6.32  | 5.14  | 1.18  |
| Coronene                            | 14.69 | 15.14 | -0.45 |
| Coumaphos                           | 9.5   | 10.15 | -0.65 |
| Coumarin                            | 6.59  | 6.25  | 0.34  |
| Coumatetralyl                       | 13.34 | 13.4  | -0.06 |
| Crotonic acid                       | 5.28  | 5.19  | 0.09  |
| Crotoxyphos                         | 9.55  | 9.29  | 0.26  |
| Cryofluorane                        | 1.29  | 1.42  | -0.13 |
| Cumene                              | 3.98  | 4.03  | -0.05 |
| Cumyluron                           | 13.22 | 13.5  | -0.28 |

|                              |       |       |       |
|------------------------------|-------|-------|-------|
| Cyanazine                    | 9.93  | 9.64  | 0.29  |
| Cyanoethylene                | 2.28  | 2.34  | -0.06 |
| Cycloate                     | 7.36  | 7.5   | -0.14 |
| Cyclododecanol               | 7.62  | 7.07  | 0.55  |
| Cycloheptane                 | 3.49  | 3.35  | 0.14  |
| Cyclohexane                  | 2.71  | 3.08  | -0.37 |
| Cyclohexanol                 | 5.18  | 5.15  | 0.03  |
| Cyclohexanone                | 3.99  | 4.25  | -0.26 |
| Cyclohexene                  | 2.83  | 3.35  | -0.52 |
| Cyclohexylamine              | 5.13  | 4.85  | 0.28  |
| Cyclooctane                  | 3.86  | 3.62  | 0.24  |
| Cyclopentadecanone           | 6.59  | 7.13  | -0.54 |
| Cyclopentane                 | 2.21  | 2.81  | -0.60 |
| Cyclopentanol                | 4.57  | 4.83  | -0.26 |
| Cyclopentanone               | 3.67  | 3.93  | -0.26 |
| Cyclopropane                 | 1.21  | 2.27  | -1.06 |
| Cyenopyrafen                 | 12.24 | 12.37 | -0.13 |
| Cyfluthrin                   | 11.69 | 12.14 | -0.45 |
| Cymperator                   | 11.37 | 12.32 | -0.95 |
| Cyprazine                    | 10.12 | 9.66  | 0.46  |
| Cyproconazole                | 10.32 | 11.18 | -0.86 |
| Cyprodinil                   | 9.37  | 9.47  | -0.10 |
| Cyromazine                   | 10.97 | 10.89 | 0.08  |
| DBCP                         | 4.56  | 4.53  | 0.03  |
| DCPA                         | 8.51  | 9.26  | -0.75 |
| DDD                          | 9.87  | 9.16  | 0.71  |
| DDE                          | 9.24  | 9.28  | -0.04 |
| Decabromodiphenyl ether      | 16.12 | 15.48 | 0.64  |
| Decamethylcyclopentasiloxane | 4.95  | 5.06  | -0.11 |
| Decamethyltetrasiloxane      | 4.64  | 4.56  | 0.08  |
| Decylbenzene                 | 7.43  | 7.12  | 0.31  |
| delta-HCH                    | 8.84  | 8.06  | 0.78  |
| Demeton-S-methyl             | 7.32  | 7.56  | -0.24 |
| Desmedipham                  | 12.86 | 12.94 | -0.08 |
| Desmetryn                    | 9.52  | 10.26 | -0.74 |
| Devrinol                     | 10.62 | 10.72 | -0.10 |
| Diallylamine                 | 4     | 3.64  | 0.36  |
| Dibenz[a,h]anthracene        | 12.59 | 12.26 | 0.33  |
| Dibenzo[b,d]thiophene        | 7.28  | 7.96  | -0.68 |
| Dibenzo[b,e]pyridine         | 8.35  | 8.59  | -0.24 |
| Dibenzofuran                 | 6.59  | 7.14  | -0.55 |
| Dibenzo-p-dioxin             | 6.57  | 7.18  | -0.61 |

|                                   |       |       |       |
|-----------------------------------|-------|-------|-------|
| Dibenzyl ether                    | 6.82  | 7.19  | -0.37 |
| Dibutyl ether                     | 3.89  | 4.09  | -0.20 |
| Dibutyl phthalate                 | 8.66  | 9.18  | -0.52 |
| Dibutylamine                      | 5.17  | 4.92  | 0.25  |
| Dicapthon                         | 8.49  | 7.97  | 0.52  |
| Dichlofenthion                    | 8.03  | 7.75  | 0.28  |
| Dichlorfenidim                    | 10.14 | 9.74  | 0.40  |
| Diclofop-methyl                   | 9.5   | 9.74  | -0.24 |
| Dicofol                           | 11.45 | 11.41 | 0.04  |
| Diethion                          | 10.01 | 9.78  | 0.23  |
| Diethofencarb                     | 10.1  | 8.93  | 1.17  |
| Diethyl adipate                   | 6.3   | 6.36  | -0.06 |
| Diethyl cellosolve                | 3.13  | 3.42  | -0.29 |
| Diethyl malonate                  | 5.01  | 5.07  | -0.06 |
| Diethyl oxalate                   | 4.41  | 4.64  | -0.23 |
| Diethyl phthalate                 | 7.31  | 7.46  | -0.15 |
| Diethyl succinate                 | 5.69  | 5.5   | 0.19  |
| Diethyl sulfate                   | 4.6   | 5.02  | -0.42 |
| Diethyl sulphide                  | 3.01  | 3.34  | -0.33 |
| Diethylamine                      | 3.42  | 3.2   | 0.22  |
| Diethylcarbonate                  | 3.55  | 3.74  | -0.19 |
| Diethylene glycol monohexyl ether | 6.62  | 7.16  | -0.54 |
| Diethyleneglycol dinitrate        | 5.59  | 5.75  | -0.16 |
| Diethyleneglycol monobutyl ether  | 6.81  | 6.3   | 0.51  |
| Diethyleneglycol-di-n-butylether  | 5.79  | 6.19  | -0.40 |
| Diethylketone                     | 3.2   | 3.26  | -0.06 |
| Difenoconazole                    | 13.05 | 12.9  | 0.15  |
| Difenoxyuron                      | 12.95 | 11.92 | 1.03  |
| Diffubenzuron                     | 11.01 | 11.88 | -0.87 |
| Diffumetorim                      | 9.95  | 9.5   | 0.45  |
| Dihexyl phthalate                 | 10.43 | 10.9  | -0.47 |
| Diisoamyl ether                   | 4.58  | 4.37  | 0.21  |
| Diisobutyl ether                  | 3.4   | 3.51  | -0.11 |
| Diisobutylamine                   | 4.64  | 4.34  | 0.30  |
| Diisobutylene                     | 2.79  | 2.71  | 0.08  |
| Diisopropyl ether                 | 2.66  | 2.73  | -0.07 |
| Diisopropyl methylphosphonate     | 5.57  | 5.55  | 0.02  |
| Diisopropyl sulfide               | 3.73  | 3.2   | 0.53  |
| Diisopropylamine                  | 3.68  | 3.4   | 0.28  |
| Dimepiperate                      | 9.75  | 9.65  | 0.10  |
| Dimethachlor                      | 8.94  | 8.3   | 0.64  |
| Dimethametryn                     | 10.17 | 10.34 | -0.17 |

|                                        |       |       |       |
|----------------------------------------|-------|-------|-------|
| Dimethenamid                           | 8.37  | 8.27  | 0.10  |
| Dimethoxymethane                       | 2.39  | 2.38  | 0.01  |
| Dimethyl hexanedioate                  | 5.87  | 5.76  | 0.11  |
| Dimethyl maleate                       | 4.86  | 4.72  | 0.14  |
| Dimethyl malonate                      | 4.68  | 4.47  | 0.21  |
| Dimethyl oxalate                       | 3.52  | 4.04  | -0.52 |
| Dimethyl phthalate                     | 6.8   | 6.86  | -0.06 |
| Dimethyl succinate                     | 4.99  | 4.9   | 0.09  |
| Dimethyl sulfate                       | 4.81  | 4.42  | 0.39  |
| Dimethyl sulfide                       | 2.95  | 2.98  | -0.03 |
| Dimethyl-(2,2-dichlorovinyl) phosphate | 5.95  | 5.24  | 0.71  |
| Dimethylacetamide                      | 5.33  | 4.48  | 0.85  |
| Dimethylamine                          | 2     | 2.36  | -0.36 |
| Dimethylether                          | 1.37  | 1.77  | -0.40 |
| Dimethylterephthalate                  | 6.81  | 6.86  | -0.05 |
| Dimethylvinphos                        | 8.85  | 8.82  | 0.03  |
| Dimoxystrobin                          | 12.65 | 12.25 | 0.40  |
| Dimpylate                              | 7.97  | 8.2   | -0.23 |
| Dinitramine                            | 8.52  | 7.95  | 0.57  |
| Dinoseb                                | 8.05  | 8.41  | -0.36 |
| Di-n-propyl phthalate                  | 7.9   | 8.32  | -0.42 |
| Diofenolan                             | 10.35 | 9.74  | 0.61  |
| Dioxacarb                              | 9.52  | 9.75  | -0.23 |
| Diphenyl 2-ethylhexyl phosphate        | 10.56 | 10.8  | -0.24 |
| Diphenyl ether                         | 6.27  | 6.18  | 0.09  |
| Diphenylamine                          | 7.64  | 7.34  | 0.30  |
| Diphenylcarbonate                      | 6.93  | 7.82  | -0.89 |
| Diphenylmethane                        | 6.11  | 6.18  | -0.07 |
| Diphenylmethanol                       | 8.46  | 8.34  | 0.12  |
| Dipropetryn                            | 9.87  | 10.05 | -0.18 |
| Dipropyl ether                         | 2.97  | 3.23  | -0.26 |
| Dipropylamine                          | 3.59  | 4.06  | -0.47 |
| Disperse Red 1                         | 14.66 | 14.25 | 0.41  |
| Disugran                               | 8.83  | 8.64  | 0.19  |
| Disulfoton                             | 7.82  | 7.46  | 0.36  |
| Dithianon                              | 11.62 | 11.9  | -0.28 |
| Dodecamethylcyclohexasiloxane          | 5.77  | 5.78  | -0.01 |
| Dodecane                               | 4.88  | 5.02  | -0.14 |
| Dyrene                                 | 8.41  | 8.7   | -0.29 |
| Ebufos                                 | 8.12  | 8.24  | -0.12 |
| Eicosane                               | 8.42  | 8.06  | 0.36  |
| Enanthic acid                          | 6.81  | 6.66  | 0.15  |

|                         |       |       |       |
|-------------------------|-------|-------|-------|
| Endosulfan sulfate      | 9.68  | 9.67  | 0.01  |
| Endrin                  | 9.02  | 8.68  | 0.34  |
| endrin aldehyde         | 9.47  | 9.16  | 0.31  |
| Endrin ketone           | 10.11 | 9.69  | 0.42  |
| Enzacamene              | 8.53  | 8.63  | -0.10 |
| Epichlorohydrin         | 3.21  | 3.14  | 0.07  |
| EPN                     | 10.31 | 10.61 | -0.30 |
| epsilon-Caprolactam     | 7.08  | 6.8   | 0.28  |
| Eradicane               | 6.3   | 6.63  | -0.33 |
| Erythritol              | 10.25 | 9.94  | 0.31  |
| Esprocarb               | 8.29  | 8.85  | -0.56 |
| Ethane                  | 0.42  | 1.22  | -0.80 |
| Ethanol                 | 3.2   | 3.34  | -0.14 |
| Ethene                  | 0.28  | 1.02  | -0.74 |
| Ethiofencarb            | 9.12  | 9.64  | -0.52 |
| Ethoxybenzene           | 4.12  | 4.14  | -0.02 |
| Ethychlozate            | 9.85  | 10.31 | -0.46 |
| Ethyl 4-hydroxybenzoate | 8.9   | 7.74  | 1.16  |
| Ethyl acetate           | 2.7   | 2.98  | -0.28 |
| Ethyl acetoacetate      | 4.36  | 4.49  | -0.13 |
| Ethyl acrylate          | 3.12  | 3.2   | -0.08 |
| Ethyl benzoate          | 5.26  | 5.39  | -0.13 |
| Ethyl butanoate         | 3.56  | 3.84  | -0.28 |
| Ethyl ether             | 2.19  | 2.37  | -0.18 |
| Ethyl formate           | 2.19  | 2.24  | -0.05 |
| Ethyl hexanoate         | 4.42  | 4.7   | -0.28 |
| Ethyl iodide            | 2.59  | 2.52  | 0.07  |
| Ethyl methacrylate      | 3.34  | 3.59  | -0.25 |
| Ethyl methyl sulfide    | 2.61  | 3.16  | -0.55 |
| Ethyl propanoate        | 3.15  | 3.41  | -0.26 |
| Ethyl t-butyl ether     | 2.69  | 2.73  | -0.04 |
| Ethyl trans-cinnamate   | 6.67  | 6.07  | 0.60  |
| Ethyl vanillin          | 7.49  | 7.97  | -0.48 |
| Ethyl vinyl ether       | 1.71  | 1.61  | 0.10  |
| Ethylamine              | 2.96  | 3.12  | -0.16 |
| Ethylbenzene            | 3.72  | 3.92  | -0.20 |
| Ethylcyclohexane        | 3.57  | 3.55  | 0.02  |
| Ethylene dodecanedioate | 7.75  | 7.76  | -0.01 |
| Ethylenediamine         | 4.49  | 4.92  | -0.43 |
| Ethylenedichloride      | 2.78  | 2.88  | -0.10 |
| Ethylpyrazine           | 4.48  | 5.17  | -0.69 |
| Ethyne                  | 0.33  | 0.5   | -0.17 |

|                      |       |       |       |
|----------------------|-------|-------|-------|
| Ethynylbenzene       | 4.11  | 3.78  | 0.33  |
| Etofenprox           | 12.48 | 11.46 | 1.02  |
| Etohexadiol          | 6.65  | 7.46  | -0.81 |
| Etoxazole            | 11.53 | 11.68 | -0.15 |
| Etrimfos             | 8.07  | 7.91  | 0.16  |
| Fenamidone           | 10.87 | 11.2  | -0.33 |
| Fenazaquin           | 10.29 | 10.75 | -0.46 |
| Fenbuconazole        | 10.91 | 11.11 | -0.20 |
| Fenchlorphos         | 7.61  | 7.75  | -0.14 |
| Fenchol              | 6.06  | 5.96  | 0.10  |
| Fenclorim            | 7.32  | 7.76  | -0.44 |
| Fenhexamid           | 11.77 | 12.78 | -1.01 |
| Fenobucarb           | 8.19  | 8.62  | -0.43 |
| Fenothiocarb         | 9.24  | 8.61  | 0.63  |
| Fenoxycarb           | 11.93 | 11.27 | 0.66  |
| Fenpiclonil          | 10.37 | 9.61  | 0.76  |
| Fenpropidin          | 9.38  | 8.72  | 0.66  |
| Fenpropimorph        | 8.69  | 8.84  | -0.15 |
| Fenpyroximate        | 9.32  | 9.17  | 0.15  |
| Fenthion             | 8.2   | 7.77  | 0.43  |
| Fenthoate            | 8.54  | 8.84  | -0.30 |
| Fentrazamide         | 11.48 | 11.38 | 0.10  |
| Fenvalerate          | 12.98 | 13.38 | -0.40 |
| Ferimzone            | 10.88 | 10.78 | 0.10  |
| Flamprop-M-isopropyl | 9.71  | 10.72 | -1.01 |
| Flamprop-M-methyl    | 9.54  | 10.24 | -0.70 |
| Flonicamid           | 10.26 | 9.79  | 0.47  |
| Fluacrypyrim         | 10.15 | 10.74 | -0.59 |
| Fluazifop-butyl      | 10.3  | 10.5  | -0.20 |
| Flucythrinate        | 12.09 | 12.85 | -0.76 |
| Flufenoxuron         | 14.74 | 14.98 | -0.24 |
| Fluometuron          | 9.12  | 8.96  | 0.16  |
| Fluopyram            | 10.99 | 11.01 | -0.02 |
| Fluoranthene         | 8.88  | 9.02  | -0.14 |
| Fluorene             | 6.9   | 7.14  | -0.24 |
| Fluoroacetone        | 2.35  | 1.7   | 0.65  |
| Fluorobenzene        | 2.84  | 3.14  | -0.30 |
| Fluquinconazole      | 11.58 | 12.05 | -0.47 |
| Fluridone            | 9.81  | 10.04 | -0.23 |
| Flurochloridone      | 9.01  | 8.74  | 0.27  |
| Flurprimidol         | 10.41 | 10.7  | -0.29 |
| Flusulfamide         | 10.74 | 10.48 | 0.26  |



|                            |       |       |       |
|----------------------------|-------|-------|-------|
| Fluthiamide                | 9.27  | 9.83  | -0.56 |
| Flutolanil                 | 11.28 | 10.84 | 0.44  |
| Flutriafol                 | 10.59 | 10.82 | -0.23 |
| Fluxapyroxad               | 12.22 | 12.31 | -0.09 |
| Fluxofenim                 | 7.4   | 7.49  | -0.09 |
| Folbex                     | 11.73 | 12.22 | -0.49 |
| Forchlorfenuron            | 12.85 | 12.11 | 0.74  |
| Formaldehyde diethylacetal | 3.29  | 2.98  | 0.31  |
| Formic acid                | 4.06  | 3.77  | 0.29  |
| Formothion                 | 7.85  | 8.42  | -0.57 |
| Furalaxyl                  | 9.66  | 9.76  | -0.10 |
| Furan                      | 1.95  | 2.18  | -0.23 |
| Furfural                   | 3.96  | 3.92  | 0.04  |
| Fyrol FR-2                 | 10.6  | 10.79 | -0.19 |
| gamma-Terpinene            | 4.28  | 4.73  | -0.45 |
| Glycerol trinitrate        | 6.87  | 6.57  | 0.30  |
| Glyceryltriacetate         | 6.42  | 6.48  | -0.06 |
| Glycidyl butyl ether       | 3.44  | 4.27  | -0.83 |
| Glyme                      | 3.12  | 2.82  | 0.30  |
| Guajen                     | 6.51  | 6.18  | 0.33  |
| Haloxyfop-etotyl           | 12.14 | 11.29 | 0.85  |
| Haloxyfop-P-methyl         | 9.29  | 9.94  | -0.65 |
| Harmony                    | 13.84 | 13.67 | 0.17  |
| Hemimellitene              | 4.61  | 4.28  | 0.33  |
| Heptachlor                 | 7.7   | 8.19  | -0.49 |
| Heptachlor epoxide         | 8.62  | 8.51  | 0.11  |
| Heptane                    | 2.93  | 3.12  | -0.19 |
| Heptanedioic acid          | 10.69 | 11.05 | -0.36 |
| Heptenophos                | 7.5   | 7.74  | -0.24 |
| Heptyl bromide             | 4.26  | 4.59  | -0.33 |
| Heptylbenzene              | 6.3   | 5.92  | 0.38  |
| Heroine                    | 11.79 | 12.74 | -0.95 |
| Hexabromobenzene           | 9.53  | 8.9   | 0.63  |
| Hexachlorobenzene          | 7.55  | 6.92  | 0.63  |
| Hexachlorobutadiene        | 4.58  | 4.98  | -0.40 |
| Hexachloroethane           | 4.47  | 4.7   | -0.23 |
| Hexaconazole               | 10.79 | 11.26 | -0.47 |
| Hexaflumuron               | 13.09 | 13.44 | -0.35 |
| Hexafluoro-2-propanol      | 4.34  | 3.54  | 0.80  |
| Hexafluorobenzene          | 2.11  | 2.24  | -0.13 |
| Hexamethylbenzene          | 6.31  | 5.42  | 0.89  |
| Hexamethyldisiloxane       | 2.71  | 2.68  | 0.03  |

|                                        |       |       |       |
|----------------------------------------|-------|-------|-------|
| Hexane                                 | 2.4   | 2.74  | -0.34 |
| Hexanenitrile                          | 4.08  | 3.84  | 0.24  |
| Hexazinone                             | 11.07 | 10.95 | 0.12  |
| Hexyl bromide                          | 3.77  | 4.16  | -0.39 |
| Hexylbenzene                           | 5.83  | 5.52  | 0.31  |
| Hydrocinnamyl alcohol                  | 6.79  | 6.61  | 0.18  |
| Hydroxyacetic acid                     | 6.08  | 6.53  | -0.45 |
| Imibenconazole                         | 12.92 | 12.74 | 0.18  |
| Imiprothrin                            | 11.24 | 11.71 | -0.47 |
| Indane                                 | 4.28  | 5.08  | -0.80 |
| Indanofan                              | 11.06 | 12.12 | -1.06 |
| Indeno[1,2,3-cd]pyrene                 | 12.43 | 13.02 | -0.59 |
| Indole                                 | 6.95  | 6.36  | 0.59  |
| Indoxacarb                             | 14.14 | 14.01 | 0.13  |
| Iodobenzene                            | 4.55  | 5.15  | -0.60 |
| Ioxynil                                | 11.31 | 10.54 | 0.77  |
| Ipconazole                             | 11.06 | 11.96 | -0.90 |
| Isazofos                               | 8.11  | 8.21  | -0.10 |
| Isoamyl acetate                        | 3.94  | 3.98  | -0.04 |
| Isobutene                              | 1.46  | 1.81  | -0.35 |
| Isobutyl acetate                       | 3.45  | 3.55  | -0.10 |
| Isobutyl acrylate                      | 3.71  | 3.77  | -0.06 |
| Isobutyl methacrylate                  | 4.31  | 4.16  | 0.15  |
| Isobutyl methyl ketone                 | 3.3   | 3.4   | -0.10 |
| Isobutylbenzene                        | 4.01  | 4.43  | -0.42 |
| Isobutyronitrile                       | 2.87  | 2.69  | 0.18  |
| Isocumene                              | 4.09  | 4.32  | -0.23 |
| Isofenphos                             | 9.63  | 9.58  | 0.05  |
| Isoprene                               | 2.06  | 2     | 0.06  |
| Isoprocab                              | 8.02  | 8.19  | -0.17 |
| Isopropazol                            | 9.67  | 10.25 | -0.58 |
| Isopropyl (2,4-dichlorophenoxy)acetate | 6.21  | 7.18  | -0.97 |
| Isopropyl propionate                   | 3.16  | 3.59  | -0.43 |
| Isopropylacetate                       | 2.93  | 3.16  | -0.23 |
| Isoproturon                            | 10.18 | 9.52  | 0.66  |
| Isopyrazam (syn form)                  | 13.95 | 13.72 | 0.23  |
| Isoquinoline                           | 6.16  | 6.39  | -0.23 |
| Isouron                                | 9.51  | 9.87  | -0.36 |
| Isoxathion                             | 8.48  | 8.31  | 0.17  |
| Isoxazole                              | 2.9   | 2.55  | 0.35  |
| Jodfenphos                             | 9.09  | 8.98  | 0.11  |
| Kappa-Tefluthrin                       | 7.79  | 7.59  | 0.20  |

|                            |       |       |       |
|----------------------------|-------|-------|-------|
| Karbutilate                | 12.88 | 12.9  | -0.02 |
| Kitazin                    | 8.98  | 8.91  | 0.07  |
| Kresoxim-methyl            | 9.84  | 9.45  | 0.39  |
| KTU3616                    | 10.44 | 11.24 | -0.80 |
| lambda-Cyhalothrin         | 12.11 | 11.74 | 0.37  |
| Lenacil                    | 12.21 | 12.05 | 0.16  |
| Leptophos                  | 11.31 | 11.02 | 0.29  |
| Limonene oxide             | 5.75  | 4.78  | 0.97  |
| Linalool                   | 5.97  | 5.85  | 0.12  |
| Lindane                    | 7.48  | 8.06  | -0.58 |
| L-Menthone                 | 5.18  | 5.1   | 0.08  |
| Lysodren                   | 9.57  | 9.16  | 0.41  |
| Malic acid                 | 9.9   | 10.02 | -0.12 |
| m-Anisidine                | 6.07  | 5.9   | 0.17  |
| m-Anthranilic acid         | 9.89  | 8.98  | 0.91  |
| m-Cresol                   | 6.28  | 6.08  | 0.20  |
| Mecoprop                   | 9.74  | 8.52  | 1.22  |
| Mefenacet                  | 10.29 | 10.46 | -0.17 |
| Menthol                    | 6.08  | 6     | 0.08  |
| Mepanipirim                | 9.38  | 9.57  | -0.19 |
| Meptyldinocap              | 12.17 | 11.67 | 0.50  |
| Mercaptodimethur           | 9.71  | 9.44  | 0.27  |
| Metalaxyl                  | 9.28  | 8.98  | 0.30  |
| Metamitron                 | 10.85 | 10.53 | 0.32  |
| Metconazole                | 10.57 | 11.41 | -0.84 |
| Methacrylamide             | 6.74  | 5.66  | 1.08  |
| Methanol                   | 2.84  | 3.04  | -0.20 |
| Methibenzuron              | 10.04 | 10.13 | -0.09 |
| Methidathion               | 8.74  | 8     | 0.74  |
| Methoprotetryne            | 10.63 | 10.95 | -0.32 |
| Methoxychlor               | 10.57 | 9.44  | 1.13  |
| Methoxyflurane             | 3.03  | 3.77  | -0.74 |
| Methyl (Z) 9-octadecenoate | 9.59  | 9.38  | 0.21  |
| Methyl 2-hydroxybenzoate   | 5.86  | 5.93  | -0.07 |
| Methyl 4-hydroxybenzoate   | 8.57  | 7.44  | 1.13  |
| Methyl acetate             | 2.31  | 2.68  | -0.37 |
| Methyl acrylate            | 2.8   | 2.9   | -0.10 |
| Methyl benzoate            | 4.92  | 5.09  | -0.17 |
| Methyl cellosolve          | 3.76  | 4.09  | -0.33 |
| Methyl decanoate           | 5.94  | 6.12  | -0.18 |
| Methyl formate             | 1.75  | 1.94  | -0.19 |
| Methyl hexanoate           | 4.22  | 4.4   | -0.18 |

|                         |       |       |       |
|-------------------------|-------|-------|-------|
| Methyl isoamyl ketone   | 3.97  | 3.83  | 0.14  |
| Methyl laurate          | 6.84  | 6.98  | -0.14 |
| Methyl methacrylate     | 3.08  | 3.29  | -0.21 |
| Methyl pivalate         | 3.55  | 3.27  | 0.28  |
| Methyl propanoate       | 2.9   | 3.11  | -0.21 |
| Methyl t-pentyl ether   | 2.98  | 2.86  | 0.12  |
| Methyl trifluoroacetate | 1.58  | 2.69  | -1.11 |
| Methyl valerate         | 3.8   | 3.97  | -0.17 |
| Methylacetamide         | 5.4   | 5.07  | 0.33  |
| Methylamine             | 2.55  | 2.7   | -0.15 |
| Methylbenzene           | 3.31  | 3.52  | -0.21 |
| Methylchloroform        | 2.7   | 3.01  | -0.31 |
| Methylcyanoacetate      | 4.17  | 3.91  | 0.26  |
| Methylcyclohexane       | 3.03  | 3.17  | -0.14 |
| Methylcyclopentane      | 2.35  | 2.9   | -0.55 |
| Methylcyclopropylketone | 3.71  | 3.64  | 0.07  |
| Methylnitrophos         | 7.62  | 7.78  | -0.16 |
| Methyl-n-propylketone   | 3.19  | 3.26  | -0.07 |
| Methyloxiran            | 2.36  | 2.36  | 0.00  |
| Methylparathion         | 7.34  | 7.37  | -0.03 |
| Methylpropylether       | 2.49  | 2.5   | -0.01 |
| Metofluthrin            | 8.54  | 8.05  | 0.49  |
| Metolachlor             | 9.37  | 8.83  | 0.54  |
| Metolcarb               | 6.71  | 7.62  | -0.91 |
| Metominostrobin         | 9.85  | 9.55  | 0.30  |
| Metoxuron               | 10.35 | 9.66  | 0.69  |
| Metribuzin              | 9.15  | 8.65  | 0.50  |
| Metsulfovax             | 10.08 | 10.44 | -0.36 |
| Metsulfuron-methyl      | 13.82 | 14.25 | -0.43 |
| Milbemectin A3          | 17.15 | 17.24 | -0.09 |
| Mocap                   | 8.51  | 8.38  | 0.13  |
| Molinate                | 7.06  | 6.86  | 0.20  |
| Monalide                | 9.71  | 9.06  | 0.65  |
| Monocrotophos           | 9.37  | 8.79  | 0.58  |
| Morpholine              | 4.04  | 3.73  | 0.31  |
| Moskene                 | 8.31  | 8.92  | -0.61 |
| MTBE                    | 2.48  | 2.43  | 0.05  |
| m-Toluidine             | 5.42  | 5.79  | -0.37 |
| Musk ketone             | 8.77  | 9.47  | -0.70 |
| Musk tebetine           | 8.3   | 8.39  | -0.09 |
| Musk xylene             | 8.24  | 9.4   | -1.16 |
| Myclobutanil            | 9.51  | 9.67  | -0.16 |

|                                       |      |      |       |
|---------------------------------------|------|------|-------|
| Myrcene                               | 4.08 | 3.78 | 0.30  |
| Myristyl alcohol                      | 8.49 | 8.5  | -0.01 |
| N,N-Diethylaniline                    | 5.56 | 5.65 | -0.09 |
| N,N-Dimethylaniline                   | 4.78 | 4.81 | -0.03 |
| N,N-Dimethylbenzylamine               | 5    | 5.11 | -0.11 |
| N,N-Dimethylformamide                 | 4.38 | 4.18 | 0.20  |
| N,N-Dimethyl-p-toluidine              | 5.46 | 5.22 | 0.24  |
| n-Amyl ether                          | 4.8  | 4.95 | -0.15 |
| Naphthalene                           | 5.37 | 5.42 | -0.05 |
| n-Butyl acetate                       | 3.65 | 3.84 | -0.19 |
| n-Butyl acrylate                      | 4.05 | 4.06 | -0.01 |
| n-Butyl methyl ether                  | 2.77 | 2.93 | -0.16 |
| n-Butylbenzoate                       | 6.25 | 6.25 | 0.00  |
| n-Butylmethacrylate                   | 4.41 | 4.45 | -0.04 |
| n-Decanoic acid                       | 8.31 | 7.95 | 0.36  |
| n-Decyl alcohol                       | 6.81 | 6.78 | 0.03  |
| Neohexane                             | 2.09 | 2.04 | 0.05  |
| Neopentyl alcohol                     | 4.06 | 3.93 | 0.13  |
| Neral                                 | 5.43 | 5.39 | 0.04  |
| N-Ethylaniline                        | 5.46 | 5.82 | -0.36 |
| n-Heptaldehyde                        | 4.74 | 4.54 | 0.20  |
| n-Heptylamine                         | 5.29 | 5.27 | 0.02  |
| n-Hexanoic acid                       | 6.31 | 6.23 | 0.08  |
| n-Hexylacetate                        | 4.58 | 4.7  | -0.12 |
| n-Hexylamine                          | 4.88 | 4.84 | 0.04  |
| Niclofen                              | 8.57 | 8.8  | -0.23 |
| Nitrobenzene                          | 4.58 | 4.74 | -0.16 |
| Nitroethane                           | 2.88 | 2.67 | 0.21  |
| N-Methyl-2-pyrrolidone                | 6.13 | 5.57 | 0.56  |
| N-Methyl-3,5-dimethylphenyl carbamate | 8.06 | 8.03 | 0.03  |
| N-Methylaniline                       | 4.99 | 5.4  | -0.41 |
| N-Methylformamide                     | 5.17 | 4.77 | 0.40  |
| N-Methylmorpholine                    | 3.77 | 3.65 | 0.12  |
| N-Methylpiperidine                    | 4.05 | 3.89 | 0.16  |
| N-Methylpyrrole                       | 3.28 | 2.94 | 0.34  |
| N-Methylpyrrolidine                   | 3.64 | 3.57 | 0.07  |
| N-Nitrosodibutylamine                 | 5.81 | 6.3  | -0.49 |
| N-Nitrosodiethylamine                 | 4.04 | 4.58 | -0.54 |
| N-Nitrosodiisopropylamine             | 5.36 | 4.78 | 0.58  |
| N-Nitrosodimethylamine                | 3.72 | 3.74 | -0.02 |
| N-Nitrosodipropylamine                | 5.57 | 5.44 | 0.13  |
| N-Nitrosoethylbutylamine              | 5.46 | 5.44 | 0.02  |

|                                                    |       |       |       |
|----------------------------------------------------|-------|-------|-------|
| N-Nitrosohexamethyleneimine                        | 6.16  | 5.67  | 0.49  |
| N-Nitrosomorpholine                                | 5.56  | 5.11  | 0.45  |
| N-Nitroso-N-methylethylamine                       | 3.85  | 4.16  | -0.31 |
| N-Nitroso-N-methyl-N-butylamine                    | 4.3   | 5.02  | -0.72 |
| N-Nitrosopiperidine                                | 5.19  | 5.35  | -0.16 |
| N-Nitrosopyrrolidine                               | 5.64  | 5.03  | 0.61  |
| n-Octanoic acid                                    | 7.38  | 7.09  | 0.29  |
| n-Octylamine                                       | 5.73  | 5.7   | 0.03  |
| Nonane                                             | 3.9   | 3.88  | 0.02  |
| Nopinene                                           | 3.68  | 4.27  | -0.59 |
| Norflurazon                                        | 10.7  | 10.91 | -0.21 |
| n-Propyl acetate                                   | 3.17  | 3.41  | -0.24 |
| n-Propyl iodide                                    | 2.96  | 2.95  | 0.01  |
| n-Propylformate                                    | 2.66  | 2.67  | -0.01 |
| O,O-Dimethyl-S-[2-(ethylthio)ethyl]dithiophosphate | 7.52  | 6.86  | 0.66  |
| o-Anthranilic acid                                 | 8.16  | 7.47  | 0.69  |
| o-Cresol                                           | 6.11  | 6.08  | 0.03  |
| Octachlorodibenzofuran                             | 11.9  | 11.94 | -0.04 |
| Octachlorodibenzo-p-dioxin                         | 13.31 | 11.98 | 1.33  |
| Octachloronaphthalene                              | 11.48 | 10.52 | 0.96  |
| Octadecane                                         | 7.87  | 7.3   | 0.57  |
| Octafluoronaphthalene                              | 4.7   | 4.28  | 0.42  |
| Octamethylcyclotetrasiloxane                       | 4.22  | 4.34  | -0.12 |
| Octamethyltrisiloxane                              | 3.75  | 3.62  | 0.13  |
| Octane                                             | 3.3   | 3.5   | -0.20 |
| Octylbenzene                                       | 6.42  | 6.32  | 0.10  |
| Octylcyanide                                       | 5.11  | 5.13  | -0.02 |
| Ofurace                                            | 8.57  | 9.55  | -0.98 |
| Orbencarb                                          | 8.82  | 8.78  | 0.04  |
| Orysastrobin                                       | 10.92 | 11.07 | -0.15 |
| o-Toluidine                                        | 4.66  | 5.79  | -1.13 |
| Oxabetrinil                                        | 7.94  | 7.68  | 0.26  |
| Oxadiargyl                                         | 9.86  | 9.72  | 0.14  |
| Oxadiazon                                          | 9.42  | 9.61  | -0.19 |
| Oxirane                                            | 1.82  | 2.18  | -0.36 |
| Oxyfluorfen                                        | 9.21  | 9.44  | -0.23 |
| Paclobutrazol                                      | 10.85 | 10.31 | 0.54  |
| p-Anthranilic acid                                 | 9.46  | 8.98  | 0.48  |
| Paraoxon                                           | 8.79  | 8.46  | 0.33  |
| p-Benzidine                                        | 10.29 | 10.26 | 0.03  |
| PCNB                                               | 8.48  | 7.74  | 0.74  |
| p-Cresol                                           | 6.3   | 6.08  | 0.22  |

|                             |       |       |       |
|-----------------------------|-------|-------|-------|
| p-Cresyl diphenyl phosphate | 10.6  | 10.39 | 0.21  |
| p-Cymene                    | 4.54  | 4.41  | 0.13  |
| Pebulate                    | 6.83  | 7.06  | -0.23 |
| Pelargonic acid             | 7.52  | 7.52  | 0.00  |
| Penconazole                 | 9.81  | 9.02  | 0.79  |
| Pencycuron                  | 13.91 | 13.8  | 0.11  |
| Penfenate                   | 9     | 8.46  | 0.54  |
| Penoxalin                   | 8.66  | 8.93  | -0.27 |
| Penoxsulam                  | 13.53 | 13.3  | 0.23  |
| Pentabromoanisole           | 9.01  | 8.49  | 0.52  |
| Pentabromobenzene           | 8.3   | 7.97  | 0.33  |
| Pentabromotoluene           | 9.61  | 8.38  | 1.23  |
| Pentachloroanisole          | 6.65  | 6.84  | -0.19 |
| Pentachlorobenzene          | 6.75  | 6.32  | 0.43  |
| Pentachloroethane           | 4.38  | 4.26  | 0.12  |
| Pentachlorophenol           | 9.01  | 8.67  | 0.34  |
| Pentachlorotoluene          | 7.25  | 6.73  | 0.52  |
| Pentafluorobenzene          | 2.54  | 2.42  | 0.12  |
| Pentafluorophenol           | 4.42  | 4.77  | -0.35 |
| Pentamethylbenzene          | 6.12  | 5.04  | 1.08  |
| Pentane                     | 1.95  | 2.36  | -0.41 |
| Pentanedioic acid           | 9.88  | 10.19 | -0.31 |
| Pentanenitrile              | 3.6   | 3.41  | 0.19  |
| Pentanoic acid              | 5.94  | 5.8   | 0.14  |
| Perchlordecone              | 9.12  | 9.36  | -0.24 |
| Perchlorobiphenyl           | 11.61 | 12.14 | -0.53 |
| Perchlorocyclopentadiene    | 5.42  | 5.18  | 0.24  |
| Perfluorobiphenyl           | 4.97  | 4.34  | 0.63  |
| Perylene                    | 11.7  | 11.7  | 0.00  |
| Pethoxamid                  | 8.91  | 9.48  | -0.57 |
| Phantolide                  | 7.76  | 7.71  | 0.05  |
| Phenanthrene                | 7.62  | 7.7   | -0.08 |
| Phenanthridine              | 9.55  | 8.69  | 0.86  |
| Phenethyl alcohol           | 6.16  | 6.18  | -0.02 |
| Phenmedipham                | 13.4  | 13.05 | 0.35  |
| Phenol                      | 6.06  | 5.67  | 0.39  |
| Phenothrin                  | 11.7  | 10.86 | 0.84  |
| Phenylacetonitrile          | 4.99  | 4.96  | 0.03  |
| Phenylhydrazine             | 7.71  | 7.95  | -0.24 |
| Phenylmethanol              | 5.78  | 5.75  | 0.03  |
| Phlorol                     | 6.49  | 6.51  | -0.02 |
| Phosphamide                 | 8.27  | 8.59  | -0.32 |

|                        |       |       |       |
|------------------------|-------|-------|-------|
| Phthalic anhydride     | 7.54  | 6.82  | 0.72  |
| Phthalide              | 7.75  | 8.23  | -0.48 |
| Phthalthrin            | 12.14 | 12.15 | -0.01 |
| Picoxystrobin          | 10.05 | 9.63  | 0.42  |
| p-Imazamethabenzmethyl | 10.78 | 10.86 | -0.08 |
| Pinacolone             | 3.24  | 2.99  | 0.25  |
| Pinoxaden              | 12.34 | 12.44 | -0.10 |
| Piperazine             | 3.77  | 4.56  | -0.79 |
| Piperidine             | 4.04  | 3.97  | 0.07  |
| Piperophos             | 10.54 | 11.17 | -0.63 |
| Pirimicarb             | 8.9   | 9.04  | -0.14 |
| Pirimiphos-ethyl       | 9.39  | 9.4   | -0.01 |
| Pirimiphos-methyl      | 9.05  | 8.8   | 0.25  |
| Plinol                 | 5.88  | 5.9   | -0.02 |
| p-Menthane             | 4.06  | 3.73  | 0.33  |
| Preforan               | 9.64  | 9.44  | 0.20  |
| Prehnitene             | 4.4   | 4.66  | -0.26 |
| Pretilachlor           | 9.93  | 9.89  | 0.04  |
| Prochloraz             | 10.16 | 10.8  | -0.64 |
| Procymidone            | 8.98  | 8.65  | 0.33  |
| Profenofos             | 10.1  | 9.57  | 0.53  |
| Promecarb              | 8.4   | 8.6   | -0.20 |
| Prometon               | 9.71  | 9.27  | 0.44  |
| Prometryn              | 9.84  | 9.87  | -0.03 |
| Pronamide              | 9.66  | 9.44  | 0.22  |
| Propachlor             | 7.36  | 6.83  | 0.53  |
| Propafos               | 9.22  | 9.31  | -0.09 |
| Propamocarb            | 8.07  | 7.83  | 0.24  |
| Propanal               | 3.02  | 2.82  | 0.20  |
| Propanamide            | 5.85  | 5.48  | 0.37  |
| Propandioic acid       | 8.81  | 7.82  | 0.99  |
| Propane                | 0.97  | 1.6   | -0.63 |
| Propanenitrile         | 2.69  | 2.55  | 0.14  |
| Propanoic acid         | 4.85  | 4.94  | -0.09 |
| Propanone              | 2.36  | 2.4   | -0.04 |
| Propaquizafop          | 14.29 | 13.71 | 0.58  |
| Propazine              | 9.02  | 8.99  | 0.03  |
| Propenal               | 2.6   | 2.61  | -0.01 |
| Propham                | 7.33  | 7.29  | 0.04  |
| Propiconazole          | 10.75 | 10.9  | -0.15 |
| Propisochlor           | 8.53  | 8.55  | -0.02 |
| Propoxur               | 8.32  | 8.21  | 0.11  |



|                                             |       |       |       |
|---------------------------------------------|-------|-------|-------|
| Propyl 2-hexyl-3-oxocyclopentanecarboxylate | 8.59  | 8.45  | 0.14  |
| Propyl 4-hydroxybenzoate                    | 9.48  | 8.17  | 1.31  |
| Propyl butyrate                             | 3.79  | 4.27  | -0.48 |
| Propylene                                   | 0.92  | 1.45  | -0.53 |
| Propylenecarbonate                          | 4.81  | 3.73  | 1.08  |
| Propyleneglycol-1-monomethylether-2-acetate | 4.16  | 3.91  | 0.25  |
| Propyne                                     | 1.15  | 1.52  | -0.37 |
| Proquinazid                                 | 10.43 | 10.72 | -0.29 |
| Prosulfocarb                                | 8.74  | 9.04  | -0.30 |
| Prothiofos                                  | 8.78  | 8.54  | 0.24  |
| Pseudococaine                               | 10.58 | 10.08 | 0.50  |
| p-Toluidine                                 | 5.31  | 5.79  | -0.48 |
| Pulegone                                    | 5.87  | 5.53  | 0.34  |
| Pyraclofos                                  | 11.32 | 11.27 | 0.05  |
| Pyrasulfotole                               | 10.47 | 10.55 | -0.08 |
| Pyrene                                      | 8.83  | 9.42  | -0.59 |
| Pyridalyl                                   | 12.64 | 11.76 | 0.88  |
| Pyridaphenthion                             | 10.93 | 11.06 | -0.13 |
| Pyridine                                    | 3.91  | 3.99  | -0.08 |
| Pyrifenox                                   | 9.33  | 9.16  | 0.17  |
| Pyriktalid                                  | 11.11 | 10.64 | 0.47  |
| Pyrimethanil                                | 8.43  | 8.23  | 0.20  |
| Pyriminobac-methyl                          | 9.53  | 10.32 | -0.79 |
| Pyroquilon                                  | 8.42  | 8.01  | 0.41  |
| Pyrrole                                     | 3.77  | 4.42  | -0.65 |
| Pyrrolidine                                 | 4.07  | 3.65  | 0.42  |
| Pyruvic acid                                | 5.16  | 5.59  | -0.43 |
| Quinalphos                                  | 9.8   | 9.8   | 0.00  |
| Quinoclamine                                | 9.39  | 9.68  | -0.29 |
| Quinoline                                   | 6.06  | 6.29  | -0.23 |
| Quinoxifen                                  | 9.37  | 10.17 | -0.80 |
| Radox                                       | 6.56  | 7.01  | -0.45 |
| Resmethrin                                  | 11.19 | 10.35 | 0.84  |
| Sabinene                                    | 4.39  | 4.38  | 0.01  |
| Salicylic acid                              | 7.44  | 7.76  | -0.32 |
| s-Butylacetate                              | 3.32  | 3.59  | -0.27 |
| s-Butylbenzene                              | 4.2   | 4.43  | -0.23 |
| Sebuthylazine                               | 8.74  | 9.32  | -0.58 |
| Secbumeton                                  | 8.99  | 9.6   | -0.61 |
| Sethoxydim                                  | 11.21 | 11.35 | -0.14 |
| Siduron                                     | 12.13 | 11.42 | 0.71  |
| Simazine                                    | 8.81  | 8.79  | 0.02  |

|                       |       |       |       |
|-----------------------|-------|-------|-------|
| Simeconazole          | 10    | 9.99  | 0.01  |
| Simeton               | 9.35  | 9.07  | 0.28  |
| Simetryn              | 9.86  | 9.67  | 0.19  |
| Sorbic acid           | 7.11  | 5.87  | 1.24  |
| Sorbitol              | 14.28 | 14.46 | -0.18 |
| Spiroxamine           | 8.57  | 8.78  | -0.21 |
| Stirofos              | 10.13 | 10.42 | -0.29 |
| s-trans-1,3-Butadiene | 1.62  | 1.64  | -0.02 |
| Styrene               | 3.93  | 3.71  | 0.22  |
| Styrene oxide         | 4.54  | 4.77  | -0.23 |
| Sulfometuron          | 15.41 | 15.66 | -0.25 |
| Sulprofos             | 9.42  | 8.75  | 0.67  |
| t-Butylacetate        | 3.26  | 3.34  | -0.08 |
| t-Butylbenzene        | 4.18  | 4.02  | 0.16  |
| Tebuconazole          | 11.41 | 10.82 | 0.59  |
| Tebupirimfos          | 8.72  | 8.61  | 0.11  |
| Tebuthiuron           | 9.47  | 9.32  | 0.15  |
| Tedion                | 8.54  | 8.71  | -0.17 |
| Teflubenzuron         | 11.14 | 12.12 | -0.98 |
| Teproloxydim          | 10.28 | 11.35 | -1.07 |
| Terbacil              | 9.76  | 9.05  | 0.71  |
| Terbufos              | 7.97  | 8.38  | -0.41 |
| Terbumeton            | 9.35  | 9.12  | 0.23  |
| Terbutylazine         | 8.92  | 8.84  | 0.08  |
| Terbutryne            | 9.9   | 9.72  | 0.18  |
| Terpinolene           | 4.59  | 4.87  | -0.28 |
| Tetrabromobisphenol A | 14.83 | 15.15 | -0.32 |
| Tetrachlorocatechol   | 9.09  | 10.42 | -1.33 |
| Tetrachloroethylene   | 3.48  | 3.74  | -0.26 |
| Tetrachloroveratrole  | 7.31  | 6.76  | 0.55  |
| Tetraconazole         | 9.97  | 9.55  | 0.42  |
| Tetradecane           | 6.11  | 5.78  | 0.33  |
| Tetradisul            | 10.09 | 9.4   | 0.69  |
| Tetrahydrofuran       | 2.86  | 2.82  | 0.04  |
| Tetrahydropyran       | 3.22  | 3.14  | 0.08  |
| Tetramethylene glycol | 6.65  | 6.28  | 0.37  |
| Tetramethylsilane     | 1.81  | 1.81  | 0.00  |
| Thenylchlor           | 9.85  | 10.07 | -0.22 |
| Thi fluzamide         | 13.4  | 12.45 | 0.95  |
| Thimet                | 7.54  | 7.68  | -0.14 |
| Thioanisoie           | 4.71  | 4.73  | -0.02 |
| Thiobencarb           | 8.92  | 8.78  | 0.14  |

|                                   |       |       |       |
|-----------------------------------|-------|-------|-------|
| Thiofanocarb                      | 8.98  | 8.64  | 0.34  |
| Thiophene                         | 2.91  | 2.8   | 0.11  |
| Thiophos                          | 8.23  | 7.97  | 0.26  |
| Thioxamyl                         | 9.8   | 10.19 | -0.39 |
| TNT                               | 7.53  | 7.99  | -0.46 |
| Tolclofos-methyl                  | 7.83  | 7.56  | 0.27  |
| Tonalide                          | 8.24  | 8.03  | 0.21  |
| Tralkoxydim                       | 11.89 | 12.18 | -0.29 |
| trans-1,2-Cycloheptyl dinitrate   | 6.7   | 6.58  | 0.12  |
| trans-1,2-Cyclohexyl dinitrate    | 5.66  | 6.26  | -0.60 |
| trans-1,2-Dichloroethylene        | 2.73  | 2.34  | 0.39  |
| trans-1,3-Cyclohexyl dinitrate    | 6.05  | 6.26  | -0.21 |
| trans-1,3-Dichloropropene         | 3.28  | 2.95  | 0.33  |
| trans-1,4-Dichloro-2-butene       | 4.15  | 3.56  | 0.59  |
| trans-2,5-Dimethyltetrahydrofuran | 3.41  | 3.18  | 0.23  |
| trans-2-Butene                    | 1.42  | 1.88  | -0.46 |
| trans-2-Methylcyclohexanol        | 5.22  | 5.29  | -0.07 |
| trans-2-Octenal                   | 4.53  | 4.79  | -0.26 |
| trans-2-Octene                    | 3.16  | 3.48  | -0.32 |
| trans-4-Methylcyclohexanol        | 5.47  | 5.29  | 0.18  |
| trans-Decalin                     | 4.2   | 4.47  | -0.27 |
| Transfluthrin                     | 8.36  | 7.76  | 0.60  |
| trans-Geraniol                    | 6.43  | 6.34  | 0.09  |
| trans-Nonachlor                   | 9.29  | 9.6   | -0.31 |
| trans-Stilbene                    | 7.48  | 6.4   | 1.08  |
| Traseolide                        | 8.18  | 8.26  | -0.08 |
| Tri-2-butoxyethyl phosphate       | 10.9  | 11.3  | -0.40 |
| Triadimenol                       | 11.13 | 11.78 | -0.65 |
| Triallate                         | 7.95  | 7.8   | 0.15  |
| Triallylamine                     | 4.53  | 4.2   | 0.33  |
| Triasulfuron                      | 13.47 | 12.57 | 0.90  |
| Triazophos                        | 9.59  | 9.41  | 0.18  |
| Triazothion                       | 9.59  | 9.91  | -0.32 |
| Tributyl phosphate                | 8.03  | 8.15  | -0.12 |
| Trichlopyr                        | 9.48  | 9.28  | 0.20  |
| Trichloroacetic acid              | 7.36  | 6.2   | 1.16  |
| Trichloroethylene                 | 3     | 3.04  | -0.04 |
| Trichloronate                     | 8.42  | 8.42  | 0.00  |
| Trichlorosyringol                 | 8.69  | 8.51  | 0.18  |
| Tricyclene                        | 3.87  | 4     | -0.13 |
| Tridecane                         | 5.34  | 5.4   | -0.06 |
| Tridecylamine                     | 8.24  | 7.85  | 0.39  |

|                                   |       |       |       |
|-----------------------------------|-------|-------|-------|
| Tridiphan                         | 7.09  | 8.27  | -1.18 |
| Triethyl phosphate                | 5.21  | 5.57  | -0.36 |
| Triethylamine                     | 3.45  | 3.54  | -0.09 |
| Trifloxystrobin                   | 10.46 | 10.07 | 0.39  |
| Triflumuron                       | 11.31 | 12.38 | -1.07 |
| Trihexyl phosphate                | 11.6  | 10.73 | 0.87  |
| Tri-m-cresylphosphate             | 11.06 | 11.21 | -0.15 |
| Trimethyl phosphate               | 5.3   | 4.67  | 0.63  |
| Trimethylacetic acid              | 5.29  | 5.1   | 0.19  |
| Trimethylamine                    | 2.36  | 2.28  | 0.08  |
| Trimethyleneglycol dinitrate      | 5.08  | 5.13  | -0.05 |
| Trimethylethylene                 | 1.78  | 2.24  | -0.46 |
| tri-n-Amylphosphate               | 9.31  | 9.44  | -0.13 |
| Tri-o-cresylphosphate             | 10.7  | 11.21 | -0.51 |
| Tri-p-cresyl phosphate            | 11.3  | 11.21 | 0.09  |
| Triphenyl phosphate               | 10.09 | 9.98  | 0.11  |
| Tripropyl phosphate               | 6.2   | 6.86  | -0.66 |
| Tripropylamine                    | 4.34  | 4.83  | -0.49 |
| Tris(2-chloroethyl) phosphate     | 7.85  | 7.91  | -0.06 |
| Tris(2-ethylhexyl) phosphate      | 11.9  | 12.44 | -0.54 |
| Tris(2-isopropylphenyl) phosphate | 11.78 | 12.92 | -1.14 |
| Tris-BP                           | 13.5  | 12.86 | 0.64  |
| Tycor                             | 8.32  | 8.83  | -0.51 |
| Undecane                          | 4.56  | 4.64  | -0.08 |
| Veratrole                         | 4.93  | 4.36  | 0.57  |
| Vernolate                         | 6.8   | 7.06  | -0.26 |
| Vinclozolin                       | 8.69  | 7.8   | 0.89  |
| Vinyl acetate                     | 2.33  | 2.49  | -0.16 |
| Vinylidenechloride                | 2.34  | 2.41  | -0.07 |
| Vitavax                           | 9.81  | 9.58  | 0.23  |
