# Supplementary material
Source: MDPI journal article supplement (https://www.mdpi.com/2673-8015/4/1/11)
Supplement: s1 [file s1]

| Molecule name                          | logKaw<br>exp | logKaw<br>calc | Diff  |
|----------------------------------------|---------------|----------------|-------|
| (Bromomethyl)benzene                   | -1.74         | -2.14          | 0.40  |
| (Chloromethyl)benzene                  | -1.74         | -1.88          | 0.14  |
| (Trichloromethyl)benzene               | -1.22         | -1.52          | 0.30  |
| 1-(2-Methylphenyl)ethanone             | -3.25         | -3.17          | -0.08 |
| 1-(3-Methylphenyl)ethanone             | -3.55         | -3.17          | -0.38 |
| 1,1,1,2-Tetrachloroethane              | -1.09         | -1.13          | 0.04  |
| 1,1,1-Trichloropropane                 | -0.88         | -0.42          | -0.46 |
| 1,1,1-Trifluoro-2-propanol             | -3.05         | -2.53          | -0.52 |
| 1,1,2,2-Tetrachloroethane              | -1.73         | -1.23          | -0.50 |
| 1,1,2-Trichloroethane                  | -1.44         | -1.36          | -0.08 |
| 1,1,2-Trichloropropane                 | -1.89         | -1.18          | -0.71 |
| 1,1,3-Trimethylcyclopentane            | 1.81          | 0.97           | 0.84  |
| 1,10-Decyl dinitrate                   | -3.02         | -3.19          | 0.17  |
| 1,10-Dichlorodecane                    | -0.69         | -1.5           | 0.81  |
| 1,12-Dichlorododecane                  | -0.58         | -1.39          | 0.81  |
| 1,1-Dichloroacetone                    | -2.83         | -2.58          | -0.25 |
| 1,1-Dichlorobutane                     | -0.51         | -0.65          | 0.14  |
| 1,1-Dichloroethane                     | -0.62         | -0.64          | 0.02  |
| 1,1-Dichloropropane                    | -0.81         | -0.65          | -0.16 |
| 1,1-Dichloropropene                    | -0.13         | -0.43          | 0.30  |
| 1,1-Diethoxyethane                     | -2.4          | -2.42          | 0.02  |
| 1,1-Dimethyl-3-phenylurea              | -7.09         | -7.02          | -0.07 |
| 1,2,10,11-Tetrachloroundecane          | -2.59         | -2.46          | -0.13 |
| 1,2,3,4,5,6,8-Heptachloronaphthalene   | -3.77         | -2.98          | -0.79 |
| 1,2,3,4,5,7-Hexachloronaphthalene      | -2.97         | -2.91          | -0.06 |
| 1,2,3,4,5,8-Hexachloronaphthalene      | -3.37         | -2.92          | -0.45 |
| 1,2,3,4,6,7,8-Heptachlorodibenzofuran  | -3.24         | -3.63          | 0.39  |
| 1,2,3,4,6,7-Hexachloronaphthalene      | -3.03         | -2.91          | -0.12 |
| 1,2,3,4,6,8,9-Heptachlorodibenzofuran  | -3.23         | -3.67          | 0.44  |
| 1,2,3,4,6,8-Hexachlorodibenzofuran     | -3.29         | -3.6           | 0.31  |
| 1,2,3,4,6-Pentachloronaphthalene       | -2.38         | -2.84          | 0.46  |
| 1,2,3,4,7,8,9-Heptachlorodibenzofuran  | -3.19         | -3.67          | 0.48  |
| 1,2,3,4,7,8-Hexachlorodibenzofuran     | -3.29         | -3.6           | 0.31  |
| 1,2,3,4,7,8-Hexachlorodibenzo-p-dioxin | -3.76         | -3.64          | -0.12 |
| 1,2,3,4,7-Pentachlorodibenzofuran      | -3.26         | -3.49          | 0.23  |
| 1,2,3,4,7-Pentachlorodibenzo-p-dioxin  | -3.56         | -3.54          | -0.02 |
| 1,2,3,4-Tetrachlorobenzene             | -1.6          | -1.37          | -0.23 |
| 1,2,3,4-Tetrachlorodibenzofuran        | -3.15         | -3.42          | 0.27  |
| 1,2,3,4-Tetrachlorodibenzo-p-dioxin    | -3.33         | -3.47          | 0.14  |
| 1,2,3,4-Tetrachloronaphthalene         | -2.58         | -2.77          | 0.19  |

|                                        |        |       |       |
|----------------------------------------|--------|-------|-------|
| 1,2,3,4-Tetrahydronaphthalene          | -1.2   | -1.46 | 0.26  |
| 1,2,3,5,6,7-Hexachloronaphthalene      | -2.8   | -2.92 | 0.12  |
| 1,2,3,5,7,8-Hexachloronaphthalene      | -3.02  | -2.91 | -0.11 |
| 1,2,3,5,7-Pentachloronaphthalene       | -2.23  | -2.84 | 0.61  |
| 1,2,3,5,8-Pentachloronaphthalene       | -2.67  | -2.84 | 0.17  |
| 1,2,3,5-Tetrachlorobenzene             | -1.4   | -1.37 | -0.03 |
| 1,2,3,5-Tetrachloronaphthalene         | -2.51  | -2.77 | 0.26  |
| 1,2,3,5-Tetrafluorobenzene             | -0.1   | -0.3  | 0.20  |
| 1,2,3,6,7,8-Hexachlorodibenzofuran     | -3.29  | -3.6  | 0.31  |
| 1,2,3,6,7,8-Hexachlorodibenzo-p-dioxin | -3.78  | -3.64 | -0.14 |
| 1,2,3,7,8,9-Hexachlorodibenzofuran     | -3.28  | -3.6  | 0.32  |
| 1,2,3,7,8,9-Hexachlorodibenzo-p-dioxin | -3.78  | -3.64 | -0.14 |
| 1,2,3,7,8-Pentachlorodibenzofuran      | -3.26  | -3.49 | 0.23  |
| 1,2,3,7,8-Pentachlorodibenzo-p-dioxin  | -3.57  | -3.54 | -0.03 |
| 1,2,3,7-Tetrachlorodibenzofuran        | -3.14  | -3.42 | 0.28  |
| 1,2,3,7-Tetrachlorodibenzo-p-dioxin    | -3.33  | -3.5  | 0.17  |
| 1,2,3-Propanetriol                     | -10.07 | -9.41 | -0.66 |
| 1,2,3-Trichlorobenzene                 | -1.3   | -1.3  | 0.00  |
| 1,2,3-Trichloropropane                 | -2     | -2.01 | 0.01  |
| 1,2,4,5,8-Pentachloronaphthalene       | -2.81  | -2.85 | 0.04  |
| 1,2,4,5-Tetrachlorobenzene             | -1.39  | -1.37 | -0.02 |
| 1,2,4,5-Tetrafluorobenzene             | -0.14  | -0.29 | 0.15  |
| 1,2,4,5-Tetramethylbenzene             | -1     | -0.87 | -0.13 |
| 1,2,4,6,7,8-Hexachlorodibenzofuran     | -3.29  | -3.6  | 0.31  |
| 1,2,4,6,7,9-Hexachlorodibenzo-p-dioxin | -3.71  | -3.61 | -0.10 |
| 1,2,4,6,8,9-Hexachlorodibenzofuran     | -3.29  | -3.6  | 0.31  |
| 1,2,4,7,8-Pentachlorodibenzofuran      | -3.26  | -3.49 | 0.23  |
| 1,2,4,7,8-Pentachlorodibenzo-p-dioxin  | -3.79  | -3.54 | -0.25 |
| 1,2,4-Trichlorobenzene                 | -1.24  | -1.3  | 0.06  |
| 1,2,4-Trichlorodibenzo-p-dioxin        | -3.04  | -3.4  | 0.36  |
| 1,2,4-Trichloronaphthalene             | -2.32  | -2.71 | 0.39  |
| 1,2,4-Trimethylbenzene                 | -0.76  | -0.85 | 0.09  |
| 1,2,4-Trimethylnaphthalene             | -2.24  | -2.05 | -0.19 |
| 1,2,5,6-Tetramethylnaphthalene         | -2.26  | -1.98 | -0.28 |
| 1,2,5,8-Tetrachloronaphthalene         | -2.74  | -2.78 | 0.04  |
| 1,2,5-Trichloronaphthalene             | -2.44  | -2.71 | 0.27  |
| 1,2,6,8-Tetrachloronaphthalene         | -2.74  | -2.77 | 0.03  |
| 1,2,6-Trichloronaphthalene             | -2.62  | -2.71 | 0.09  |
| 1,2,7,8-Tetrachlorodibenzofuran        | -3.16  | -3.42 | 0.26  |
| 1,2,7,8-Tetrachlorodibenzo-p-dioxin    | -3.28  | -3.47 | 0.19  |
| 1,2,7-Trichloronaphthalene             | -2.56  | -2.71 | 0.15  |
| 1,2,9,10-Tetrachlorodecane             | -2.14  | -2.56 | 0.42  |

|                                                   |       |       |       |
|---------------------------------------------------|-------|-------|-------|
| 1,2-Benzenedicarboxylic acid, di-2-propenyl ester | -4.94 | -5.27 | 0.33  |
| 1,2-Bis(2-chloroethylthio)ethane                  | -5.34 | -4.07 | -1.27 |
| 1,2-Butanediol                                    | -6.72 | -6.28 | -0.44 |
| 1,2-Butyl dinitrate                               | -2.71 | -2.97 | 0.26  |
| 1,2-Decyl dinitrate                               | -1.69 | -2.97 | 1.28  |
| 1,2-Diaminobenzene                                | -5.77 | -7.03 | 1.26  |
| 1,2-Dibromobenzene                                | -1.53 | -1.65 | 0.12  |
| 1,2-Dibromoethane                                 | -1.71 | -2.01 | 0.30  |
| 1,2-Dibromopropane                                | -1.42 | -1.53 | 0.11  |
| 1,2-Dibutoxyethane                                | -2.8  | -2.48 | -0.32 |
| 1,2-Dichlorobenzene                               | -1.14 | -1.23 | 0.09  |
| 1,2-Dichloronaphthalene                           | -2.47 | -2.63 | 0.16  |
| 1,2-Dichloropropane                               | -0.95 | -1.31 | 0.36  |
| 1,2-Difluorobenzene                               | -0.51 | -0.69 | 0.18  |
| 1,2-Dihydroxybenzene                              | -7.01 | -6.59 | -0.42 |
| 1,2-Dimethylbenzene                               | -0.7  | -0.83 | 0.13  |
| 1,2-Dimethylnaphthalene                           | -2.08 | -2.03 | -0.05 |
| 1,2-Diphenylethane                                | -2.11 | -1.55 | -0.56 |
| 1,2-Ethanediol                                    | -7.21 | -6.55 | -0.66 |
| 1,2-Ethanediol dinitrate                          | -3.29 | -3.27 | -0.02 |
| 1,2-Hexanediol                                    | -6.62 | -6.28 | -0.34 |
| 1,2-Hexyl dinitrate                               | -2.38 | -2.97 | 0.59  |
| 1,2-Octyl dinitrate                               | -2.11 | -2.97 | 0.86  |
| 1,2-Pentanediol                                   | -6.54 | -6.28 | -0.26 |
| 1,2-Pentyl dinitrate                              | -2.52 | -2.97 | 0.45  |
| 1,2-Propanediol                                   | -6.83 | -6.28 | -0.55 |
| 1,2-Propyl dinitrate                              | -2.9  | -2.97 | 0.07  |
| 1,3,5,7-Tetrachloronaphthalene                    | -2.19 | -2.77 | 0.58  |
| 1,3,5,8-Tetrachloronaphthalene                    | -2.52 | -2.77 | 0.25  |
| 1,3,5-Cycloheptatriene                            | -0.74 | -0.97 | 0.23  |
| 1,3,5-Tribromobenzene                             | -1.51 | -1.93 | 0.42  |
| 1,3,5-Trichlorobenzene                            | -1.11 | -1.3  | 0.19  |
| 1,3,5-Trichloronaphthalene                        | -2.25 | -2.71 | 0.46  |
| 1,3,5-Triethylbenzene                             | -0.4  | -0.62 | 0.22  |
| 1,3,5-Trimethylbenzene                            | -0.55 | -0.85 | 0.30  |
| 1,3,5-Trinitrobenzene                             | -6.91 | -5.74 | -1.17 |
| 1,3,5-Trioxane                                    | -3.3  | -3.11 | -0.19 |
| 1,3,6,8-Tetrachlorodibenzofuran                   | -3.08 | -3.42 | 0.34  |
| 1,3,6,8-Tetrachlorodibenzo-p-dioxin               | -3.22 | -3.47 | 0.25  |
| 1,3,7,8-Tetrachlorodibenzofuran                   | -3.11 | -3.42 | 0.31  |
| 1,3,7,8-Tetrachlorodibenzo-p-dioxin               | -3.28 | -3.5  | 0.22  |
| 1,3,7,9-Tetrachlorodibenzofuran                   | -3.12 | -3.42 | 0.30  |

|                                     |       |       |       |
|-------------------------------------|-------|-------|-------|
| 1,3,7,9-Tetrachlorodibenzo-p-dioxin | -3.24 | -3.47 | 0.23  |
| 1,3,7-Trichlorodibenzo-p-dioxin     | -3.03 | -3.4  | 0.37  |
| 1,3,7-Trimethylnaphthalene          | -2.17 | -1.96 | -0.21 |
| 1,3-Butyl dinitrate                 | -3.15 | -2.97 | -0.18 |
| 1,3-Butyleneglycol                  | -6.37 | -6.28 | -0.09 |
| 1,3-Diaminobenzene                  | -7.35 | -7.04 | -0.31 |
| 1,3-Dibromobenzene                  | -1.47 | -1.65 | 0.18  |
| 1,3-Dibromopropane                  | -1.44 | -2.02 | 0.58  |
| 1,3-Dichloro-2-propanol             | -4.33 | -4.55 | 0.22  |
| 1,3-Dichlorobenzene                 | -0.89 | -1.23 | 0.34  |
| 1,3-Dichloropropane                 | -1.44 | -1.48 | 0.04  |
| 1,3-Diethylbenzene                  | -0.47 | -0.66 | 0.19  |
| 1,3-Difluorobenzene                 | -0.35 | -0.69 | 0.34  |
| 1,3-Dihydroxybenzene                | -8.39 | -6.59 | -1.80 |
| 1,3-Diisopropylbenzene              | -0.46 | -0.26 | -0.20 |
| 1,3-Diisopropylnaphthalene          | -1.29 | -1.42 | 0.13  |
| 1,3-Dimethylbenzene                 | -0.57 | -0.83 | 0.26  |
| 1,3-Dimethylnaphthalene             | -1.81 | -2.03 | 0.22  |
| 1,3-Dinitrobenzene                  | -4.96 | -4.19 | -0.77 |
| 1,3-Dioxane                         | -3.5  | -2.82 | -0.68 |
| 1,3-Dioxolan-2-one                  | -3    | -3.73 | 0.73  |
| 1,3-Propanediol                     | -7.09 | -6.57 | -0.52 |
| 1,4,5,8-Tetrachloronaphthalene      | -2.94 | -2.78 | -0.16 |
| 1,4,5-Trichloronaphthalene          | -2.75 | -2.71 | -0.04 |
| 1,4,5-Trimethylnaphthalene          | -2.02 | -2.05 | 0.03  |
| 1,4,6,7-Tetramethylnaphthalene      | -2.33 | -1.98 | -0.35 |
| 1,4,6-Trimethylnaphthalene          | -2.03 | -1.96 | -0.07 |
| 1,4-Benzoquinone                    | -4.71 | -5.01 | 0.30  |
| 1,4-Bis(methylamino)anthraquinone   | -8.11 | -8.42 | 0.31  |
| 1,4-Butyl dinitrate                 | -3.59 | -3.25 | -0.34 |
| 1,4-Cyclohexadiene                  | -0.51 | -0.81 | 0.30  |
| 1,4-Diaminoanthraquinone            | -8.1  | -8.9  | 0.80  |
| 1,4-Dibromobenzene                  | -1.37 | -1.65 | 0.28  |
| 1,4-Dibromobutane                   | -1.77 | -2.02 | 0.25  |
| 1,4-Dibromonaphthalene              | -2.16 | -3.06 | 0.90  |
| 1,4-Dichlorobenzene                 | -0.9  | -1.23 | 0.33  |
| 1,4-Dichlorobutane                  | -1.7  | -1.47 | -0.23 |
| 1,4-Dichloronaphthalene             | -2.27 | -2.63 | 0.36  |
| 1,4-Diethylbenzene                  | -0.41 | -0.66 | 0.25  |
| 1,4-Difluorobenzene                 | -0.6  | -0.69 | 0.09  |
| 1,4-Dimethylbenzene                 | -0.57 | -0.83 | 0.26  |
| 1,4-Dimethylnaphthalene             | -2.07 | -2.03 | -0.04 |

|                                |        |       |       |
|--------------------------------|--------|-------|-------|
| 1,4-Dinitrobenzene             | -5     | -4.19 | -0.81 |
| 1,4-Dioxane                    | -3.71  | -3.29 | -0.42 |
| 1,4-Pentadiene                 | 0.68   | 0.21  | 0.47  |
| 1,4-Pentanediol                | -6.14  | -6.28 | 0.14  |
| 1,4-Pentyl dinitrate           | -2.98  | -2.96 | -0.02 |
| 1,5-Dichloronaphthalene        | -2     | -2.64 | 0.64  |
| 1,5-Dichloropentane            | -1.39  | -1.46 | 0.07  |
| 1,5-Dimethylnaphthalene        | -1.84  | -2.03 | 0.19  |
| 1,5-Hexadiene                  | 0.74   | 0.27  | 0.47  |
| 1,5-Hexyl dinitrate            | -2.83  | -2.95 | 0.12  |
| 1,5-Pentanediol                | -8.24  | -6.52 | -1.72 |
| 1,5-Pentyl dinitrate           | -3.46  | -3.24 | -0.22 |
| 1,6,7-Trichloronaphthalene     | -2.56  | -2.71 | 0.15  |
| 1,6-Dimethylnaphthalene        | -1.89  | -1.94 | 0.05  |
| 1,6-Heptadiene                 | 0.86   | 0.38  | 0.48  |
| 1,6-Heptadiyne                 | -1.06  | -0.88 | -0.18 |
| 1,6-Hexanedioic acid           | -11.15 | -9.98 | -1.17 |
| 1,6-Hexyl dinitrate            | -3.57  | -3.23 | -0.34 |
| 1,7-Dimethylnaphthalene        | -1.98  | -2.03 | 0.05  |
| 1,7-Heptyl dinitrate           | -3.45  | -3.22 | -0.23 |
| 1,8-Cineole                    | -2.16  | -2.13 | -0.03 |
| 1,8-Dibromooctane              | -1.51  | -2.02 | 0.51  |
| 1,8-Dichlorooctane             | -1.25  | -1.5  | 0.25  |
| 1,8-Dimethylnaphthalene        | -2.25  | -2.03 | -0.22 |
| 1,8-Nonadiyne                  | -0.87  | -0.76 | -0.11 |
| 1,8-Octyl dinitrate            | -3.29  | -3.21 | -0.08 |
| 1-Amino-4-hydroxyanthraquinone | -6.87  | -8.67 | 1.80  |
| 1-Aminoanthraquinone           | -6.7   | -7.93 | 1.23  |
| 1-Bromo-2-ethylbenzene         | -0.87  | -1.46 | 0.59  |
| 1-Bromo-2-fluorobenzene        | -1.01  | -1.18 | 0.17  |
| 1-Bromo-2-methylbutane         | -0.02  | -0.9  | 0.88  |
| 1-Bromo-3-chloropropane        | -1.99  | -1.74 | -0.25 |
| 1-Bromo-3-fluorobenzene        | -0.86  | -1.18 | 0.32  |
| 1-Bromo-4-chlorobenzene        | -1.23  | -1.45 | 0.22  |
| 1-Bromobutane                  | -0.29  | -1.01 | 0.72  |
| 1-Bromodecane                  | 0.38   | -1.04 | 1.42  |
| 1-Bromonaphthalene             | -1.93  | -2.78 | 0.85  |
| 1-Bromooctane                  | 0.38   | -0.97 | 1.35  |
| 1-Bromopentane                 | -0.09  | -1    | 0.91  |
| 1-Bromopropane                 | -0.44  | -1.02 | 0.58  |
| 1-Butanol                      | -3.39  | -3.38 | -0.01 |
| 1-Butene                       | 0.98   | 0.16  | 0.82  |

|                                                 |       |       |       |
|-------------------------------------------------|-------|-------|-------|
| 1-Butoxy-2-propanol                             | -3.73 | -4.33 | 0.60  |
| 1-Butylamine                                    | -3.11 | -3.25 | 0.14  |
| 1-Butyne                                        | -0.14 | -0.47 | 0.33  |
| 1-Chloro-2,4-dinitrobenzene                     | -5.01 | -4.29 | -0.72 |
| 1-Chloro-2-fluorobenzene                        | -0.88 | -0.97 | 0.09  |
| 1-Chloro-3-fluorobenzene                        | -0.61 | -0.97 | 0.36  |
| 1-Chlorobutane                                  | -0.14 | -0.75 | 0.61  |
| 1-Chlorodibenzo-p-dioxin                        | -2.5  | -3.26 | 0.76  |
| 1-Chloroheptane                                 | 0.21  | -0.72 | 0.93  |
| 1-Chlorohexane                                  | -0.01 | -0.78 | 0.77  |
| 1-Chloronaphthalene                             | -1.84 | -2.56 | 0.72  |
| 1-Chlorooctane                                  | 0.37  | -0.78 | 1.15  |
| 1-Chloropentane                                 | -0.01 | -0.74 | 0.73  |
| 1-Chloropropane                                 | -0.28 | -0.76 | 0.48  |
| 1-Decene                                        | 1.6   | 0.55  | 1.05  |
| 1-Dodecanol                                     | -2.58 | -3.3  | 0.72  |
| 1-Ethoxy-butane                                 | -1.28 | -1.22 | -0.06 |
| 1-Ethyl naphthalene                             | -1.72 | -1.95 | 0.23  |
| 1-Heptanol                                      | -3.09 | -3.35 | 0.26  |
| 1-Heptene                                       | 1.22  | 0.34  | 0.88  |
| 1-Heptyne                                       | 0.44  | -0.26 | 0.70  |
| 1-Hexadecanol                                   | -2.72 | -3.26 | 0.54  |
| 1-Hexanol                                       | -3.16 | -3.36 | 0.20  |
| 1-Hexene                                        | 1.16  | 0.28  | 0.88  |
| 1-Hexyl nitrate                                 | -1.22 | -1.62 | 0.40  |
| 1-Hexyne                                        | 0.19  | -0.35 | 0.54  |
| 1-Hydroxy-2-butyl nitrate                       | -5.17 | -4.71 | -0.46 |
| 1-Hydroxy-2-propyl nitrate                      | -5.24 | -4.72 | -0.52 |
| 1-Hydroxy-3-butyl nitrate                       | -5.25 | -4.71 | -0.54 |
| 1-Hydroxy-4-pentyl nitrate                      | -5.45 | -4.7  | -0.75 |
| 1-Hydroxyanthraquinone                          | -6.52 | -7.71 | 1.19  |
| 1-Iodobutane                                    | -0.23 | -0.42 | 0.19  |
| 1-Iodoheptane                                   | 0.19  | -0.39 | 0.58  |
| 1-Iodohexane                                    | 0.06  | -0.42 | 0.48  |
| 1-Iodopentane                                   | -0.17 | -0.41 | 0.24  |
| 1-Methoxy-2-propanol                            | -4.43 | -4.45 | 0.02  |
| 1-Methyl-4-isopropyl-7-oxabicyclo[2.2.1]heptane | -2.11 | -2.11 | 0.00  |
| 1-Methyl-4-isopropylcyclohexene                 | -0.07 | -0.17 | 0.10  |
| 1-Methylcyclohexene                             | 0.49  | -0.56 | 1.05  |
| 1-Methylfluorene                                | -2.67 | -2.45 | -0.22 |
| 1-Methylnaphthalene                             | -1.79 | -2.01 | 0.22  |
| 1-Methylphenanthrene                            | -2.7  | -3.21 | 0.51  |

|                                                |       |       |       |
|------------------------------------------------|-------|-------|-------|
| 1-Methylpiperazine                             | -5.43 | -5.03 | -0.40 |
| 1-Naphthaleneacetic acid                       | -6.95 | -6.87 | -0.08 |
| 1-Naphthylamine                                | -5.34 | -5.46 | 0.12  |
| 1-Nitrobutane                                  | -2.27 | -2.24 | -0.03 |
| 1-Nitronaphthalene                             | -4.14 | -4.04 | -0.10 |
| 1-Nitrooxy-2-butanol                           | -5.15 | -4.72 | -0.43 |
| 1-Nitrooxy-2-propanol                          | -5.43 | -4.72 | -0.71 |
| 1-Nitropentane                                 | -2.07 | -2.23 | 0.16  |
| 1-Nitropropane                                 | -2.51 | -2.25 | -0.26 |
| 1-Nonanol                                      | -2.85 | -3.33 | 0.48  |
| 1-Nonene                                       | 1.51  | 0.46  | 1.05  |
| 1-Nonyne                                       | 0.77  | -0.14 | 0.91  |
| 1-Octadecanol                                  | -1.44 | -3.41 | 1.97  |
| 1-Octanol                                      | -3    | -3.34 | 0.34  |
| 1-Octyne                                       | 0.52  | -0.2  | 0.72  |
| 1-Pentadecene                                  | 2.25  | 0.85  | 1.40  |
| 1-Pentanol                                     | -3.27 | -3.37 | 0.10  |
| 1-Pentene                                      | 1.22  | 0.25  | 0.97  |
| 1-Pentyl nitrate                               | -1.17 | -1.66 | 0.49  |
| 1-Pentyne                                      | -0.12 | -0.41 | 0.29  |
| 1-Phenyl-1-propanone                           | -3.37 | -3.09 | -0.28 |
| 1-Propanol                                     | -3.52 | -3.39 | -0.13 |
| 1-Propylamine                                  | -3.29 | -3.26 | -0.03 |
| 1-trans-5-trans-9-cis-Cyclododecatriene        | 0.36  | -0.68 | 1.04  |
| 1-Tridecanol                                   | -2.47 | -3.29 | 0.82  |
| 1-Undecanol                                    | -2.47 | -3.31 | 0.84  |
| 2-(2,4-Dichlorophenoxy)propanoic acid          | -7.37 | -5.71 | -1.66 |
| 2-(2-Butoxyethoxy)ethyl acetate                | -4.97 | -4.51 | -0.46 |
| 2-(Phenoxymethyl)oxirane                       | -4.47 | -3.22 | -1.25 |
| 2,2,2-Trichloroethanol                         | -3.86 | -3.76 | -0.10 |
| 2,2,2-Trifluoroethanol                         | -3.07 | -2.82 | -0.25 |
| 2,2,2-Trifluoroethyl formate                   | -1.14 | -1.29 | 0.15  |
| 2,2,2-Trifluoroethylacetate                    | -1.16 | -1.51 | 0.35  |
| 2,2',3,3',4,4',5,5',6-Nonachlorobiphenyl       | -3.47 | -2.9  | -0.57 |
| 2,2',3,3',4,4',5,5',6-Nonachlorodiphenyl ether | -1.26 | -2.94 | 1.68  |
| 2,2',3,3',4,4',5,5'-Octachlorobiphenyl         | -3.39 | -2.83 | -0.56 |
| 2,2',3,3',4,4',5,6,6'-Nonachlorobiphenyl       | -2.91 | -2.9  | -0.01 |
| 2,2',3,3',4,4',5,6'-Octachlorobiphenyl         | -3.39 | -2.83 | -0.56 |
| 2,2',3,3',4,4',5-Heptachlorobiphenyl           | -3.43 | -2.76 | -0.67 |
| 2,2',3,3',4,4',6,6'-Octachlorobiphenyl         | -2.67 | -2.83 | 0.16  |
| 2,2',3,3',4,4',6-Heptachlorobiphenyl           | -3.5  | -2.76 | -0.74 |
| 2,2',3,3',4,4'-Hexachlorobiphenyl              | -2.56 | -2.69 | 0.13  |

|                                            |       |       |       |
|--------------------------------------------|-------|-------|-------|
| 2,2',3,3',4,4'-Hexachlorodiphenyl ether    | -2.31 | -2.74 | 0.43  |
| 2,2',3,3',4,5,5',6,6'-Nonachlorobiphenyl   | -2.78 | -2.93 | 0.15  |
| 2,2',3,3',4,5,5',6'-Octachlorobiphenyl     | -3.39 | -2.83 | -0.56 |
| 2,2',3,3',4,5,5',6-Octachlorobiphenyl      | -3.24 | -2.83 | -0.41 |
| 2,2',3,3',4,5,5'-Heptachlorobiphenyl       | -3.27 | -2.76 | -0.51 |
| 2,2',3,3',4,5,6,6'-Octachlorobiphenyl      | -1.57 | -2.83 | 1.26  |
| 2,2',3,3',4,5',6'-Heptachlorobiphenyl      | -2.87 | -2.76 | -0.11 |
| 2,2',3,3',4,5',6-Heptachlorobiphenyl       | -2.93 | -2.76 | -0.17 |
| 2,2',3,3',4,5'-Hexachlorobiphenyl          | -2.83 | -2.69 | -0.14 |
| 2,2',3,3',4,6,6'-Heptachlorobiphenyl       | -3.11 | -2.76 | -0.35 |
| 2,2',3,3',4,6'-Hexachlorobiphenyl          | -2.75 | -2.69 | -0.06 |
| 2,2',3,3',4,6-Hexachlorobiphenyl           | -2.8  | -2.69 | -0.11 |
| 2,2',3,3',4-Pentabromodiphenyl ether       | -3.25 | -3.72 | 0.47  |
| 2,2',3,3',5,5',6,6'-Octachlorobiphenyl     | -3.13 | -2.83 | -0.30 |
| 2,2',3,3',5,5',6-Heptachlorobiphenyl       | -3.03 | -2.76 | -0.27 |
| 2,2',3,3',5,6,6'-Heptachlorobiphenyl       | -3.01 | -2.76 | -0.25 |
| 2,2',3,3',5,6'-Hexachlorobiphenyl          | -2.64 | -2.69 | 0.05  |
| 2,2',3,3',5,6-Hexachlorobiphenyl           | -2.7  | -2.69 | -0.01 |
| 2,2',3,3',6,6'-Hexachlorobiphenyl          | -2.44 | -2.69 | 0.25  |
| 2,2',3,3',6-Pentachlorobiphenyl            | -2.76 | -2.62 | -0.14 |
| 2,2',3,3'-Tetrachlorobiphenyl              | -2.39 | -2.55 | 0.16  |
| 2,2,3,3-Tetramethylbutane                  | 1.99  | 2.08  | -0.09 |
| 2,2',3,4,4',5,5',6-Octachlorobiphenyl      | -1.9  | -2.83 | 0.93  |
| 2,2',3,4,4',5,5'-Heptachlorobiphenyl       | -3.39 | -2.76 | -0.63 |
| 2,2',3,4,4',5,5'-Heptachlorodiphenyl ether | -1.09 | -2.81 | 1.72  |
| 2,2',3,4,4',5',6-Heptabromodiphenylether   | -5.52 | -4.29 | -1.23 |
| 2,2',3,4,4',5',6-Heptachlorobiphenyl       | -2.52 | -2.76 | 0.24  |
| 2,2',3,4,4',5,6'-Heptachlorobiphenyl       | -2.12 | -2.76 | 0.64  |
| 2,2',3,4,4',5,6-Heptachlorobiphenyl        | -1.47 | -2.76 | 1.29  |
| 2,2',3,4,4',5'-Hexachlorobiphenyl          | -3.07 | -2.69 | -0.38 |
| 2,2',3,4,4',5-Hexachlorobiphenyl           | -2.23 | -2.69 | 0.46  |
| 2,2',3,4,4',5'-Hexachlorodiphenyl ether    | -1.86 | -2.74 | 0.88  |
| 2,2',3,4,4',5-Hexachlorodiphenyl ether     | -1.65 | -2.74 | 1.09  |
| 2,2',3,4,4',6-Hexachlorobiphenyl           | -2.22 | -2.69 | 0.47  |
| 2,2',3,4,4',6'-Hexachlorodiphenyl ether    | -1.87 | -2.74 | 0.87  |
| 2,2',3,4,4'-Pentabromodiphenyl ether       | -4.26 | -3.72 | -0.54 |
| 2,2',3,4,4'-Pentachlorobiphenyl            | -2.54 | -2.62 | 0.08  |
| 2,2',3,4,4'-Pentachlorodiphenyl ether      | -2.11 | -2.67 | 0.56  |
| 2,2',3,4,5,5',6-Heptachlorobiphenyl        | -3.18 | -2.76 | -0.42 |
| 2,2',3,4',5,5',6-Heptachlorobiphenyl       | -3.11 | -2.76 | -0.35 |
| 2,2',3,4,5,5'-Hexachlorobiphenyl           | -3.03 | -2.69 | -0.34 |
| 2,2',3,4',5,5'-Hexachlorobiphenyl          | -2.99 | -2.69 | -0.30 |



|                                         |       |       |       |
|-----------------------------------------|-------|-------|-------|
| 2,2',3,4',5,6,6'-Heptachlorobiphenyl    | -2.25 | -2.76 | 0.51  |
| 2,2',3,4',5,6-Hexachlorobiphenyl        | -2.68 | -2.69 | 0.01  |
| 2,2',3,4,5',6-Hexachlorobiphenyl        | -1.92 | -2.69 | 0.77  |
| 2,2',3,4,5',6-Hexachlorobiphenyl        | -1.57 | -2.69 | 1.12  |
| 2,2',3,4,5'-Pentachlorobiphenyl         | -2.52 | -2.62 | 0.10  |
| 2,2',3,4,5'-Pentachlorobiphenyl         | -1.76 | -2.62 | 0.86  |
| 2,2',3,4',6-Pentachlorobiphenyl         | -2.31 | -2.62 | 0.31  |
| 2,2',3,4'-Tetrachlorobiphenyl           | -2.24 | -2.55 | 0.31  |
| 2,2',3,4-Tetrachlorobiphenyl            | -2.24 | -2.55 | 0.31  |
| 2,2',3,5,5',6-Hexachlorobiphenyl        | -2.62 | -2.69 | 0.07  |
| 2,2',3,5',6-Pentachlorobiphenyl         | -2.31 | -2.62 | 0.31  |
| 2,2',3,5'-Tetrachlorobiphenyl           | -2.24 | -2.55 | 0.31  |
| 2,2',3-Trichlorobiphenyl                | -2.09 | -2.48 | 0.39  |
| 2,2,3-Trimethylhexane                   | 2.34  | 1.9   | 0.44  |
| 2,2,3-Trimethylpentane                  | 1.92  | 1.75  | 0.17  |
| 2,2',4,4',5,5'-Hexabromodiphenyl ether  | -3.96 | -4    | 0.04  |
| 2,2',4,4',5,5'-Hexachlorobiphenyl       | -2.52 | -2.69 | 0.17  |
| 2,2',4,4',5,5'-Hexachlorodiphenyl ether | -1.51 | -2.74 | 1.23  |
| 2,2',4,4',5,6'-Hexabromodiphenyl ether  | -4.01 | -4    | -0.01 |
| 2,2',4,4',5,6'-Hexachlorodiphenyl ether | -1.54 | -2.74 | 1.20  |
| 2,2',4,4',5-Pentabromodiphenyl ether    | -3.67 | -3.72 | 0.05  |
| 2,2',4,4',5-Pentachlorobiphenyl         | -1.74 | -2.62 | 0.88  |
| 2,2',4,4',5-Pentachlorodiphenyl ether   | -1.65 | -2.67 | 1.02  |
| 2,2',4,4',6,6'-Hexachlorobiphenyl       | -1.51 | -2.69 | 1.18  |
| 2,2',4,4',6-Pentabromodiphenyl ether    | -3.81 | -3.72 | -0.09 |
| 2,2',4,4',6-Pentachlorodiphenyl ether   | -1.72 | -2.67 | 0.95  |
| 2,2',4,4'-Tetrabromodiphenyl ether      | -3.35 | -3.44 | 0.09  |
| 2,2',4,4'-Tetrachlorobiphenyl           | -2.72 | -2.55 | -0.17 |
| 2,2',4,4'-Tetrachlorodiphenyl ether     | -1.86 | -2.6  | 0.74  |
| 2,2',4,5,5'-PCB                         | -2.43 | -2.62 | 0.19  |
| 2,2',4,5,5'-Pentachlorodiphenyl ether   | -1.6  | -2.67 | 1.07  |
| 2,2',4,5'-Tetrachlorobiphenyl           | -1.83 | -2.55 | 0.72  |
| 2,2',4,5-Tetrachlorobiphenyl            | -1.73 | -2.58 | 0.85  |
| 2,2',4,6,6'-Pentachlorobiphenyl         | -1.6  | -2.65 | 1.05  |
| 2,2',4,6'-Tetrachlorobiphenyl           | -2.24 | -2.55 | 0.31  |
| 2,2',4-Tribromodiphenyl ether           | -3.53 | -3.16 | -0.37 |
| 2,2',4-Trichlorobiphenyl                | -1.91 | -2.48 | 0.57  |
| 2,2',4-Trichlorodiphenylether           | -3.04 | -2.55 | -0.49 |
| 2,2',5,5'-Tetrachlorobiphenyl           | -2.09 | -2.55 | 0.46  |
| 2,2,5,5-Tetramethyl-3-hexyne            | 1.08  | 0.51  | 0.57  |
| 2,2',5,6'-Tetrachlorobiphenyl           | -1.77 | -2.55 | 0.78  |
| 2,2',5-Trichlorobiphenyl                | -2.86 | -2.48 | -0.38 |

|                                         |       |       |       |
|-----------------------------------------|-------|-------|-------|
| 2,2,5-Trimethyl-3-hexyne                | 0.87  | 0.11  | 0.76  |
| 2,2,5-Trimethylhexane                   | 2.33  | 1.9   | 0.43  |
| 2,2',6,6'-Tetrachlorobiphenyl           | -2.08 | -2.55 | 0.47  |
| 2,2,6,6-Tetramethylheptane              | 2.63  | 2.5   | 0.13  |
| 2,2',6-Trichlorobiphenyl                | -2.03 | -2.48 | 0.45  |
| 2,2'-Dichlorobiphenyl                   | -2.06 | -2.41 | 0.35  |
| 2,2'-Dichlorodiisopropyl ether          | -1.87 | -2.1  | 0.23  |
| 2,2-Dichloroethanol                     | -2.79 | -3.99 | 1.20  |
| 2,2-Dichloropropane                     | -0.32 | -0.4  | 0.08  |
| 2,2-Dichloropropionic acid              | -5.62 | -4.76 | -0.86 |
| 2,2-Dimethoxypropane                    | -2.53 | -0.93 | -1.60 |
| 2,2-Dimethyl-3-hexyne                   | 0.45  | -0.08 | 0.53  |
| 2,2-Dimethylheptane                     | 2.32  | 1.76  | 0.56  |
| 2,2-Dimethylhexane                      | 2.22  | 1.61  | 0.61  |
| 2,2-Dimethyloctane                      | 2.42  | 1.91  | 0.51  |
| 2,2-Dimethylpentane                     | 2.11  | 1.46  | 0.65  |
| 2,2-Dimethylpropane                     | 1.83  | 1.14  | 0.69  |
| 2,3,3',4,4',5,5',6-Octachlorobiphenyl   | -2.72 | -2.83 | 0.11  |
| 2,3,3',4,4',5,6-Heptachlorobiphenyl     | -1.57 | -2.76 | 1.19  |
| 2,3,3',4,4',5',6-Heptachlorobiphenyl    | -1.72 | -2.76 | 1.04  |
| 2,3,3',4,4',5-Hexabromodiphenyl ether   | -3.57 | -4    | 0.43  |
| 2,3,3',4,4',5'-Hexachlorobiphenyl       | -2.6  | -2.69 | 0.09  |
| 2,3,3',4,4',5-Hexachlorobiphenyl        | -2.75 | -2.69 | -0.06 |
| 2,3,3',4,4',6-Hexachlorobiphenyl        | -2.25 | -2.69 | 0.44  |
| 2,3,3',4,4'-Pentachlorobiphenyl         | -2.64 | -2.62 | -0.02 |
| 2,3,3',4,4'-Pentachlorodiphenyl ether   | -2.02 | -2.67 | 0.65  |
| 2,3,3',4',5,5',6-Heptachlorobiphenyl    | -2.71 | -2.76 | 0.05  |
| 2,3,3',4,5,5'-Hexachlorobiphenyl        | -3.09 | -2.69 | -0.40 |
| 2,3,3',4,5,6-Hexachlorobiphenyl         | -3.09 | -2.69 | -0.40 |
| 2,3,3',4',5,6-Hexachlorobiphenyl        | -3.21 | -2.69 | -0.52 |
| 2,3,3',4',6-Pentachlorobiphenyl         | -2.84 | -2.62 | -0.22 |
| 2,3,3',4'-Tetrachlorobiphenyl           | -2.99 | -2.55 | -0.44 |
| 2,3,3',5,5',6-Hexachlorobiphenyl        | -2.93 | -2.69 | -0.24 |
| 2,3,3'-Trichlorobiphenyl                | -2.18 | -2.48 | 0.30  |
| 2,3',4,4',5,5'-Hexachlorodiphenyl ether | -1.31 | -2.74 | 1.43  |
| 2,3,4,4',5,6-Hexachlorobiphenyl         | -2.17 | -2.69 | 0.52  |
| 2,3',4,4',5-Pentachlorobiphenyl         | -2.42 | -2.62 | 0.20  |
| 2,3',4,4',6-Pentachlorobiphenyl         | -2.52 | -2.62 | 0.10  |
| 2,3',4,4'-Tetrabromodiphenyl ether      | -3.7  | -3.44 | -0.26 |
| 2,3,4,4'-Tetrachlorobiphenyl            | -2.18 | -2.55 | 0.37  |
| 2,3',4,4'-Tetrachlorobiphenyl           | -2.31 | -2.55 | 0.24  |
| 2,3',4,4'-Tetrachlorodiphenyl ether     | -1.79 | -2.6  | 0.81  |

|                                          |       |       |       |
|------------------------------------------|-------|-------|-------|
| 2,3,4,5,6-Pentachlorobiphenyl            | -2.45 | -2.62 | 0.17  |
| 2,3,4,5-Tetrachloroanisole               | -1.21 | -1.96 | 0.75  |
| 2,3',4,5-Tetrachlorobiphenyl             | -2.39 | -2.55 | 0.16  |
| 2,3,4',5-Tetrachlorobiphenyl             | -1.75 | -2.55 | 0.80  |
| 2,3',4',5-Tetrachlorobiphenyl            | -2.39 | -2.55 | 0.16  |
| 2,3,4,6,7,8-Hexachlorodibenzofuran       | -3.29 | -3.6  | 0.31  |
| 2,3',4,6-Tetrabromodiphenyl ether        | -3.39 | -3.44 | 0.05  |
| 2,3,4,6-Tetrachloroanisole               | -1.13 | -1.98 | 0.85  |
| 2,3,4',6-Tetrachlorobiphenyl             | -2.24 | -2.55 | 0.31  |
| 2,3,4,6-Tetrachlorophenol                | -3.54 | -4.12 | 0.58  |
| 2,3,4,7,8-Pentachlorodibenzofuran        | -3.28 | -3.49 | 0.21  |
| 2,3,4-Tribromoanisole                    | -1.39 | -2.54 | 1.15  |
| 2,3,4-Trichloroanisole                   | -1.51 | -1.89 | 0.38  |
| 2,3',4-Trichlorobiphenyl                 | -1.91 | -2.48 | 0.57  |
| 2,3,4'-Trichlorobiphenyl                 | -2.24 | -2.48 | 0.24  |
| 2,3',4'-Trichlorobiphenyl                | -2.18 | -2.48 | 0.30  |
| 2,3,4-Trichlorobiphenyl                  | -2.44 | -2.48 | 0.04  |
| 2,3,4-Trimethylhexane                    | 2.36  | 1.71  | 0.65  |
| 2,3,4-Trimethylpentane                   | 1.88  | 1.56  | 0.32  |
| 2,3,5,6-Tetrachloroanisole               | -0.9  | -1.96 | 1.06  |
| 2,3,5,6-Tetrachlorobiphenyl              | -1.97 | -2.55 | 0.58  |
| 2,3,5,6-Tetrachloropyridine              | -2.1  | -2.71 | 0.61  |
| 2,3',5'-Trichlorobiphenyl                | -1.51 | -2.48 | 0.97  |
| 2,3',5-Trichlorobiphenyl                 | -2.09 | -2.48 | 0.39  |
| 2,3,5-Trichlorophenol                    | -3.52 | -4.06 | 0.54  |
| 2,3,6-Tribromoanisole                    | -1.37 | -2.54 | 1.17  |
| 2,3,6-Trichlorobiphenyl                  | -2.05 | -2.48 | 0.43  |
| 2,3',6-Trichlorobiphenyl                 | -1.83 | -2.51 | 0.68  |
| 2,3,6-Trichlorodiphenylether             | -1.87 | -2.55 | 0.68  |
| 2,3,6-Trichlorotoluene                   | -1.21 | -1.39 | 0.18  |
| 2,3,6-Trimethylnaphthalene               | -1.84 | -2.05 | 0.21  |
| 2,3,7,8-Tetrabromodibenzo-p-dioxin       | -3.87 | -4.31 | 0.44  |
| 2,3,7,8-Tetrachlorodibenzofuran          | -3.17 | -3.42 | 0.25  |
| 2,3,7,8-Tetrachlorodibenzo-p-dioxin      | -3.35 | -3.47 | 0.12  |
| 2,3,7-Trichlorodibenzo-p-dioxin          | -3.09 | -3.4  | 0.31  |
| 2,3,8-Trichlorodibenzofuran              | -2.98 | -3.35 | 0.37  |
| 2,3-Butanedione                          | -3.39 | -3.93 | 0.54  |
| 2,3-Butyl dinitrate                      | -2.48 | -2.69 | 0.21  |
| 2,3-Butyleneglycol                       | -6.44 | -5.97 | -0.47 |
| 2,3-Dibromo-7,8-dichlorodibenzo-p-dioxin | -3.9  | -3.89 | -0.01 |
| 2,3-Dichloro-1.4-naphthoquinone          | -5.03 | -5.38 | 0.35  |
| 2,3-Dichloroanisole                      | -1.74 | -1.82 | 0.08  |

|                                    |       |       |       |
|------------------------------------|-------|-------|-------|
| 2,3'-Dichlorobiphenyl              | -1.87 | -2.41 | 0.54  |
| 2,3-Dichlorobiphenyl               | -2.03 | -2.41 | 0.38  |
| 2,3-Dichlorobutane                 | -0.57 | -1.12 | 0.55  |
| 2,3-Dichlorodibenzofuran           | -2.71 | -3.28 | 0.57  |
| 2,3-Dichlorodibenzo-p-dioxin       | -2.82 | -3.33 | 0.51  |
| 2,3-Dichloronitrobenzene           | -3.57 | -2.78 | -0.79 |
| 2,3-Dichlorophenol                 | -3.39 | -3.99 | 0.60  |
| 2,3-Dichloropropene                | -0.77 | -0.48 | -0.29 |
| 2,3-Diethyl-5-methylpyrazine       | -3.3  | -4.25 | 0.95  |
| 2,3-Dimethyl-1,3-butadiene         | 0.29  | 0.36  | -0.07 |
| 2,3-Dimethylbutane                 | 1.7   | 1.09  | 0.61  |
| 2,3-Dimethylheptane                | 2.34  | 1.57  | 0.77  |
| 2,3-Dimethylpentane                | 1.85  | 1.27  | 0.58  |
| 2,3-Lutidine                       | -3.54 | -2.89 | -0.65 |
| 2,3-Naphthalenediol                | -8.7  | -8    | -0.70 |
| 2,3-Xylenol                        | -4.52 | -3.98 | -0.54 |
| 2,3-Xylidine                       | -4.06 | -4.2  | 0.14  |
| 2,4,4',5-Tetrachlorobiphenyl       | -2.39 | -2.55 | 0.16  |
| 2,4,4',5-Tetrachlorodiphenyl ether | -1.67 | -2.6  | 0.93  |
| 2,4,4',6-Tetrachlorobiphenyl       | -1.77 | -2.55 | 0.78  |
| 2,4,4'-Tribromodiphenyl ether      | -3.11 | -3.16 | 0.05  |
| 2,4,4'-Trichlorobiphenyl           | -1.93 | -2.48 | 0.55  |
| 2,4,4'-Trichlorodiphenyl ether     | -1.87 | -2.53 | 0.66  |
| 2,4,5-T                            | -6.45 | -6.07 | -0.38 |
| 2,4,5-Trichlorobiphenyl            | -2.09 | -2.48 | 0.39  |
| 2,4',5-Trichlorobiphenyl           | -2.11 | -2.48 | 0.37  |
| 2,4,5-Trichlorodiphenyl ether      | -1.34 | -2.53 | 1.19  |
| 2,4',5-Trichlorodiphenyl ether     | -2.6  | -2.53 | -0.07 |
| 2,4,5-Trichlorophenol              | -3.21 | -4.05 | 0.84  |
| 2,4,5-Trichlorotoluene             | -1.21 | -1.37 | 0.16  |
| 2,4,5-Trimethylaniline             | -3.99 | -4.31 | 0.32  |
| 2,4,5-Trimethylnaphthalene         | -2.22 | -1.96 | -0.26 |
| 2,4,6-Collidine                    | -3.37 | -2.58 | -0.79 |
| 2,4,6-Tribromo-3-chloroanisole     | -1.35 | -2.61 | 1.26  |
| 2,4,6-Tribromoanisole              | -1.68 | -2.54 | 0.86  |
| 2,4,6-Tribromodiphenyl ether       | -2.93 | -3.16 | 0.23  |
| 2,4',6-Tribromodiphenyl ether      | -2.6  | -3.16 | 0.56  |
| 2,4,6-Trichloroanisole             | -1.76 | -1.89 | 0.13  |
| 2,4,6-Trichlorobiphenyl            | -1.57 | -2.48 | 0.91  |
| 2,4',6-Trichlorobiphenyl           | -1.47 | -2.48 | 1.01  |
| 2,4,6-Trichlorodibenzofuran        | -2.94 | -3.35 | 0.41  |
| 2,4,6-Trichlorophenol              | -3.3  | -4.05 | 0.75  |

|                                    |       |       |       |
|------------------------------------|-------|-------|-------|
| 2,4,6-Trichlorotoluene             | -1.21 | -1.37 | 0.16  |
| 2,4,6-Trimethyloctane              | 2.6   | 2.01  | 0.59  |
| 2,4,8-Trichlorodibenzofuran        | -2.94 | -3.35 | 0.41  |
| 2,4-Dibromo-3,5-dichloroanisole    | -1.35 | -2.4  | 1.05  |
| 2,4-Dibromo-5,6-dichloroanisole    | -1.38 | -2.4  | 1.02  |
| 2,4-Dibromoanisole                 | -2.29 | -2.26 | -0.03 |
| 2,4'-Dibromodiphenyl ether         | -2.16 | -2.88 | 0.72  |
| 2,4-Dibromodiphenyl ether          | -2.23 | -2.88 | 0.65  |
| 2,4'-Dichlorobiphenyl              | -1.94 | -2.41 | 0.47  |
| 2,4-Dichlorobiphenyl               | -1.96 | -2.41 | 0.45  |
| 2,4-Dichlorodiphenyl ether         | -2.67 | -2.46 | -0.21 |
| 2,4-Dichloronitrobenzene           | -3.14 | -2.78 | -0.36 |
| 2,4-Dichlorophenol                 | -3.74 | -3.98 | 0.24  |
| 2,4-Dichlorophenoxyacetic acid     | -7.58 | -6    | -1.58 |
| 2,4-Dichlorotoluene                | -0.83 | -1.3  | 0.47  |
| 2,4-Dimethoxyaniline               | -4.6  | -5.24 | 0.64  |
| 2,4-Dimethyl-3-pentanone           | -2.01 | -1.69 | -0.32 |
| 2,4-Dimethylheptane                | 2.29  | 1.57  | 0.72  |
| 2,4-Dimethylhexane                 | 2.16  | 1.42  | 0.74  |
| 2,4-Dimethylpentane                | 1.99  | 1.27  | 0.72  |
| 2,4-Dinitrophenol                  | -5.37 | -6.93 | 1.56  |
| 2,4-Dinitrotoluene                 | -5.15 | -4.26 | -0.89 |
| 2,4-Lutidine                       | -3.56 | -2.9  | -0.66 |
| 2,4-Xylenol                        | -4.41 | -3.98 | -0.43 |
| 2,4-Xylidine                       | -3.81 | -4.23 | 0.42  |
| 2,5-Aldehydine                     | -3.11 | -2.89 | -0.22 |
| 2,5-Dichlorobiphenyl               | -1.76 | -2.41 | 0.65  |
| 2,5-Dimethyl-2,4-hexadiene         | 0.28  | 0.06  | 0.22  |
| 2,5-Dimethylheptane                | 2.3   | 1.57  | 0.73  |
| 2,5-Dimethylhexane                 | 2.17  | 1.42  | 0.75  |
| 2,5-Dimethylpyrazine               | -4.25 | -4.53 | 0.28  |
| 2,5-Dinitrophenol                  | -5.5  | -4.92 | -0.58 |
| 2,5-Dinitrotoluene                 | -5.07 | -4.3  | -0.77 |
| 2,5-Furandione                     | -5.71 | -4.23 | -1.48 |
| 2,5-Hexanediol                     | -6.1  | -5.99 | -0.11 |
| 2,5-Hexyl dinitrate                | -2.89 | -2.67 | -0.22 |
| 2,5-Lutidine                       | -3.46 | -2.89 | -0.57 |
| 2,5-Xylenol                        | -4.34 | -3.98 | -0.36 |
| 2,5-Xylidine                       | -3.79 | -4.2  | 0.41  |
| 2,6-Dibromo-3,4,5-trichloroanisole | -1.33 | -2.47 | 1.14  |
| 2,6-Dibromo-3-chloroanisole        | -1.29 | -2.31 | 1.02  |
| 2,6-Dibromo-4-chloroanisole        | -1.44 | -2.33 | 0.89  |

|                                  |       |       |       |
|----------------------------------|-------|-------|-------|
| 2,6-Dibromoanisole               | -1.95 | -2.26 | 0.31  |
| 2,6-Dibromodiphenyl ether        | -2.31 | -2.88 | 0.57  |
| 2,6-Dichloro-4-nitroaniline      | -5.46 | -5.77 | 0.31  |
| 2,6-Dichloroanisole              | -1.34 | -1.82 | 0.48  |
| 2,6-Dichlorobenzonitrile         | -3.08 | -3.07 | -0.01 |
| 2,6-Dichlorobiphenyl             | -1.9  | -2.41 | 0.51  |
| 2,6-Dichlorodiphenyl ether       | -2.09 | -2.46 | 0.37  |
| 2,6-Dichlorophenol               | -3.36 | -3.98 | 0.62  |
| 2,6-Dichlorosyringaldehyde       | -5.83 | -7.29 | 1.46  |
| 2,6-Dichlorotoluene              | -1.07 | -1.3  | 0.23  |
| 2,6-Diethylaniline               | -3.5  | -4.23 | 0.73  |
| 2,6-Diisopropylnaphthalene       | -1.47 | -1.42 | -0.05 |
| 2,6-Dimethoxyphenol              | -5.09 | -5.02 | -0.07 |
| 2,6-Dimethylheptan-4-one         | -1.87 | -1.69 | -0.18 |
| 2,6-Dimethylheptane              | 2.32  | 1.57  | 0.75  |
| 2,6-Dimethylnaphthalene          | -1.93 | -2.03 | 0.10  |
| 2,6-Dimethyl-N-nitrosomorpholine | -4.96 | -5.11 | 0.15  |
| 2,6-Dimethylpyrazine             | -3.38 | -4.53 | 1.15  |
| 2,6-Dinitro-4-methylphenol       | -5.57 | -5.05 | -0.52 |
| 2,6-Dinitrotoluene               | -5.05 | -4.26 | -0.79 |
| 2,6-Lutidine                     | -3.37 | -2.51 | -0.86 |
| 2,6-Xylenol                      | -3.86 | -3.98 | 0.12  |
| 2,6-Xylidine                     | -3.82 | -4.23 | 0.41  |
| 2,7-Dichlorodibenzofuran         | -2.7  | -3.28 | 0.58  |
| 2,7-Dichlorodibenzo-p-dioxin     | -2.8  | -3.33 | 0.53  |
| 2,7-Dichloronaphthalene          | -1.89 | -2.63 | 0.74  |
| 2,7-Dimethylnaphthalene          | -1.69 | -1.94 | 0.25  |
| 2,7-Dimethyloctane               | 2.53  | 1.72  | 0.81  |
| 2,8-Dichlorodibenzofuran         | -2.71 | -3.28 | 0.57  |
| 2,8-Dichlorodibenzo-p-dioxin     | -2.8  | -3.33 | 0.53  |
| 2,5-Dichloronitrobenzene         | -3.31 | -2.78 | -0.53 |
| 2-Aminoanthraquinone             | -8.43 | -9.93 | 1.50  |
| 2-Anisaldehyde                   | -4.37 | -3.84 | -0.53 |
| 2-Bromo-3,4,5-trichloroanisole   | -1.39 | -2.19 | 0.80  |
| 2-Bromo-3,5-dichloroanisole      | -1.44 | -2.12 | 0.68  |
| 2-Bromo-3,6-dichloroanisole      | -1.25 | -2.1  | 0.85  |
| 2-Bromo-4-chloroanisole          | -1.65 | -2.05 | 0.40  |
| 2-Bromo-6-chloroanisole          | -1.53 | -2.05 | 0.52  |
| 2-Bromoanisole                   | -1.86 | -1.96 | 0.10  |
| 2-Bromobutane                    | -0.33 | -0.55 | 0.22  |
| 2-Bromoisopropylbenzene          | -0.62 | -1.29 | 0.67  |
| 2-Bromonaphthalene               | -2.03 | -2.78 | 0.75  |

|                                      |       |       |       |
|--------------------------------------|-------|-------|-------|
| 2-Bromopropane                       | -0.35 | -0.55 | 0.20  |
| 2-Bromotoluene                       | -1.01 | -1.44 | 0.43  |
| 2-Butanol                            | -3.37 | -3.1  | -0.27 |
| 2-Butanone                           | -2.63 | -1.98 | -0.65 |
| 2-Butylamine                         | -3    | -2.93 | -0.07 |
| 2-Chloro-1,1-dimethoxyethane         | -2.9  | -3.4  | 0.50  |
| 2-Chloro-2-methylbutane              | 0.12  | 0.23  | -0.11 |
| 2-Chloro-2-methylpropane             | 0.01  | 0.15  | -0.14 |
| 2-Chloro-4-nitroaniline              | -6.41 | -5.7  | -0.71 |
| 2-Chloro-6-(trichloromethyl)pyridine | -3.25 | -2.89 | -0.36 |
| 2-Chloroaniline                      | -3.6  | -4.13 | 0.53  |
| 2-Chloroanisole                      | -2.42 | -1.75 | -0.67 |
| 2-Chlorobiphenyl                     | -1.87 | -2.34 | 0.47  |
| 2-Chlorobutane                       | -0.01 | -0.59 | 0.58  |
| 2-Chlorodibenzofuran                 | -2.38 | -3.21 | 0.83  |
| 2-Chlorodibenzo-p-dioxin             | -2.51 | -3.26 | 0.75  |
| 2-Chlorodiphenyl ether               | -1.89 | -2.39 | 0.50  |
| 2-Chloroethanol                      | -4.27 | -4.12 | -0.15 |
| 2-Chloroethyl vinyl ether            | -1.48 | -1.08 | -0.40 |
| 2-Chloronaphthalene                  | -1.87 | -2.56 | 0.69  |
| 2-Chloronitrobenzene                 | -2.74 | -2.71 | -0.03 |
| 2-Chloropentane                      | 0.05  | -0.59 | 0.64  |
| 2-Chlorophenol                       | -3.34 | -3.91 | 0.57  |
| 2-Chloropropane                      | -0.15 | -0.57 | 0.42  |
| 2-Chloropyridine                     | -3.22 | -2.83 | -0.39 |
| 2-Chlorosyringaldehyde               | -5.35 | -7.22 | 1.87  |
| 2-Chlorotoluene                      | -0.77 | -1.23 | 0.46  |
| 2-Decanone                           | -1.72 | -1.92 | 0.20  |
| 2-Ethoxyethanol                      | -4.72 | -4.59 | -0.13 |
| 2-Ethoxyethylacetate                 | -3.87 | -3.26 | -0.61 |
| 2-Ethyl-2-hexenal                    | -2.04 | -2.3  | 0.26  |
| 2-Ethyl-3-methoxypyrazine            | -3.22 | -3.99 | 0.77  |
| 2-Ethyl-6-methylaniline              | -3.62 | -4.23 | 0.61  |
| 2-Ethylaniline                       | -3.81 | -4.12 | 0.31  |
| 2-Ethylbutanoic acid                 | -4.19 | -4.19 | 0.00  |
| 2-Ethylhexanal                       | -1.38 | -1.93 | 0.55  |
| 2-Ethylhexanoic acid                 | -3.74 | -4.17 | 0.43  |
| 2-Ethylhexyl acetate                 | -1.93 | -1.94 | 0.01  |
| 2-Ethylhexyl acrylate                | -1.3  | -1.94 | 0.64  |
| 2-Ethylhexylamine                    | -2.41 | -3.08 | 0.67  |
| 2-Ethyl-naphthalene                  | -1.66 | -1.95 | 0.29  |
| 2-Ethylpyridine                      | -3.17 | -2.8  | -0.37 |

|                              |       |       |       |
|------------------------------|-------|-------|-------|
| 2-Ethyltoluene               | -0.65 | -0.77 | 0.12  |
| 2-Fluoroaniline              | -3.53 | -3.86 | 0.33  |
| 2-Fluoroethanol              | -2.9  | -3.26 | 0.36  |
| 2-Fluorophenol               | -3.88 | -3.64 | -0.24 |
| 2-Heptanol                   | -2.86 | -3.07 | 0.21  |
| 2-Heptanone                  | -2.23 | -1.95 | -0.28 |
| 2-Heptenal                   | -2.56 | -2.32 | -0.24 |
| 2-Heptyne                    | 0.36  | -0.6  | 0.96  |
| 2-Hydroxy-3-butyl nitrate    | -5.39 | -4.43 | -0.96 |
| 2-Hydroxyacetophenone        | -3.39 | -3.83 | 0.44  |
| 2-Hydroxyanthraquinone       | -9.05 | -9.7  | 0.65  |
| 2-Hydroxybenzaldehyde        | -3.14 | -3.95 | 0.81  |
| 2-Hydroxyethylmethacrylate   | -5.06 | -5.4  | 0.34  |
| 2-Iodophenol                 | -4.55 | -4.66 | 0.11  |
| 2-Isobutyl-3-methoxypyrazine | -2.7  | -3.83 | 1.13  |
| 2-Isopropoxyethanol          | -4.43 | -4.33 | -0.10 |
| 2-Isopropyl-5-methylphenol   | -3.82 | -3.83 | 0.01  |
| 2-Isopropylaniline           | -3.57 | -4.01 | 0.44  |
| 2-Isopropyl-naphthalene      | -1.26 | -1.66 | 0.40  |
| 2-Isopropyltoluene           | -0.6  | -0.58 | -0.02 |
| 2-Methoxyacetophenone        | -4.6  | -3.69 | -0.91 |
| 2-Methoxyaniline             | -4.24 | -4.65 | 0.41  |
| 2-Methoxyethyl acetate       | -4.05 | -3.42 | -0.63 |
| 2-Methoxyethylamine          | -4.79 | -4.59 | -0.20 |
| 2-Methoxynitrobenzene        | -3.79 | -3.23 | -0.56 |
| 2-Methoxy-p-cresol           | -4.25 | -4.52 | 0.27  |
| 2-Methoxyphenol              | -4.09 | -4.43 | 0.34  |
| 2-Methyl valeraldehyde       | -1.67 | -1.95 | 0.28  |
| 2-Methyl-1-pentene           | 1.08  | 0.33  | 0.75  |
| 2-Methyl-1-propanol          | -3.31 | -3.25 | -0.06 |
| 2-Methyl-2-butanol           | -3.25 | -3.07 | -0.18 |
| 2-Methyl-2-propanol          | -3.29 | -3.08 | -0.21 |
| 2-Methyl-3-hexyne            | 0.27  | -0.46 | 0.73  |
| 2-Methyl-5-vinylpyridine     | -3.75 | -2.88 | -0.87 |
| 2-Methyl-6-nitrophenol       | -2.72 | -3.44 | 0.72  |
| 2-Methylacrylonitrile        | -2.06 | -1.8  | -0.26 |
| 2-Methylbenzaldehyde         | -2.87 | -3.3  | 0.43  |
| 2-Methylbutyraldehyde        | -1.76 | -1.96 | 0.20  |
| 2-Methylbutyric acid         | -4.22 | -4.21 | -0.01 |
| 2-Methylfuran                | -0.57 | -0.92 | 0.35  |
| 2-Methylheptane              | 2.15  | 1.28  | 0.87  |
| 2-Methylhexane               | 2.11  | 1.13  | 0.98  |



|                                                        |       |       |       |
|--------------------------------------------------------|-------|-------|-------|
| 2-Methylnaphthalene                                    | -1.89 | -2.01 | 0.12  |
| 2-Methylpentane                                        | 1.84  | 0.98  | 0.86  |
| 2-Methylpropanal                                       | -2.1  | -1.97 | -0.13 |
| 2-Methylpropane                                        | 1.65  | 0.66  | 0.99  |
| 2-Methylpropanoic acid                                 | -4.44 | -4.21 | -0.23 |
| 2-Methylpropenoic acid                                 | -4.8  | -4.34 | -0.46 |
| 2-Methylpyrazine                                       | -4.05 | -4.83 | 0.78  |
| 2-Methylquinoline                                      | -4.53 | -3.71 | -0.82 |
| 2-Methyltetrahydrofuran                                | -2.42 | -1.76 | -0.66 |
| 2-Methylthiophene                                      | -1.01 | -1.08 | 0.07  |
| 2-Naphthol                                             | -5.95 | -5.24 | -0.71 |
| 2-Naphthoxyacetic acid                                 | -8.94 | -7.26 | -1.68 |
| 2-Naphthylamine                                        | -5.48 | -5.46 | -0.02 |
| 2-n-Hexoxyethanol                                      | -3.91 | -4.62 | 0.71  |
| 2-Nitroaniline                                         | -4.77 | -3.59 | -1.18 |
| 2-Nitrooxyethanol                                      | -5.98 | -5.01 | -0.97 |
| 2-Nitrophenol                                          | -3.36 | -3.37 | 0.01  |
| 2-Nitrotoluene                                         | -2.63 | -2.71 | 0.08  |
| 2-Nonanone                                             | -1.9  | -1.93 | 0.03  |
| 2-Nonenal                                              | -2.36 | -2.32 | -0.04 |
| 2-Octanol                                              | -2.82 | -3.06 | 0.24  |
| 2-Octanone                                             | -2.11 | -1.94 | -0.17 |
| 2-Pentyl nitrate                                       | -0.91 | -1.35 | 0.44  |
| 2-Phenoxyethanol                                       | -4.88 | -4.9  | 0.02  |
| 2-Picoline                                             | -3.39 | -2.81 | -0.58 |
| 2-Propanol                                             | -3.47 | -3.11 | -0.36 |
| 2-Propynyl-(2E,4E)-3,7,11-trimethyl-2,4-dodecadienoate | -2.65 | -2.8  | 0.15  |
| 2-s-Butylphenol                                        | -3.47 | -3.75 | 0.28  |
| 2-Tolunitrile                                          | -3.28 | -3    | -0.28 |
| 2-Undecanone                                           | -1.67 | -1.91 | 0.24  |
| 3-(Chloromethyl)heptane                                | 0.61  | -0.58 | 1.19  |
| 3,3',4,4',5,5'-Hexachlorobiphenyl                      | -2.99 | -2.69 | -0.30 |
| 3,3',4,4',5-Pentabromodiphenyl ether                   | -3.14 | -3.72 | 0.58  |
| 3,3',4,4',5-Pentachlorodiphenyl ether                  | -1.39 | -2.67 | 1.28  |
| 3,3',4,4'-Tetrabromodiphenyl ether                     | -3.31 | -3.44 | 0.13  |
| 3,3',4,4'-Tetrachlorobiphenyl                          | -2.75 | -2.55 | -0.20 |
| 3,3',4,4'-Tetrachlorodiphenyl ether                    | -2.01 | -2.6  | 0.59  |
| 3,3',4,5'-Tetrachlorobiphenyl                          | -2.43 | -2.58 | 0.15  |
| 3,3',4-Tribromodiphenyl ether                          | -2.47 | -3.16 | 0.69  |
| 3,3',5,5'-Tetrachlorobiphenyl                          | -1.99 | -2.55 | 0.56  |
| 3,3',5-Trichlorobiphenyl                               | -2.16 | -2.48 | 0.32  |
| 3,3'-Dichlorobiphenyl                                  | -2.02 | -2.41 | 0.39  |

|                                      |       |       |       |
|--------------------------------------|-------|-------|-------|
| 3,3-Dimethylheptane                  | 2.34  | 1.76  | 0.58  |
| 3,3-Dimethylpentane                  | 1.88  | 1.46  | 0.42  |
| 3,4,4'-Tribromodiphenyl ether        | -2.35 | -3.16 | 0.81  |
| 3,4,4'-Trichlorobiphenyl             | -2.39 | -2.48 | 0.09  |
| 3,4,5,6-Tetrachloroguaiacol          | -3.39 | -4.71 | 1.32  |
| 3,4,5-Trichlorocatechol              | -5.78 | -6.8  | 1.02  |
| 3,4,5-Trichloroguaiacol              | -4.32 | -4.64 | 0.32  |
| 3,4,5-Trichloroveratrole             | -2.82 | -2.48 | -0.34 |
| 3,4'-Dibromodiphenyl ether           | -2.13 | -2.88 | 0.75  |
| 3,4-Dibromodiphenyl ether            | -1.91 | -2.88 | 0.97  |
| 3,4-Dichloro-1-butene                | -1.15 | -1.3  | 0.15  |
| 3,4-Dichloroaniline                  | -4.48 | -4.2  | -0.28 |
| 3,4'-Dichlorobiphenyl                | -2.17 | -2.41 | 0.24  |
| 3,4-Dichlorobiphenyl                 | -2.24 | -2.41 | 0.17  |
| 3,4-Dichloronitrobenzene             | -3.48 | -2.78 | -0.70 |
| 3,4-Dichlorotoluene                  | -0.97 | -1.3  | 0.33  |
| 3,4-Dimethylhexane                   | 2.22  | 1.42  | 0.80  |
| 3,4-Dimethylphenyl N-methylcarbamate | -5.35 | -5.9  | 0.55  |
| 3,4-Lutidine                         | -3.83 | -3.27 | -0.56 |
| 3,4-Xylenol                          | -4.77 | -3.98 | -0.79 |
| 3,4-Xylidine                         | -4.12 | -4.2  | 0.08  |
| 3,5-Dibromo-4-hydroxybenzonitrile    | -6.38 | -6.24 | -0.14 |
| 3,5-Dichloroanisole                  | -0.97 | -1.84 | 0.87  |
| 3,5-Dichlorobiphenyl                 | -1.89 | -2.41 | 0.52  |
| 3,5-Dichlorophenol                   | -4.86 | -3.97 | -0.89 |
| 3,5-Dimethylheptane                  | 2.29  | 1.57  | 0.72  |
| 3,5-Lutidine                         | -3.55 | -3.27 | -0.28 |
| 3,5-Xylenol                          | -4.6  | -3.98 | -0.62 |
| 3,6-Dichlorodibenzofuran             | -2.72 | -3.28 | 0.56  |
| 3,6-Dichloropicolinic acid           | -6.91 | -6.91 | 0.00  |
| 3-Acetylpyridine                     | -6.06 | -5.12 | -0.94 |
| 3-Anisaldehyde                       | -4.07 | -3.84 | -0.23 |
| 3-Bromo-1-propanol                   | -5.08 | -4.37 | -0.71 |
| 3-Bromoanisole                       | -1.39 | -1.98 | 0.59  |
| 3-Bromonitrobenzene                  | -4.12 | -2.92 | -1.20 |
| 3-Bromopropyne                       | -1.34 | -1.66 | 0.32  |
| 3-Bromopyridine                      | -3.32 | -3.39 | 0.07  |
| 3-Bromotoluene                       | -0.57 | -1.44 | 0.87  |
| 3-Buten-2-one                        | -3    | -1.96 | -1.04 |
| 3-Carene                             | 0.15  | -0.36 | 0.51  |
| 3-Chloro-1-butene                    | -0.14 | -0.58 | 0.44  |
| 3-Chloro-1-propanol                  | -4.51 | -4.11 | -0.40 |

|                                 |       |       |       |
|---------------------------------|-------|-------|-------|
| 3-Chloro-2-butanone             | -2.37 | -2.51 | 0.14  |
| 3-Chloro-4-methylaniline        | -4.14 | -4.22 | 0.08  |
| 3-Chloroaniline                 | -4.27 | -4.13 | -0.14 |
| 3-Chloroanisole                 | -2.06 | -1.75 | -0.31 |
| 3-Chlorobiphenyl                | -1.93 | -2.34 | 0.41  |
| 3-Chlorodibenzofuran            | -2.38 | -3.21 | 0.83  |
| 3-Chloronitrobenzene            | -3.54 | -2.71 | -0.83 |
| 3-Chloropentane                 | 0.05  | -0.59 | 0.64  |
| 3-Chlorophenol                  | -4.85 | -3.91 | -0.94 |
| 3-Chloropyridine                | -2.94 | -3.18 | 0.24  |
| 3-Chlorotoluene                 | -0.83 | -1.23 | 0.40  |
| 3-Cyanophenol                   | -6.97 | -5.67 | -1.30 |
| 3-Ethylheptane                  | 2.33  | 1.43  | 0.90  |
| 3-Ethylhexane                   | 2.24  | 1.28  | 0.96  |
| 3-Ethylphenol                   | -4.59 | -3.9  | -0.69 |
| 3-Ethylpyridine                 | -3.37 | -3.19 | -0.18 |
| 3-Heptanol                      | -2.91 | -3.07 | 0.16  |
| 3-Heptanone                     | -2.31 | -1.95 | -0.36 |
| 3-Hexyne                        | -0.13 | -0.66 | 0.53  |
| 3-Hydroxybenzaldehyde           | -6.99 | -5.99 | -1.00 |
| 3-Isopropylbiphenyl             | -1.16 | -1.34 | 0.18  |
| 3-Isopropylhexane               | 2.34  | 1.57  | 0.77  |
| 3-Isopropyltoluene              | -0.53 | -0.52 | -0.01 |
| 3-Methoxy-4-hydroxybenzaldehyde | -6.4  | -6.57 | 0.17  |
| 3-Methoxyacetophenone           | -4.64 | -3.69 | -0.95 |
| 3-Methoxyphenol                 | -5.63 | -4.43 | -1.20 |
| 3-Methyl-1-butene               | 1.34  | 0.39  | 0.95  |
| 3-Methyl-2-butanol              | -3.13 | -2.96 | -0.17 |
| 3-Methyl-2-butanone             | -2.38 | -1.84 | -0.54 |
| 3-Methyl-2-nitrophenol          | -3.8  | -3.49 | -0.31 |
| 3-Methyl-2-pentanone            | -2.28 | -1.83 | -0.45 |
| 3-Methyl-4-nitrophenol          | -6    | -5.49 | -0.51 |
| 3-Methylbenzaldehyde            | -2.9  | -3.32 | 0.42  |
| 3-Methylbutanoic acid           | -4.47 | -4.2  | -0.27 |
| 3-Methylbutyl nitrate           | -1.05 | -1.52 | 0.47  |
| 3-Methylheptane                 | 2.12  | 1.28  | 0.84  |
| 3-Methylhexane                  | 1.99  | 1.13  | 0.86  |
| 3-Methylnonane                  | 2.39  | 1.58  | 0.81  |
| 3-Methylpentane                 | 1.83  | 0.96  | 0.87  |
| 3-Methylpyridine                | -3.5  | -3.18 | -0.32 |
| 3-Methylstyrene                 | -0.87 | -0.78 | -0.09 |
| 3-Methyltetrahydropyran         | -2.09 | -1.93 | -0.16 |

|                                                   |       |       |       |
|---------------------------------------------------|-------|-------|-------|
| 3-Methylthiophene                                 | -0.53 | -0.55 | 0.02  |
| 3-Nitroaniline                                    | -6.49 | -5.61 | -0.88 |
| 3-Nitrophenol                                     | -7.05 | -5.38 | -1.67 |
| 3-Nitrotoluene                                    | -2.84 | -2.71 | -0.13 |
| 3-Octanone                                        | -2.06 | -1.97 | -0.09 |
| 3-Pentanol                                        | -3.19 | -3.09 | -0.10 |
| 3-Pentyl nitrate                                  | -0.95 | -1.35 | 0.40  |
| 3-Propyltoluene                                   | -0.26 | -0.66 | 0.40  |
| 3-Pyridinecarbonitrile                            | -4.95 | -4.95 | 0.00  |
| 3-Pyridinecarboxaldehyde                          | -5.21 | -5.25 | 0.04  |
| 3-Trifluoromethylaniline                          | -2.98 | -3.57 | 0.59  |
| 4-(2,4-Dichlorophenoxy)butyric acid               | -6.83 | -5.98 | -0.85 |
| 4,4'-Bipyridine                                   | -6.75 | -6.32 | -0.43 |
| 4,4'-Dibromodiphenyl ether                        | -2.78 | -2.88 | 0.10  |
| 4,4'-Dichlorobiphenyl                             | -2.07 | -2.41 | 0.34  |
| 4,4-Diethylheptane                                | 2.62  | 2.04  | 0.58  |
| 4,4-Dimethylheptane                               | 2.34  | 1.76  | 0.58  |
| 4,5,6-Trichloroguaiacol                           | -2.96 | -4.64 | 1.68  |
| 4,5-Dichlorocatechol                              | -6.5  | -6.72 | 0.22  |
| 4,5-Dichloroguaiacol                              | -3.75 | -4.57 | 0.82  |
| 4,6-Dinitro-o-cresol                              | -4.9  | -4.99 | 0.09  |
| 4-Acetylanisole                                   | -4.68 | -3.69 | -0.99 |
| 4-Acetylpyridine                                  | -5.59 | -5.12 | -0.47 |
| 4-Allyl-2-methoxyphenol                           | -4.1  | -4.49 | 0.39  |
| 4-Amino-2,6-dinitrotoluene                        | -7.26 | -7.27 | 0.01  |
| 4-Amino-3,5,6-trichloro-2-pyridinecarboxylic acid | -9.95 | -9.95 | 0.00  |
| 4-Amino-4'-nitroazobenzene                        | -8.14 | -8.99 | 0.85  |
| 4-Aminopyridine                                   | -8.02 | -6.07 | -1.95 |
| 4-Bromo-2,3,5,6-tetrachloroanisole                | -1.36 | -2.26 | 0.90  |
| 4-Bromo-2,6-dichloroanisole                       | -1.47 | -2.12 | 0.65  |
| 4-Bromo-2-chloroanisole                           | -1.5  | -2.05 | 0.55  |
| 4-Bromoanisole                                    | -1.42 | -1.98 | 0.56  |
| 4-Bromobiphenyl                                   | -2.14 | -2.55 | 0.41  |
| 4-Bromodiphenyl ether                             | -2.09 | -2.61 | 0.52  |
| 4-Bromiodobenzene                                 | -1.56 | -2.2  | 0.64  |
| 4-Bromophenol                                     | -5.23 | -4.12 | -1.11 |
| 4-Bromotoluene                                    | -0.95 | -1.44 | 0.49  |
| 4-Carboxyphenol                                   | -9.54 | -8.22 | -1.32 |
| 4-Chloro-2-methylphenol                           | -4.33 | -3.98 | -0.35 |
| 4-Chloro-2-nitrophenol                            | -3.29 | -3.44 | 0.15  |
| 4-Chloro-6-nitro-m-cresol                         | -2.95 | -3.51 | 0.56  |
| 4-Chloroaniline                                   | -4.33 | -4.13 | -0.20 |

|                               |       |       |       |
|-------------------------------|-------|-------|-------|
| 4-Chloroanisole               | -2.13 | -1.75 | -0.38 |
| 4-Chloroazobenzene            | -4.26 | -4.53 | 0.27  |
| 4-Chlorobiphenyl              | -2.01 | -2.34 | 0.33  |
| 4-Chlorodiphenyl ether        | -2.44 | -2.39 | -0.05 |
| 4-Chloriodobenzene            | -1.23 | -1.99 | 0.76  |
| 4-Chloro-m-cresol             | -4    | -3.98 | -0.02 |
| 4-Chloronitrobenzene          | -3.2  | -2.71 | -0.49 |
| 4-Chlorophenol                | -5.16 | -3.91 | -1.25 |
| 4-Chlorotoluene               | -0.86 | -1.23 | 0.37  |
| 4-Cyanopyridine               | -4.42 | -4.95 | 0.53  |
| 4-Ethyl-2-methylhexane        | 2.3   | 1.57  | 0.73  |
| 4-Ethylaniline                | -3.8  | -4.12 | 0.32  |
| 4-Ethylheptane                | 2.31  | 1.43  | 0.88  |
| 4-Ethylphenol                 | -4.5  | -3.9  | -0.60 |
| 4-Ethylpyridine               | -3.46 | -3.17 | -0.29 |
| 4-Ethyltoluene                | -0.7  | -0.77 | 0.07  |
| 4-Fluoroaniline               | -3.76 | -3.86 | 0.10  |
| 4-Fluoriodobenzene            | -1.05 | -1.72 | 0.67  |
| 4-Fluorophenol                | -4.54 | -3.64 | -0.90 |
| 4-Heptanol                    | -2.94 | -3.07 | 0.13  |
| 4-Heptanone                   | -2.14 | -1.95 | -0.19 |
| 4-Hydroxy-3-nitrobenzaldehyde | -4.19 | -5.54 | 1.35  |
| 4-Hydroxy-4'-nitroazobenzene  | -9    | -8.76 | -0.24 |
| 4-Hydroxyazobenzene           | -7.56 | -7.21 | -0.35 |
| 4-Hydroxybenzaldehyde         | -7.68 | -5.98 | -1.70 |
| 4-Hydroxybenzonitrile         | -7.46 | -5.67 | -1.79 |
| 4-Iodophenol                  | -5.33 | -4.66 | -0.67 |
| 4-Isopropylbiphenyl           | -1.02 | -1.34 | 0.32  |
| 4-Methoxy-2-nitrophenol       | -3.95 | -4.01 | 0.06  |
| 4-Methoxyaniline              | -5.49 | -4.65 | -0.84 |
| 4-Methoxybenzaldehyde         | -4.77 | -3.82 | -0.95 |
| 4-Methyl-1-pentene            | 1.4   | 0.45  | 0.95  |
| 4-Methyl-2-nitrophenol        | -3.05 | -3.49 | 0.44  |
| 4-Methylacetophenone          | -3.45 | -3.17 | -0.28 |
| 4-Methylbenzaldehyde          | -3.08 | -3.32 | 0.24  |
| 4-Methylcyclohexanone         | -3.25 | -2.6  | -0.65 |
| 4-Methylheptane               | 2.18  | 1.28  | 0.90  |
| 4-Methylnonane                | 2.42  | 1.58  | 0.84  |
| 4-Methyloctane                | 2.61  | 1.43  | 1.18  |
| 4-Methylpent-3-en-2-one       | -2.82 | -2.15 | -0.67 |
| 4-Methylpyridine              | -3.62 | -3.18 | -0.44 |
| 4-Methylstyrene               | -0.89 | -0.78 | -0.11 |

|                                    |       |       |       |
|------------------------------------|-------|-------|-------|
| 4-Nitroaniline                     | -7.29 | -5.61 | -1.68 |
| 4-Nitroanisole                     | -4.09 | -3.23 | -0.86 |
| 4-Nitroazobenzene                  | -4.65 | -6.02 | 1.37  |
| 4-Nitrooxy-1-butanol               | -5.75 | -5.01 | -0.74 |
| 4-Nitrooxy-2-butanol               | -5.26 | -4.72 | -0.54 |
| 4-Nitrotoluene                     | -2.57 | -2.71 | 0.14  |
| 4-Nonylphenol                      | -3.8  | -3.83 | 0.03  |
| 4-Octanol                          | -2.74 | -3.06 | 0.32  |
| 4-Phenylcyclohexene                | -1.29 | -1.26 | -0.03 |
| 4-Propyloctane                     | 2.6   | 1.73  | 0.87  |
| 4-Propylphenol                     | -3.62 | -3.89 | 0.27  |
| 4-Pyridinecarboxaldehyde           | -5.14 | -5.25 | 0.11  |
| 4-s-Butyl-2-nitrophenol            | -2.3  | -3.35 | 1.05  |
| 4-t-Butylphenol                    | -4.31 | -3.42 | -0.89 |
| 4-t-Butylphenyl diphenyl phosphate | -4.44 | -5.43 | 0.99  |
| 4-t-Butylpyridine                  | -3.27 | -2.71 | -0.56 |
| 4-t-Butyltoluene                   | -0.29 | -0.19 | -0.10 |
| 4-Vinylcyclohexene                 | 0.26  | -0.37 | 0.63  |
| 4-Vinylpyridine                    | -3.4  | -3.18 | -0.22 |
| 5-Ethylidene-2-norbornene          | -0.32 | -1.04 | 0.72  |
| 5-Fluoro-2-nitrophenol             | -2.94 | -3.21 | 0.27  |
| 5-Hydroxypentyl nitrate            | -5.7  | -4.98 | -0.72 |
| 5-Isopropyl-2-methylphenol         | -3.78 | -3.87 | 0.09  |
| 5-Methyl-2-nitrophenol             | -3.12 | -3.49 | 0.37  |
| 5-Methyl-3-heptanone               | -2.09 | -1.83 | -0.26 |
| 5-Nonanone                         | -1.94 | -1.93 | -0.01 |
| 6-Bromo-2,3,4-trichloroanisole     | -1.42 | -2.19 | 0.77  |
| 6-Undecanone                       | -1.85 | -1.97 | 0.12  |
| 9,10-Anthraquinone                 | -6.02 | -6.96 | 0.94  |
| 9,10-Dihydrophenanthrene           | -2.44 | -2.32 | -0.12 |
| 9H-Fluoren-9-one                   | -4.43 | -5.03 | 0.60  |
| 9-Methyl-9H-fluorene               | -2.67 | -2.16 | -0.51 |
| Abate                              | -5.46 | -6.15 | 0.69  |
| Acenaphthene                       | -2.59 | -2.72 | 0.13  |
| Acenaphthylene                     | -2.67 | -2.91 | 0.24  |
| Acetaldehyde                       | -2.51 | -2.12 | -0.39 |
| Acetamide                          | -7.13 | -5.79 | -1.34 |
| Acetic acid                        | -5    | -4.36 | -0.64 |
| Acetic anhydride                   | -3.63 | -3.35 | -0.28 |
| Acetochlor                         | -5.75 | -5.08 | -0.67 |
| Acetol                             | -5.29 | -5.32 | 0.03  |
| Acetonitrile                       | -2.85 | -1.82 | -1.03 |

|                             |        |        |       |
|-----------------------------|--------|--------|-------|
| Acetophenone                | -3.46  | -3.1   | -0.36 |
| Acetylacetone               | -3.85  | -3.92  | 0.07  |
| Acclonifen                  | -5.66  | -4.94  | -0.72 |
| Acrinathrin                 | -4.9   | -6.71  | 1.81  |
| Acrylic acid                | -4.89  | -4.36  | -0.53 |
| Acticin                     | -5.45  | -4.76  | -0.69 |
| Alachlor                    | -5.47  | -5.18  | -0.29 |
| Aldicarb                    | -7     | -8.47  | 1.47  |
| Aldrin                      | -2.22  | -2.11  | -0.11 |
| Allyl acetate               | -2.15  | -2.07  | -0.08 |
| Allyl bromide               | -0.62  | -1.03  | 0.41  |
| Allyl chloride              | -0.42  | -0.77  | 0.35  |
| Allyl cyanide               | -2.69  | -1.81  | -0.88 |
| Allyl glycidyl ether        | -3.71  | -2.92  | -0.79 |
| Allyl methacrylate          | -2.01  | -2.04  | 0.03  |
| Allyl methyl sulfide        | -1.02  | -1.42  | 0.40  |
| Allylacetoacetate           | -4.49  | -3.99  | -0.50 |
| Allylamine                  | -3.4   | -3.27  | -0.13 |
| alpha-Farnesene             | 0.08   | 0.31   | -0.23 |
| alpha-Hexachlorocyclohexane | -4.13  | -4.04  | -0.09 |
| alpha-Humulene              | 0.14   | 0.03   | 0.11  |
| alpha-Methylstyrene         | -0.91  | -0.69  | -0.22 |
| alpha-Neoclovene            | 0.14   | -0.12  | 0.26  |
| alpha-Phellandrene          | 0.35   | -0.26  | 0.61  |
| alpha-Pinene                | 0.74   | -0.43  | 1.17  |
| alpha-Terpinene             | -0.15  | -0.45  | 0.30  |
| alpha-Terpineol             | -4.04  | -3.92  | -0.12 |
| Altosid                     | -3.56  | -3.09  | -0.47 |
| Ametryn                     | -6.74  | -6.61  | -0.13 |
| Amicarbazone                | -10.25 | -9.43  | -0.82 |
| Aminocarb                   | -6.85  | -7.63  | 0.78  |
| Aminocyclopyrachlor         | -10.5  | -11.26 | 0.76  |
| Amitraz                     | -4.5   | -5.86  | 1.36  |
| Amyl acetate                | -1.84  | -2.04  | 0.20  |
| Amyl propionate             | -1.67  | -2.03  | 0.36  |
| Amylamine                   | -3     | -3.24  | 0.24  |
| Amylbenzene                 | -0.17  | -0.57  | 0.40  |
| Ancymidol                   | -9.78  | -9.71  | -0.07 |
| Anethole                    | -2.4   | -1.98  | -0.42 |
| Aniline                     | -4.03  | -4.06  | 0.03  |
| Anisole                     | -1.86  | -1.68  | -0.18 |
| Anthracene                  | -3.1   | -3.19  | 0.09  |

|                          |        |        |       |
|--------------------------|--------|--------|-------|
| Antor                    | -6.29  | -6.93  | 0.64  |
| Arabitol                 | -15.22 | -15.18 | -0.04 |
| Arbanol                  | -3.43  | -4.72  | 1.29  |
| Atratone                 | -7.41  | -6.44  | -0.97 |
| Atrazine                 | -6.54  | -6.28  | -0.26 |
| Azaconazole              | -8.1   | -6.26  | -1.84 |
| Azepane                  | -3.6   | -3.2   | -0.40 |
| Azetidine                | -4.08  | -3.14  | -0.94 |
| Bayleton                 | -8.48  | -7.09  | -1.39 |
| Beflubutamid             | -7.35  | -7.07  | -0.28 |
| Bendiocarb               | -5.63  | -5.66  | 0.03  |
| Benodanil                | -6.93  | -7.47  | 0.54  |
| Benomyl                  | -9.7   | -8.7   | -1.00 |
| Benoxacor                | -5.3   | -5.52  | 0.22  |
| Benz[a]anthracene        | -4.39  | -4.39  | 0.00  |
| Benz[e]acephenanthrylene | -4.57  | -4.89  | 0.32  |
| Benzalchloride           | -1.79  | -1.77  | -0.02 |
| Benzaldehyde             | -3.04  | -3.23  | 0.19  |
| Benzamide                | -8     | -6.9   | -1.10 |
| Benzene                  | -0.65  | -0.79  | 0.14  |
| Benzo[a]phenanthrene     | -3.67  | -4.39  | 0.72  |
| Benzo[a]pyrene           | -4.73  | -5.57  | 0.84  |
| Benzo[b]fluorene         | -3.79  | -3.63  | -0.16 |
| Benzo[b]triphenylene     | -4.67  | -5.59  | 0.92  |
| Benzo[e]pyrene           | -4.91  | -5.57  | 0.66  |
| Benzo[f]quinoline        | -5.15  | -5.41  | 0.26  |
| Benzo[g,h,i]perylene     | -5.23  | -6.75  | 1.52  |
| Benzo[k]fluoranthene     | -4.62  | -4.89  | 0.27  |
| Benzoic acid             | -5.54  | -5.47  | -0.07 |
| Benzonitrile             | -2.86  | -2.93  | 0.07  |
| Benzophosphate           | -5.6   | -4.49  | -1.11 |
| Benzotrifluoride         | -0.17  | -0.58  | 0.41  |
| Benzoylprop-ethyl        | -7.46  | -7     | -0.46 |
| Benzpyrimoxan            | -6.42  | -7.16  | 0.74  |
| Benzthiazuron            | -9.68  | -9.65  | -0.03 |
| Benzyl acetate           | -3.34  | -3.18  | -0.16 |
| Benzyl benzoate          | -4.01  | -4.29  | 0.28  |
| Benzyl butyl phthalate   | -5.39  | -6.36  | 0.97  |
| Benzyl formate           | -3.08  | -3.01  | -0.07 |
| Benzyl methyl ether      | -2.44  | -2.48  | 0.04  |
| beta-Citronellol         | -3.14  | -3.45  | 0.31  |
| beta-HCH                 | -4.83  | -4.03  | -0.80 |



|                              |        |        |       |
|------------------------------|--------|--------|-------|
| beta-Ionone                  | -2.47  | -2.6   | 0.13  |
| beta-Phellandrene            | 0.35   | -0.07  | 0.42  |
| Bifenazate                   | -7.7   | -7.01  | -0.69 |
| Bifenox                      | -7.34  | -6.23  | -1.11 |
| Binapacryl                   | -5.73  | -6.08  | 0.35  |
| Biphenyl                     | -1.92  | -1.67  | -0.25 |
| Bis(2-chloroethyl) ether     | -2.29  | -2.68  | 0.39  |
| Bis(2-chloroethyl)ethylamine | -3.72  | -3.23  | -0.49 |
| Bitertanol                   | -10.47 | -9.66  | -0.81 |
| Borneol                      | -3.04  | -3.58  | 0.54  |
| Bromacil                     | -8.43  | -7.47  | -0.96 |
| Bromoacetic acid             | -6.57  | -5.34  | -1.23 |
| Bromobenzene                 | -1.03  | -1.37  | 0.34  |
| Bromobutide                  | -5.68  | -5.8   | 0.12  |
| Bromocyclohexane             | -1.24  | -1.36  | 0.12  |
| Bromoethane                  | -0.51  | -1.03  | 0.52  |
| Bromofenoxim                 | -10.28 | -11.35 | 1.07  |
| Bromophos                    | -2.39  | -3.25  | 0.86  |
| Bromophos-ethyl              | -2.79  | -2.99  | 0.20  |
| Bromoxynil butyrate          | -3.94  | -5.25  | 1.31  |
| Bromoxynil heptanoate        | -3.78  | -5.25  | 1.47  |
| Bromoxynil octanoate         | -3.94  | -5.25  | 1.31  |
| Buprofezin                   | -4.62  | -6.58  | 1.96  |
| Butacarb                     | -5.55  | -4.99  | -0.56 |
| Butachlor                    | -5.68  | -4.3   | -1.38 |
| Butanal                      | -2.33  | -2.1   | -0.23 |
| Butanamide                   | -6.9   | -5.77  | -1.13 |
| Butane                       | 1.53   | 0.53   | 1.00  |
| Butanedioic acid             | -10.67 | -10    | -0.67 |
| Butanoic acid                | -4.66  | -4.34  | -0.32 |
| Butenachlor                  | -5.4   | -5.28  | -0.12 |
| Butocarboxim                 | -7.41  | -6.87  | -0.54 |
| Butralin                     | -3.17  | -4.01  | 0.84  |
| Buturon                      | -7.5   | -7.26  | -0.24 |
| Butyl 4-hydroxybenzoate      | -6.21  | -5.91  | -0.30 |
| Butyl butanoate              | -1.55  | -2.04  | 0.49  |
| Butyl lactate                | -4     | -5.15  | 1.15  |
| Butyl propanoate             | -1.7   | -2.05  | 0.35  |
| Butyl vinyl ether            | -0.22  | -0.36  | 0.14  |
| Butylacetamide               | -6.83  | -5.42  | -1.41 |
| Butylate                     | -2.46  | -3.12  | 0.66  |
| Butylbenzene                 | -0.26  | -0.63  | 0.37  |

|                              |        |        |       |
|------------------------------|--------|--------|-------|
| Butylcellosolve              | -4.18  | -4.57  | 0.39  |
| Butylmethylketone            | -2.44  | -1.96  | -0.48 |
| Butylnitrate                 | -1.39  | -1.64  | 0.25  |
| Butyric acid methylester     | -2.08  | -2.18  | 0.10  |
| Butyronitrile                | -2.56  | -1.8   | -0.76 |
| Cafenstrole                  | -9.3   | -9.24  | -0.06 |
| Camphene                     | 0.23   | -0.25  | 0.48  |
| Cantharidic acid             | -13.72 | -11.86 | -1.86 |
| Capraldehyde                 | -1.3   | -2.04  | 0.74  |
| Caproic aldehyde             | -2.06  | -2.08  | 0.02  |
| Caprylene                    | 1.4    | 0.4    | 1.00  |
| Caprylic aldehyde            | -1.72  | -2.06  | 0.34  |
| Carbaril                     | -7.43  | -7.16  | -0.27 |
| Carbazole                    | -5.32  | -4.62  | -0.70 |
| Carbendazim                  | -8.62  | -8.87  | 0.25  |
| Carbetamide                  | -10.74 | -10.09 | -0.65 |
| Carbofuran                   | -7.69  | -6.7   | -0.99 |
| Carbophenothion              | -4.75  | -4.52  | -0.23 |
| Carbophos                    | -5.62  | -5.98  | 0.36  |
| Carvone                      | -3.08  | -2.72  | -0.36 |
| Cedrene                      | 0.15   | -0.22  | 0.37  |
| CGA307771                    | -7.95  | -7.99  | 0.04  |
| Chloral                      | -2.51  | -2.48  | -0.03 |
| Chloral hydrate              | -6.93  | -6.9   | -0.03 |
| Chlorbufam                   | -6.27  | -5.42  | -0.85 |
| Chlordane                    | -2.65  | -2.57  | -0.08 |
| Chlordimeform                | -4.44  | -4.58  | 0.14  |
| Chlorfenidim                 | -7.32  | -7.09  | -0.23 |
| Chlorfenprop-methyl          | -4.04  | -3.93  | -0.11 |
| Chlorimuron-ethyl            | -11    | -12.26 | 1.26  |
| Chlorinate                   | -6.45  | -6.72  | 0.27  |
| Chlormethine                 | -3.52  | -3.36  | -0.16 |
| Chlormethoxynil              | -3.1   | -4.63  | 1.53  |
| Chloroacetaldehyde           | -3.21  | -2.84  | -0.37 |
| Chloroacetamide              | -6.46  | -6.51  | 0.05  |
| Chloroacetic acid            | -6.42  | -5.08  | -1.34 |
| Chloroacetic acid ethylester | -2.79  | -2.79  | 0.00  |
| Chloroacetone                | -3.17  | -2.69  | -0.48 |
| Chloroacetonitrile           | -3.13  | -2.54  | -0.59 |
| Chlorobenzene                | -0.77  | -1.16  | 0.39  |
| Chlorobenzilate              | -5.74  | -7.54  | 1.80  |
| Chlorocyclohexane            | -0.62  | -1.39  | 0.77  |

|                                    |        |        |       |
|------------------------------------|--------|--------|-------|
| Chloroethane                       | -0.3   | -0.77  | 0.47  |
| Chloroethylene                     | -0.01  | -0.21  | 0.20  |
| Chloroneb                          | -2.38  | -2.44  | 0.06  |
| Chlorophacinone                    | -9.87  | -8.66  | -1.21 |
| Chlorophthalim                     | -6.1   | -6.75  | 0.65  |
| Chloroprene                        | -0.24  | 0.24   | -0.48 |
| Chloropropham                      | -4.76  | -4.75  | -0.01 |
| Chloropropylate                    | -6.21  | -7.26  | 1.05  |
| Chlorothalonil                     | -5.09  | -5.05  | -0.04 |
| Chloroxifenidim                    | -8     | -8.32  | 0.32  |
| Chlorpyrifos-methyl                | -3.66  | -3.28  | -0.38 |
| Chlorpyriphos                      | -3.77  | -3.02  | -0.75 |
| Chlorsulfuron                      | -11.24 | -11.23 | -0.01 |
| Chlorthion                         | -5.22  | -4.49  | -0.73 |
| Chlorthiophos                      | -3.57  | -3.71  | 0.14  |
| Chlortoluron                       | -7.67  | -7.16  | -0.51 |
| Chlozolate                         | -6.06  | -7.16  | 1.10  |
| Ciafos                             | -4.43  | -4.71  | 0.28  |
| Cimetacarb                         | -9.79  | -10.09 | 0.30  |
| Cinmethylin                        | -4.5   | -4.23  | -0.27 |
| cis- Cyclooctene                   | 0.29   | -0.56  | 0.85  |
| cis-1,2-Cyclohexyl dinitrate       | -3.5   | -3.51  | 0.01  |
| cis-1,2-Dichloroethylene           | -0.73  | -0.59  | -0.14 |
| cis-1,2-Dimethylcyclohexane        | 1.17   | 0.62   | 0.55  |
| cis-1,3-Cyclohexyl dinitrate       | -3.93  | -3.51  | -0.42 |
| cis-1,3-Dichloropropene            | -0.87  | -0.13  | -0.74 |
| cis-1,4-Dichloro-2-butene          | -1.32  | -1.7   | 0.38  |
| cis-2,4,6-Trimethyl-1,3,5-trioxane | -2.54  | -4.45  | 1.91  |
| cis-2,4-Pentyl dinitrate           | -2.73  | -2.68  | -0.05 |
| cis-2-Butene                       | 0.98   | -0.02  | 1.00  |
| cis-2-Chloro-2-butene              | -0.37  | 0.03   | -0.40 |
| cis-2-Hexene                       | 1.01   | 0.1    | 0.91  |
| cis-2-Octene                       | 1.54   | 0.22   | 1.32  |
| cis-2-Pentene                      | 0.96   | 0.04   | 0.92  |
| cis-3-Hexenyl acetate              | -1.89  | -2.29  | 0.40  |
| cis-4-Heptenal                     | -2.34  | -2.29  | -0.05 |
| cis-Nonachlor                      | -3.54  | -3.13  | -0.41 |
| Clethodim                          | -7.87  | -6.93  | -0.94 |
| Clodinafop-propargyl               | -6.95  | -5.61  | -1.34 |
| Cloethocarb                        | -8.94  | -8.26  | -0.68 |
| Clofenotane                        | -3.47  | -2.62  | -0.85 |
| Clofenvinfos                       | -6.06  | -5.16  | -0.90 |

|                      |        |        |       |
|----------------------|--------|--------|-------|
| Cloquintocet-mexyl   | -5.91  | -6.3   | 0.39  |
| Codlélure            | -3.62  | -3.81  | 0.19  |
| Colamine             | -7.02  | -6.62  | -0.40 |
| Coronene             | -6.62  | -7.93  | 1.31  |
| Coumaphos            | -5.45  | -5.01  | -0.44 |
| Coumarin             | -5.34  | -3.79  | -1.55 |
| Crotonaldehyde       | -2.8   | -2.32  | -0.48 |
| Crotonic acid        | -4.76  | -4.56  | -0.20 |
| Crotoxypfos          | -6.42  | -6.84  | 0.42  |
| Cumene               | -0.35  | -0.56  | 0.21  |
| Cumyluron            | -9.8   | -9.26  | -0.54 |
| Cyanazine            | -7.98  | -7.6   | -0.38 |
| Cyanoethylene        | -2.35  | -1.82  | -0.53 |
| Cycloate             | -3.51  | -3.9   | 0.39  |
| Cyclogeraniolane     | 1.64   | 1.1    | 0.54  |
| Cycloheptane         | 0.65   | 0.11   | 0.54  |
| Cycloheptene         | 0.28   | -0.6   | 0.88  |
| Cyclohexane          | 0.88   | -0.01  | 0.89  |
| Cyclohexanol         | -4.01  | -3.92  | -0.09 |
| Cyclohexanone        | -3.32  | -2.74  | -0.58 |
| Cyclohexene          | 0.07   | -0.68  | 0.75  |
| Cyclohexyl acetate   | -2.42  | -2.6   | 0.18  |
| Cyclohexyl butanoate | -2.82  | -2.6   | -0.22 |
| Cyclohexylamine      | -3.77  | -3.75  | -0.02 |
| Cyclooctane          | 0.74   | 0.23   | 0.51  |
| Cyclopentadiene      | -0.07  | -0.84  | 0.77  |
| Cyclopentane         | 0.84   | -0.13  | 0.97  |
| Cyclopentanone       | -3.32  | -2.72  | -0.60 |
| Cyclopentene         | 0.25   | -0.68  | 0.93  |
| Cyclopropane         | 0.53   | -0.37  | 0.90  |
| Cycloxydim           | -7.26  | -8.12  | 0.86  |
| Cyenopyrafen         | -6.6   | -6.29  | -0.31 |
| Cyfluthrin           | -5.42  | -6.09  | 0.67  |
| Cyhalofop            | -8.63  | -8.46  | -0.17 |
| Cyhalofop-butyl      | -6.08  | -6.2   | 0.12  |
| Cymperator           | -5.14  | -6.24  | 1.10  |
| Cyprazine            | -7.27  | -6.72  | -0.55 |
| Cyproconazole        | -7.66  | -8.32  | 0.66  |
| Cyprodinil           | -5.46  | -6.18  | 0.72  |
| Cyprofuram           | -8.89  | -7.15  | -1.74 |
| Cyromazine           | -11.56 | -11.06 | -0.50 |
| DBCP                 | -3.09  | -2.25  | -0.84 |

|                              |       |       |       |
|------------------------------|-------|-------|-------|
| DCPA                         | -4.25 | -5.82 | 1.57  |
| DDD                          | -3.57 | -2.85 | -0.72 |
| DDE                          | -2.77 | -2.76 | -0.01 |
| Decabromodiphenyl ether      | -5.09 | -5.12 | 0.03  |
| Decamethylcyclopentasiloxane | 3.16  | 2.97  | 0.19  |
| Decane                       | 2.32  | 1.43  | 0.89  |
| Decylbenzene                 | 0.56  | -0.27 | 0.83  |
| DEHP                         | -3.57 | -4.91 | 1.34  |
| delta-HCH                    | -4.76 | -4.03 | -0.73 |
| Demeton-O                    | -4.01 | -3.35 | -0.66 |
| Desmedipham                  | -9.76 | -9.66 | -0.10 |
| Devrinol                     | -7.47 | -6.97 | -0.50 |
| Diacetylene                  | -0.66 | -1.06 | 0.40  |
| Diallyl sulfide              | -1.01 | -1.31 | 0.30  |
| Diallylamine                 | -3    | -2.39 | -0.61 |
| Diamylamine                  | -2.19 | -2.32 | 0.13  |
| Dibenz[a,h]anthracene        | -5.24 | -5.59 | 0.35  |
| Dibenzo[b,d]thiophene        | -2.86 | -3.45 | 0.59  |
| Dibenzo[b,e]pyridine         | -5.07 | -4.91 | -0.16 |
| Dibenzofuran                 | -2.44 | -3.14 | 0.70  |
| Dibenzo-p-dioxin             | -2.34 | -3.19 | 0.85  |
| Dibenzyl ether               | -3.57 | -3.46 | -0.11 |
| Dibutyl ether                | -0.72 | -1.2  | 0.48  |
| Dibutyl maleate              | -4.36 | -4.32 | -0.04 |
| Dibutyl phthalate            | -4.36 | -5.23 | 0.87  |
| Dibutylamine                 | -2.38 | -2.35 | -0.03 |
| Dicapthon                    | -5.01 | -4.49 | -0.52 |
| Dichlofenthion               | -2.77 | -2.76 | -0.01 |
| Dichlorfenidim               | -7.52 | -7.16 | -0.36 |
| Dichloroacetic acid          | -6.47 | -4.95 | -1.52 |
| Diclofop-methyl              | -4.9  | -4.78 | -0.12 |
| Dicofol                      | -5.22 | -5.88 | 0.66  |
| Dicyclohexyl phthalate       | -5.41 | -6.34 | 0.93  |
| Diethion                     | -4.91 | -4.67 | -0.24 |
| Diethofencarb                | -7.42 | -5.67 | -1.75 |
| Diethyl adipate              | -4.65 | -4.05 | -0.60 |
| Diethyl cellosolve           | -2.59 | -2.48 | -0.11 |
| Diethyl glutarate            | -4.62 | -4.12 | -0.50 |
| Diethyl malonate             | -3.99 | -4.08 | 0.09  |
| Diethyl oxalate              | -4.05 | -4.09 | 0.04  |
| Diethyl phthalate            | -5.13 | -5.27 | 0.14  |
| Diethyl pimelate             | -4.73 | -4.06 | -0.67 |

|                                        |        |       |       |
|----------------------------------------|--------|-------|-------|
| Diethyl succinate                      | -4.67  | -4.07 | -0.60 |
| Diethyl sulphide                       | -1.07  | -1.34 | 0.27  |
| Diethylacetaldehyde                    | -1.67  | -1.95 | 0.28  |
| Diethylamine                           | -2.98  | -2.39 | -0.59 |
| Diethylcarbonate                       | -2.43  | -2.93 | 0.50  |
| Diethylene glycol monohexyl ether      | -5.09  | -5.83 | 0.74  |
| Diethyleneglycol dinitrate             | -4.8   | -4.47 | -0.33 |
| Diethyleneglycol monobutyl ether       | -6.53  | -5.83 | -0.70 |
| Diethyleneglycol-di-n-butylether       | -3.99  | -3.69 | -0.30 |
| Diethylketone                          | -2.34  | -1.97 | -0.37 |
| Difenoconazole                         | -8.95  | -7.21 | -1.74 |
| Difenoconazole                         | -10.78 | -8.85 | -1.93 |
| Diflubenzuron                          | -7.29  | -8.42 | 1.13  |
| Dihexyl phthalate                      | -3.87  | -5.19 | 1.32  |
| Diisoamyl ether                        | -1.23  | -0.92 | -0.31 |
| Diisobutyl ether                       | -0.62  | -0.99 | 0.37  |
| Diisobutylamine                        | -2     | -2.09 | 0.09  |
| Diisobutylene                          | 2      | 0.91  | 1.09  |
| Diisopropyl ether                      | -1.05  | -0.66 | -0.39 |
| Diisopropyl sulfide                    | -0.87  | -0.41 | -0.46 |
| Diisopropylamine                       | -2.36  | -1.73 | -0.63 |
| Dimepiperate                           | -5.84  | -5.21 | -0.63 |
| Dimethachlor                           | -7     | -6.24 | -0.76 |
| Dimethenamid                           | -5.48  | -5.55 | 0.07  |
| Dimethirimol                           | -7.15  | -8.43 | 1.28  |
| Dimethoxymethane                       | -2.35  | -2.22 | -0.13 |
| Dimethyl carbonate                     | -2.7   | -3.2  | 0.50  |
| Dimethyl hexanedioate                  | -5.03  | -4.34 | -0.69 |
| Dimethyl maleate                       | -4.54  | -4.54 | 0.00  |
| Dimethyl malonate                      | -4.99  | -4.34 | -0.65 |
| Dimethyl oxalate                       | -3.92  | -4.34 | 0.42  |
| Dimethyl phthalate                     | -5.3   | -5.53 | 0.23  |
| Dimethyl sebacate                      | -4.64  | -4.29 | -0.35 |
| Dimethyl succinate                     | -4.87  | -4.33 | -0.54 |
| Dimethyl sulfide                       | -1.6   | -1.54 | -0.06 |
| Dimethyl-(2,2-dichlorovinyl) phosphate | -4.98  | -4.09 | -0.89 |
| Dimethylacetamide                      | -6.04  | -4.62 | -1.42 |
| Dimethylamine                          | -3.14  | -2.65 | -0.49 |
| Dimethylether                          | -1.39  | -1.5  | 0.11  |
| Dimethylterephthalate                  | -4.75  | -5.54 | 0.79  |
| Dimethylvinphos                        | -5.87  | -5.4  | -0.47 |
| Dimoxystrobin                          | -9.32  | -9.44 | 0.12  |

|                                 |        |        |       |
|---------------------------------|--------|--------|-------|
| Dimpylate                       | -4.22  | -4.99  | 0.77  |
| Dinitramine                     | -4.25  | -4.15  | -0.10 |
| Di-n-octyladipate               | -4.29  | -4.12  | -0.17 |
| Dinoseb                         | -4.58  | -4.83  | 0.25  |
| Dinoseb acetate                 | -6.58  | -5.85  | -0.73 |
| Dinoterb                        | -4.77  | -4.57  | -0.20 |
| Di-n-propyl phthalate           | -4.74  | -5.25  | 0.51  |
| Diofenolan                      | -5.57  | -5.69  | 0.12  |
| Dioxabenzofos                   | -2.94  | -3.51  | 0.57  |
| Dioxacarb                       | -9.22  | -9.01  | -0.21 |
| Diphenyl 2-ethylhexyl phosphate | -3.59  | -5.09  | 1.50  |
| Diphenyl ether                  | -2.01  | -2.32  | 0.31  |
| Diphenylamine                   | -3.96  | -3.8   | -0.16 |
| Diphenylcarbonate               | -3.72  | -4.5   | 0.78  |
| Diphenylmethane                 | -1.92  | -1.61  | -0.31 |
| Diphenylmethanol                | -5.97  | -5.33  | -0.64 |
| Dipropyl ether                  | -0.86  | -1.22  | 0.36  |
| Dipropyl sulfide                | -0.9   | -1.32  | 0.42  |
| Dipropylamine                   | -2.7   | -2.37  | -0.33 |
| Dipropyleneglycol dibenzoate    | -6.25  | -6.99  | 0.74  |
| Disugran                        | -6.85  | -6.2   | -0.65 |
| Disulfoton                      | -3.91  | -3.44  | -0.47 |
| Divinyl ether                   | -0.48  | 0.11   | -0.59 |
| Dodecamethylcyclohexasiloxane   | 3      | 3.71   | -0.71 |
| Dodecane                        | 2.53   | 1.73   | 0.80  |
| Dodecanedioic acid              | -9.39  | -9.92  | 0.53  |
| Drazoxolon                      | -5.54  | -6.03  | 0.49  |
| Dyrene                          | -4.6   | -3.5   | -1.10 |
| E-beta-Caryophyllene            | 0.04   | -0.06  | 0.10  |
| Empenthrin                      | -1.85  | -2.77  | 0.92  |
| Enanthic acid                   | -4.52  | -4.31  | -0.21 |
| Endrin                          | -4.7   | -3.35  | -1.35 |
| endrin aldehyde                 | -3.77  | -4.62  | 0.85  |
| Enilconazole                    | -6.71  | -5.88  | -0.83 |
| Epichlorohydrin                 | -2.86  | -2.44  | -0.42 |
| epsilon-Caprolactam             | -7.65  | -6.21  | -1.44 |
| Eradicane                       | -3.14  | -3.4   | 0.26  |
| Erythritol                      | -12.79 | -12.31 | -0.48 |
| Esbiothrin                      | -5.17  | -4.73  | -0.44 |
| Esprocarb                       | -3.66  | -4.08  | 0.42  |
| Ethametsulfuron-methyl          | -12.72 | -14.19 | 1.47  |
| Ethane                          | 1.33   | 0.23   | 1.10  |

|                                             |       |       |       |
|---------------------------------------------|-------|-------|-------|
| Ethanediol diacetate                        | -4.78 | -4.12 | -0.66 |
| Ethanol                                     | -3.62 | -3.4  | -0.22 |
| Ethene                                      | 0.83  | 0.25  | 0.58  |
| Ethiofencarb                                | -7.33 | -7.12 | -0.21 |
| Ethoxybenzene                               | -1.62 | -1.55 | -0.07 |
| Ethoxyquin                                  | -4.3  | -4.38 | 0.08  |
| Ethyl 2,4-dichlorophenoxyacetate            | -3.88 | -3.71 | -0.17 |
| Ethyl 4-(4-chloro-2-methylphenoxy)butanoate | -4.94 | -3.76 | -1.18 |
| Ethyl 4-hydroxybenzoate                     | -6.64 | -5.93 | -0.71 |
| Ethyl acetate                               | -2.21 | -2.07 | -0.14 |
| Ethyl acetoacetate                          | -4.32 | -4    | -0.32 |
| Ethyl acrylate                              | -1.99 | -2.07 | 0.08  |
| Ethyl benzoate                              | -2.67 | -3.18 | 0.51  |
| Ethyl butanoate                             | -1.86 | -2.05 | 0.19  |
| Ethyl caprylate                             | -1.44 | -2.09 | 0.65  |
| Ethyl cyanoacetate                          | -4.93 | -3.84 | -1.09 |
| Ethyl decanoate                             | -1.54 | -2.09 | 0.55  |
| Ethyl ether                                 | -1.39 | -1.24 | -0.15 |
| Ethyl formate                               | -1.93 | -1.87 | -0.06 |
| Ethyl heptanoate                            | -1.69 | -2.09 | 0.40  |
| Ethyl hexanoate                             | -1.67 | -2.03 | 0.36  |
| Ethyl iodide                                | -0.54 | -0.44 | -0.10 |
| Ethyl isovalerate                           | -1.69 | -1.92 | 0.23  |
| Ethyl methacrylate                          | -1.78 | -2.05 | 0.27  |
| Ethyl methyl sulfide                        | -1.1  | -1.43 | 0.33  |
| Ethyl pentanoate                            | -1.85 | -2.05 | 0.20  |
| Ethyl propanoate                            | -2.05 | -2.06 | 0.01  |
| Ethyl t-amyl ether                          | -1.08 | -1    | -0.08 |
| Ethyl t-butyl ether                         | -1.17 | -1    | -0.17 |
| Ethyl trans-cinnamate                       | -3.76 | -3.38 | -0.38 |
| Ethyl trifluoroacetate                      | -0.39 | -1.52 | 1.13  |
| Ethyl vanillin                              | -6.12 | -6.44 | 0.32  |
| Ethyl vinyl ether                           | -0.65 | -0.27 | -0.38 |
| Ethylamine                                  | -3.3  | -3.27 | -0.03 |
| Ethylbenzene                                | -0.54 | -0.75 | 0.21  |
| Ethylcyclohexane                            | 1.3   | 0.48  | 0.82  |
| Ethylene glycol monobutyl ether acetate     | -3.65 | -3.3  | -0.35 |
| Ethylenedichloride                          | -1.4  | -1.49 | 0.09  |
| Ethyleneglycol monobenzyl ether             | -5.31 | -6.95 | 1.64  |
| Ethylisopropylketone                        | -2.2  | -1.83 | -0.37 |
| Ethylnitrate                                | -1.6  | -1.66 | 0.06  |
| Ethylpyrazine                               | -4    | -4.83 | 0.83  |



|                       |        |        |       |
|-----------------------|--------|--------|-------|
| Ethyne                | -0.01  | -0.22  | 0.21  |
| Ethynylbenzene        | -1.6   | -1.39  | -0.21 |
| Etofenprox            | -5.26  | -4.77  | -0.49 |
| Etohexadiol           | -5.6   | -6.14  | 0.54  |
| Etrimfos              | -4.48  | -4.59  | 0.11  |
| exo-Dicyclopentadiene | -0.36  | -1.46  | 1.10  |
| Fenamidone            | -8.33  | -8.04  | -0.29 |
| Fenazaquin            | -4.68  | -4.92  | 0.24  |
| Fenbuconazole         | -7.91  | -6.9   | -1.01 |
| Fenchlorazole-ethyl   | -6.44  | -7.93  | 1.49  |
| Fenchlorphos          | -3.08  | -3.04  | -0.04 |
| Fenchol               | -2.94  | -3.58  | 0.64  |
| Fenfuram              | -7.79  | -6.43  | -1.36 |
| Fenhexamid            | -8.5   | -8.76  | 0.26  |
| Fenobucarb            | -5.57  | -5.71  | 0.14  |
| Fenothiocarb          | -6.12  | -5.18  | -0.94 |
| Fenoxycarb            | -7.79  | -7.59  | -0.20 |
| Fenpiclonil           | -6.66  | -6.85  | 0.19  |
| Fenpropimorph         | -3.7   | -3.77  | 0.07  |
| Fenthion              | -4.15  | -3.84  | -0.31 |
| Fenthoate             | -4.95  | -5.08  | 0.13  |
| Fentrazamide          | -8.1   | -8.9   | 0.80  |
| Fenvalerate           | -6.62  | -6.77  | 0.15  |
| Flamprop-M-isopropyl  | -6.16  | -6.43  | 0.27  |
| Flamprop-M-methyl     | -6.74  | -6.84  | 0.10  |
| Flonicamid            | -10.4  | -9.82  | -0.58 |
| Florpyrauxifen        | -10.89 | -11.24 | 0.35  |
| Fluacrypyrim          | -5.7   | -4.59  | -1.11 |
| Fluazifop-butyl       | -5.35  | -4.62  | -0.73 |
| Flufenoxuron          | -8.52  | -8.98  | 0.46  |
| Flufenprox            | -4.72  | -4.58  | -0.14 |
| Fluometuron           | -6.97  | -6.51  | -0.46 |
| Fluopicolide          | -7.45  | -9.01  | 1.56  |
| Fluoranthene          | -3.35  | -3.69  | 0.34  |
| Fluorene              | -2.57  | -2.43  | -0.14 |
| Fluoroacetone         | -2.96  | -1.83  | -1.13 |
| Fluorobenzene         | -0.57  | -0.89  | 0.32  |
| Fluoroethane          | -0.04  | 0.08   | -0.12 |
| Fluquinconazole       | -8.6   | -9.1   | 0.50  |
| Fluridone             | -6.84  | -6.08  | -0.76 |
| Flurochloridone       | -5.8   | -5.38  | -0.42 |
| Fluroxene             | -0.1   | 0.21   | -0.31 |

|                            |        |        |       |
|----------------------------|--------|--------|-------|
| Flurprimidol               | -7.27  | -7.87  | 0.60  |
| Flusulfamide               | -7     | -6.01  | -0.99 |
| Flutolanil                 | -7.78  | -6.34  | -1.44 |
| Flutriafol                 | -8.59  | -8.51  | -0.08 |
| Fluxofenim                 | -3.53  | -4.73  | 1.20  |
| Folbex                     | -6.31  | -7.67  | 1.36  |
| Forchlorfenuron            | -9.96  | -9.68  | -0.28 |
| Formaldehyde diethylacetal | -2.56  | -1.96  | -0.60 |
| Formic acid                | -4.91  | -4.16  | -0.75 |
| Formothion                 | -6.62  | -8.23  | 1.61  |
| Furalaxyl                  | -7.28  | -6.92  | -0.36 |
| Furan                      | -0.65  | -0.84  | 0.19  |
| Furconazole                | -6.96  | -7.15  | 0.19  |
| Furfural                   | -3.61  | -2.99  | -0.62 |
| Galaxolide                 | -2.48  | -2.72  | 0.24  |
| gamma-Terpinene            | 0.02   | -0.36  | 0.38  |
| Geranyl nitrile            | -2     | -2.16  | 0.16  |
| Glutaraldehyde             | -5.87  | -4.18  | -1.69 |
| Glycerol trinitrate        | -5.76  | -4.59  | -1.17 |
| Glyceryltriacetate         | -6.3   | -5.82  | -0.48 |
| Glycolaldehyde             | -5     | -5.47  | 0.47  |
| Glyme                      | -3.51  | -2.69  | -0.82 |
| Glyoxylic acid             | -5.44  | -6.41  | 0.97  |
| Gossypure (Z,Z)-           | -1.9   | -2.49  | 0.59  |
| Guajen                     | -2.04  | -2.03  | -0.01 |
| Halacrinat                 | -5.55  | -6.1   | 0.55  |
| Halauxifen-methyl          | -8.94  | -9.3   | 0.36  |
| Harmony                    | -12.75 | -13.28 | 0.53  |
| Hemimellitene              | -0.89  | -0.85  | -0.04 |
| Heptachlor                 | -1.91  | -2.17  | 0.26  |
| Heptachlor epoxide         | -3.45  | -3.41  | -0.04 |
| Heptane                    | 1.96   | 0.98   | 0.98  |
| Heptanedioic acid          | -10.5  | -9.97  | -0.53 |
| Heptenophos                | -5.34  | -5.28  | -0.06 |
| Heptyl bromide             | 0.25   | -0.98  | 1.23  |
| Heptylbenzene              | 0.09   | -0.45  | 0.54  |
| Heptylcyclohexane          | 1.82   | 1.23   | 0.59  |
| Heroine                    | -10.6  | -8.98  | -1.62 |
| Hexabromobenzene           | -3.01  | -2.77  | -0.24 |
| Hexachlorobenzene          | -1.21  | -1.51  | 0.30  |
| Hexachlorobutadiene        | -0.14  | -0.21  | 0.07  |
| Hexachloroethane           | -0.83  | -0.77  | -0.06 |

|                                |        |        |       |
|--------------------------------|--------|--------|-------|
| Hexachloropropylene            | -0.67  | -0.5   | -0.17 |
| Hexaconazole                   | -7.05  | -7.93  | 0.88  |
| Hexafluoro-2-propanol          | -2.39  | -1.95  | -0.44 |
| Hexafluorobenzene              | 0.13   | 0.11   | 0.02  |
| Hexafluoroethane               | 2.82   | 1.08   | 1.74  |
| Hexamethylbenzene              | -1.33  | -0.91  | -0.42 |
| Hexamethylcyclotrisiloxane     | 1.8    | 1.42   | 0.38  |
| Hexanamide                     | -6.66  | -5.78  | -0.88 |
| Hexane                         | 1.85   | 0.83   | 1.02  |
| Hexanenitrile                  | -2.42  | -1.78  | -0.64 |
| Hexazinone                     | -10.08 | -9.8   | -0.28 |
| Hexyl bromide                  | 0.13   | -0.99  | 1.12  |
| Hexylbenzene                   | -0.03  | -0.51  | 0.48  |
| Hydrocinnamyl alcohol          | -5.08  | -4.49  | -0.59 |
| Hydroprene                     | -2.1   | -2.21  | 0.11  |
| Hydroxyacetic acid             | -7.68  | -7.71  | 0.03  |
| Imazamethabenz-methyl m-isomer | -9.59  | -10.52 | 0.93  |
| Imazamox                       | -14.21 | -15.62 | 1.41  |
| Imazaquin                      | -14.55 | -15.11 | 0.56  |
| Imibenconazole                 | -8.08  | -7.88  | -0.20 |
| Imiprothrin                    | -8.61  | -9.46  | 0.85  |
| Indane                         | -1.07  | -1.49  | 0.42  |
| Indanofan                      | -7.67  | -8.17  | 0.50  |
| Indeno[1,2,3-cd]pyrene         | -4.85  | -5.9   | 1.05  |
| Indole                         | -4.97  | -4.23  | -0.74 |
| Iodobenzene                    | -1.28  | -1.91  | 0.63  |
| Ioxynil                        | -8.11  | -7.32  | -0.79 |
| Ipconazole                     | -6.99  | -8.22  | 1.23  |
| Iprovalicarb                   | -8.78  | -10.39 | 1.61  |
| Isoamyl acetate                | -1.72  | -1.91  | 0.19  |
| Isobutene                      | 0.85   | 0.17   | 0.68  |
| Isobutyl acetate               | -1.73  | -1.94  | 0.21  |
| Isobutyl acrylate              | -1.51  | -1.93  | 0.42  |
| Isobutyl bromide               | -0.02  | -0.9   | 0.88  |
| Isobutyl chloride              | -0.09  | -0.64  | 0.55  |
| Isobutyl formate               | -1.63  | -1.73  | 0.10  |
| Isobutyl isobutyrate           | -1.47  | -1.78  | 0.31  |
| Isobutyl methacrylate          | -1.67  | -1.91  | 0.24  |
| Isobutyl methyl ketone         | -2.23  | -1.83  | -0.40 |
| Isobutyl nitrate               | -1.36  | -1.52  | 0.16  |
| Isobutyl propanoate            | -1.57  | -1.92  | 0.35  |
| Isobutyl vinyl ether           | -0.82  | -0.22  | -0.60 |

|                      |        |        |       |
|----------------------|--------|--------|-------|
| Isobutylbenzene      | 0.12   | -0.5   | 0.62  |
| Isobutylpyrazine     | -3.7   | -4.67  | 0.97  |
| Isobutyronitrile     | -2.4   | -1.67  | -0.73 |
| Isocumene            | -0.37  | -0.69  | 0.32  |
| Isofetamide          | -7.94  | -8.95  | 1.01  |
| Isomethiozin         | -5.94  | -7.83  | 1.89  |
| Isooctane            | 2.12   | 1.75   | 0.37  |
| Isopentane           | 1.7    | 0.83   | 0.87  |
| Isopentene           | 1.25   | 0.27   | 0.98  |
| Isopentyl bromide    | 0.15   | -0.9   | 1.05  |
| Isopentyl formate    | -1.56  | -1.75  | 0.19  |
| Isoprene             | 0.49   | 0.22   | 0.27  |
| Isoprocarb           | -5.89  | -5.71  | -0.18 |
| Isopropazol          | -4.12  | -4.72  | 0.60  |
| Isopropyl formate    | -1.48  | -1.6   | 0.12  |
| Isopropyl propionate | -1.63  | -1.79  | 0.16  |
| Isopropylacetate     | -1.91  | -1.78  | -0.13 |
| Isopropylnitrate     | -1.18  | -1.37  | 0.19  |
| Isoproturon          | -7.94  | -6.94  | -1.00 |
| Isoquinoline         | -4.21  | -4.51  | 0.30  |
| Isosativene          | 0.01   | -0.33  | 0.34  |
| Isouron              | -7.8   | -7.98  | 0.18  |
| Isovaleraldehyde     | -1.94  | -1.98  | 0.04  |
| Isoxazole            | -2.99  | -3.35  | 0.36  |
| Jodfenphos           | -3.43  | -3.82  | 0.39  |
| Kappa-bifenthrin     | -4.39  | -3.75  | -0.64 |
| Kappa-Tefluthrin     | -1     | -1.81  | 0.81  |
| Karbutilate          | -11.64 | -10.79 | -0.85 |
| Kepone               | -5.4   | -3.99  | -1.41 |
| Kresoxim-methyl      | -6.61  | -6.02  | -0.59 |
| KTU3616              | -6.32  | -6.77  | 0.45  |
| Lactofen             | -5.8   | -7.32  | 1.52  |
| lambda-Cyhalothrin   | -4.75  | -5.2   | 0.45  |
| Lenacil              | -10.25 | -9     | -1.25 |
| Limonene oxide       | -2.58  | -2.06  | -0.52 |
| Linalool             | -3.06  | -3.31  | 0.25  |
| Lindane              | -3.57  | -4.03  | 0.46  |
| L-Menthone           | -2.15  | -2.31  | 0.16  |
| Longipinene          | 0.08   | -0.33  | 0.41  |
| Maleic hydrazide     | -10.48 | -8.62  | -1.86 |
| Malic acid           | -11.83 | -11.05 | -0.78 |
| Mandestrobin         | -9.14  | -9.46  | 0.32  |

|                                   |        |       |       |
|-----------------------------------|--------|-------|-------|
| m-Anisidine                       | -5.35  | -4.65 | -0.70 |
| m-Anthranilic acid                | -9.97  | -8.44 | -1.53 |
| MCPB                              | -7.95  | -5.98 | -1.97 |
| m-Cresol                          | -4.46  | -3.91 | -0.55 |
| Mecoprop                          | -6.8   | -5.71 | -1.09 |
| Menthol                           | -2.89  | -3.49 | 0.60  |
| Mepanipyrin                       | -6.13  | -6.54 | 0.41  |
| Meptyldinocap                     | -5.49  | -6.1  | 0.61  |
| Mercaptodimethur                  | -7     | -6.84 | -0.16 |
| Metalaxyl                         | -7.91  | -7.31 | -0.60 |
| Metamitron                        | -10.46 | -9.19 | -1.27 |
| Metaxon                           | -7.78  | -6    | -1.78 |
| Metconazole                       | -6.79  | -8.04 | 1.25  |
| Methacrifos                       | -4.21  | -3.97 | -0.24 |
| Methacrolein                      | -2.2   | -2.09 | -0.11 |
| Methanol                          | -3.75  | -3.53 | -0.22 |
| Methibenzuron                     | -7.64  | -8.19 | 0.55  |
| Methoprotryne                     | -8.06  | -7.97 | -0.09 |
| Methoxychlor                      | -5.08  | -3.66 | -1.42 |
| Methyl (Z) 9-octadecenoate        | -1.56  | -2.26 | 0.70  |
| Methyl 2,4-dichlorophenoxyacetate | -3.93  | -3.87 | -0.06 |
| Methyl 2-hydroxybenzoate          | -3.39  | -4.04 | 0.65  |
| Methyl 4-hydroxybenzoate          | -6.98  | -6.06 | -0.92 |
| Methyl acetate                    | -2.33  | -2.2  | -0.13 |
| Methyl acrylate                   | -2.09  | -2.2  | 0.11  |
| Methyl benzoate                   | -2.88  | -3.31 | 0.43  |
| Methyl cellosolve                 | -4.87  | -4.72 | -0.15 |
| Methyl cyclohexanecarboxylate     | -2.42  | -2.87 | 0.45  |
| Methyl cyclopropanecarboxylate    | -3.01  | -2.81 | -0.20 |
| Methyl decanoate                  | -1.44  | -2.12 | 0.68  |
| Methyl formate                    | -2.01  | -2    | -0.01 |
| Methyl hexanoate                  | -1.82  | -2.16 | 0.34  |
| Methyl isoamyl ketone             | -2.15  | -1.82 | -0.33 |
| Methyl laurate                    | -1.31  | -2.1  | 0.79  |
| Methyl methacrylate               | -1.88  | -2.18 | 0.30  |
| Methyl methoxyacetate             | -3.9   | -3.54 | -0.36 |
| Methyl octanoate                  | -1.5   | -2.15 | 0.65  |
| Methyl pivalate                   | -1.76  | -1.74 | -0.02 |
| Methyl propanoate                 | -2.18  | -2.19 | 0.01  |
| Methyl t-pentyl ether             | -1.05  | -1.12 | 0.07  |
| Methyl trifluoroacetate           | -1.05  | -1.62 | 0.57  |
| Methyl valerate                   | -1.89  | -2.17 | 0.28  |

|                             |        |        |       |
|-----------------------------|--------|--------|-------|
| Methyl vinyl ether          | -0.71  | -0.48  | -0.23 |
| Methylacetamide             | -6.9   | -5.55  | -1.35 |
| Methylacetoacetate          | -4.35  | -4.12  | -0.23 |
| Methylamine                 | -3.37  | -3.4   | 0.03  |
| Methylbenzene               | -0.6   | -0.81  | 0.21  |
| Methylchloroacetate         | -3.02  | -2.93  | -0.09 |
| Methylchloroform            | -0.19  | -0.41  | 0.22  |
| Methylcyanoacetate          | -4.94  | -3.97  | -0.97 |
| Methylcyclohexane           | 1.19   | 0.27   | 0.92  |
| Methylcyclopentane          | 1.13   | 0.15   | 0.98  |
| Methylnitrate               | -1.69  | -1.78  | 0.09  |
| Methylnitrophos             | -4.42  | -4.45  | 0.03  |
| Methyl-n-propylketone       | -2.47  | -1.97  | -0.50 |
| Methyloxiran                | -2.38  | -1.72  | -0.66 |
| Methylparathion             | -4.6   | -4.38  | -0.22 |
| Methyltriazothion           | -8.35  | -6.51  | -1.84 |
| Metofluthrin                | -3.46  | -4.01  | 0.55  |
| Metolachlor                 | -5.1   | -5.87  | 0.77  |
| Metolcarb                   | -5.19  | -5.83  | 0.64  |
| Metominostrobin             | -7.79  | -6.92  | -0.87 |
| Metoxuron                   | -9.03  | -7.68  | -1.35 |
| Metribuzin                  | -7.72  | -7.17  | -0.55 |
| Metsulfovax                 | -9.36  | -7.79  | -1.57 |
| Milbemectin A3              | -10.28 | -10.83 | 0.55  |
| Milbemycin A4               | -12.06 | -12.84 | 0.78  |
| Molinate                    | -4.31  | -4.27  | -0.04 |
| Monalide                    | -6.01  | -5.14  | -0.87 |
| Monocrotophos               | -10.04 | -9.5   | -0.54 |
| Morpholine                  | -5.26  | -4.44  | -0.82 |
| MTBE                        | -1.26  | -1.05  | -0.21 |
| m-Toluidine                 | -4.14  | -4.13  | -0.01 |
| Musk ketone                 | -4.38  | -5.99  | 1.61  |
| Mustard gas                 | -3     | -2.77  | -0.23 |
| Myclobutanil                | -6.77  | -6.09  | -0.68 |
| Myrcene                     | 0.42   | 0.4    | 0.02  |
| Myristyl alcohol            | -2.18  | -3.28  | 1.10  |
| N,N-Diethylaniline          | -2.26  | -2.63  | 0.37  |
| N,N-Diisopropylethanolamine | -5.07  | -4.5   | -0.57 |
| N,N-Dimethylaniline         | -2.53  | -2.89  | 0.36  |
| N,N-Dimethylbenzylamine     | -3.11  | -3.16  | 0.05  |
| N,N-Dimethylcyclohexylamine | -2.74  | -2.51  | -0.23 |
| N,N-Dimethylformamide       | -5.73  | -4.53  | -1.20 |

|                                       |       |        |       |
|---------------------------------------|-------|--------|-------|
| N,N-Dimethyloctylamine                | -1.7  | -2.03  | 0.33  |
| N,N-Dimethyl-p-toluidine              | -2.7  | -2.96  | 0.26  |
| Naphthalene                           | -1.77 | -1.99  | 0.22  |
| Naproanilide                          | -9.2  | -8.17  | -1.03 |
| n-Butyl acetate                       | -1.97 | -2.05  | 0.08  |
| n-Butyl acrylate                      | -1.72 | -2.05  | 0.33  |
| n-Butylbenzoate                       | -2.4  | -3.2   | 0.80  |
| n-Butylmethacrylate                   | -1.53 | -2.05  | 0.52  |
| n-Decanoic acid                       | -4.26 | -4.28  | 0.02  |
| n-Decyl alcohol                       | -2.67 | -3.32  | 0.65  |
| n-Decylamine                          | -2.68 | -3.19  | 0.51  |
| Neohexane                             | 1.85  | 1.29   | 0.56  |
| Neopentyl alcohol                     | -2.85 | -2.91  | 0.06  |
| Neral                                 | -2.72 | -2.48  | -0.24 |
| N-Ethylaniline                        | -3.4  | -3.69  | 0.29  |
| n-Heptaldehyde                        | -1.96 | -2.07  | 0.11  |
| n-Heptylamine                         | -2.78 | -3.22  | 0.44  |
| n-Hexanoic acid                       | -4.53 | -4.32  | -0.21 |
| n-Hexylacetate                        | -1.7  | -2.03  | 0.33  |
| n-Hexylamine                          | -2.9  | -3.23  | 0.33  |
| Niclofen                              | -3.91 | -4.01  | 0.10  |
| Nitrobenzene                          | -3.01 | -2.64  | -0.37 |
| Nitroethane                           | -2.71 | -2.26  | -0.45 |
| Nitrothal-isopropyl                   | -6.15 | -6.3   | 0.15  |
| N-Methyl-2-pyrrolidone                | -6.88 | -5.24  | -1.64 |
| N-Methyl-3,5-dimethylphenyl carbamate | -5.13 | -5.9   | 0.77  |
| N-Methylaniline                       | -3.44 | -3.82  | 0.38  |
| N-Methylformamide                     | -6.57 | -5.46  | -1.11 |
| N-Methylindole                        | -4.34 | -2.88  | -1.46 |
| N-Methylmorpholine                    | -4.37 | -3.95  | -0.42 |
| N-Methyl-N,2,4,6-tetranitroaniline    | -8.4  | -10.02 | 1.62  |
| N-Methyl-N-nitrosobenzylamine         | -3.72 | -4.98  | 1.26  |
| N-Methylpiperidine                    | -2.85 | -2.73  | -0.12 |
| N-Methylpyrrole                       | -2.15 | -2.48  | 0.33  |
| N-Methylpyrrolidine                   | -2.91 | -2.7   | -0.21 |
| N-Nitrosodibutylamine                 | -3.96 | -3.68  | -0.28 |
| N-Nitrosodiethylamine                 | -4.21 | -3.72  | -0.49 |
| N-Nitrosodiisopropylamine             | -3.47 | -3.06  | -0.41 |
| N-Nitrosodimethylamine                | -4.69 | -3.98  | -0.71 |
| N-Nitrosodipropylamine                | -4.22 | -3.7   | -0.52 |
| N-Nitrosomorpholine                   | -6.35 | -5.77  | -0.58 |
| N-Nitrosopiperidine                   | -5.06 | -4.55  | -0.51 |

|                                                    |        |       |       |
|----------------------------------------------------|--------|-------|-------|
| N-Nitrosopyrrolidine                               | -6.15  | -4.53 | -1.62 |
| n-Nonanal                                          | -1.52  | -2.05 | 0.53  |
| n-Octanoic acid                                    | -4.44  | -4.3  | -0.14 |
| n-Octylamine                                       | -2.68  | -3.21 | 0.53  |
| Nonane                                             | 2.24   | 1.28  | 0.96  |
| Nonylbenzene                                       | 0.56   | -0.33 | 0.89  |
| Nopinene                                           | 0.28   | -0.25 | 0.53  |
| Norflurazon                                        | -8.69  | -9.45 | 0.76  |
| n-Propyl acetate                                   | -2.05  | -2.06 | 0.01  |
| n-Propyl iodide                                    | -0.39  | -0.42 | 0.03  |
| n-Propylformate                                    | -1.81  | -1.86 | 0.05  |
| n-Propylnitrate                                    | -1.28  | -1.66 | 0.38  |
| Nuarimol                                           | -8.01  | -9.49 | 1.48  |
| n-Valeraldehyde                                    | -2.22  | -2.09 | -0.13 |
| O,O-Dimethyl-S-[2-(ethylthio)ethyl]dithiophosphate | -4.48  | -3.77 | -0.71 |
| o-Anthranilic acid                                 | -7.17  | -6.42 | -0.75 |
| o-Cresol                                           | -4.3   | -3.91 | -0.39 |
| Octabromodibenzo-p-dioxin                          | -5.1   | -5.43 | 0.33  |
| Octachlorodibenzofuran                             | -4.11  | -3.74 | -0.37 |
| Octachlorodibenzo-p-dioxin                         | -4.11  | -3.75 | -0.36 |
| Octachloronaphthalene                              | -3.48  | -3.05 | -0.43 |
| Octachlorostyrene                                  | -2.11  | -1.59 | -0.52 |
| Octamethylcyclotetrasiloxane                       | 2.69   | 2.23  | 0.46  |
| Octane                                             | 2.07   | 1.13  | 0.94  |
| Octanedioic acid                                   | -10.35 | -9.96 | -0.39 |
| Octylbenzene                                       | 0.3    | -0.39 | 0.69  |
| Octylcyanide                                       | -2     | -1.75 | -0.25 |
| Octylcyclohexane                                   | 2.02   | 1.38  | 0.64  |
| Ofurace                                            | -7.45  | -7.35 | -0.10 |
| Orbencarb                                          | -4.7   | -4.61 | -0.09 |
| Orysastrobins                                      | -8.86  | -10.7 | 1.84  |
| o-Toluidine                                        | -3.87  | -4.13 | 0.26  |
| Oxabetrinil                                        | -5.33  | -7.01 | 1.68  |
| Oxadixyl                                           | -9.7   | -8.62 | -1.08 |
| Oxalic acid                                        | -8.23  | -9.99 | 1.76  |
| Oxidimethiin                                       | -9.03  | -9.06 | 0.03  |
| Oxirane                                            | -2.31  | -2.01 | -0.30 |
| Oxyfluorfen                                        | -4.47  | -3.95 | -0.52 |
| Paclobutrazol                                      | -7.88  | -7.06 | -0.82 |
| p-Anthranilic acid                                 | -8.98  | -8.44 | -0.54 |
| Paraoxon                                           | -7.05  | -6.33 | -0.72 |
| p-Benzidine                                        | -9.29  | -8.21 | -1.08 |



|                             |        |       |       |
|-----------------------------|--------|-------|-------|
| PCNB                        | -3.82  | -2.99 | -0.83 |
| p-Cresol                    | -4.5   | -3.91 | -0.59 |
| p-Cresyl diphenyl phosphate | -5.39  | -5.89 | 0.50  |
| p-Cymene                    | -0.39  | -0.58 | 0.19  |
| Pebulate                    | -3.01  | -3.39 | 0.38  |
| Pefurazoate                 | -6.65  | -8.62 | 1.97  |
| Pelargonic acid             | -4.18  | -4.29 | 0.11  |
| Penconazole                 | -6.24  | -4.66 | -1.58 |
| Pencycuron                  | -9.25  | -8.42 | -0.83 |
| Penfenate                   | -4.03  | -3.41 | -0.62 |
| Penoxalin                   | -3.38  | -4.56 | 1.18  |
| Pentabromoanisole           | -3.44  | -3.1  | -0.34 |
| Pentachloroanisole          | -0.97  | -2.03 | 1.06  |
| Pentachlorobenzene          | -1.54  | -1.44 | -0.10 |
| Pentachloroethane           | -1     | -1    | 0.00  |
| Pentachlorophenol           | -3.81  | -4.19 | 0.38  |
| Pentachlorotoluene          | -1.39  | -1.53 | 0.14  |
| Pentadecane                 | 2.99   | 2.18  | 0.81  |
| Pentafluorobenzene          | -0.27  | -0.09 | -0.18 |
| Pentamethylbenzene          | -1.28  | -0.89 | -0.39 |
| Pentane                     | 1.75   | 0.68  | 1.07  |
| Pentanedioic acid           | -10.67 | -9.99 | -0.68 |
| Pentanenitrile              | -2.55  | -1.79 | -0.76 |
| Pentanoic acid              | -4.72  | -4.33 | -0.39 |
| Penthiopyrad                | -6.95  | -7.64 | 0.69  |
| Pentylcyclopentane          | 1.87   | 0.8   | 1.07  |
| Perchlordecone              | -1.48  | -2.74 | 1.26  |
| Perchlorobiphenyl           | -3.13  | -2.97 | -0.16 |
| Perchlorocyclopentadiene    | -0.17  | -0.37 | 0.20  |
| Perylene                    | -4.06  | -5.57 | 1.51  |
| Pethoxamid                  | -6.12  | -6.05 | -0.07 |
| Phenanthrene                | -2.76  | -3.19 | 0.43  |
| Phenanthridine              | -6.23  | -5.42 | -0.81 |
| Phenethyl alcohol           | -4.98  | -4.5  | -0.48 |
| Phenmedipham                | -10.11 | -9.86 | -0.25 |
| Phenol                      | -4.77  | -3.84 | -0.93 |
| Phenothrin                  | -5.54  | -4.62 | -0.92 |
| Phenylacetonitrile          | -3.44  | -2.92 | -0.52 |
| Phenylhydrazine             | -6.71  | -6.92 | 0.21  |
| Phenylmethanol              | -4.62  | -4.51 | -0.11 |
| Phlorol                     | -4.14  | -3.9  | -0.24 |
| Phosphamide                 | -8.11  | -7.91 | -0.20 |

|                                             |       |       |       |
|---------------------------------------------|-------|-------|-------|
| Phthalic anhydride                          | -6.16 | -5.22 | -0.94 |
| Phthalthrin                                 | -7.52 | -8.48 | 0.96  |
| Picoxystrobin                               | -6.53 | -5.22 | -1.31 |
| Pinacolone                                  | -2.03 | -1.5  | -0.53 |
| Pinoxaden                                   | -9.43 | -11   | 1.57  |
| Piperazine                                  | -5.43 | -5.59 | 0.16  |
| Piperidine                                  | -3.74 | -3.22 | -0.52 |
| Piperophos                                  | -6.34 | -7.04 | 0.70  |
| Pirimicarb                                  | -7.46 | -7.36 | -0.10 |
| Pirimiphos-ethyl                            | -4.52 | -4.78 | 0.26  |
| Pirimiphos-methyl                           | -4.91 | -5.02 | 0.11  |
| Plinol                                      | -3.08 | -3.61 | 0.53  |
| p-Menthane                                  | 1.86  | 1.06  | 0.80  |
| Preforan                                    | -6.13 | -4.91 | -1.22 |
| Prehnitene                                  | -0.86 | -0.87 | 0.01  |
| Pretilachlor                                | -5.96 | -6.12 | 0.16  |
| Prochloraz                                  | -6.17 | -7.74 | 1.57  |
| Procymidone                                 | -6.07 | -5.71 | -0.36 |
| Profluthrin                                 | -1.79 | -2.68 | 0.89  |
| Promecarb                                   | -5.44 | -5.75 | 0.31  |
| Prometon                                    | -6.92 | -5.98 | -0.94 |
| Prometryn                                   | -6.49 | -6.28 | -0.21 |
| Pronamide                                   | -6.4  | -6.52 | 0.12  |
| Propachlor                                  | -5.35 | -4.42 | -0.93 |
| Propafos                                    | -5.93 | -5.71 | -0.22 |
| Propamocarb                                 | -7.22 | -6.87 | -0.35 |
| Propanal                                    | -2.35 | -2.11 | -0.24 |
| Propane                                     | 1.43  | 0.38  | 1.05  |
| Propanenitrile                              | -2.93 | -1.81 | -1.12 |
| Propanil                                    | -7.53 | -5.67 | -1.86 |
| Propanoic acid                              | -4.74 | -4.35 | -0.39 |
| Propanone                                   | -2.77 | -1.99 | -0.78 |
| Propaquizafop                               | -9.9  | -8.52 | -1.38 |
| Propazine                                   | -6.27 | -5.95 | -0.32 |
| Propenal                                    | -2.79 | -2.12 | -0.67 |
| Propham                                     | -5.13 | -4.68 | -0.45 |
| Propiconazole                               | -7.29 | -5.97 | -1.32 |
| Propisochlor                                | -5.14 | -4.77 | -0.37 |
| Propoxur                                    | -6.99 | -5.93 | -1.06 |
| Propyl 2-hexyl-3-oxocyclopentanecarboxylate | -4.54 | -4.45 | -0.09 |
| Propyl 4-hydroxybenzoate                    | -6.63 | -5.92 | -0.71 |
| Propyl butyrate                             | -1.65 | -2.04 | 0.39  |

|                    |        |        |       |
|--------------------|--------|--------|-------|
| Propyl propanoate  | -1.86  | -2.06  | 0.20  |
| Propylcyclohexane  | 1.62   | 0.63   | 0.99  |
| Propylcyclopentane | 1.56   | 0.5    | 1.06  |
| Propylene          | 0.86   | 0.1    | 0.76  |
| Propyne            | -0.27  | -0.53  | 0.26  |
| Prosulfocarb       | -4.27  | -4.54  | 0.27  |
| Prothiofos         | -2.92  | -2.94  | 0.02  |
| Prothoate          | -7.36  | -7.29  | -0.07 |
| Pseudococaine      | -8.79  | -7.68  | -1.11 |
| p-Toluidine        | -4.04  | -4.13  | 0.09  |
| Pulegone           | -2.84  | -2.74  | -0.10 |
| Pyrasulfotole      | -10.65 | -9.53  | -1.12 |
| Pyrazon            | -12.17 | -10.2  | -1.97 |
| Pyrazoxyfen        | -5.14  | -6.78  | 1.64  |
| Pyrene             | -3.7   | -4.37  | 0.67  |
| Pyridalyl          | -3.9   | -4.16  | 0.26  |
| Pyridaphenthion    | -8.1   | -9.02  | 0.92  |
| Pyridine           | -3.44  | -3.11  | -0.33 |
| Pyrifenox          | -5.76  | -5.47  | -0.29 |
| Pyrimethanil       | -5.75  | -5.58  | -0.17 |
| Pyriminobac-methyl | -6.26  | -5.17  | -1.09 |
| Pyriminostrobin    | -7.31  | -8.44  | 1.13  |
| Pyroquilon         | -7.1   | -5.61  | -1.49 |
| Pyrrole            | -3.15  | -3.84  | 0.69  |
| Pyrrolidine        | -4.01  | -3.2   | -0.81 |
| Pyruvic acid       | -6.88  | -6.26  | -0.62 |
| Quinalphos         | -5.42  | -5.62  | 0.20  |
| Quinoclamine       | -7.52  | -8.51  | 0.99  |
| Quinoline          | -4.2   | -4.01  | -0.19 |
| Quinoxifen         | -4.21  | -5.2   | 0.99  |
| Quizalofop-Ethyl   | -6.12  | -7.63  | 1.51  |
| R134a              | 0.39   | 0.65   | -0.26 |
| Randox             | -4.88  | -4.93  | 0.05  |
| Resmethrin         | -4.86  | -4.27  | -0.59 |
| Ribitol            | -15.06 | -15.18 | 0.12  |
| Sabinene           | 0.42   | -0.15  | 0.57  |
| Salicylic acid     | -6.27  | -6.2   | -0.07 |
| s-Butylacetate     | -1.64  | -1.79  | 0.15  |
| s-Butylbenzene     | -0.27  | -0.5   | 0.23  |
| s-Butylnitrate     | -1.04  | -1.37  | 0.33  |
| Sebuthylazine      | -6.32  | -6.3   | -0.02 |
| Secbumeton         | -6.55  | -6.44  | -0.11 |

|                       |        |        |       |
|-----------------------|--------|--------|-------|
| Sethoxydim            | -6.95  | -7.05  | 0.10  |
| Siduron               | -8.56  | -8.17  | -0.39 |
| Simazine              | -6.86  | -6.61  | -0.25 |
| Simeton               | -7.8   | -6.76  | -1.04 |
| Simetryn              | -7.56  | -6.96  | -0.60 |
| Sorbic acid           | -6     | -4.75  | -1.25 |
| Sorbinaldehyde        | -3.4   | -2.52  | -0.88 |
| Sorbitol              | -18.21 | -17.99 | -0.22 |
| Sparticide            | -3.28  | -5.2   | 1.92  |
| Spiromesifen          | -4.94  | -5.92  | 0.98  |
| Spiroxamine           | -3.39  | -3.12  | -0.27 |
| Stirofos              | -6.77  | -6.14  | -0.63 |
| s-trans-1,3-Butadiene | 0.41   | 0.15   | 0.26  |
| Styrene               | -0.81  | -0.76  | -0.05 |
| Styrene oxide         | -3.03  | -2.83  | -0.20 |
| Sulfometuron-methyl   | -14.77 | -12.9  | -1.87 |
| Sulprofos             | -3.81  | -3.74  | -0.07 |
| t-Amyl acetate        | -1.31  | -1.82  | 0.51  |
| tau-Fluvalinate       | -7.32  | -8.69  | 1.37  |
| t-Butyl propionate    | -1.27  | -1.75  | 0.48  |
| t-Butylacetate        | -1.54  | -1.81  | 0.27  |
| t-Butylbenzene        | -0.29  | -0.17  | -0.12 |
| t-Butylformate        | -1.55  | -1.56  | 0.01  |
| TCBA                  | -6.06  | -5.68  | -0.38 |
| Tebuconazole          | -7.92  | -7.4   | -0.52 |
| Tebuthiuron           | -7.96  | -6.31  | -1.65 |
| Tedion                | -3.92  | -3.72  | -0.20 |
| Teflubenzuron         | -6.67  | -8.11  | 1.44  |
| Tembotrione           | -10.68 | -11.41 | 0.73  |
| Teproloxydim          | -8.11  | -8.42  | 0.31  |
| Terbacil              | -8.15  | -6.77  | -1.38 |
| Terbufos              | -3.47  | -3.79  | 0.32  |
| Terbumeton            | -6.43  | -5.99  | -0.44 |
| Terbuthylazine        | -6.03  | -5.85  | -0.18 |
| Terbutryne            | -6.3   | -6.16  | -0.14 |
| Terpinolene           | 0.03   | -0.5   | 0.53  |
| Tetrabromobisphenol A | -8.16  | -8.46  | 0.30  |
| Tetrachloroethylene   | -0.15  | -0.59  | 0.44  |
| Tetrachloroveratrole  | -2.35  | -2.55  | 0.20  |
| Tetradecane           | 2.56   | 2.03   | 0.53  |
| Tetradisul            | -3.16  | -2.91  | -0.25 |
| Tetrahydrofuran       | -2.54  | -2.05  | -0.49 |

|                                   |       |        |       |
|-----------------------------------|-------|--------|-------|
| Tetrahydropyran                   | -2.29 | -2.07  | -0.22 |
| Tetramethylene glycol             | -6.77 | -6.53  | -0.24 |
| Thenylchlor                       | -6.48 | -6.34  | -0.14 |
| Thimet                            | -3.75 | -3.86  | 0.11  |
| Thioanisole                       | -2    | -2.03  | 0.03  |
| Thiobencarb                       | -4.74 | -4.6   | -0.14 |
| Thiofanocarb                      | -6.42 | -6.87  | 0.45  |
| Thionazin                         | -4.9  | -5.18  | 0.28  |
| Thiophene                         | -1.01 | -0.57  | -0.44 |
| Thiophos                          | -4.47 | -4.12  | -0.35 |
| Thioxamyl                         | -10.8 | -10.59 | -0.21 |
| TNT                               | -6.15 | -5.81  | -0.34 |
| Tolclofos-methyl                  | -3.23 | -3.04  | -0.19 |
| Tonalide                          | -2.29 | -3.01  | 0.72  |
| t-Pentylbenzene                   | -0.13 | -0.05  | -0.08 |
| Tralkoxydim                       | -7.57 | -7.56  | -0.01 |
| trans-1,2-Cycloheptyl dinitrate   | -3.34 | -3.53  | 0.19  |
| trans-1,2-Cyclohexyl dinitrate    | -3.11 | -3.51  | 0.40  |
| trans-1,2-Dichloroethylene        | -0.66 | -0.59  | -0.07 |
| trans-1,2-Dimethylcyclohexane     | 1.39  | 0.62   | 0.77  |
| trans-1,3-Cyclohexyl dinitrate    | -3.23 | -3.51  | 0.28  |
| trans-1,3-Dichloropropene         | -1.14 | -1.14  | 0.00  |
| trans-1,3-Dimethylcyclohexane     | 1.52  | 0.62   | 0.90  |
| trans-1,4-Dichloro-2-butene       | -1.57 | -1.7   | 0.13  |
| trans-1,4-Dimethylcyclohexane     | 1.55  | 0.62   | 0.93  |
| trans-2,5-Dimethyltetrahydrofuran | -2.14 | -1.47  | -0.67 |
| trans-2-Butene                    | 0.96  | -0.05  | 1.01  |
| trans-2-Heptene                   | 1.25  | 0.16   | 1.09  |
| trans-2-Hexenal                   | -2.54 | -2.32  | -0.22 |
| trans-2-Hexene                    | 1.02  | 0.1    | 0.92  |
| trans-2-Methylcyclohexanol        | -3.51 | -3.78  | 0.27  |
| trans-2-Octene                    | 1.57  | 0.22   | 1.35  |
| trans-2-Pentene                   | 0.98  | 0.04   | 0.94  |
| trans-4-Methylcyclohexanol        | -3.8  | -3.78  | -0.02 |
| trans-Azobenzene                  | -3.26 | -4.46  | 1.20  |
| trans-Crotononitrile              | -2.34 | -2.03  | -0.31 |
| trans-Decalin                     | 0.68  | 0.14   | 0.54  |
| Transfluthrin                     | -2.73 | -2.77  | 0.04  |
| trans-Geraniol                    | -3.82 | -3.77  | -0.05 |
| trans-Nerolidol                   | -2.76 | -3.49  | 0.73  |
| trans-Stilbene                    | -2.72 | -1.77  | -0.95 |
| Tri(2-chlorethyl)amine            | -4.12 | -3.95  | -0.17 |

|                              |       |        |       |
|------------------------------|-------|--------|-------|
| Tri-2-butoxyethyl phosphate  | -7.92 | -7.86  | -0.06 |
| Triadimenol                  | -8.5  | -8.28  | -0.22 |
| Triallate                    | -3.31 | -2.84  | -0.47 |
| Triallylamine                | -1.97 | -1.77  | -0.20 |
| Triasulfuron                 | -12.3 | -10.32 | -1.98 |
| Triazamate                   | -8.33 | -9.58  | 1.25  |
| Triazothion                  | -6.36 | -6.31  | -0.05 |
| Tributyl phosphate           | -4.59 | -4.14  | -0.45 |
| Tributylamine                | -1.3  | -1.79  | 0.49  |
| Trichlopyr                   | -7.4  | -6.31  | -1.09 |
| Trichloroacetic acid         | -6.26 | -4.72  | -1.54 |
| Trichloroacetonitrile        | -0.23 | -2.18  | 1.95  |
| Trichloroethylene            | -0.44 | -0.59  | 0.15  |
| Trichlorosyringol            | -5.05 | -5.23  | 0.18  |
| Tricyclene                   | 0.92  | 0.56   | 0.36  |
| Tridecane                    | 2.07  | 1.88   | 0.19  |
| Tridecylamine                | -2.35 | -3.29  | 0.94  |
| Tridemorph                   | -2.16 | -3.22  | 1.06  |
| Tridiphane                   | -2.71 | -3.36  | 0.65  |
| Triethyl phosphate           | -5.53 | -4.2   | -1.33 |
| Triethylamine                | -2.21 | -1.77  | -0.44 |
| Trifloxystrobin              | -6.03 | -5.94  | -0.09 |
| Triflumizole                 | -5.77 | -5.72  | -0.05 |
| Trifluoroacetic acid         | -2.08 | -3.79  | 1.71  |
| Trimethyl phosphate          | -6.33 | -4.59  | -1.74 |
| Trimethylacetic acid         | -3.94 | -3.87  | -0.07 |
| Trimethylamine               | -2.35 | -2.16  | -0.19 |
| Trimethyleneglycol dinitrate | -3.51 | -3.26  | -0.25 |
| Trimethylethylene            | 0.98  | 0.06   | 0.92  |
| Trinexapac-ethyl             | -6.66 | -7.82  | 1.16  |
| Triphenyl phosphate          | -4.61 | -5.82  | 1.21  |
| Tripropyl phosphate          | -4.47 | -4.17  | -0.30 |
| Tripropylamine               | -1.81 | -1.74  | -0.07 |
| Triptane                     | 2.1   | 1.6    | 0.50  |
| Tritac                       | -4.7  | -5.66  | 0.96  |
| Tycor                        | -6.45 | -7.12  | 0.67  |
| Undecane                     | 2.53  | 1.58   | 0.95  |
| Valencene                    | 0.1   | -0.06  | 0.16  |
| Valifenalate                 | -8.86 | -10.53 | 1.67  |
| Veratrole                    | -3.29 | -2.27  | -1.02 |
| Vernolate                    | -2.97 | -3.39  | 0.42  |
| Vinclozolin                  | -5.75 | -5.08  | -0.67 |

|                    |       |       |       |
|--------------------|-------|-------|-------|
| Vinyl acetate      | -1.69 | -1.56 | -0.13 |
| Vinylacetylene     | 0     | -0.43 | 0.43  |
| Vinylidenechloride | 0.04  | -0.22 | 0.26  |
| Vitavax            | -7.89 | -7.62 | -0.27 |
| Xylitol            | -9.21 | -9.18 | -0.03 |
| Z-Caryophyllene    | 0.04  | -0.06 | 0.10  |
| Zoocoumarin        | -8    | -9.24 | 1.24  |
