# Supplementary material
Source: MDPI journal article supplement (https://www.mdpi.com/2673-8015/4/1/11)
Supplement: s1 [file s1]

| Molecule name                                                             | logP exp | logP calc | Diff  |
|---------------------------------------------------------------------------|----------|-----------|-------|
| (2-Bromoethyl)benzene                                                     | 3.09     | 3.15      | -0.06 |
| (2-Pyridyl)acetamide                                                      | -0.65    | 0.2       | -0.85 |
| (3-Bromopropyl)benzene                                                    | 3.72     | 3.59      | 0.13  |
| (3-Chloropropyl)benzene                                                   | 3.55     | 3.51      | 0.04  |
| (9Z)-Octadecenoic acid                                                    | 7.64     | 6.79      | 0.85  |
| (Bromomethyl)benzene                                                      | 2.92     | 2.71      | 0.21  |
| (Chloromethyl)benzene                                                     | 2.3      | 2.63      | -0.33 |
| (E) 4-Decenal                                                             | 4.05     | 3.39      | 0.66  |
| (Ethylthio)benzene                                                        | 3.2      | 2.98      | 0.22  |
| (L)-Alanine                                                               | -2.83    | -2.92     | 0.09  |
| (L)-Cysteine                                                              | -2.49    | -2.87     | 0.38  |
| (L)-Histidine                                                             | -2.52    | -3.32     | 0.80  |
| (L)-Methionine                                                            | -1.87    | -2.03     | 0.16  |
| (S)-(+)-Nirvanol                                                          | 1.53     | 1.56      | -0.03 |
| (Trichloromethyl)benzene                                                  | 2.92     | 3.9       | -0.98 |
| (Z) 7-Decenal                                                             | 3.52     | 3.39      | 0.13  |
| 1 1-Bis(methylthio)-2-nitroethylene                                       | 1.69     | 1.68      | 0.01  |
| 1-(2,4,5-Trichlorophenylhydrazono)-1-cyanoacetic acid ethylester          | 5.21     | 5.06      | 0.15  |
| 1-(2,4,5-Trichlorophenylhydrazono)-1-cyanoacetic acid methylester         | 5.15     | 4.63      | 0.52  |
| 1-(2,4-Dinitrophenylhydrazono)-1-cyanoacetic acid ethylester              | 4.14     | 3.72      | 0.42  |
| 1-(2,4-Dinitrophenylhydrazono)-1-cyanoacetone                             | 3.41     | 3.22      | 0.19  |
| 1-(2,6-Cl2-4-CF3-phenylhydrazono)-1-cyanoacetic acid methylester          | 4.36     | 5.03      | -0.67 |
| 1-(2-CF3-phenylhydrazono)-1-cyanoacetic acid methylester                  | 3.72     | 3.97      | -0.25 |
| 1-(2-Chlorophenylhydrazono)-1-cyanoacetone                                | 4.01     | 3.5       | 0.51  |
| 1-(2-Cl-5-CF3-phenylhydrazono)-1-cyanoacetic acid methylester             | 4.42     | 4.5       | -0.08 |
| 1-(2-Cl-5-CF3-phenylhydrazono)-1-cyanoacetone                             | 5.08     | 4.43      | 0.65  |
| 1-(2-Hydroxyphenyl)-1-propanone                                           | 2.54     | 2.26      | 0.28  |
| 1-(2-Methylsulfonyl-4-nitrophenylhydrazono)-1-cyanoacetic acid ethylester | 3.21     | 2.84      | 0.37  |
| 1-(2-NO2-5-CF3-phenylhydrazono)-1-cyanoacetic acid methylester            | 3.44     | 4.35      | -0.91 |
| 1-(2-Pyridinyl)ethanone                                                   | 0.83     | 0.4       | 0.43  |
| 1-(3,4,5-Trichlorophenylhydrazono)-1-cyanoacetic acid ethylester          | 5.03     | 5.06      | -0.03 |
| 1-(3,4,5-Trichlorophenylhydrazono)-1-cyanoacetic acid methylester         | 5.22     | 4.63      | 0.59  |
| 1-(3,4-Dichlorophenylhydrazono)-1-cyanoacetic acid ethylester             | 4.66     | 4.53      | 0.13  |
| 1-(3,4-Dichlorophenylhydrazono)-1-cyanoacetone                            | 4.56     | 4.03      | 0.53  |
| 1-(3,5-Dichlorophenylhydrazono)-1-cyanoacetic acid ethylester             | 3.82     | 4.53      | -0.71 |
| 1-(3,5-Dichlorophenylhydrazono)-1-cyanoacetic acid methylester            | 4.5      | 4.1       | 0.40  |
| 1-(3,5-Dichlorophenylhydrazono)-1-cyanoacetone                            | 4.68     | 4.03      | 0.65  |
| 1-(3-CF3-phenylhydrazono)-1-cyanoacetic acid methylester                  | 3.78     | 3.97      | -0.19 |
| 1-(3-Chlorophenylhydrazono)-1-cyanoacetic acid methylester                | 3.56     | 3.57      | -0.01 |
| 1-(3-Chlorophenylhydrazono)-1-cyanoacetone                                | 3.91     | 3.5       | 0.41  |

|                                                                                       |      |      |       |
|---------------------------------------------------------------------------------------|------|------|-------|
| 1-(3-Cl-phenylhydrazono)-1-cyanoacetic acid ethylester                                | 3.94 | 4    | -0.06 |
| 1-(4-Carboxybutyl)benzotriazole                                                       | 0.93 | 1.96 | -1.03 |
| 1-(4-CF <sub>3</sub> SO <sub>2</sub> -phenylhydrazono)-1-cyanoacetic acid methylester | 4.22 | 3.41 | 0.81  |
| 1-(4-CF <sub>3</sub> S-phenylhydrazono)-1-cyanoacetic acid methylester                | 4.27 | 4.89 | -0.62 |
| 1-(4-Chlorophenylhydrazono)-1-cyanoacetone                                            | 4.13 | 3.5  | 0.63  |
| 1-(4-Cl-2-CF <sub>3</sub> -phenylhydrazono)-1-cyanoacetic acid methylester            | 4.66 | 4.5  | 0.16  |
| 1-(4-Cl-2-CH <sub>3</sub> -phenylhydrazono)-1-cyanoacetic acid methylester            | 4.28 | 3.91 | 0.37  |
| 1-(4-trifluoromethylthiophenylhydrazono)-1-cyanoacetone                               | 5.04 | 4.82 | 0.22  |
| 1-(Chloromethyl)-2-fluorobenzene                                                      | 2.67 | 2.65 | 0.02  |
| 1,1,1,2-Tetrachloroethane                                                             | 2.62 | 2.66 | -0.04 |
| 1,1,1,3,3,3-Hexafluoro-2-methoxypropane                                               | 2.91 | 2.35 | 0.56  |
| 1,1,1,3,3,3-Hexafluoro-2-phenyl-2-propanol                                            | 3.41 | 3.1  | 0.31  |
| 1,1,1-Trifluoro-2-propanol                                                            | 0.71 | 1    | -0.29 |
| 1,1,2,2-Tetrachloroethane                                                             | 2.39 | 2.59 | -0.20 |
| 1,1,2-Trichloroethane                                                                 | 1.89 | 1.99 | -0.10 |
| 1,10-Decyl dinitrate                                                                  | 5.56 | 4.95 | 0.61  |
| 1,13-Tridecanedioic acid                                                              | 3.99 | 3.72 | 0.27  |
| 1,1-Bis(methylthio)ethylene                                                           | 2.04 | 2.26 | -0.22 |
| 1,1-Dichloroacetone                                                                   | 0.97 | 1.07 | -0.10 |
| 1,1-Dichloroethane                                                                    | 1.79 | 1.93 | -0.14 |
| 1,1-Dicyano-2,2-bis(methylthio)ethylene                                               | 1.16 | 0.99 | 0.17  |
| 1,1-Diethoxyethane                                                                    | 0.84 | 1.44 | -0.60 |
| 1,1-Dimethyl-3-phenylurea                                                             | 0.98 | 1.52 | -0.54 |
| 1,1-Dimethylpropargylamine                                                            | 0.64 | 0.34 | 0.30  |
| 1,2,3,4,5,6,8-Heptachloronaphthalene                                                  | 7.46 | 6.94 | 0.52  |
| 1,2,3,4,5,7-Hexachloronaphthalene                                                     | 7.58 | 6.41 | 1.17  |
| 1,2,3,4,6,7,8-Heptachlorodibenzofuran                                                 | 7.92 | 7.71 | 0.21  |
| 1,2,3,4,6,7-Hexachloronaphthalene                                                     | 6.77 | 6.41 | 0.36  |
| 1,2,3,4,6-Pentachloronaphthalene                                                      | 7    | 5.88 | 1.12  |
| 1,2,3,4,7-Pentachlorodibenzofuran                                                     | 6.53 | 6.65 | -0.12 |
| 1,2,3,4,7-Pentachlorodibenzo-p-dioxin                                                 | 6.6  | 6.64 | -0.04 |
| 1,2,3,4-Tetrachlorobenzene                                                            | 4.64 | 4.35 | 0.29  |
| 1,2,3,4-Tetrachlorodibenzofuran                                                       | 6.17 | 6.12 | 0.05  |
| 1,2,3,4-Tetrachlorodibenzo-p-dioxin                                                   | 7.18 | 6.11 | 1.07  |
| 1,2,3,4-Tetrachloronaphthalene                                                        | 5.9  | 5.35 | 0.55  |
| 1,2,3,4-Tetrahydronaphthalene                                                         | 3.49 | 3.91 | -0.42 |
| 1,2,3,4-Tetrahydroquinoline                                                           | 2.29 | 2.39 | -0.10 |
| 1,2,3,5,7,8-Hexachloronaphthalene                                                     | 7.33 | 6.41 | 0.92  |
| 1,2,3,5,7-Pentachloronaphthalene                                                      | 6.87 | 5.88 | 0.99  |
| 1,2,3,5,8-Pentachloronaphthalene                                                      | 6.46 | 5.88 | 0.58  |
| 1,2,3,5-Tetrachlorobenzene                                                            | 4.66 | 4.35 | 0.31  |
| 1,2,3,5-Tetrachloronaphthalene                                                        | 5.78 | 5.35 | 0.43  |

|                                                   |       |       |       |
|---------------------------------------------------|-------|-------|-------|
| 1,2,3,5-Tetramethylbenzene                        | 4.04  | 3.79  | 0.25  |
| 1,2,3,7,8-Pentachlorodibenzofuran                 | 6.79  | 6.65  | 0.14  |
| 1,2,3,7,8-Pentachlorodibenzo-p-dioxin             | 6.64  | 6.64  | 0.00  |
| 1,2,3,7-Tetrachlorodibenzofuran                   | 6.04  | 6.12  | -0.08 |
| 1,2,3-Propanetricarboxylic acid                   | -1.72 | -1.65 | -0.07 |
| 1,2,3-Propanetriol                                | -1.79 | -1.73 | -0.06 |
| 1,2,3-Tribromobenzene                             | 4.98  | 4.18  | 0.80  |
| 1,2,3-Trichlorobenzene                            | 4.14  | 3.82  | 0.32  |
| 1,2,3-Trichloropropane                            | 1.98  | 2.08  | -0.10 |
| 1,2,3-Triiodobenzene                              | 5.86  | 5.26  | 0.60  |
| 1,2,3-Trimethoxybenzene                           | 1.53  | 2.02  | -0.49 |
| 1,2,4,5-Tetrabromobenzene                         | 5.13  | 4.83  | 0.30  |
| 1,2,4,5-Tetrachlorobenzene                        | 4.63  | 4.35  | 0.28  |
| 1,2,4,5-Tetrafluorobenzene                        | 2.44  | 2.31  | 0.13  |
| 1,2,4,5-Tetramethylbenzene                        | 4     | 3.79  | 0.21  |
| 1,2,4,6,7,9-Hexachlorodibenzo-p-dioxin            | 7.85  | 7.17  | 0.68  |
| 1,2,4,7,8-Pentachlorodibenzofuran                 | 6.26  | 6.65  | -0.39 |
| 1,2,4,7,8-Pentachlorodibenzo-p-dioxin             | 6.64  | 6.64  | 0.00  |
| 1,2,4-Tribromobenzene                             | 4.32  | 4.18  | 0.14  |
| 1,2,4-Trichlorobenzene                            | 4.02  | 3.82  | 0.20  |
| 1,2,4-Trichlorodibenzo-p-dioxin                   | 6.34  | 5.58  | 0.76  |
| 1,2,4-Trifluorobenzene                            | 2.41  | 2.29  | 0.12  |
| 1,2,4-Triiodobenzene                              | 5.85  | 5.26  | 0.59  |
| 1,2,4-Trimethylbenzene                            | 3.7   | 3.43  | 0.27  |
| 1,2,7,8-Tetrachlorodibenzofuran                   | 6.23  | 6.12  | 0.11  |
| 1,2,7,8-Tetrachlorodibenzo-p-dioxin               | 6.38  | 6.11  | 0.27  |
| 1,2-Benzenedicarboxylic acid, di-2-propenyl ester | 3.23  | 2.63  | 0.60  |
| 1,2-Bis(dimethylamino)ethane                      | 0.3   | 0.07  | 0.23  |
| 1,2-Diaminobenzene                                | 0.15  | 0.41  | -0.26 |
| 1,2-Dibromobenzene                                | 3.64  | 3.53  | 0.11  |
| 1,2-Dibromoethane                                 | 1.96  | 1.55  | 0.41  |
| 1,2-Dibromohexane                                 | 3.85  | 3.54  | 0.31  |
| 1,2-Dichlorobenzene                               | 3.38  | 3.29  | 0.09  |
| 1,2-Dichloronaphthalene                           | 4.66  | 4.29  | 0.37  |
| 1,2-Difluorobenzene                               | 2.37  | 2.27  | 0.10  |
| 1,2-Dihydroxybenzene                              | 0.88  | 1.43  | -0.55 |
| 1,2-Dimethyl-3-nitrobenzene                       | 2.83  | 2.78  | 0.05  |
| 1,2-Dimethyl-4-nitrobenzene                       | 2.91  | 2.78  | 0.13  |
| 1,2-Dimethylbenzene                               | 3.12  | 3.07  | 0.05  |
| 1,2-Dimethylindole                                | 2.82  | 3.13  | -0.31 |
| 1,2-Dimethylnaphthalene                           | 4.31  | 4.15  | 0.16  |
| 1,2-Dimethylpropylamine                           | 1.1   | 1     | 0.10  |

|                                      |       |       |       |
|--------------------------------------|-------|-------|-------|
| 1,2-Dinitrobenzene                   | 1.69  | 1.97  | -0.28 |
| 1,2-Diphenylethane                   | 4.79  | 5.03  | -0.24 |
| 1,2-Diphenylhydrazine                | 2.94  | 3.03  | -0.09 |
| 1,2-Ethanediol                       | -1.36 | -1.13 | -0.23 |
| 1,2-Ethanediol dinitrate             | 1.37  | 1.43  | -0.06 |
| 1,3,5,7-Tetrachloronaphthalene       | 6.19  | 5.35  | 0.84  |
| 1,3,5,8-Tetrachloronaphthalene       | 5.81  | 5.35  | 0.46  |
| 1,3,5-Cycloheptatriene               | 2.63  | 2.75  | -0.12 |
| 1,3,5-Tribromobenzene                | 4.51  | 4.18  | 0.33  |
| 1,3,5-Trichlorobenzene               | 4.19  | 3.82  | 0.37  |
| 1,3,5-Trihydroxybenzene              | 0.16  | 1.03  | -0.87 |
| 1,3,5-Triiodobenzene                 | 5.85  | 5.26  | 0.59  |
| 1,3,5-Trimethylbenzene               | 3.42  | 3.43  | -0.01 |
| 1,3,5-Trinitrobenzene                | 1.18  | 1.84  | -0.66 |
| 1,3,6,8-Tetrachlorodibenzofuran      | 6.37  | 6.12  | 0.25  |
| 1,3,6,8-Tetrachlorodibenzo-p-dioxin  | 6.29  | 6.11  | 0.18  |
| 1,3,7,8-Tetrachlorodibenzofuran      | 6.39  | 6.12  | 0.27  |
| 1,3,7,9-Tetrachlorodibenzofuran      | 6.39  | 6.12  | 0.27  |
| 1,3,7,9-Tetrachlorodibenzo-p-dioxin  | 6.39  | 6.11  | 0.28  |
| 1,3,7-Trichlorodibenzo-p-dioxin      | 6.31  | 5.58  | 0.73  |
| 1,3,7-Trichloronaphthalene           | 5.35  | 4.82  | 0.53  |
| 1,3-Benzodioxole                     | 2.08  | 2.16  | -0.08 |
| 1,3-Bis(trifluoromethyl)benzene      | 3.83  | 4.09  | -0.26 |
| 1,3-Butyl dinitrate                  | 2.15  | 2.34  | -0.19 |
| 1,3-Cyclohexadiene                   | 2.47  | 2.55  | -0.08 |
| 1,3-Cyclohexanedione                 | -0.45 | 0.49  | -0.94 |
| 1,3-Diamino-2-propanol               | -2.05 | -2.43 | 0.38  |
| 1,3-Dibromobenzene                   | 3.75  | 3.53  | 0.22  |
| 1,3-Dichloro-2-propanol              | 0.2   | 0.53  | -0.33 |
| 1,3-Dichloro-4-fluorobenzene         | 2.91  | 3.31  | -0.40 |
| 1,3-Dichloroacetone                  | 0.02  | 0.53  | -0.51 |
| 1,3-Dichlorobenzene                  | 3.53  | 3.29  | 0.24  |
| 1,3-Dichloropropane                  | 2     | 1.83  | 0.17  |
| 1,3-Difluorobenzene                  | 2.21  | 2.27  | -0.06 |
| 1,3-Dihydroxybenzene                 | 0.8   | 1.43  | -0.63 |
| 1,3-Dimethoxybenzene                 | 2.21  | 2.09  | 0.12  |
| 1,3-Dimethylbenzene                  | 3.2   | 3.07  | 0.13  |
| 1,3-Dimethylimidazolium chloride     | 1.9   | 2.16  | -0.26 |
| 1,3-Dimethylimidazolium methosulfate | -0.41 | -0.47 | 0.06  |
| 1,3-Dimethylnaphthalene              | 4.42  | 4.15  | 0.27  |
| 1,3-Dimethyluracil                   | 0     | -0.89 | 0.89  |
| 1,3-Dinitrobenzene                   | 1.49  | 1.97  | -0.48 |

|                                              |       |       |       |
|----------------------------------------------|-------|-------|-------|
| 1,3-Dithiolane                               | 1.58  | 1.29  | 0.29  |
| 1,3-Propanediamine                           | -1.43 | -1.13 | -0.30 |
| 1,4,5-Trimethylnaphthalene                   | 4.9   | 4.51  | 0.39  |
| 1,4-Benzoquinone                             | 0.2   | -0.03 | 0.23  |
| 1,4-Butyl dinitrate                          | 2.17  | 2.31  | -0.14 |
| 1,4-Cyclohexadiene                           | 2.3   | 2.69  | -0.39 |
| 1,4-Cyclohexanedione                         | -0.52 | 0.49  | -1.01 |
| 1,4-Diaminobenzene                           | -0.3  | 0.41  | -0.71 |
| 1,4-Dibromo-2,3-butanedione                  | -0.86 | -0.17 | -0.69 |
| 1,4-Dibromo-2-butene                         | 2.03  | 2.03  | 0.00  |
| 1,4-Dibromobenzene                           | 3.79  | 3.53  | 0.26  |
| 1,4-Dichlorobenzene                          | 3.44  | 3.29  | 0.15  |
| 1,4-Dichlorobutane                           | 2.81  | 2.27  | 0.54  |
| 1,4-Dichloronaphthalene                      | 4.66  | 4.29  | 0.37  |
| 1,4-Difluorobenzene                          | 2.13  | 2.27  | -0.14 |
| 1,4-Dihydroxybenzene                         | 0.59  | 1.43  | -0.84 |
| 1,4-Diiodobenzene                            | 4.11  | 4.25  | -0.14 |
| 1,4-Dimethoxy-2,3,5,6-tetrachlorocyclohexane | 3.15  | 2.45  | 0.70  |
| 1,4-Dimethylbenzene                          | 3.15  | 3.07  | 0.08  |
| 1,4-Dimethylnaphthalene                      | 4.37  | 4.15  | 0.22  |
| 1,4-Dimethylquinoxalin-2,3-dione             | 0.08  | -0.03 | 0.11  |
| 1,4-Dinitrobenzene                           | 1.49  | 1.97  | -0.48 |
| 1,4-Dioxane                                  | -0.27 | -0.39 | 0.12  |
| 1,4-Dioxatetralin                            | 2.01  | 1.99  | 0.02  |
| 1,4-Di-t-butylbenzene                        | 5.63  | 5.35  | 0.28  |
| 1,4-Naphthoquinone                           | 1.78  | 1.13  | 0.65  |
| 1,4-Pentadiene                               | 2.48  | 2.25  | 0.23  |
| 1,4-Pentyl dinitrate                         | 2.88  | 2.78  | 0.10  |
| 1,5-Cyclooctadiene                           | 3.55  | 3.33  | 0.22  |
| 1,5-Dichloropentane                          | 3.3   | 2.71  | 0.59  |
| 1,5-Dimethylnaphthalene                      | 4.38  | 4.15  | 0.23  |
| 1,5-Hexadiene                                | 2.45  | 2.71  | -0.26 |
| 1,5-Hexyl dinitrate                          | 3.25  | 3.22  | 0.03  |
| 1,5-Pentanediol                              | 0.3   | 0.19  | 0.11  |
| 1,5-Pentyl dinitrate                         | 2.64  | 2.75  | -0.11 |
| 1,6-Dibromohexane                            | 3.57  | 3.31  | 0.26  |
| 1,6-Hexanedioic acid                         | 0.08  | 0.64  | -0.56 |
| 1,6-Hexanedithiol                            | 2.71  | 3.13  | -0.42 |
| 1,6-Hexyl dinitrate                          | 3.19  | 3.19  | 0.00  |
| 1,7-Dimethylnaphthalene                      | 4.44  | 4.15  | 0.29  |
| 1,7-Heptyl dinitrate                         | 3.81  | 3.63  | 0.18  |
| 1,7-Phenanthroline                           | 2.51  | 2.33  | 0.18  |

|                                                |       |       |       |
|------------------------------------------------|-------|-------|-------|
| 1,8-Dichloronaphthalene                        | 4.19  | 4.29  | -0.10 |
| 1,8-Dimethylnaphthalene                        | 4.26  | 4.15  | 0.11  |
| 1,8-Octanedithiol                              | 3.77  | 4.01  | -0.24 |
| 1,8-Octyl dinitrate                            | 4.4   | 4.07  | 0.33  |
| 11-Deoxycorticosterone                         | 2.88  | 3.41  | -0.53 |
| 17a-Hydroxyprogesterone                        | 3.17  | 3.37  | -0.20 |
| 17a-Methyltestosterone                         | 3.36  | 4.23  | -0.87 |
| 1-Acetoxy-2,3,4,5,6-pentachlorocyclohexane     | 3.4   | 3.45  | -0.05 |
| 1-Adamantanol                                  | 2.14  | 2.12  | 0.02  |
| 1-Amino-3-methoxypropane                       | -1.02 | -0.28 | -0.74 |
| 1-Aminoacridine                                | 2.47  | 2.77  | -0.30 |
| 1-Aminoadamantane                              | 2.44  | 2.18  | 0.26  |
| 1-Azabicyclo[2.2.2]octane                      | 1.2   | 1.47  | -0.27 |
| 1-Benzyl-3-methylimidazolium chloride          | 2.99  | 4.01  | -1.02 |
| 1-Benzyl-3-methylimidazolium tetrafluoroborate | 4.8   | 5.62  | -0.82 |
| 1-Benzylbenzimidazole                          | 3.24  | 3     | 0.24  |
| 1-Benzylimidazole                              | 1.6   | 1.06  | 0.54  |
| 1-Bromo-2-propanol                             | 0.28  | 0.55  | -0.27 |
| 1-Bromo-3-chloropropane                        | 2.18  | 1.91  | 0.27  |
| 1-Bromobutane                                  | 2.75  | 2.29  | 0.46  |
| 1-Bromooctane                                  | 4.89  | 4.05  | 0.84  |
| 1-Bromopentane                                 | 3.37  | 2.73  | 0.64  |
| 1-Bromopinacolone                              | 1.28  | 1.63  | -0.35 |
| 1-Bromopropane                                 | 2.1   | 1.85  | 0.25  |
| 1-Butanethiol                                  | 2.28  | 2.2   | 0.08  |
| 1-Butanol                                      | 0.79  | 0.82  | -0.03 |
| 1-Butene                                       | 1.59  | 2.01  | -0.42 |
| 1-Butyl-3-methylimidazolium bromide            | 3.59  | 3.59  | 0.00  |
| 1-Butyl-3-methylimidazolium chloride           | 3.25  | 3.59  | -0.34 |
| 1-Butyl-3-methylimidazolium iodide             | 3.79  | 3.59  | 0.20  |
| 1-Butyl-3-methylimidazolium methosulfate       | 0.94  | 0.96  | -0.02 |
| 1-Butyl-3-methylimidazolium tetrafluoroborate  | 5.06  | 5.2   | -0.14 |
| 1-Butyl-3-methylpyridinium tetrafluoroborate   | 4.77  | 4.78  | -0.01 |
| 1-Butyl-4-methylpyridinium tetrafluoroborate   | 4.98  | 4.78  | 0.20  |
| 1-Butylamine                                   | 0.97  | 0.73  | 0.24  |
| 1-Butylpyridinium chloride                     | 2.78  | 2.83  | -0.05 |
| 1-Butylpyridinium tetrafluoroborate            | 4.59  | 4.44  | 0.15  |
| 1-Butyne                                       | 1.44  | 1.45  | -0.01 |
| 1-Chloro-2-propanol                            | 0.14  | 0.47  | -0.33 |
| 1-Chlorobutane                                 | 2.55  | 2.21  | 0.34  |
| 1-Chlorodibenzo-p-dioxin                       | 5.05  | 4.52  | 0.53  |
| 1-Chloroheptane                                | 4.15  | 3.53  | 0.62  |

|                                               |       |       |       |
|-----------------------------------------------|-------|-------|-------|
| 1-Chloronaphthalene                           | 4.24  | 3.76  | 0.48  |
| 1-Chloropentane                               | 2.73  | 2.65  | 0.08  |
| 1-Chloropropane                               | 2.04  | 1.77  | 0.27  |
| 1-Decyl-3-methylimidazolium bromide           | 7     | 6.23  | 0.77  |
| 1-Decyl-3-methylimidazolium tetrafluoroborate | 8.48  | 7.84  | 0.64  |
| 1-Dimethylamino-2-propyne                     | -0.01 | 0.33  | -0.34 |
| 1-Dodecyl-3-methylimidazolium bromide         | 7     | 7.11  | -0.11 |
| 1-Ethoxy-butane                               | 2.03  | 2.01  | 0.02  |
| 1-Ethyl-1-hydroxyurea                         | -0.1  | -0.02 | -0.08 |
| 1-Ethyl-3-methylimidazolium bromide           | 2.66  | 2.71  | -0.05 |
| 1-Ethyl-3-methylimidazolium chloride          | 2.33  | 2.71  | -0.38 |
| 1-Ethyl-3-methylimidazolium ethosulfate       | 0.44  | 0.51  | -0.07 |
| 1-Ethyl-3-methylimidazolium tetrafluoroborate | 4.14  | 4.32  | -0.18 |
| 1-Ethyl-naphthalene                           | 4.39  | 4.25  | 0.14  |
| 1-Fluoropentane                               | 2.33  | 2.03  | 0.30  |
| 1-Heptanethiol                                | 3.82  | 3.52  | 0.30  |
| 1-Heptanol                                    | 2.57  | 2.14  | 0.43  |
| 1-Heptene                                     | 3.99  | 3.39  | 0.60  |
| 1-Heptyn-3-ol                                 | 1.73  | 1.39  | 0.34  |
| 1-Hexanol                                     | 2.03  | 1.7   | 0.33  |
| 1-Hexen-3-ol                                  | 1.18  | 1.51  | -0.33 |
| 1-Hexen-5-one                                 | 1.02  | 1.51  | -0.49 |
| 1-Hexene                                      | 3.39  | 2.93  | 0.46  |
| 1-Hexyl-3-methylimidazolium bromide           | 4.73  | 4.47  | 0.26  |
| 1-Hexyl-3-methylimidazolium chloride          | 4.39  | 4.47  | -0.08 |
| 1-Hexyl-3-methylimidazolium iodide            | 4.93  | 4.47  | 0.46  |
| 1-Hexyl-3-methylimidazolium tetrafluoroborate | 6.2   | 6.08  | 0.12  |
| 1-Hexyn-3-ol                                  | 1.2   | 0.95  | 0.25  |
| 1-Hexyne                                      | 2.73  | 2.37  | 0.36  |
| 1H-Indazole                                   | 1.82  | 2.6   | -0.78 |
| 1H-Indene-1,3(2H)-dione                       | 0.61  | 1.09  | -0.48 |
| 1H-Purine                                     | -0.37 | -0.28 | -0.09 |
| 1H-Pyrazole                                   | 0.13  | 1.05  | -0.92 |
| 1-Hydroxy-2,3,4,5,6-pentachlorocyclohexane    | 2.54  | 2.48  | 0.06  |
| 1-Iodobutane                                  | 3.06  | 2.96  | 0.10  |
| 1-Iodoheptane                                 | 4.7   | 4.28  | 0.42  |
| 1-Iodopentane                                 | 3.56  | 3.4   | 0.16  |
| 1-Isopropylbenzotriazole                      | 1.98  | 2.19  | -0.21 |
| 1-Methoxy-2-propanamine                       | -0.36 | -0.29 | -0.07 |
| 1-Methoxy-3-phenylpropane                     | 2.7   | 2.88  | -0.18 |
| 1-Methyl-1-hydroxypentachlorocyclohexane      | 2.94  | 2.69  | 0.25  |
| 1-Methyl-1-hydroxyurea                        | -0.46 | -0.57 | 0.11  |

|                                                  |      |       |       |
|--------------------------------------------------|------|-------|-------|
| 1-Methyl-4-isopropylcyclohexene                  | 4.57 | 4.16  | 0.41  |
| 1-Methyl-4-phenylquinazolin-2-one                | 1.79 | 2.53  | -0.74 |
| 1-Methylbenzotriazole                            | 1.13 | 1.21  | -0.08 |
| 1-Methylfluorene                                 | 4.97 | 5.07  | -0.10 |
| 1-Methylisatin                                   | 0.58 | 0.31  | 0.27  |
| 1-Methylnaphthalene                              | 3.87 | 3.79  | 0.08  |
| 1-Methylphenanthrene                             | 5.08 | 4.87  | 0.21  |
| 1-Methyluracil                                   | -1.2 | -0.78 | -0.42 |
| 1-Naphthalenecarboxylic acid                     | 3.1  | 2.45  | 0.65  |
| 1-Naphthol                                       | 2.84 | 2.83  | 0.01  |
| 1-Naphthyl acetate                               | 2.78 | 3.18  | -0.40 |
| 1-Naphthylamine                                  | 2.25 | 2.32  | -0.07 |
| 1-Naphthylisothiocyanate                         | 4.34 | 4.18  | 0.16  |
| 1-Naphthylmethylisothiocyanate                   | 4.42 | 4.53  | -0.11 |
| 1-Nitrobutane                                    | 1.47 | 1.29  | 0.18  |
| 1-Nitronaphthalene                               | 3.19 | 3.1   | 0.09  |
| 1-Nitropentane                                   | 2.01 | 1.73  | 0.28  |
| 1-Nitropropane                                   | 0.65 | 0.85  | -0.20 |
| 1-Nonanol                                        | 3.77 | 3.02  | 0.75  |
| 1-Nonene                                         | 5.15 | 4.31  | 0.84  |
| 1-Octanol                                        | 3    | 2.58  | 0.42  |
| 1-Octyl-3-methylimidazolium bromide              | 5.87 | 5.35  | 0.52  |
| 1-Octyl-3-methylimidazolium chloride             | 5.53 | 5.35  | 0.18  |
| 1-Octyl-3-methylimidazolium tetrafluoroborate    | 7.34 | 6.96  | 0.38  |
| 1-Pentanethiol                                   | 2.74 | 2.64  | 0.10  |
| 1-Pentanol                                       | 1.4  | 1.26  | 0.14  |
| 1-Penten-3-ol                                    | 0.65 | 1.07  | -0.42 |
| 1-Pentylbenzimidazole                            | 3.63 | 3.02  | 0.61  |
| 1-Pentylbenzotriazole                            | 3.22 | 3.08  | 0.14  |
| 1-Pentyn-3-ol                                    | 0.67 | 0.51  | 0.16  |
| 1-Pentyne                                        | 1.98 | 1.91  | 0.07  |
| 1-Phenethylisothiocyanate                        | 3.46 | 3.96  | -0.50 |
| 1-Phenyl-1,3-butanedione (enol form)             | 2.52 | 2.38  | 0.14  |
| 1-Phenyl-1-propanone                             | 2.19 | 2.15  | 0.04  |
| 1-Phenyl-2-acetamidocyclopropane                 | 1.43 | 2     | -0.57 |
| 1-Phenyl-2-butanol                               | 2.02 | 2.59  | -0.57 |
| 1-Phenyl-2-nitropropene                          | 2.52 | 2.52  | 0.00  |
| 1-Phenylhydrazono-1-cyanoacetic acid methylester | 2.59 | 3.04  | -0.45 |
| 1-Phenyltetrazole                                | 1.09 | 0.8   | 0.29  |
| 1-Propanethiol                                   | 1.81 | 1.76  | 0.05  |
| 1-Propanol                                       | 0.34 | 0.38  | -0.04 |
| 1-Propyl-3-methylimidazolium iodide              | 3.22 | 3.15  | 0.07  |

|                                                |       |       |       |
|------------------------------------------------|-------|-------|-------|
| 1-Propyl-3-methylimidazolium tetrafluoroborate | 4.33  | 4.76  | -0.43 |
| 1-Propylamine                                  | 0.48  | 0.29  | 0.19  |
| 1-Propylbenzotriazole                          | 2.13  | 2.2   | -0.07 |
| 1-Propylpyridinium chloride                    | 2.21  | 2.39  | -0.18 |
| 1-s-Butylbenzotriazole                         | 2.31  | 2.48  | -0.17 |
| 1-Undecanol                                    | 4.54  | 3.9   | 0.64  |
| 2-(2,4,6-Tribromophenoxy)ethanol               | 3.42  | 3.21  | 0.21  |
| 2-(2,4-Dichlorophenoxy)propanoic acid          | 3.43  | 3     | 0.43  |
| 2-(2-Pyridyl)ethanol                           | 0.12  | 0.37  | -0.25 |
| 2-(2-Pyridyl)ethylamine                        | 0.08  | 0.28  | -0.20 |
| 2-(3-Hydroxypropyl)benzimidazole               | 1.25  | 1.38  | -0.13 |
| 2-(3-Pyridyl)ethanol                           | 0.12  | 0.33  | -0.21 |
| 2-(3-Pyridyl)ethylamine                        | 0     | 0.24  | -0.24 |
| 2-(4-Pyridyl)ethanol                           | 0.1   | 0.33  | -0.23 |
| 2-(6-Methoxynaphthalen-2-yl)propanoic acid     | 3.18  | 3.1   | 0.08  |
| 2-(Ethylamino)ethanol                          | -0.46 | -0.52 | 0.06  |
| 2-(Hydroxymethyl)-1-methyl-5-nitroimidazole    | -0.03 | -0.46 | 0.43  |
| 2-(Methylthio)aniline                          | 1.2   | 1.79  | -0.59 |
| 2-(Methylthio)phenyl N-methylcarbamate         | 1.51  | 1.92  | -0.41 |
| 2-(Methylthio)quinoxaline                      | 2.79  | 2.3   | 0.49  |
| 2-(Phenoxymethyl)oxirane                       | 1.6   | 1.96  | -0.36 |
| 2-(Propylamino)ethanol                         | 0.07  | -0.08 | 0.15  |
| 2-(t-Butylamino)ethanol                        | 0.41  | 0.31  | 0.10  |
| 2,2,2-Trichloroethanol                         | 1.42  | 1.27  | 0.15  |
| 2,2,2-Trifluoroethanol                         | 0.41  | 0.53  | -0.12 |
| 2,2,2-Trifluoroethylacetate                    | 1.18  | 1.5   | -0.32 |
| 2,2',3,3',4,4',5,5',6-Nonachlorobiphenyl       | 7.51  | 8.64  | -1.13 |
| 2,2',3,3',4,4',5,5',6-Nonachlorodiphenyl ether | 8.07  | 8.63  | -0.56 |
| 2,2',3,3',4,4',5,5'-Octachlorobiphenyl         | 7.65  | 8.11  | -0.46 |
| 2,2',3,3',4,4',5,5'-Octachlorodiphenyl ether   | 7.78  | 8.1   | -0.32 |
| 2,2',3,3',4,4',5,6,6'-Nonachlorobiphenyl       | 7.88  | 8.64  | -0.76 |
| 2,2',3,3',4,4',5,6'-Octachlorobiphenyl         | 7.43  | 8.11  | -0.68 |
| 2,2',3,3',4,4',5-Heptachlorobiphenyl           | 6.96  | 7.58  | -0.62 |
| 2,2',3,3',4,4',6-Heptachlorobiphenyl           | 7.21  | 8.11  | -0.90 |
| 2,2',3,3',4,4',6-Heptachlorobiphenyl           | 6.68  | 7.58  | -0.90 |
| 2,2',3,3',4,4'-Hexachlorobiphenyl              | 7.32  | 7.05  | 0.27  |
| 2,2',3,3',4,4'-Hexachlorodiphenyl ether        | 6.82  | 7.04  | -0.22 |
| 2,2',3,3',4,5,5',6'-Octachlorobiphenyl         | 7.21  | 8.11  | -0.90 |
| 2,2',3,3',4,5,5',6-Octachlorobiphenyl          | 7.43  | 8.11  | -0.68 |
| 2,2',3,3',4,5,5'-Heptachlorobiphenyl           | 7.03  | 7.58  | -0.55 |
| 2,2',3,3',4,5,6,6'-Octachlorobiphenyl          | 7.35  | 8.11  | -0.76 |
| 2,2',3,3',4,5,6'-Heptachlorobiphenyl           | 6.73  | 7.58  | -0.85 |

|                                            |      |      |       |
|--------------------------------------------|------|------|-------|
| 2,2',3,3',4,5',6-Heptachlorobiphenyl       | 6.92 | 7.58 | -0.66 |
| 2,2',3,3',4,5'-Hexachlorobiphenyl          | 7.39 | 7.05 | 0.34  |
| 2,2',3,3',4,6,6'-Heptachlorobiphenyl       | 6.65 | 7.58 | -0.93 |
| 2,2',3,3',4,6'-Hexachlorobiphenyl          | 7.04 | 7.05 | -0.01 |
| 2,2',3,3',4,6-Hexachlorobiphenyl           | 6.82 | 7.05 | -0.23 |
| 2,2',3,3',4-Pentabromodiphenyl ether       | 6.97 | 7.11 | -0.14 |
| 2,2',3,3',5,5',6,6'-Octachlorobiphenyl     | 7.73 | 8.11 | -0.38 |
| 2,2',3,3',5,5',6-Heptachlorobiphenyl       | 6.85 | 7.58 | -0.73 |
| 2,2',3,3',5,5'-Hexachlorobiphenyl          | 7.07 | 7.05 | 0.02  |
| 2,2',3,3',5,6,6'-Heptachlorobiphenyl       | 6.41 | 7.58 | -1.17 |
| 2,2',3,3',5,6'-Hexachlorobiphenyl          | 7.15 | 7.05 | 0.10  |
| 2,2',3,3',5,6-Hexachlorobiphenyl           | 6.91 | 7.05 | -0.14 |
| 2,2',3,3',6,6'-Hexachlorobiphenyl          | 7.12 | 7.05 | 0.07  |
| 2,2',3,3',6-Pentachlorobiphenyl            | 6.04 | 6.52 | -0.48 |
| 2,2',3,3'-Tetrachlorobiphenyl              | 6.18 | 5.99 | 0.19  |
| 2,2',3,4,4',5,5',6-Octachlorobiphenyl      | 7.21 | 8.11 | -0.90 |
| 2,2',3,4,4',5,5'-Heptachlorobiphenyl       | 6.89 | 7.58 | -0.69 |
| 2,2',3,4,4',5,5'-Heptachlorodiphenyl ether | 7.46 | 7.57 | -0.11 |
| 2,2',3,4,4',5,6,6'-Octachlorobiphenyl      | 7.48 | 8.11 | -0.63 |
| 2,2',3,4,4',5,6-Heptachlorobiphenyl        | 6.92 | 7.58 | -0.66 |
| 2,2',3,4,4',5,6'-Heptachlorobiphenyl       | 6.92 | 7.58 | -0.66 |
| 2,2',3,4,4',5,6-Heptachlorobiphenyl        | 7.13 | 7.58 | -0.45 |
| 2,2',3,4,4',5,6'-Heptachlorodiphenyl ether | 7.5  | 7.57 | -0.07 |
| 2,2',3,4,4',5'-Hexachlorobiphenyl          | 7.25 | 7.05 | 0.20  |
| 2,2',3,4,4',5-Hexachlorobiphenyl           | 7.25 | 7.05 | 0.20  |
| 2,2',3,4,4',5'-Hexachlorodiphenyl ether    | 7.01 | 7.04 | -0.03 |
| 2,2',3,4,4',5-Hexachlorodiphenyl ether     | 7.11 | 7.04 | 0.07  |
| 2,2',3,4,4',6,6'-Heptachlorobiphenyl       | 6.65 | 7.58 | -0.93 |
| 2,2',3,4,4',6'-Hexachlorobiphenyl          | 6.97 | 7.05 | -0.08 |
| 2,2',3,4,4',6-Hexachlorobiphenyl           | 6.95 | 7.05 | -0.10 |
| 2,2',3,4,4',6'-Hexachlorodiphenyl ether    | 6.76 | 7.04 | -0.28 |
| 2,2',3,4,4'-Pentabromodiphenyl ether       | 7.03 | 7.11 | -0.08 |
| 2,2',3,4,4'-Pentachlorobiphenyl            | 6.61 | 6.52 | 0.09  |
| 2,2',3,4,4'-Pentachlorodiphenyl ether      | 6.28 | 6.51 | -0.23 |
| 2,2',3,4,5,5',6-Heptachlorobiphenyl        | 6.99 | 7.58 | -0.59 |
| 2,2',3,4',5,5',6-Heptachlorobiphenyl       | 6.84 | 7.58 | -0.74 |
| 2,2',3,4,5,5'-Hexachlorobiphenyl           | 7.19 | 7.05 | 0.14  |
| 2,2',3,4',5,5'-Hexachlorobiphenyl          | 7.12 | 7.05 | 0.07  |
| 2,2',3,4',5,6,6'-Heptachlorobiphenyl       | 6.78 | 7.58 | -0.80 |
| 2,2',3,4,5,6-Hexachlorobiphenyl            | 6.97 | 7.05 | -0.08 |
| 2,2',3,4',5,6-Hexachlorobiphenyl           | 6.93 | 7.05 | -0.12 |
| 2,2',3,4,5',6-Hexachlorobiphenyl           | 6.79 | 7.05 | -0.26 |

|                                         |      |      |       |
|-----------------------------------------|------|------|-------|
| 2,2',3,4',5',6-Hexachlorobiphenyl       | 6.86 | 7.05 | -0.19 |
| 2,2',3,4',5,6'-Hexachlorobiphenyl       | 6.87 | 7.05 | -0.18 |
| 2,2',3,4',5-Pentachlorobiphenyl         | 6.32 | 6.52 | -0.20 |
| 2,2',3,4,5'-Pentachlorobiphenyl         | 6.37 | 6.52 | -0.15 |
| 2,2',3,4',5'-Pentachlorobiphenyl        | 6.67 | 6.52 | 0.15  |
| 2,2',3,4,6,6'-Hexachlorobiphenyl        | 6.71 | 7.05 | -0.34 |
| 2,2',3,4',6,6'-Hexachlorobiphenyl       | 6.75 | 7.05 | -0.30 |
| 2,2',3,4',6-Pentachlorobiphenyl         | 6.31 | 6.52 | -0.21 |
| 2,2',3,4'-Tetrachlorobiphenyl           | 5.72 | 5.99 | -0.27 |
| 2,2',3,4-Tetrachlorobiphenyl            | 6.11 | 5.99 | 0.12  |
| 2,2',3,5,5',6-Hexachlorobiphenyl        | 6.85 | 7.05 | -0.20 |
| 2,2',3,5,5'-Pentachlorobiphenyl         | 6.97 | 6.52 | 0.45  |
| 2,2',3,5,6,6'-Hexachlorobiphenyl        | 6.51 | 7.05 | -0.54 |
| 2,2',3,5,6-Pentachlorobiphenyl          | 6.06 | 6.52 | -0.46 |
| 2,2',3,5',6-Pentachlorobiphenyl         | 5.92 | 6.52 | -0.60 |
| 2,2',3,5'-Tetrachlorobiphenyl           | 5.81 | 5.99 | -0.18 |
| 2,2',3-Trichlorobiphenyl                | 5.31 | 5.46 | -0.15 |
| 2,2',4,4',5,5'-Hexabromodiphenyl ether  | 7.62 | 7.76 | -0.14 |
| 2,2',4,4',5,5'-Hexachlorobiphenyl       | 7.5  | 7.05 | 0.45  |
| 2,2',4,4',5,5'-Hexachlorodiphenyl ether | 6.72 | 7.04 | -0.32 |
| 2,2',4,4',5,6'-Hexabromodiphenyl ether  | 7.39 | 7.76 | -0.37 |
| 2,2',4,4',5,6'-Hexachlorobiphenyl       | 6.89 | 7.05 | -0.16 |
| 2,2',4,4',5,6'-Hexachlorodiphenyl ether | 6.49 | 7.04 | -0.55 |
| 2,2',4,4',5-Pentabromodiphenyl ether    | 6.97 | 7.11 | -0.14 |
| 2,2',4,4',5-Pentachlorobiphenyl         | 7.21 | 6.52 | 0.69  |
| 2,2',4,4',5-Pentachlorodiphenyl ether   | 6.38 | 6.51 | -0.13 |
| 2,2',4,4',6,6'-Hexabromobiphenyl        | 7.2  | 7.77 | -0.57 |
| 2,2',4,4',6,6'-Hexachlorobiphenyl       | 7.29 | 7.05 | 0.24  |
| 2,2',4,4',6-Pentabromodiphenyl ether    | 6.86 | 7.11 | -0.25 |
| 2,2',4,4',6-Pentachlorobiphenyl         | 6.23 | 6.52 | -0.29 |
| 2,2',4,4',6-Pentachlorodiphenyl ether   | 6.11 | 6.51 | -0.40 |
| 2,2',4,4'-Tetrabromodiphenyl ether      | 6.39 | 6.46 | -0.07 |
| 2,2',4,4'-Tetrachlorobiphenyl           | 6.29 | 5.99 | 0.30  |
| 2,2',4,4'-Tetrachlorodiphenyl ether     | 5.95 | 5.98 | -0.03 |
| 2,2',4,5,5'-PCB                         | 6.5  | 6.52 | -0.02 |
| 2,2',4,5,5'-Pentabromobiphenyl          | 7.1  | 7.12 | -0.02 |
| 2,2',4,5,5'-Pentachlorodiphenyl ether   | 6.22 | 6.51 | -0.29 |
| 2,2',4,5',6-Pentachlorobiphenyl         | 6.11 | 6.52 | -0.41 |
| 2,2',4,5'-Tetrachlorobiphenyl           | 6.38 | 5.99 | 0.39  |
| 2,2',4,6'-Tetrachlorobiphenyl           | 5.51 | 5.99 | -0.48 |
| 2,2',4,6-Tetrachlorobiphenyl            | 5.75 | 5.99 | -0.24 |
| 2,2',4-Tribromodiphenyl ether           | 5.58 | 5.81 | -0.23 |

|                                           |      |      |       |
|-------------------------------------------|------|------|-------|
| 2,2',4-Trichlorobiphenyl                  | 5.76 | 5.46 | 0.30  |
| 2,2',5,5'-Tetrabromobiphenyl              | 6.5  | 6.47 | 0.03  |
| 2,2',5,5'-Tetrachlorobiphenyl             | 6.09 | 5.99 | 0.10  |
| 2,2,5,5-Tetramethyltetrahydrofuran        | 2.06 | 2.13 | -0.07 |
| 2,2',5,6'-Tetrachlorobiphenyl             | 5.98 | 5.99 | -0.01 |
| 2,2',5-Trichlorobiphenyl                  | 5.6  | 5.46 | 0.14  |
| 2,2',6,6'-Tetrachlorobiphenyl             | 5.94 | 5.99 | -0.05 |
| 2,2,6,6-Tetramethyl-N-nitrosopiperidine   | 2.49 | 2.46 | 0.03  |
| 2,2',6-Trichlorobiphenyl                  | 5.48 | 5.46 | 0.02  |
| 2,2'-Dichlorobiphenyl                     | 4.97 | 4.93 | 0.04  |
| 2,2'-Dichlorodiisopropyl ether            | 2.48 | 2.19 | 0.29  |
| 2,2-Dichloroethanol                       | 0.37 | 0.6  | -0.23 |
| 2,2-Dichloropropionic acid                | 0.78 | 0.99 | -0.21 |
| 2,2-Dimethylpropane                       | 3.11 | 2.8  | 0.31  |
| 2,2-Diphenylpropionic acid                | 2.69 | 3.83 | -1.14 |
| 2,3,3',4,4',5,5',6-Octachlorobiphenyl     | 7.62 | 8.11 | -0.49 |
| 2',3,3',4,4',5,6-Heptabromodiphenyl ether | 8.36 | 8.41 | -0.05 |
| 2,3,3',4,4',5,6-Heptachlorobiphenyl       | 7.08 | 7.58 | -0.50 |
| 2,3,3',4,4',5',6-Heptachlorobiphenyl      | 7.21 | 7.58 | -0.37 |
| 2,3,3',4,4',5'-Hexabromodiphenyl ether    | 7.91 | 7.76 | 0.15  |
| 2,3,3',4,4',5-Hexabromodiphenyl ether     | 7.93 | 7.76 | 0.17  |
| 2,3,3',4,4',5'-Hexachlorobiphenyl         | 7.6  | 7.05 | 0.55  |
| 2,3,3',4,4',5-Hexachlorobiphenyl          | 7.57 | 7.05 | 0.52  |
| 2,3,3',4,4',6-Hexachlorobiphenyl          | 7.25 | 7.05 | 0.20  |
| 2,3,3',4,4'-Pentachlorobiphenyl           | 6.65 | 6.52 | 0.13  |
| 2,3,3',4,4'-Pentachlorodiphenyl ether     | 6.51 | 6.51 | 0.00  |
| 2,3,3',4,5,5',6-Heptachlorobiphenyl       | 7.21 | 7.58 | -0.37 |
| 2,3,3',4',5,5',6-Heptachlorobiphenyl      | 7.21 | 7.58 | -0.37 |
| 2,3,3',4,5,5'-Hexachlorobiphenyl          | 7.43 | 7.05 | 0.38  |
| 2,3,3',4',5,5'-Hexachlorobiphenyl         | 7.1  | 7.05 | 0.05  |
| 2,3,3',4,5,6-Hexachlorobiphenyl           | 7.3  | 7.05 | 0.25  |
| 2,3,3',4',5,6-Hexachlorobiphenyl          | 7.25 | 7.05 | 0.20  |
| 2,3,3',4,5',6-Hexachlorobiphenyl          | 7.1  | 7.05 | 0.05  |
| 2,3,3',4',5',6-Hexachlorobiphenyl         | 7.2  | 7.05 | 0.15  |
| 2,3,3',4,5-Pentachlorobiphenyl            | 6.92 | 6.52 | 0.40  |
| 2,3,3',4,6-Pentachlorobiphenyl            | 6.51 | 6.52 | -0.01 |
| 2,3,3',4',6-Pentachlorobiphenyl           | 6.2  | 6.52 | -0.32 |
| 2,3,3',4'-Tetrachlorobiphenyl             | 5.85 | 5.99 | -0.14 |
| 2,3,3',5,5',6-Hexachlorobiphenyl          | 7.37 | 7.05 | 0.32  |
| 2,3,3',5,6-Pentachlorobiphenyl            | 6.41 | 6.52 | -0.11 |
| 2,3,3',5',6-Pentachlorobiphenyl           | 6.45 | 6.52 | -0.07 |
| 2,3,3',5'-Tetrachlorobiphenyl             | 6.17 | 5.99 | 0.18  |

|                                         |      |      |       |
|-----------------------------------------|------|------|-------|
| 2,3,3'-Trichlorobiphenyl                | 5.57 | 5.46 | 0.11  |
| 2,3',4,4',5,5'-Hexachlorobiphenyl       | 7.5  | 7.05 | 0.45  |
| 2,3',4,4',5,5'-Hexachlorodiphenyl ether | 7.11 | 7.04 | 0.07  |
| 2,3,4,4',5,6-Hexachlorobiphenyl         | 7.31 | 7.05 | 0.26  |
| 2,3',4,4',5',6-Hexachlorobiphenyl       | 7.17 | 7.05 | 0.12  |
| 2,3',4,4',5'-Pentachlorobiphenyl        | 6.64 | 6.52 | 0.12  |
| 2,3',4,4',5-Pentachlorobiphenyl         | 6.57 | 6.52 | 0.05  |
| 2,3,4,4',6-Pentabromodiphenyl ether     | 6.97 | 7.11 | -0.14 |
| 2,3,4,4',6-Pentachlorobiphenyl          | 6.44 | 6.52 | -0.08 |
| 2,3',4,4',6-Pentachlorobiphenyl         | 6.4  | 6.52 | -0.12 |
| 2,3',4,4'-Tetrabromodiphenyl ether      | 6.16 | 6.46 | -0.30 |
| 2,3,4,4'-Tetrachlorobiphenyl            | 5.84 | 5.99 | -0.15 |
| 2,3',4,4'-Tetrachlorobiphenyl           | 6.31 | 5.99 | 0.32  |
| 2,3',4,4'-Tetrachlorodiphenyl ether     | 6.13 | 5.98 | 0.15  |
| 2,3,4,5,6-Pentachlorobiphenyl           | 6.74 | 6.52 | 0.22  |
| 2,3',4,5',6-Pentachlorobiphenyl         | 6.42 | 6.52 | -0.10 |
| 2,3,4',5,6-Pentachlorobiphenyl          | 6.39 | 6.52 | -0.13 |
| 2,3,4,5-Tetrachloroaniline              | 4.27 | 3.44 | 0.83  |
| 2,3,4,5-Tetrachloroanisole              | 4.5  | 4.28 | 0.22  |
| 2,3',4',5'-Tetrachlorobiphenyl          | 5.98 | 5.99 | -0.01 |
| 2,3,4,5-Tetrachlorobiphenyl             | 6.41 | 5.99 | 0.42  |
| 2,3',4,5-Tetrachlorobiphenyl            | 6.32 | 5.99 | 0.33  |
| 2,3,4',5-Tetrachlorobiphenyl            | 6.1  | 5.99 | 0.11  |
| 2,3',4',5-Tetrachlorobiphenyl           | 6.23 | 5.99 | 0.24  |
| 2,3,4,5-Tetrachloronitrobenzene         | 3.93 | 4.22 | -0.29 |
| 2,3,4,5-Tetrachlorophenol               | 4.21 | 3.95 | 0.26  |
| 2,3',4,6-Tetrabromodiphenyl ether       | 6.16 | 6.46 | -0.30 |
| 2,3,4',6-Tetrachlorobiphenyl            | 5.76 | 5.99 | -0.23 |
| 2,3,4,6-Tetrachlorophenol               | 3.88 | 3.95 | -0.07 |
| 2,3,4,7,8-Pentachlorodibenzofuran       | 6.92 | 6.65 | 0.27  |
| 2',3,4-Tribromodiphenyl ether           | 5.58 | 5.81 | -0.23 |
| 2,3,4-Trichloroanisole                  | 4.03 | 3.75 | 0.28  |
| 2,3',4'-Trichlorobiphenyl               | 5.87 | 5.46 | 0.41  |
| 2,3,4-Trichlorobiphenyl                 | 5.86 | 5.46 | 0.40  |
| 2,3',4-Trichlorobiphenyl                | 5.54 | 5.46 | 0.08  |
| 2,3,4'-Trichlorobiphenyl                | 5.42 | 5.46 | -0.04 |
| 2,3,4-Trichloronitrobenzene             | 3.61 | 3.69 | -0.08 |
| 2,3,4-Trichlorophenol                   | 3.61 | 3.42 | 0.19  |
| 2,3,5,6-Tetrachloroaniline              | 4.1  | 3.44 | 0.66  |
| 2,3,5,6-Tetrachloroanisole              | 4.4  | 4.28 | 0.12  |
| 2,3,5,6-Tetrachlorobiphenyl             | 5.96 | 5.99 | -0.03 |
| 2,3,5,6-Tetrachloronitrobenzene         | 4.38 | 4.22 | 0.16  |

|                                          |       |       |       |
|------------------------------------------|-------|-------|-------|
| 2,3,5,6-Tetrachlorophenol                | 3.88  | 3.95  | -0.07 |
| 2,3,5,6-Tetrafluorothiophenol            | 1.76  | 2.28  | -0.52 |
| 2,3,5,6-Tetramethyl-1,4-benzoquinone     | 2.23  | 1.61  | 0.62  |
| 2,3,5,6-Tetramethyl-4-hydroxyacetanilide | 1.44  | 2.44  | -1.00 |
| 2,3',5'-Trichlorobiphenyl                | 5.71  | 5.46  | 0.25  |
| 2,3',5-Trichlorobiphenyl                 | 5.76  | 5.46  | 0.30  |
| 2,3,5-Trimethyl-4-hydroxyacetanilide     | 1.3   | 2.1   | -0.80 |
| 2,3,6-Trichlorobiphenyl                  | 5.67  | 5.46  | 0.21  |
| 2,3,6-Trimethyl-4-hydroxyacetanilide     | 1.24  | 2.1   | -0.86 |
| 2,3,6-Trimethylnaphthalene               | 4.73  | 4.51  | 0.22  |
| 2,3,6-Trimethylphenol                    | 2.67  | 2.85  | -0.18 |
| 2,3,7,8-Tetrachlorodibenzofuran          | 6.53  | 6.12  | 0.41  |
| 2,3,7,8-Tetrachlorodibenzo-p-dioxin      | 6.53  | 6.11  | 0.42  |
| 2,3,7-Trichlorodibenzo-p-dioxin          | 6.46  | 5.58  | 0.88  |
| 2,3,8-Trichlorodibenzofuran              | 5.75  | 5.59  | 0.16  |
| 2,3-Butanedione                          | -1.34 | -0.45 | -0.89 |
| 2,3-Butyl dinitrate                      | 2.36  | 2.37  | -0.01 |
| 2,3-Butyleneglycol                       | -0.92 | -0.19 | -0.73 |
| 2,3-Dibromo-1-propanol                   | 0.63  | 0.89  | -0.26 |
| 2,3-Dichloroaniline                      | 2.78  | 2.38  | 0.40  |
| 2,3-Dichloroanisole                      | 3.24  | 3.22  | 0.02  |
| 2,3'-Dichlorobiphenyl                    | 5.02  | 4.93  | 0.09  |
| 2,3-Dichlorobiphenyl                     | 4.99  | 4.93  | 0.06  |
| 2,3-Dichlorodibenzofuran                 | 5.43  | 5.06  | 0.37  |
| 2,3-Dichlorodibenzo-p-dioxin             | 5.8   | 5.05  | 0.75  |
| 2,3-Dichloronaphthalene                  | 4.51  | 4.29  | 0.22  |
| 2,3-Dichloronitrobenzene                 | 3.05  | 3.16  | -0.11 |
| 2,3-Dichlorophenyl N-methylcarbamate     | 2.48  | 2.51  | -0.03 |
| 2,3-Dichloropyridine                     | 2.11  | 2.06  | 0.05  |
| 2,3-Dichlorothiophenol                   | 2.44  | 3.26  | -0.82 |
| 2,3-Dimethoxyamphetamine                 | 1.49  | 1.88  | -0.39 |
| 2,3-Dimethyl-4-hydroxyacetanilide        | 1.06  | 1.76  | -0.70 |
| 2,3-Dimethylbutane                       | 3.85  | 3.25  | 0.60  |
| 2,3-Dimethylphenyl N-methylcarbamate     | 1.95  | 2.13  | -0.18 |
| 2,3-Xylenol                              | 2.42  | 2.51  | -0.09 |
| 2,3-Xylidine                             | 1.81  | 2     | -0.19 |
| 2,4,4',5-Tetrachlorobiphenyl             | 6.67  | 5.99  | 0.68  |
| 2,4,4',5-Tetrachlorodiphenyl ether       | 5.99  | 5.98  | 0.01  |
| 2,4,4',6-Tetrachlorobiphenyl             | 6.03  | 5.99  | 0.04  |
| 2,4,4'-Tribromodiphenyl ether            | 5.8   | 5.81  | -0.01 |
| 2,4,4'-Trichlorobiphenyl                 | 5.62  | 5.46  | 0.16  |
| 2,4,4'-Trichlorodiphenyl ether           | 5.53  | 5.45  | 0.08  |

|                                         |       |       |       |
|-----------------------------------------|-------|-------|-------|
| 2,4,5-T                                 | 3.13  | 3.06  | 0.07  |
| 2,4,5-Trichloroaniline                  | 3.69  | 2.91  | 0.78  |
| 2,4,5-Trichlorobiphenyl                 | 5.9   | 5.46  | 0.44  |
| 2,4',5-Trichlorobiphenyl                | 5.79  | 5.46  | 0.33  |
| 2,4,5-Trichlorodiphenyl ether           | 5.58  | 5.45  | 0.13  |
| 2,4',5-Trichlorodiphenyl ether          | 5.7   | 5.45  | 0.25  |
| 2,4,5-Trichloronitrobenzene             | 3.47  | 3.69  | -0.22 |
| 2,4,5-Trichlorophenol                   | 3.72  | 3.42  | 0.30  |
| 2,4,5-Trichlorotoluene                  | 4.78  | 4.16  | 0.62  |
| 2,4,5-Trimethylphenyl N-methylcarbamate | 2.52  | 2.47  | 0.05  |
| 2,4,5-Trioxoimidazolidine               | -0.58 | -1.52 | 0.94  |
| 2,4,6-Collidine                         | 1.88  | 1.98  | -0.10 |
| 2,4,6-Tribromobiphenyl                  | 6.03  | 5.82  | 0.21  |
| 2,4,6-Tribromodiphenyl ether            | 5.58  | 5.81  | -0.23 |
| 2,4',6-Tribromodiphenyl ether           | 5.59  | 5.81  | -0.22 |
| 2,4,6-Tribromophenol                    | 3.96  | 3.78  | 0.18  |
| 2,4,6-Tribromoresorcinol                | 4.37  | 3.38  | 0.99  |
| 2,4,6-Trichloroanisole                  | 4.02  | 3.75  | 0.27  |
| 2,4,6-Trichlorobiphenyl                 | 5.71  | 5.46  | 0.25  |
| 2,4',6-Trichlorobiphenyl                | 5.75  | 5.46  | 0.29  |
| 2,4,6-Trichlorodibenzofuran             | 5.69  | 5.59  | 0.10  |
| 2,4,6-Trichloronitrobenzene             | 3.69  | 3.69  | 0.00  |
| 2,4,6-Trichlorophenol                   | 3.69  | 3.42  | 0.27  |
| 2,4,6-Trichloropurine                   | 3.9   | 3.36  | 0.54  |
| 2,4,6-Trimethylphenyl isocyanate        | 3.21  | 3.31  | -0.10 |
| 2,4,6-Trinitrophenol                    | 1.33  | 1.95  | -0.62 |
| 2,4,8-Trichlorodibenzofuran             | 5.69  | 5.59  | 0.10  |
| 2,4-Diaminobenzoic acid                 | -1.14 | -1.69 | 0.55  |
| 2,4-Diaminophenol                       | -0.61 | 0.01  | -0.62 |
| 2,4-Dibromo-2,4-dimethyl-3-pentanone    | 1.97  | 2.13  | -0.16 |
| 2,4'-Dibromodiphenyl ether              | 5.03  | 5.16  | -0.13 |
| 2,4-Dibromodiphenyl ether               | 5.03  | 5.16  | -0.13 |
| 2,4-Dibromophenol                       | 3.22  | 3.13  | 0.09  |
| 2,4-Dichloro-beta-nitrostyrene          | 3.26  | 3.27  | -0.01 |
| 2,4'-Dichlorobiphenyl                   | 5.1   | 4.93  | 0.17  |
| 2,4-Dichlorobiphenyl                    | 5.15  | 4.93  | 0.22  |
| 2,4-Dichlorodiphenyl ether              | 4.93  | 4.92  | 0.01  |
| 2,4-Dichloronitrobenzene                | 3.09  | 3.16  | -0.07 |
| 2,4-Dichlorophenol                      | 3.06  | 2.89  | 0.17  |
| 2,4-Dichlorophenoxyacetic acid          | 2.58  | 2.53  | 0.05  |
| 2,4-Dichlorothiophenol                  | 2.49  | 3.26  | -0.77 |
| 2,4-Dichlorotoluene                     | 4.24  | 3.63  | 0.61  |

|                                      |       |       |       |
|--------------------------------------|-------|-------|-------|
| 2,4-Difluorophenol                   | 1.9   | 1.87  | 0.03  |
| 2,4-Difluorothiophenol               | 1.34  | 2.24  | -0.90 |
| 2,4-Dimethoxyamphetamine             | 1.75  | 1.88  | -0.13 |
| 2,4-Dimethylthiophenol               | 3.77  | 2.88  | 0.89  |
| 2,4-Dinitroanisole                   | 1.61  | 1.9   | -0.29 |
| 2,4-Dinitrophenol                    | 1.67  | 1.57  | 0.10  |
| 2,4-Dinitrotoluene                   | 1.98  | 2.31  | -0.33 |
| 2,4-Imidazolidinedione               | -1.69 | -1.01 | -0.68 |
| 2,4-Nonanedione                      | 1.65  | 1.75  | -0.10 |
| 2,4-Octanedione                      | 1.13  | 1.31  | -0.18 |
| 2,4-Xylenol                          | 2.35  | 2.51  | -0.16 |
| 2,5-Diamino-1,3,4-thiadiazole        | 0.52  | 1.07  | -0.55 |
| 2,5-Diaminonitrobenzene              | 0.53  | 0.79  | -0.26 |
| 2,5-Dichloroaniline                  | 2.75  | 2.38  | 0.37  |
| 2,5-Dichlorobiphenyl                 | 5.16  | 4.93  | 0.23  |
| 2,5-Dichlorophenol                   | 3.2   | 2.89  | 0.31  |
| 2,5-Dichlorophenyl N-methylcarbamate | 2.44  | 2.51  | -0.07 |
| 2,5-Dichloropyridine                 | 2.4   | 2.06  | 0.34  |
| 2,5-Dichlorothiophenol               | 2.48  | 3.26  | -0.78 |
| 2,5-Dihydrofuran                     | 0.46  | 0.79  | -0.33 |
| 2,5-Dihydroxybenzoic acid            | 1.18  | 1.16  | 0.02  |
| 2,5-Dimethoxyamphetamine             | 1.88  | 1.88  | 0.00  |
| 2,5-Dimethyl-4-hydroxyacetanilide    | 1.09  | 1.76  | -0.67 |
| 2,5-Dimethylphenyl N-methylcarbamate | 2.03  | 2.13  | -0.10 |
| 2,5-Dimethylpyrazine                 | 0.63  | 0.29  | 0.34  |
| 2,5-Dimethylthiophenol               | 3.92  | 2.88  | 1.04  |
| 2,5-Dinitrophenol                    | 1.86  | 2.08  | -0.22 |
| 2,5-Hexyl dinitrate                  | 3.09  | 3.25  | -0.16 |
| 2,5-Xylenol                          | 2.34  | 2.51  | -0.17 |
| 2,5-Xylidine                         | 1.86  | 2     | -0.14 |
| 2,6-Dibromo-4-nitrophenol            | 3.05  | 3     | 0.05  |
| 2,6-Dibromodiphenyl ether            | 5.03  | 5.16  | -0.13 |
| 2,6-Dichloro-4-nitrophenol           | 2.94  | 2.76  | 0.18  |
| 2,6-Dichloroanisole                  | 3.14  | 3.22  | -0.08 |
| 2,6-Dichlorobenzonitrile             | 2.74  | 2.66  | 0.08  |
| 2,6-Dichlorobiphenyl                 | 4.98  | 4.93  | 0.05  |
| 2,6-Dichlorodiphenyl ether           | 4.64  | 4.92  | -0.28 |
| 2,6-Dichlorophenol                   | 2.75  | 2.89  | -0.14 |
| 2,6-Dichloropyridine                 | 2.15  | 2.18  | -0.03 |
| 2,6-Dichlorosyringaldehyde           | 2.52  | 2.09  | 0.43  |
| 2,6-Dichlorothiophenol               | 2.35  | 3.26  | -0.91 |
| 2,6-Dichlorotoluene                  | 4.29  | 3.63  | 0.66  |

|                                        |       |       |       |
|----------------------------------------|-------|-------|-------|
| 2,6-Difluoropyridine                   | 1.17  | 1.4   | -0.23 |
| 2,6-Dihydroxybenzoic acid              | 2.2   | 1.67  | 0.53  |
| 2,6-Diisopropylaniline                 | 3.18  | 3.44  | -0.26 |
| 2,6-Diisopropylphenol                  | 3.79  | 3.95  | -0.16 |
| 2,6-Dimethoxyphenol                    | 1.15  | 1.69  | -0.54 |
| 2,6-Dimethyl-4-hydroxyacetanilide      | 0.8   | 1.76  | -0.96 |
| 2,6-Dimethyl-N,N'-dinitrosopiperazine  | 0.08  | -0.07 | 0.15  |
| 2,6-Dimethylnaphthalene                | 4.31  | 4.15  | 0.16  |
| 2,6-Dimethyl-N-nitrosomorpholine       | 0.32  | 0.2   | 0.12  |
| 2,6-Dimethyl-N-nitrosopiperidine       | 1.36  | 1.66  | -0.30 |
| 2,6-Dimethylphenyl isocyanate          | 2.74  | 2.97  | -0.23 |
| 2,6-Dimethylpyrazine                   | 0.54  | 0.29  | 0.25  |
| 2,6-Dimethylthiophenol                 | 4.02  | 2.88  | 1.14  |
| 2,6-Dinitroaniline                     | 1.79  | 2.08  | -0.29 |
| 2,6-Dinitrophenol                      | 1.33  | 2.08  | -0.75 |
| 2,6-Dinitrotoluene                     | 2.1   | 2.31  | -0.21 |
| 2,6-Diphenylpyridine                   | 4.82  | 4.24  | 0.58  |
| 2,6-Di-s-butylphenol                   | 4.36  | 4.83  | -0.47 |
| 2,6-Di-t-butylpyridine                 | 4.14  | 3.8   | 0.34  |
| 2,6-Lutidine                           | 1.68  | 1.64  | 0.04  |
| 2,6-Xylenol                            | 2.36  | 2.51  | -0.15 |
| 2,7-Dichlorodibenzofuran               | 5.41  | 5.06  | 0.35  |
| 2,7-Dichlorodibenzo-p-dioxin           | 5.77  | 5.05  | 0.72  |
| 2,7-Dichloronaphthalene                | 4.56  | 4.29  | 0.27  |
| 2,8-Dichlorodibenzofuran               | 5.65  | 5.06  | 0.59  |
| 2,8-Dichlorodibenzo-p-dioxin           | 5.77  | 5.05  | 0.72  |
| 2,beta-Dinitrostyrene                  | 1.8   | 2.08  | -0.28 |
| 2,N,N-Trimethylaniline                 | 2.85  | 2.26  | 0.59  |
| 2,5-Dichloronitrobenzene               | 3.03  | 3.16  | -0.13 |
| 2-Acetamido-1,4-naphthoquinone         | 1.29  | 0.76  | 0.53  |
| 2-Acetamidopyridine                    | 0.61  | 0.97  | -0.36 |
| 2-Acetoxyanisole                       | 1.38  | 2.11  | -0.73 |
| 2-Acetylphenoxyacetic acid             | 1.25  | 0.95  | 0.30  |
| 2-Acetylphenyl N,N-dimethylcarbamate   | 0.93  | 1.27  | -0.34 |
| 2-Amino-1,3-propanediol                | -2.15 | -2.12 | -0.03 |
| 2-Amino-1,7-dihydro-6H-purine-6-thione | -0.07 | -0.21 | 0.14  |
| 2-Amino-1-hexanol                      | 0.6   | 0.27  | 0.33  |
| 2-Amino-1-pentanol                     | 0.07  | -0.17 | 0.24  |
| 2-Amino-3,3-dimethyl-1-butanol         | 0.34  | 0.03  | 0.31  |
| 2-Amino-4-methyl-1-pentanol            | 0.47  | 0.11  | 0.36  |
| 2-Amino-4-picoline                     | 0.56  | 1.15  | -0.59 |
| 2-Amino-4-pyrimidone                   | -0.99 | -1.25 | 0.26  |

|                                     |       |       |       |
|-------------------------------------|-------|-------|-------|
| 2-Amino-5-methylpyridine            | 1.02  | 1.15  | -0.13 |
| 2-Amino-5-phenylvaleric acid        | -0.36 | -0.3  | -0.06 |
| 2-Aminoacridine                     | 2.62  | 2.77  | -0.15 |
| 2-aminodiphenyl ether               | 2.46  | 2.95  | -0.49 |
| 2-Aminoisobutanol                   | -0.59 | -0.65 | 0.06  |
| 2-Aminopentane                      | 1.23  | 1.16  | 0.07  |
| 2-Aminophenol                       | 0.57  | 0.92  | -0.35 |
| 2-Aminopyridine                     | 0.58  | 0.81  | -0.23 |
| 2-Aminopyrimidine                   | -0.22 | -0.34 | 0.12  |
| 2-Aminoquinazolin-4-one             | 0.6   | 0.93  | -0.33 |
| 2-Aminoquinoline                    | 1.87  | 2.21  | -0.34 |
| 2-Anthracenylisothiocyanate         | 5.7   | 5.18  | 0.52  |
| 2-Azacyclooctanethione              | 1     | 1.22  | -0.22 |
| 2-Azacyclopentathione               | -0.05 | 0.32  | -0.37 |
| 2-Benzimidazolethiol                | 1.66  | 1.7   | -0.04 |
| 2-Bromo-3-methylbutyric acid        | 1.48  | 1.68  | -0.20 |
| 2-Bromoaniline                      | 2.29  | 1.97  | 0.32  |
| 2-Bromoanisole                      | 2.86  | 2.81  | 0.05  |
| 2-Bromobutanoic acid                | 1.42  | 1.4   | 0.02  |
| 2-Bromobutyric acid methyl ester    | 1.49  | 1.73  | -0.24 |
| 2-Bromoethanol                      | 0.23  | 0.08  | 0.15  |
| 2-Bromohexanoic acid                | 2.14  | 2.28  | -0.14 |
| 2-Bromoisobutyric acid              | 0.86  | 1.01  | -0.15 |
| 2-Bromonitrobenzene                 | 2.51  | 2.75  | -0.24 |
| 2-Bromooctanoic acid                | 3.19  | 3.16  | 0.03  |
| 2-Bromophenol                       | 2.35  | 2.48  | -0.13 |
| 2-Bromophenoxyacetic acid           | 2.1   | 2.12  | -0.02 |
| 2-Bromophenyl N-methylcarbamate     | 1.77  | 2.1   | -0.33 |
| 2-Bromophenylacetate                | 2.2   | 2.83  | -0.63 |
| 2-Bromopropane                      | 2.14  | 2.08  | 0.06  |
| 2-Bromopropanoic acid               | 0.92  | 0.96  | -0.04 |
| 2-Bromopropionitrile                | 0.89  | 1.11  | -0.22 |
| 2-Bromothiophenol                   | 2.44  | 2.85  | -0.41 |
| 2-Bromotoluene                      | 2.92  | 3.22  | -0.30 |
| 2-Bromovaleric acid                 | 1.61  | 1.84  | -0.23 |
| 2-Butanol                           | 0.61  | 0.85  | -0.24 |
| 2-Butanone                          | 0.69  | 0.85  | -0.16 |
| 2-Buten-1-ol                        | 0.34  | 0.42  | -0.08 |
| 2-Butylamine                        | 0.74  | 0.72  | 0.02  |
| 2-Butylthiophenyl N-methylcarbamate | 2.98  | 3.08  | -0.10 |
| 2-Butyn-1,4-diol                    | -0.72 | -0.73 | 0.01  |
| 2-Butyn-1-ol                        | 0.37  | 0.34  | 0.03  |

|                                      |       |       |       |
|--------------------------------------|-------|-------|-------|
| 2-Butyne                             | 1.46  | 1.75  | -0.29 |
| 2-Butynyl acetate                    | 0.81  | 1.31  | -0.50 |
| 2-Chloro-1,4-naphthoquinone          | 2.15  | 1.7   | 0.45  |
| 2-Chloro-1-ethylbenzene              | 2.95  | 3.54  | -0.59 |
| 2-Chloro-2-methylbutane              | 2.52  | 2.78  | -0.26 |
| 2-Chloro-4-phenylenediamine          | 0.85  | 0.94  | -0.09 |
| 2-Chloro-5-nitro-beta-nitrostyrene   | 2.23  | 2.61  | -0.38 |
| 2-Chloro-6-(trichloromethyl)pyridine | 3.41  | 3.24  | 0.17  |
| 2-Chloro-6-nitrotoluene              | 3.09  | 2.97  | 0.12  |
| 2-Chloroaniline                      | 1.88  | 1.85  | 0.03  |
| 2-Chloroanisole                      | 2.5   | 2.69  | -0.19 |
| 2-Chlorobenzenesulfonamide           | 0.74  | 0.99  | -0.25 |
| 2-Chlorobenzoic acid                 | 2.05  | 1.98  | 0.07  |
| 2-Chloro-beta-nitrostyrene           | 2.44  | 2.74  | -0.30 |
| 2-Chlorobiphenyl                     | 4.53  | 4.4   | 0.13  |
| 2-Chlorodibenzofuran                 | 4.37  | 4.53  | -0.16 |
| 2-Chlorodibenzo-p-dioxin             | 5.45  | 4.52  | 0.93  |
| 2-Chlorodiphenyl ether               | 4.45  | 4.39  | 0.06  |
| 2-Chloroethanol                      | -0.06 | 0     | -0.06 |
| 2-Chloroisoniazid                    | 0.11  | -0.43 | 0.54  |
| 2-Chloronaphthalene                  | 4.14  | 3.76  | 0.38  |
| 2-Chloronitrobenzene                 | 2.52  | 2.63  | -0.11 |
| 2-Chlorophenol                       | 2.15  | 2.36  | -0.21 |
| 2-Chlorophenoxyacetic acid           | 2.02  | 2     | 0.02  |
| 2-Chlorophenylacetate                | 2.18  | 2.71  | -0.53 |
| 2-Chloropropane                      | 1.9   | 1.96  | -0.06 |
| 2-Chloropropionitrile                | 0.75  | 0.99  | -0.24 |
| 2-Chloropyridine                     | 1.28  | 1.53  | -0.25 |
| 2-Chloroquinoline                    | 2.71  | 2.93  | -0.22 |
| 2-Chloroquinoxaline                  | 2.23  | 1.98  | 0.25  |
| 2-Chlorosyringaldehyde               | 1.81  | 1.56  | 0.25  |
| 2-Chlorothiophenol                   | 2.27  | 2.73  | -0.46 |
| 2-Chlorotoluene                      | 3.52  | 3.1   | 0.42  |
| 2-Cyano-6-methylpyridine             | 0.84  | 0.67  | 0.17  |
| 2-Cyanophenyl N-methylcarbamate      | 0.86  | 0.82  | 0.04  |
| 2-Cyanophenylacetate                 | 1.33  | 1.55  | -0.22 |
| 2-Decanone                           | 3.73  | 3.49  | 0.24  |
| 2-Decyn-1-ol                         | 3.54  | 2.98  | 0.56  |
| 2-Diethylaminoethanol                | 0.48  | 0.44  | 0.04  |
| 2-Dodecanone                         | 4.55  | 4.37  | 0.18  |
| 2-Ethoxyethanol                      | -0.54 | -0.2  | -0.34 |
| 2-Ethoxyethylacetate                 | 0.65  | 0.77  | -0.12 |

|                                  |       |       |       |
|----------------------------------|-------|-------|-------|
| 2-Ethoxyphenol                   | 1.68  | 2.19  | -0.51 |
| 2-Ethoxyphenyl N-methylcarbamate | 1.24  | 1.81  | -0.57 |
| 2-Ethylaniline                   | 1.74  | 2.1   | -0.36 |
| 2-Ethylbutanoic acid             | 1.68  | 1.75  | -0.07 |
| 2-Ethylbutyl acetate             | 2.7   | 2.51  | 0.19  |
| 2-Ethylhexanal                   | 2.73  | 2.75  | -0.02 |
| 2-Ethylhexanoic acid             | 2.64  | 2.63  | 0.01  |
| 2-Ethylhexylamine                | 2.82  | 2.33  | 0.49  |
| 2-Ethyl-naphthalene              | 4.38  | 4.25  | 0.13  |
| 2-Ethylphenoxyacetic acid        | 2.65  | 2.25  | 0.40  |
| 2-Ethylphenyl N-methylcarbamate  | 1.93  | 2.23  | -0.30 |
| 2-Ethylphenylacetate             | 2.42  | 2.96  | -0.54 |
| 2-Ethylpyridine                  | 1.69  | 1.7   | -0.01 |
| 2-Ethyltoluene                   | 3.53  | 3.53  | 0.00  |
| 2-Fluoroaniline                  | 1.38  | 1.34  | 0.04  |
| 2-Fluoroethanol                  | -0.92 | -0.62 | -0.30 |
| 2-Fluoroisoniazid                | -0.11 | -0.82 | 0.71  |
| 2-Fluorophenol                   | 1.71  | 1.85  | -0.14 |
| 2-Fluorophenoxyacetic acid       | 1.26  | 1.49  | -0.23 |
| 2-Fluorophenyl N-methylcarbamate | 1.25  | 1.47  | -0.22 |
| 2-Fluorophenylacetate            | 1.76  | 2.2   | -0.44 |
| 2-Fluorophenylacetic acid        | 1.5   | 1.91  | -0.41 |
| 2-Fluoropyridine                 | 0.84  | 1.14  | -0.30 |
| 2-Fluorothiophenol               | 1.9   | 2.22  | -0.32 |
| 2-Heptanol                       | 2.31  | 2.17  | 0.14  |
| 2-Heptanone                      | 1.98  | 2.17  | -0.19 |
| 2-Heptanone oxime                | 2.24  | 1.9   | 0.34  |
| 2-Heptyn-1-ol                    | 1.95  | 1.66  | 0.29  |
| 2-Hexenoic acid                  | 1.94  | 1.51  | 0.43  |
| 2-Hexyn-1-ol                     | 1.42  | 1.22  | 0.20  |
| 2-Hydroxyacetanilide             | 0.72  | 1.08  | -0.36 |
| 2-Hydroxyacetophenone            | 1.92  | 1.82  | 0.10  |
| 2-Hydroxybenzaldehyde            | 1.7   | 1.68  | 0.02  |
| 2-Hydroxybenzamide               | 0.89  | 0.67  | 0.22  |
| 2-Hydroxybenzonitrile            | 1.61  | 1.2   | 0.41  |
| 2-Hydroxybenzophenone            | 3.52  | 3.12  | 0.40  |
| 2-Hydroxybenzylalcohol           | 0.73  | 1.35  | -0.62 |
| 2-Hydroxybiphenyl                | 3.09  | 3.47  | -0.38 |
| 2-Hydroxyphenoxyacetic acid      | 0.85  | 1.07  | -0.22 |
| 2-Iodoaniline                    | 2.32  | 2.33  | -0.01 |
| 2-Iodobenzoic acid               | 2.4   | 2.46  | -0.06 |
| 2-Iodophenol                     | 2.65  | 2.84  | -0.19 |

|                                   |       |       |       |
|-----------------------------------|-------|-------|-------|
| 2-Iodophenoxyacetic acid          | 2.44  | 2.48  | -0.04 |
| 2-Iodophenyl N-methylcarbamate    | 1.96  | 2.46  | -0.50 |
| 2-Iodophenylacetate               | 2.55  | 3.19  | -0.64 |
| 2-Isopropoxyphenol                | 2.09  | 2.66  | -0.57 |
| 2-Isopropyl-5-methylphenol        | 3.3   | 3.23  | 0.07  |
| 2-Isopropylphenoxyacetic acid     | 2.84  | 2.53  | 0.31  |
| 2-Isopropylphenylacetate          | 2.78  | 3.24  | -0.46 |
| 2-Isopropyltoluene                | 4.1   | 3.83  | 0.27  |
| 2-Methoxyacetanilide              | 0.98  | 1.41  | -0.43 |
| 2-Methoxyaniline                  | 0.95  | 1.25  | -0.30 |
| 2-Methoxybenzamide                | 0.87  | 0.49  | 0.38  |
| 2-Methoxybenzylalcohol            | 1.13  | 1.68  | -0.55 |
| 2-Methoxyethylamine               | -0.67 | -0.72 | 0.05  |
| 2-Methoxyisoniazid                | -0.1  | -0.01 | -0.09 |
| 2-Methoxynitrobenzene             | 1.73  | 2.03  | -0.30 |
| 2-Methoxyphenol                   | 1.32  | 1.76  | -0.44 |
| 2-Methoxyphenoxyacetic acid       | 0.98  | 1.4   | -0.42 |
| 2-Methoxyphenyl N-methylcarbamate | 0.81  | 1.38  | -0.57 |
| 2-Methoxyquinoxaline              | 2.31  | 2.4   | -0.09 |
| 2-Methyl valeraldehyde            | 1.67  | 1.87  | -0.20 |
| 2-Methyl-1-propanol               | 0.76  | 0.66  | 0.10  |
| 2-Methyl-2-butanamine             | 1.1   | 1.12  | -0.02 |
| 2-Methyl-2-butanol                | 0.89  | 1.06  | -0.17 |
| 2-Methyl-2-propanol               | 0.37  | 0.62  | -0.25 |
| 2-Methyl-2-propenol               | 0.21  | 0.57  | -0.36 |
| 2-Methyl-4-hydroxyacetanilide     | 0.66  | 1.42  | -0.76 |
| 2-Methyl-5-octyn-4-ol             | 2.66  | 2.41  | 0.25  |
| 2-Methyl-8-quinolinol             | 2.33  | 2.22  | 0.11  |
| 2-Methylaminoethanol              | -0.94 | -1.07 | 0.13  |
| 2-Methylanthracene                | 5     | 4.87  | 0.13  |
| 2-Methylbenzaldehyde              | 2.26  | 1.91  | 0.35  |
| 2-Methylbenzalmalonodinitrile     | 2.1   | 1.86  | 0.24  |
| 2-Methylbenzenesulfonamide        | 0.84  | 0.8   | 0.04  |
| 2-Methylbenzoic acid              | 2.46  | 1.79  | 0.67  |
| 2-Methylbenzylalcohol             | 1.58  | 1.58  | 0.00  |
| 2-Methyl-beta-nitrostyrene        | 2.63  | 2.55  | 0.08  |
| 2-Methylbutylamine                | 1.32  | 1.01  | 0.31  |
| 2-Methylbutyraldehyde             | 1.14  | 1.43  | -0.29 |
| 2-Methylfuran                     | 1.85  | 1.93  | -0.08 |
| 2-Methylimidazole                 | 0.49  | -0.11 | 0.60  |
| 2-Methylimidazoline               | 0.52  | 0.15  | 0.37  |
| 2-Methylindole                    | 2.6   | 3.24  | -0.64 |

|                                        |       |       |       |
|----------------------------------------|-------|-------|-------|
| 2-Methylisoniazid                      | -0.37 | -0.7  | 0.33  |
| 2-Methyl-N,N'-dinitrosopiperazine      | -0.28 | -0.5  | 0.22  |
| 2-Methylnaphthalene                    | 3.86  | 3.79  | 0.07  |
| 2-Methyl-N-nitrosopiperidine           | 0.71  | 1.23  | -0.52 |
| 2-Methylphenanthrene                   | 5.24  | 4.87  | 0.37  |
| 2-Methylphenoxyacetic acid             | 1.98  | 1.81  | 0.17  |
| 2-Methylphenoxyacetic acid methylester | 2.08  | 2.14  | -0.06 |
| 2-Methylpropanal                       | 0.61  | 0.99  | -0.38 |
| 2-Methylpropane                        | 2.76  | 2.35  | 0.41  |
| 2-Methylpropanoic acid                 | 0.6   | 0.87  | -0.27 |
| 2-Methylpropenoic acid                 | 0.93  | 0.78  | 0.15  |
| 2-Methylpropylamine                    | 0.73  | 0.57  | 0.16  |
| 2-Methylpyrazine                       | 0.23  | -0.09 | 0.32  |
| 2-Methylquinoline                      | 2.59  | 2.66  | -0.07 |
| 2-Methylquinoxaline                    | 1.61  | 1.71  | -0.10 |
| 2-Naphthol                             | 2.7   | 2.83  | -0.13 |
| 2-Naphthoxyacetic acid                 | 2.53  | 2.47  | 0.06  |
| 2-Naphthylamine                        | 2.28  | 2.32  | -0.04 |
| 2-Naphthylisothiocyanate               | 4.34  | 4.18  | 0.16  |
| 2-Nitroaniline                         | 1.85  | 1.7   | 0.15  |
| 2-Nitrobenzaldehyde                    | 1.74  | 1.44  | 0.30  |
| 2-Nitrobenzenesulfonamide              | 0.34  | 0.84  | -0.50 |
| 2-Nitrobenzoic acid                    | 1.47  | 1.83  | -0.36 |
| 2-Nitroethanol                         | -0.42 | -0.92 | 0.50  |
| 2-Nitroethylbenzene                    | 2.08  | 2.15  | -0.07 |
| 2-Nitro-m-xylene                       | 2.95  | 2.78  | 0.17  |
| 2-Nitrophenol                          | 1.77  | 2.21  | -0.44 |
| 2-Nitrophenoxyacetic acid              | 1.22  | 1.34  | -0.12 |
| 2-Nitrophenyl N-methylcarbamate        | 1.02  | 1.32  | -0.30 |
| 2-Nitrophenylacetate                   | 1.55  | 2.05  | -0.50 |
| 2-Nitropropane                         | 0.93  | 0.81  | 0.12  |
| 2-Nitroresorcinol                      | 1.36  | 2.32  | -0.96 |
| 2-Nitrotoluene                         | 2.3   | 2.44  | -0.14 |
| 2-Nonanone                             | 3.14  | 3.05  | 0.09  |
| 2-Nonyn-1-ol                           | 3.01  | 2.54  | 0.47  |
| 2-Nonynoic acid                        | 2.65  | 2.75  | -0.10 |
| 2-n-Propylphenol                       | 2.93  | 3.05  | -0.12 |
| 2-Octanol                              | 2.9   | 2.61  | 0.29  |
| 2-Octanone                             | 2.37  | 2.61  | -0.24 |
| 2-Octen-1-ol                           | 2.45  | 2.18  | 0.27  |
| 2-Octyn-1-ol                           | 2.48  | 2.1   | 0.38  |
| 2-Octynoic acid                        | 2.12  | 2.31  | -0.19 |

|                                       |       |       |       |
|---------------------------------------|-------|-------|-------|
| 2-Penten-4-yn-1-ol                    | -0.01 | 0.08  | -0.09 |
| 2-Pentyn-1-ol                         | 0.89  | 0.78  | 0.11  |
| 2-Phenethylisothiocyanate             | 3.74  | 3.97  | -0.23 |
| 2-Phenoxyanisole                      | 2.92  | 3.79  | -0.87 |
| 2-Phenoxybenzoic acid                 | 2.84  | 3.59  | -0.75 |
| 2-Phenoxyethanol                      | 1.16  | 1.26  | -0.10 |
| 2-Phenylaniline                       | 3.34  | 2.96  | 0.38  |
| 2-Phenylethylamine                    | 1.41  | 1.59  | -0.18 |
| 2-Phenylimidazole                     | 1.88  | 1.19  | 0.69  |
| 2-Phenylphenoxyacetic acid            | 2.83  | 3.11  | -0.28 |
| 2-Phenylpyridine                      | 2.63  | 2.56  | 0.07  |
| 2-Phenylquinoline                     | 3.9   | 3.96  | -0.06 |
| 2-Phenylthiophene                     | 3.74  | 3.62  | 0.12  |
| 2-Picoline                            | 1.11  | 1.26  | -0.15 |
| 2-Propanol                            | 0.26  | 0.41  | -0.15 |
| 2-Propylpentanoic acid                | 2.75  | 2.63  | 0.12  |
| 2-Propyn-1-ol                         | -0.38 | -0.4  | 0.02  |
| 2-Pyridinecarbonitrile                | 0.4   | 0.29  | 0.11  |
| 2-Pyridinemethanamine                 | -0.21 | -0.16 | -0.05 |
| 2-Pyridinemethanol                    | 0.06  | -0.07 | 0.13  |
| 2-Pyridinepropanol                    | 0.58  | 0.81  | -0.23 |
| 2-Pyridone                            | -0.58 | 0.21  | -0.79 |
| 2-Pyrimidone                          | -1.62 | -2.21 | 0.59  |
| 2-Pyrrolidone                         | 0.46  | -0.01 | 0.47  |
| 2-s-Butylphenol                       | 3.27  | 3.33  | -0.06 |
| 2-s-Butylphenoxyacetic acid           | 3.32  | 2.97  | 0.35  |
| 2-s-Butylphenyl N,N-dimethylcarbamate | 3.31  | 3.29  | 0.02  |
| 2-s-Butylphenyl N-methylcarbamate     | 2.78  | 2.95  | -0.17 |
| 2-t-Butylphenol                       | 3.31  | 3.25  | 0.06  |
| 2-t-Butylphenoxyacetic acid           | 3.33  | 2.89  | 0.44  |
| 2-t-Butylphenyl N-methylcarbamate     | 2.65  | 2.87  | -0.22 |
| 2-Thiocresol                          | 3.52  | 2.54  | 0.98  |
| 2-Thiouracil                          | -0.28 | -0.63 | 0.35  |
| 2-Tolunitrile                         | 2.21  | 1.94  | 0.27  |
| 2-Tolyl N-methylcarbamate             | 1.46  | 1.79  | -0.33 |
| 2-Tridecanone                         | 5.08  | 4.81  | 0.27  |
| 2-Tridecyn-1-ol                       | 5.13  | 4.3   | 0.83  |
| 2-Trifluoromethylbenzimidazole        | 2.67  | 2.42  | 0.25  |
| 2-Trifluoromethylphenol               | 2.8   | 2.76  | 0.04  |
| 2-Undecanone                          | 4.09  | 3.93  | 0.16  |
| 3-(1-Methyl-2-pyrrolidinyl)pyridine   | 1.17  | 1.24  | -0.07 |
| 3-(2-pyridyl)propionamide             | -0.27 | 0.13  | -0.40 |

|                                               |       |       |       |
|-----------------------------------------------|-------|-------|-------|
| 3-(2-Pyridyl)propylamine                      | 0.49  | 0.72  | -0.23 |
| 3-(3-pyridyl)propionamide                     | -0.26 | 0.09  | -0.35 |
| 3-(3-Pyridyl)propylamine                      | 0.44  | 0.68  | -0.24 |
| 3-(4-Pyridyl)propanol                         | 0.58  | 0.77  | -0.19 |
| 3-(4-pyridyl)propionamide                     | -0.25 | 0.09  | -0.34 |
| 3-(4-Pyridyl)propylamine                      | 0.4   | 0.68  | -0.28 |
| 3-(Dimethylamino)benzamide                    | 0.95  | 0.25  | 0.70  |
| 3-(Dimethylamino)phenyl N-methylcarbamate     | 1.43  | 1.14  | 0.29  |
| 3-(Methylthio)aniline                         | 1.45  | 1.79  | -0.34 |
| 3-(Trifluoromethylsulfonyl)phenoxyacetic acid | 2.19  | 1.84  | 0.35  |
| 3-(Trifluoromethylthio)phenoxyacetic acid     | 2.86  | 3.32  | -0.46 |
| 3,3',4,4',5,5'-Hexachlorobiphenyl             | 7.41  | 7.05  | 0.36  |
| 3,3',4,4',5-Pentabromodiphenyl ether          | 6.97  | 7.11  | -0.14 |
| 3,3',4,4',5-Pentachlorodiphenyl ether         | 6.88  | 6.51  | 0.37  |
| 3,3',4,4'-Tetrabromodiphenyl ether            | 6.96  | 6.46  | 0.50  |
| 3,3',4,4'-Tetrachlorobiphenyl                 | 6.63  | 5.99  | 0.64  |
| 3,3',4,4'-Tetrachlorodiphenyl ether           | 6.36  | 5.98  | 0.38  |
| 3,3',4-Tribromodiphenyl ether                 | 5.58  | 5.81  | -0.23 |
| 3,3',5,5'-Tetrachlorobiphenyl                 | 6.48  | 5.99  | 0.49  |
| 3,3',5-Trichlorobiphenyl                      | 5.81  | 5.46  | 0.35  |
| 3,3'-Dichlorobenzidine                        | 3.51  | 3.11  | 0.40  |
| 3,3'-Dichlorobiphenyl                         | 5.3   | 4.93  | 0.37  |
| 3,3-Dimethyl-2-butanol                        | 1.48  | 1.49  | -0.01 |
| 3,3-Dimethylbutyraldehyde                     | 1.63  | 1.79  | -0.16 |
| 3,3-Dimethylglutaric acid                     | 0.16  | 0.84  | -0.68 |
| 3,4,4'-Tribromodiphenyl ether                 | 5.58  | 5.81  | -0.23 |
| 3,4,4'-Trichlorobiphenyl                      | 5.78  | 5.46  | 0.32  |
| 3,4,5,6-Tetrachloroguaiacol                   | 4.42  | 3.88  | 0.54  |
| 3,4,5-Trichlorocatechol                       | 3.75  | 3.02  | 0.73  |
| 3,4,5-Trichloroguaiacol                       | 3.77  | 3.35  | 0.42  |
| 3,4,5-Trichloroveratrole                      | 4.01  | 3.68  | 0.33  |
| 3,4,5-Trimethylphenol                         | 2.87  | 2.85  | 0.02  |
| 3,4-Diaminobenzoic acid                       | -0.7  | -0.37 | -0.33 |
| 3,4-Diaminofurazan                            | 0.02  | -0.26 | 0.28  |
| 3,4'-Dibromodiphenyl ether                    | 5.03  | 5.16  | -0.13 |
| 3,4-Dibromodiphenyl ether                     | 5.03  | 5.16  | -0.13 |
| 3,4-Dibromohexane                             | 3.85  | 3.77  | 0.08  |
| 3,4-Dichloroaniline                           | 2.69  | 2.38  | 0.31  |
| 3,4-Dichlorobenzenesulfonamide                | 1.44  | 1.52  | -0.08 |
| 3,4'-Dichlorobiphenyl                         | 5.15  | 4.93  | 0.22  |
| 3,4-Dichlorobiphenyl                          | 5.29  | 4.93  | 0.36  |
| 3,4-Dichloronitrobenzene                      | 3.12  | 3.16  | -0.04 |

|                                        |      |      |       |
|----------------------------------------|------|------|-------|
| 3,4-Dichlorophenol                     | 3.33 | 2.89 | 0.44  |
| 3,4-Dichlorophenoxyacetic acid         | 2.81 | 2.53 | 0.28  |
| 3,4-Dichlorophenyl N-methylcarbamate   | 2.8  | 2.51 | 0.29  |
| 3,4-Dichlorotoluene                    | 3.95 | 3.63 | 0.32  |
| 3,4-Dihydro-2H-1-benzopyran-2-one      | 1.67 | 2.72 | -1.05 |
| 3,4-Dimethoxyamphetamine               | 1    | 1.88 | -0.88 |
| 3,4-Dimethylphenyl N-methylcarbamate   | 2.09 | 2.13 | -0.04 |
| 3,4-Dimethylthiophenol                 | 3.62 | 2.88 | 0.74  |
| 3,4-Diphenyl-1,2,5-oxadiazole          | 3.84 | 4    | -0.16 |
| 3,4-Xylenol                            | 2.23 | 2.51 | -0.28 |
| 3,4-Xylidine                           | 1.86 | 2    | -0.14 |
| 3,5-Dibromo-4-hydroxybenzonitrile      | 2.6  | 2.5  | 0.10  |
| 3,5-Dichloroaniline                    | 2.9  | 2.38 | 0.52  |
| 3,5-Dichlorobiphenyl                   | 5.41 | 4.93 | 0.48  |
| 3,5-Dichloronitrobenzene               | 3.09 | 3.16 | -0.07 |
| 3,5-Dichlorophenol                     | 3.61 | 2.89 | 0.72  |
| 3,5-Dichlorophenyl N-methylcarbamate   | 3.03 | 2.51 | 0.52  |
| 3,5-Dichloropyridine                   | 2.56 | 1.94 | 0.62  |
| 3,5-Dichlorothiophenol                 | 2.43 | 3.26 | -0.83 |
| 3,5-Diethyl-4-hydroxyacetanilide       | 2.36 | 2.64 | -0.28 |
| 3,5-Diiodosalicylic acid               | 4.56 | 3.58 | 0.98  |
| 3,5-Dimethyl-4-hydroxyacetanilide      | 1.6  | 1.76 | -0.16 |
| 3,5-Dimethyl-N-nitrosopiperidine       | 1.53 | 1.36 | 0.17  |
| 3,5-Dinitro-4-methylbenzamide          | 0.68 | 0.64 | 0.04  |
| 3,5-Dinitrophenol                      | 2.32 | 1.57 | 0.75  |
| 3,5-Dipropyl-4-hydroxyacetanilide      | 3.16 | 3.52 | -0.36 |
| 3,5-Dithiaheptane                      | 2.64 | 2.53 | 0.11  |
| 3,5-Heptanedione                       | 0.6  | 0.87 | -0.27 |
| 3,5-Xylenol                            | 2.35 | 2.51 | -0.16 |
| 3,6-Acridinediamine                    | 1.4  | 1.86 | -0.46 |
| 3,6-Dichlorodibenzofuran               | 5.44 | 5.06 | 0.38  |
| 3,6-Dichloropicolinic acid             | 1.07 | 1.32 | -0.25 |
| 3,beta-Dinitrostyrene                  | 1.82 | 2.08 | -0.26 |
| 3-Acetamido-4-chlorophenoxyacetic acid | 0.67 | 1.25 | -0.58 |
| 3-Acetamidophenol                      | 0.73 | 1.08 | -0.35 |
| 3-Acetamidophenoxyacetic acid          | 0.48 | 0.72 | -0.24 |
| 3-Acetaminpyridine                     | 0.41 | 0.13 | 0.28  |
| 3-Acetylaminoquinoline                 | 1.92 | 1.53 | 0.39  |
| 3-Acetylphenoxyacetic acid             | 0.98 | 0.95 | 0.03  |
| 3-Acetylphenyl N,N-dimethylcarbamate   | 1.18 | 1.27 | -0.09 |
| 3-Acetylphenyl N-methylcarbamate       | 0.9  | 0.93 | -0.03 |
| 3-Acetylpyridine                       | 0.43 | 0.36 | 0.07  |

|                                    |       |       |       |
|------------------------------------|-------|-------|-------|
| 3-Allyloxy-4-aminobenzoic acid     | 0.42  | 1.12  | -0.70 |
| 3-Amino-1,2-propanediol,           | -2.12 | -1.57 | -0.55 |
| 3-Amino-2,2-dimethyl-1-propanol    | -0.79 | -0.4  | -0.39 |
| 3-Amino-4-chlorophenoxyacetic acid | 1.16  | 1.09  | 0.07  |
| 3-Amino-4-phenyl-1,2,5-oxadiazole  | 1.81  | 1.87  | -0.06 |
| 3-Aminoacridine                    | 2.19  | 2.77  | -0.58 |
| 3-Aminobenzamide                   | 0.33  | -0.35 | 0.68  |
| 3-Aminobenzenesulfonamide          | -1.2  | -0.45 | -0.75 |
| 3-Aminobenzylalcohol               | -0.55 | 0.33  | -0.88 |
| 3-Aminopentane                     | 1.23  | 1.16  | 0.07  |
| 3-Aminophenol                      | 0.17  | 0.92  | -0.75 |
| 3-Aminopyridine                    | 0.11  | -0.03 | 0.14  |
| 3-Aminoquinoline                   | 1.63  | 1.37  | 0.26  |
| 3-Benzamidophenoxyacetic acid      | 1.99  | 2.02  | -0.03 |
| 3-Bromo-1-propanol                 | 0.15  | 0.52  | -0.37 |
| 3-Bromo-2,2-dimethyl-1-propanol    | 0.95  | 1.16  | -0.21 |
| 3-Bromo-4-chlorophenoxyacetic acid | 2.75  | 2.65  | 0.10  |
| 3-Bromoaniline                     | 2.1   | 1.97  | 0.13  |
| 3-Bromobenzamide                   | 1.65  | 1.21  | 0.44  |
| 3-Bromobenzoic acid                | 2.87  | 2.1   | 0.77  |
| 3-Bromochlorobenzene               | 3.7   | 3.41  | 0.29  |
| 3-Bromonitrobenzene                | 2.64  | 2.75  | -0.11 |
| 3-Bromophenol                      | 2.63  | 2.48  | 0.15  |
| 3-Bromophenoxyacetic acid          | 2.22  | 2.12  | 0.10  |
| 3-Bromophenyl N-methylcarbamate    | 2.25  | 2.1   | 0.15  |
| 3-Bromophenylacetic acid           | 2.37  | 2.54  | -0.17 |
| 3-Bromopropionic acid              | 0.5   | 0.73  | -0.23 |
| 3-Bromopyridine                    | 1.6   | 1.53  | 0.07  |
| 3-Bromoquinoline                   | 2.91  | 2.93  | -0.02 |
| 3-Bromothiophenol                  | 2.48  | 2.85  | -0.37 |
| 3-Bromotoluene                     | 3.43  | 3.22  | 0.21  |
| 3-Buten-2-ol                       | 0.12  | 0.63  | -0.51 |
| 3-Butenoic acid                    | 0.34  | 0.81  | -0.47 |
| 3-Butoxyphenyl N-methylcarbamate   | 2.96  | 2.69  | 0.27  |
| 3-Butylphenoxyacetic acid          | 3.18  | 3.13  | 0.05  |
| 3-Butyn-2-ol                       | 0.14  | 0.07  | 0.07  |
| 3-Carbamidomethylpyridine          | -0.71 | -0.35 | -0.36 |
| 3-Carboxyphenol                    | 1.5   | 1.05  | 0.45  |
| 3-Carboxyphenoxyacetic acid        | 1.11  | 0.54  | 0.57  |
| 3-Carboxyphenylacetic acid         | 1.14  | 0.96  | 0.18  |
| 3-Chloro-1-propanol                | 0.5   | 0.44  | 0.06  |
| 3-Chloro-2,2-dimethyl-1-propanol   | 0.81  | 1.08  | -0.27 |

|                                     |       |       |       |
|-------------------------------------|-------|-------|-------|
| 3-Chloro-2,4-pentanedione           | 0.05  | 0.24  | -0.19 |
| 3-Chloro-2-butanone                 | 0.43  | 1.1   | -0.67 |
| 3-Chloro-5-fluorophenoxyacetic acid | 2.2   | 2.02  | 0.18  |
| 3-Chloroaniline                     | 1.88  | 1.85  | 0.03  |
| 3-Chloroanisole                     | 2.6   | 2.69  | -0.09 |
| 3-Chlorobenzamide                   | 1.51  | 1.09  | 0.42  |
| 3-Chlorobenzenesulfonamide          | 1.29  | 0.99  | 0.30  |
| 3-Chlorobenzoic acid                | 2.68  | 1.98  | 0.70  |
| 3-Chlorobenzylalcohol               | 1.94  | 1.77  | 0.17  |
| 3-Chloro-beta-nitrostyrene          | 2.57  | 2.74  | -0.17 |
| 3-Chlorobiphenyl                    | 4.58  | 4.4   | 0.18  |
| 3-Chlorodibenzofuran                | 4.35  | 4.53  | -0.18 |
| 3-Chloronitrobenzene                | 2.46  | 2.63  | -0.17 |
| 3-Chlorophenol                      | 2.5   | 2.36  | 0.14  |
| 3-Chlorophenoxyacetic acid          | 2.03  | 2     | 0.03  |
| 3-Chlorophenyl N-methylcarbamate    | 2.03  | 1.98  | 0.05  |
| 3-Chlorophenylacetate               | 2.32  | 2.71  | -0.39 |
| 3-Chlorophenylacetic acid           | 2.09  | 2.42  | -0.33 |
| 3-Chloropropionic acid              | 0.41  | 0.65  | -0.24 |
| 3-Chloropropionitrile               | 0.18  | 0.8   | -0.62 |
| 3-Chloropyridine                    | 1.33  | 1.41  | -0.08 |
| 3-Chlorothiophenol                  | 2.47  | 2.73  | -0.26 |
| 3-Chlorotoluene                     | 3.28  | 3.1   | 0.18  |
| 3-Cyanobenzamide                    | 0.52  | -0.07 | 0.59  |
| 3-Cyanobenzoic acid                 | 1.48  | 0.82  | 0.66  |
| 3-Cyanophenol                       | 1.7   | 1.2   | 0.50  |
| 3-Cyanophenoxyacetic acid           | 0.95  | 0.84  | 0.11  |
| 3-Cyanophenyl N-methylcarbamate     | 0.97  | 0.82  | 0.15  |
| 3-Cyanophenylacetic acid            | 1.18  | 1.26  | -0.08 |
| 3-Decanone                          | 3.49  | 3.49  | 0.00  |
| 3-Decyn-1-ol                        | 2.99  | 2.98  | 0.01  |
| 3-Dimethylaminophenol               | 1.57  | 1.52  | 0.05  |
| 3-Ethoxyphenol                      | 1.98  | 2.19  | -0.21 |
| 3-Ethoxyphenyl N-methylcarbamate    | 1.75  | 1.81  | -0.06 |
| 3-Ethoxypropylamine                 | -0.49 | 0.15  | -0.64 |
| 3-Ethyl-1-hydroxyurea               | -0.76 | -0.91 | 0.15  |
| 3-Ethyl-4-hydroxyacetanilide        | 1.79  | 1.86  | -0.07 |
| 3-Ethylphenol                       | 2.5   | 2.61  | -0.11 |
| 3-Ethylphenoxyacetic acid           | 2.25  | 2.25  | 0.00  |
| 3-Ethylphenyl N-methylcarbamate     | 2.2   | 2.23  | -0.03 |
| 3-Ethyltoluene                      | 3.88  | 3.53  | 0.35  |
| 3-Fluoro-5-iodophenoxyacetic acid   | 2.42  | 2.5   | -0.08 |

|                                           |       |       |       |
|-------------------------------------------|-------|-------|-------|
| 3-Fluoroaniline                           | 1.3   | 1.34  | -0.04 |
| 3-Fluorobenzalmalonodiamide               | 0.1   | -0.54 | 0.64  |
| 3-Fluorobenzamide                         | 0.91  | 0.58  | 0.33  |
| 3-Fluorobenzoic acid                      | 2.15  | 1.47  | 0.68  |
| 3-Fluorobenzyl chloride                   | 2.77  | 2.65  | 0.12  |
| 3-Fluorophenol                            | 1.93  | 1.85  | 0.08  |
| 3-Fluorophenoxyacetic acid                | 1.48  | 1.49  | -0.01 |
| 3-Fluorophenyl N-methylcarbamate          | 1.48  | 1.47  | 0.01  |
| 3-Fluorophenylacetate                     | 1.74  | 2.2   | -0.46 |
| 3-Fluorophenylacetic acid                 | 1.65  | 1.91  | -0.26 |
| 3-Fluorothiophenol                        | 2.12  | 2.22  | -0.10 |
| 3-Heptanol                                | 2.24  | 2.17  | 0.07  |
| 3-Heptanone                               | 1.73  | 2.17  | -0.44 |
| 3-Heptyn-1-ol                             | 1.4   | 1.66  | -0.26 |
| 3-Hexyn-1-ol                              | 0.87  | 1.22  | -0.35 |
| 3-Hexyn-2-ol                              | 1.2   | 1.25  | -0.05 |
| 3-Hexyne-2,5-diol                         | -0.1  | 0.21  | -0.31 |
| 3-Hydroxyacetophenone                     | 1.39  | 1.31  | 0.08  |
| 3-Hydroxybenzamide                        | 0.39  | 0.16  | 0.23  |
| 3-Hydroxybenzylalcohol                    | 0.49  | 0.84  | -0.35 |
| 3-Hydroxy-beta-nitrostyrene               | 2.07  | 1.81  | 0.26  |
| 3-Hydroxybiphenyl                         | 3.23  | 3.47  | -0.24 |
| 3-Hydroxy-N-Nitrosopiperidine             | -0.47 | -0.5  | 0.03  |
| 3-Hydroxyphenoxyacetic acid               | 0.76  | 1.07  | -0.31 |
| 3-Hydroxyphenylacetate                    | 1.23  | 1.78  | -0.55 |
| 3-Hydroxyphenylacetic acid                | 0.85  | 1.49  | -0.64 |
| 3-Hydroxypicolinic acid                   | -1.27 | -1.14 | -0.13 |
| 3-Iodoaniline                             | 2.86  | 2.33  | 0.53  |
| 3-Iodobenzoic acid                        | 3.13  | 2.46  | 0.67  |
| 3-Iodonitrobenzene                        | 2.94  | 3.11  | -0.17 |
| 3-Iodophenol                              | 2.93  | 2.84  | 0.09  |
| 3-Iodophenoxyacetic acid                  | 2.62  | 2.48  | 0.14  |
| 3-Iodophenyl N-methylcarbamate            | 2.52  | 2.46  | 0.06  |
| 3-Isopropoxyphenyl N-methylcarbamate      | 1.96  | 2.28  | -0.32 |
| 3-Isopropyl-4-hydroxyacetanilide          | 2.2   | 2.14  | 0.06  |
| 3-Isopropylphenoxyacetic acid             | 2.59  | 2.53  | 0.06  |
| 3-Methoxy-4-hydroxybenzaldehyde           | 1.21  | 1.1   | 0.11  |
| 3-Methoxybenzalmalonodiamide              | 0.01  | -0.12 | 0.13  |
| 3-Methoxybenzamide                        | 0.94  | 0.49  | 0.45  |
| 3-Methoxy-beta-nitrostyrene               | 2.37  | 2.14  | 0.23  |
| 3-Methoxycarbonylphenyl N-methylcarbamate | 1.42  | 1     | 0.42  |
| 3-Methoxyformanilide                      | 1.25  | 1.2   | 0.05  |

|                                               |       |       |       |
|-----------------------------------------------|-------|-------|-------|
| 3-Methoxyphenol                               | 1.58  | 1.76  | -0.18 |
| 3-Methoxyphenoxyacetic acid                   | 1.38  | 1.4   | -0.02 |
| 3-Methoxyphenyl N,N-dimethylcarbamate         | 1.6   | 1.72  | -0.12 |
| 3-Methoxyphenyl N-methylcarbamate             | 1.3   | 1.38  | -0.08 |
| 3-Methoxyphenylacetic acid                    | 1.5   | 1.82  | -0.32 |
| 3-Methoxysalicylaldehyde                      | 1.37  | 1.61  | -0.24 |
| 3-Methoxythiophenol                           | 2.93  | 2.13  | 0.80  |
| 3-Methoxytoluene                              | 2.66  | 2.5   | 0.16  |
| 3-Methyl-2-butanol                            | 1.28  | 1.13  | 0.15  |
| 3-Methyl-2-butanone                           | 0.84  | 1.13  | -0.29 |
| 3-Methyl-4-hydroxyacetanilide                 | 1.28  | 1.42  | -0.14 |
| 3-Methyl-4-methylthiophenyl N-methylcarbamate | 2.47  | 2.26  | 0.21  |
| 3-Methyl-4-nitroquinoline-1-oxide             | 1.06  | 1.1   | -0.04 |
| 3-Methyl-4-phenyl-1,2,5-oxadiazole            | 2.59  | 2.7   | -0.11 |
| 3-Methylamino-1,2-propanediol                 | -1.82 | -1.67 | -0.15 |
| 3-Methylbenzalmalonodiamide                   | 0.4   | 0.29  | 0.11  |
| 3-Methylbenzenesulfonamide                    | 0.85  | 0.8   | 0.05  |
| 3-Methylbenzoic acid                          | 2.37  | 1.79  | 0.58  |
| 3-Methylbenzylalcohol                         | 1.6   | 1.58  | 0.02  |
| 3-Methylbutanoic acid                         | 1.16  | 1.31  | -0.15 |
| 3-Methylcholanthrene                          | 6.42  | 6.87  | -0.45 |
| 3-Methyl-N-nitrosopiperidine                  | 0.99  | 1.08  | -0.09 |
| 3-Methylpentane                               | 3.6   | 3.41  | 0.19  |
| 3-Methylphenanthrene                          | 5.15  | 4.87  | 0.28  |
| 3-Methylphenoxyacetic acid                    | 1.78  | 1.81  | -0.03 |
| 3-Methylpyridine                              | 1.2   | 1.22  | -0.02 |
| 3-Methylquinazolin-4-one                      | 0.69  | 0.39  | 0.30  |
| 3-Methylstyrene                               | 3.35  | 3.31  | 0.04  |
| 3-Methylthiophenoxyacetic acid                | 1.9   | 1.94  | -0.04 |
| 3-Methylvaleric acid                          | 1.75  | 1.75  | 0.00  |
| 3-Nitroacetophenone                           | 1.42  | 1.58  | -0.16 |
| 3-Nitroaniline                                | 1.37  | 1.19  | 0.18  |
| 3-Nitroanisole                                | 2.16  | 2.03  | 0.13  |
| 3-Nitrobenzaldehyde                           | 1.47  | 1.44  | 0.03  |
| 3-Nitrobenzamide                              | 0.77  | 0.43  | 0.34  |
| 3-Nitrobenzenesulfonamide                     | 0.55  | 0.33  | 0.22  |
| 3-Nitrobenzoic acid                           | 1.89  | 1.32  | 0.57  |
| 3-Nitrobenzonitrile                           | 1.17  | 1.47  | -0.30 |
| 3-Nitrobenzylalcohol                          | 1.21  | 1.11  | 0.10  |
| 3-Nitrophenol                                 | 2     | 1.7   | 0.30  |
| 3-Nitrophenoxyacetic acid                     | 1.37  | 1.34  | 0.03  |
| 3-Nitrophenyl N-methylcarbamate               | 1.39  | 1.32  | 0.07  |

|                                     |       |       |       |
|-------------------------------------|-------|-------|-------|
| 3-Nitrophenylacetate                | 1.82  | 2.05  | -0.23 |
| 3-Nitrophenylacetic acid            | 1.45  | 1.76  | -0.31 |
| 3-Nitropyridine                     | 0.6   | 0.75  | -0.15 |
| 3-Nitroquinoline                    | 1.97  | 2.15  | -0.18 |
| 3-Nitroquinoline-1-oxide            | 0.56  | 0.76  | -0.20 |
| 3-Nitrotoluene                      | 2.45  | 2.44  | 0.01  |
| 3-Nonyn-1-ol                        | 2.46  | 2.54  | -0.08 |
| 3-Octyn-1-ol                        | 1.93  | 2.1   | -0.17 |
| 3-p-Anisoyl-3-bromoacrylic acid     | 1.74  | 1.7   | 0.04  |
| 3-Pentanol                          | 1.21  | 1.29  | -0.08 |
| 3-Penten-2-ol                       | 0.65  | 0.89  | -0.24 |
| 3-Pentyn-1-ol                       | 0.34  | 0.78  | -0.44 |
| 3-Phenyl-1-iodopropane              | 3.9   | 4.26  | -0.36 |
| 3-Phenylphenoxyacetic acid          | 3.18  | 3.11  | 0.07  |
| 3-Phenylpropanoic acid              | 1.84  | 2.33  | -0.49 |
| 3-Phenylpropene                     | 3.23  | 3.41  | -0.18 |
| 3-Phenylpropionamide                | 1.03  | 1.44  | -0.41 |
| 3-Phenylpropylamine                 | 1.83  | 2.03  | -0.20 |
| 3-Phenylpropyldimethylamine         | 2.73  | 2.85  | -0.12 |
| 3-Phenylpropylfluoride              | 2.95  | 2.89  | 0.06  |
| 3-Propionylphenyl N-methylcarbamate | 1.49  | 1.37  | 0.12  |
| 3-Propylphenoxyacetic acid          | 2.71  | 2.69  | 0.02  |
| 3-Pyridinecarbonitrile              | 0.36  | 0.25  | 0.11  |
| 3-Pyridinemethanamine               | -0.32 | -0.2  | -0.12 |
| 3-Pyridinemethanol                  | -0.02 | -0.11 | 0.09  |
| 3-Pyridinepropanol                  | 0.6   | 0.77  | -0.17 |
| 3-t-Butyl-4-hydroxyacetanilide      | 2.85  | 2.5   | 0.35  |
| 3-t-Butylphenyl N-methylcarbamate   | 2.93  | 2.87  | 0.06  |
| 3-Tetradecyn-1-ol                   | 5.11  | 4.74  | 0.37  |
| 3-Thiocresol                        | 3.13  | 2.54  | 0.59  |
| 3-Thiopropionic acid                | 0.43  | 0.64  | -0.21 |
| 3-Trifluoromethylbenzoic acid       | 2.95  | 2.38  | 0.57  |
| 3-Trifluoromethylphenol             | 2.95  | 2.76  | 0.19  |
| 3-Trifluoromethylphenoxyacetic acid | 2.36  | 2.4   | -0.04 |
| 3-Trifluoromethylphenylacetic acid  | 2.62  | 2.82  | -0.20 |
| 3-Ureidophenoxyacetic acid          | 0.26  | 0.16  | 0.10  |
| 4-(2,4-Dichlorophenoxy)butyric acid | 3.53  | 3.41  | 0.12  |
| 4-(2-Pyridyl)butanol                | 0.86  | 1.25  | -0.39 |
| 4-(2-Pyridyl)butylamine             | 0.86  | 1.16  | -0.30 |
| 4-(2-Pyridyl)pentamide              | -0.01 | 0.85  | -0.86 |
| 4(3H)-Pyridmidone                   | -1.38 | -1.05 | -0.33 |
| 4-(3-Pyridyl)butanamide             | -0.08 | 0.53  | -0.61 |

|                                                |       |       |       |
|------------------------------------------------|-------|-------|-------|
| 4-(3-Pyridyl)butanol                           | 0.92  | 1.21  | -0.29 |
| 4-(3-Pyridyl)butylamine                        | 0.88  | 1.12  | -0.24 |
| 4-(4-Pyridyl)butanamide                        | -0.09 | 0.53  | -0.62 |
| 4-(4-Pyridyl)butanol                           | 0.9   | 1.21  | -0.31 |
| 4-(4-Pyridyl)butylamine                        | 0.86  | 1.12  | -0.26 |
| 4-(Acetylamino)benzamide                       | 0.01  | -0.19 | 0.20  |
| 4-(Acetylamino)benzoic acid                    | 1.31  | 0.7   | 0.61  |
| 4-(Dimethylamino)benzamide                     | 1.14  | 0.25  | 0.89  |
| 4-(Methylthio)benzoic acid                     | 2.74  | 1.92  | 0.82  |
| 4-(Methylthio)phenol                           | 1.78  | 2.3   | -0.52 |
| 4-(Methylthio)phenyl N-methylcarbamate         | 1.92  | 1.92  | 0.00  |
| 4,4'-Diaminodiphenyl sulfone                   | 0.97  | 1.07  | -0.10 |
| 4,4'-Dibromobiphenyl                           | 5.72  | 5.17  | 0.55  |
| 4,4'-Dibromodiphenyl ether                     | 5.03  | 5.16  | -0.13 |
| 4,4'-Dichlorobiphenyl                          | 5.58  | 4.93  | 0.65  |
| 4,4'-Diisothiocyanatobiphenyl                  | 5.5   | 5.77  | -0.27 |
| 4,4'-Dimethylbiphenyl                          | 5.09  | 4.83  | 0.26  |
| 4,5,6-Trichloro-2-trifluoromethylbenzimidazole | 4.08  | 4.01  | 0.07  |
| 4,5,6-Trichloroguaiacol                        | 3.72  | 3.35  | 0.37  |
| 4,5,7-Trichloro-2-trifluoromethylbenzimidazole | 3.78  | 4.01  | -0.23 |
| 4,5-Dibromo-1,2,3-triazole                     | 2.24  | 3.01  | -0.77 |
| 4,5-Dichloroguaiacol                           | 3.26  | 2.82  | 0.44  |
| 4,5-Dichloroveratrole                          | 3.11  | 3.15  | -0.04 |
| 4,5-Diethyldibenzothiophene                    | 5.98  | 6.07  | -0.09 |
| 4,5-Dimethyl-8-quinolinol                      | 2.71  | 2.56  | 0.15  |
| 4,5-Dimethyldibenzothiophene                   | 5.97  | 5.19  | 0.78  |
| 4,5-Dinitroquinoline-1-oxide                   | 0.95  | 0.63  | 0.32  |
| 4,6-Dichloro-2-trifluoromethylbenzimidazole    | 3.49  | 3.48  | 0.01  |
| 4,6-Dimethylpyrimidine                         | 0.62  | 0.61  | 0.01  |
| 4,6-Dinitro-o-cresol                           | 2.12  | 2.42  | -0.30 |
| 4,6-Dinitroquinoline-1-oxide                   | 0.9   | 0.63  | 0.27  |
| 4,7-Dichloro-2-trifluoromethylbenzimidazole    | 2.87  | 3.48  | -0.61 |
| 4,7-Phenanthroline                             | 2.05  | 2.33  | -0.28 |
| 4,beta-Dinitrostyrene                          | 1.89  | 2.08  | -0.19 |
| 4-Acetaminpyridine                             | 0.59  | 0.13  | 0.46  |
| 4-Acetyl-7-chloroquinoline                     | 2.62  | 2.29  | 0.33  |
| 4-Acetylanisole                                | 1.82  | 1.64  | 0.18  |
| 4-Acetylformanilide                            | 0.94  | 0.75  | 0.19  |
| 4-Acetylphenol                                 | 1.35  | 1.31  | 0.04  |
| 4-Acetylphenoxyacetic acid                     | 0.87  | 0.95  | -0.08 |
| 4-Acetylphenyl N-methylcarbamate               | 1.01  | 0.93  | 0.08  |
| 4-Acetylpyridine                               | 0.54  | 0.36  | 0.18  |

|                                                         |       |       |       |
|---------------------------------------------------------|-------|-------|-------|
| 4-Allyl-2-methoxyphenol                                 | 2.27  | 2.76  | -0.49 |
| 4-Amino-1-butanol                                       | -1.06 | -0.6  | -0.46 |
| 4-Amino-2-bromobenzoic acid                             | 0.66  | 1.19  | -0.53 |
| 4-Amino-2-butoxybenzoic acid                            | 1.24  | 2.29  | -1.05 |
| 4-Amino-2-chlorobenzoic acid                            | 0.5   | 1.07  | -0.57 |
| 4-Amino-2-ethoxybenzoic acid                            | 0.16  | 0.9   | -0.74 |
| 4-Amino-2-fluorobenzoic acid                            | 0.46  | 0.56  | -0.10 |
| 4-Amino-2-iodobenzoic acid                              | 0.82  | 1.55  | -0.73 |
| 4-Amino-2-isopentoxybenzoic acid                        | 1.47  | 2.57  | -1.10 |
| 4-Amino-2-methoxybenzoic acid                           | -0.38 | 0.47  | -0.85 |
| 4-Amino-2-methylbenzoic acid                            | 0.31  | 0.88  | -0.57 |
| 4-Amino-2-nitrobenzoic acid                             | 0.38  | 0.41  | -0.03 |
| 4-Amino-2-nitrophenol                                   | 0.96  | 1.3   | -0.34 |
| 4-Amino-2-pentoxybenzoic acid                           | 1.55  | 2.73  | -1.18 |
| 4-Amino-2-propoxybenzoic acid                           | 0.7   | 1.85  | -1.15 |
| 4-Amino-3,5,6-trichloro-2-pyridinecarboxylic acid       | 0.3   | 0.94  | -0.64 |
| 4-Amino-3-bromobenzoic acid                             | 1.4   | 1.19  | 0.21  |
| 4-Amino-3-chlorobenzoic acid                            | 1.52  | 1.07  | 0.45  |
| 4-Amino-3-fluorobenzoic acid                            | 0.58  | 0.56  | 0.02  |
| 4-Amino-3-hydroxybenzoic acid                           | -0.32 | 0.14  | -0.46 |
| 4-Amino-3-iodobenzoic acid                              | 1.53  | 1.55  | -0.02 |
| 4-Amino-3-methylbenzoic acid                            | 0.54  | 0.88  | -0.34 |
| 4-Amino-3-methylthio-6-propyl-1,2,4-triazine-5-one      | 1.01  | 1.28  | -0.27 |
| 4-Amino-3-morpholino-6-isopropyl-1,2,4-triazine-5-one   | 0.49  | 0.16  | 0.33  |
| 4-Amino-6-isopentyl-3-methylthio-1,2,4-triazin-5-one    | 1.85  | 2     | -0.15 |
| 4-Amino-6-isopropyl-3-isopropylthio-1,2,4-triazin-5-one | 2.06  | 1.79  | 0.27  |
| 4-Amino-6-isopropyl-3-propylthio-1,2,4-triazin-5-one    | 2.12  | 1.84  | 0.28  |
| 4-Amino-6-methyl-3-(methylthio)-1,2,4-triazin-5-one     | -0.16 | 0.4   | -0.56 |
| 4-Amino-6-phenyl-3-(methylthio)-1,2,4-triazin-5-one     | 1.66  | 1.7   | -0.04 |
| 4-Aminoacetanilide                                      | 0.08  | 0.57  | -0.49 |
| 4-Aminoacetophenone                                     | 0.41  | 0.8   | -0.39 |
| 4-Aminoacridine                                         | 3.26  | 2.77  | 0.49  |
| 4-Aminobenzamide                                        | 0.02  | -0.35 | 0.37  |
| 4-Aminobenzenesulfonamide                               | -0.78 | -0.45 | -0.33 |
| 4-aminodiphenyl ether                                   | 2.36  | 2.95  | -0.59 |
| 4-Aminophenol                                           | 0.04  | 0.92  | -0.88 |
| 4-Aminophenylacetate                                    | 0.45  | 1.27  | -0.82 |
| 4-Aminopyridine                                         | 0.28  | -0.03 | 0.31  |
| 4-Aminopyrimidine                                       | -0.25 | -0.22 | -0.03 |
| 4-Aminoquinoline                                        | 1.63  | 1.37  | 0.26  |
| 4-Aminoquinoline-1-oxide                                | 0.05  | -0.02 | 0.07  |
| 4-Aminosalicylic acid                                   | 0.87  | 0.65  | 0.22  |

|                                            |      |      |       |
|--------------------------------------------|------|------|-------|
| 4-Aminosalicylic acid 2-bromophenylester   | 3.74 | 3.33 | 0.41  |
| 4-Aminosalicylic acid 2-chlorophenylester  | 3.72 | 3.21 | 0.51  |
| 4-Aminosalicylic acid 2-fluorophenylester  | 3.29 | 2.7  | 0.59  |
| 4-Aminosalicylic acid 2-methoxyphenylester | 2.88 | 2.61 | 0.27  |
| 4-Aminosalicylic acid 2-tolylester         | 3.14 | 3.02 | 0.12  |
| 4-Aminosalicylic acid 3-bromophenylester   | 3.84 | 3.33 | 0.51  |
| 4-Aminosalicylic acid 3-chlorophenylester  | 3.9  | 3.21 | 0.69  |
| 4-Aminosalicylic acid 3-fluorophenylester  | 3.42 | 2.7  | 0.72  |
| 4-Aminosalicylic acid 3-methoxyphenylester | 3.25 | 2.61 | 0.64  |
| 4-Aminosalicylic acid 3-tolylester         | 3.64 | 3.02 | 0.62  |
| 4-Aminosalicylic acid 4-bromophenylester   | 3.46 | 3.33 | 0.13  |
| 4-Aminosalicylic acid 4-chlorophenylester  | 3.6  | 3.21 | 0.39  |
| 4-Aminosalicylic acid 4-fluorophenylester  | 3.27 | 2.7  | 0.57  |
| 4-Aminosalicylic acid 4-methoxyphenylester | 3.07 | 2.61 | 0.46  |
| 4-Aminosalicylic acid 4-tolylester         | 3.38 | 3.02 | 0.36  |
| 4-Aminothiophenol                          | 1.88 | 1.29 | 0.59  |
| 4-Benzoylphenol                            | 3.07 | 2.61 | 0.46  |
| 4-Benzoylpyridine                          | 1.98 | 1.66 | 0.32  |
| 4-Benzylphenylisothiocyanate               | 4.4  | 5.26 | -0.86 |
| 4-Biphenylisothiocyanate                   | 4.66 | 4.82 | -0.16 |
| 4-Bromo-1-butene                           | 2.53 | 2.07 | 0.46  |
| 4-Bromo-2,6-dimethylphenyl isocyanate      | 3.63 | 3.62 | 0.01  |
| 4-Bromo-3,5-dimethoxyphenethylamine        | 2.03 | 2.1  | -0.07 |
| 4-Bromoacetophenone                        | 2.43 | 2.36 | 0.07  |
| 4-Bromoaniline                             | 2.26 | 1.97 | 0.29  |
| 4-Bromobenzamide                           | 1.76 | 1.21 | 0.55  |
| 4-Bromobenzenesulfonamide                  | 1.36 | 1.11 | 0.25  |
| 4-Bromobenzoic acid                        | 2.86 | 2.1  | 0.76  |
| 4-Bromobiphenyl                            | 4.95 | 4.52 | 0.43  |
| 4-Bromobutyl acetate                       | 1.62 | 1.93 | -0.31 |
| 4-Bromobutyric acid                        | 0.68 | 1.17 | -0.49 |
| 4-Bromobutyronitrile                       | 0.52 | 1.32 | -0.80 |
| 4-Bromonitrobenzene                        | 2.55 | 2.75 | -0.20 |
| 4-Bromophenol                              | 2.43 | 2.48 | -0.05 |
| 4-Bromophenoxyacetic acid                  | 2.45 | 2.12 | 0.33  |
| 4-Bromophenyl N-methylcarbamate            | 2.17 | 2.1  | 0.07  |
| 4-Bromophenylacetic acid                   | 2.31 | 2.54 | -0.23 |
| 4-Bromophenylisothiocyanate                | 4.03 | 3.83 | 0.20  |
| 4-Bromopyridine                            | 1.54 | 1.53 | 0.01  |
| 4-Bromothiophenol                          | 2.72 | 2.85 | -0.13 |
| 4-Bromotoluene                             | 3.42 | 3.22 | 0.20  |
| 4-Butoxybenzamide                          | 2.48 | 1.8  | 0.68  |

|                                               |       |       |       |
|-----------------------------------------------|-------|-------|-------|
| 4-Butoxyphenol                                | 2.87  | 3.07  | -0.20 |
| 4-Butoxyphenyl N-methylcarbamate              | 2.86  | 2.69  | 0.17  |
| 4-Butylaniline                                | 3.18  | 2.98  | 0.20  |
| 4-Butylbenzenesulfonamide                     | 2.45  | 2.12  | 0.33  |
| 4-Carbamidomethylpyridine                     | -0.65 | -0.35 | -0.30 |
| 4-Carboxyphenol                               | 1.58  | 1.05  | 0.53  |
| 4-Carboxyphenylisothiocyanate                 | 3.52  | 2.4   | 1.12  |
| 4-Chloro-1-butanol                            | 0.85  | 0.88  | -0.03 |
| 4-Chloro-2,5-dimethylphenyl N-methylcarbamate | 2.95  | 2.66  | 0.29  |
| 4-Chloro-2-methylphenol                       | 2.78  | 2.7   | 0.08  |
| 4-Chloro-2-nitrotoluene                       | 3.05  | 2.97  | 0.08  |
| 4-Chloro-2-trifluoromethylbenzimidazole       | 2.93  | 2.95  | -0.02 |
| 4-Chloro-3-cyanophenoxyacetic acid            | 1.56  | 1.37  | 0.19  |
| 4-Chloro-3-iodophenoxyacetic acid             | 3.1   | 3.01  | 0.09  |
| 4-Chloro-3-nitrophenoxyacetic acid            | 1.85  | 1.87  | -0.02 |
| 4-Chloro-6-nitro-m-cresol                     | 2.93  | 3.08  | -0.15 |
| 4-Chloro-8-quinolinol                         | 2.67  | 2.41  | 0.26  |
| 4-Chloroacetanilide                           | 1.87  | 2.01  | -0.14 |
| 4-Chloroacetophenone                          | 2.35  | 2.24  | 0.11  |
| 4-Chloroaniline                               | 1.83  | 1.85  | -0.02 |
| 4-Chloroanisole                               | 2.78  | 2.69  | 0.09  |
| 4-Chlorobenzaldehyde                          | 2.13  | 2.1   | 0.03  |
| 4-Chlorobenzamide                             | 1.51  | 1.09  | 0.42  |
| 4-Chlorobenzenesulfonamide                    | 0.84  | 0.99  | -0.15 |
| 4-Chlorobenzoic acid                          | 2.65  | 1.98  | 0.67  |
| 4-Chlorobenzylalcohol                         | 1.96  | 1.77  | 0.19  |
| 4-Chloro-beta-nitrostyrene                    | 2.85  | 2.74  | 0.11  |
| 4-Chlorobiphenyl                              | 4.61  | 4.4   | 0.21  |
| 4-Chlorobutanoic acid                         | 0.54  | 1.09  | -0.55 |
| 4-Chlorobutyronitrile                         | 0.56  | 1.24  | -0.68 |
| 4-Chlorodiphenyl ether                        | 4.08  | 4.39  | -0.31 |
| 4-Chloro-m-cresol                             | 3.1   | 2.7   | 0.40  |
| 4-Chloronitrobenzene                          | 2.39  | 2.63  | -0.24 |
| 4-Chlorophenol                                | 2.39  | 2.36  | 0.03  |
| 4-Chlorophenoxyacetic acid                    | 1.99  | 2     | -0.01 |
| 4-Chlorophenylacetic acid                     | 2.12  | 2.42  | -0.30 |
| 4-Chloroquinoline-1-oxide                     | 1.08  | 1.42  | -0.34 |
| 4-Chlorothiophenol                            | 2.66  | 2.73  | -0.07 |
| 4-Chlorotoluene                               | 3.33  | 3.1   | 0.23  |
| 4-Cumylphenyl diphenyl phosphate              | 6.1   | 6.88  | -0.78 |
| 4-Cyano-2-methylpyridine                      | 0.81  | 0.63  | 0.18  |
| 4-Cyanobenzamide                              | 0.48  | -0.07 | 0.55  |

|                                          |      |       |       |
|------------------------------------------|------|-------|-------|
| 4-Cyanobenzenesulfonamide                | 0.23 | -0.17 | 0.40  |
| 4-Cyanobenzoic acid                      | 1.56 | 0.82  | 0.74  |
| 4-Cyanoformanilide                       | 1.08 | 0.64  | 0.44  |
| 4-Cyano-N-formylstyrylamine              | 1.58 | 0.73  | 0.85  |
| 4-Cyanophenoxyacetic acid                | 0.93 | 0.84  | 0.09  |
| 4-Cyanophenyl N-methylcarbamate          | 0.95 | 0.82  | 0.13  |
| 4-Cyanopyrazole                          | 0.24 | 0.49  | -0.25 |
| 4-Cyanopyridine                          | 0.46 | 0.25  | 0.21  |
| 4-Cyclohexylphenoxyacetic acid           | 3.79 | 3.35  | 0.44  |
| 4-Cyclopentylphenoxyacetic acid          | 3.41 | 3.05  | 0.36  |
| 4-Cyclopropyl-2-butanone                 | 1.5  | 1.93  | -0.43 |
| 4-Diethylaminobenzylalcohol              | 2.29 | 2.03  | 0.26  |
| 4-Dimethylamino-beta-nitrostyrene        | 2.67 | 1.9   | 0.77  |
| 4-Ethoxyacetanilide                      | 1.58 | 1.84  | -0.26 |
| 4-Ethoxybenzamide                        | 1.3  | 0.92  | 0.38  |
| 4-Ethoxyphenol                           | 1.81 | 2.19  | -0.38 |
| 4-Ethoxyphenyl N-methylcarbamate         | 1.63 | 1.81  | -0.18 |
| 4-Ethoxyphenylacetate                    | 1.95 | 2.54  | -0.59 |
| 4-Ethylaniline                           | 1.96 | 2.1   | -0.14 |
| 4-Ethylbenzenesulfonamide                | 1.31 | 1.24  | 0.07  |
| 4-Ethylbenzylidene t-butylamine N-oxide  | 2.19 | 2.1   | 0.09  |
| 4-Ethylphenol                            | 2.5  | 2.61  | -0.11 |
| 4-Ethylphenyl N-methylcarbamate          | 2.23 | 2.23  | 0.00  |
| 4-Ethylphenylacetate                     | 2.56 | 2.96  | -0.40 |
| 4-Ethylpyridine                          | 1.65 | 1.66  | -0.01 |
| 4-Ethyltoluene                           | 3.63 | 3.53  | 0.10  |
| 4-Fluoroacetanilide                      | 1.47 | 1.5   | -0.03 |
| 4-Fluoroaniline                          | 1.46 | 1.34  | 0.12  |
| 4-Fluorobenzamide                        | 0.91 | 0.58  | 0.33  |
| 4-Fluorobenzoic acid                     | 1.67 | 1.47  | 0.20  |
| 4-Fluorobenzylidene t-butylamine N-oxide | 1.42 | 1.34  | 0.08  |
| 4-Fluoronitrobenzene                     | 1.99 | 2.12  | -0.13 |
| 4-Fluorophenol                           | 1.79 | 1.85  | -0.06 |
| 4-Fluorophenoxyacetic acid               | 1.41 | 1.49  | -0.08 |
| 4-Fluorophenyl N-methylcarbamate         | 1.28 | 1.47  | -0.19 |
| 4-Fluorophenylacetic acid                | 1.55 | 1.91  | -0.36 |
| 4-Fluorothiophenol                       | 2.92 | 2.22  | 0.70  |
| 4-Formylphenoxyacetic acid               | 0.79 | 0.81  | -0.02 |
| 4-Heptanol                               | 2.22 | 2.17  | 0.05  |
| 4-Heptanone                              | 1.91 | 2.17  | -0.26 |
| 4-Heptyn-2-ol                            | 1.18 | 1.69  | -0.51 |
| 4-Heptyn-3-ol                            | 1.73 | 1.69  | 0.04  |

|                                              |       |      |       |
|----------------------------------------------|-------|------|-------|
| 4-Hexylpyridine                              | 3.84  | 3.42 | 0.42  |
| 4-Hexylresorcinol                            | 3.45  | 3.97 | -0.52 |
| 4-Hexyn-3-ol                                 | 1.2   | 1.25 | -0.05 |
| 4-Hydroxy-3-methoxybenzaldehyde              | 0.97  | 1.1  | -0.13 |
| 4-Hydroxybenzamide                           | 0.25  | 0.16 | 0.09  |
| 4-Hydroxybenzenesulfonamide                  | 0.06  | 0.06 | 0.00  |
| 4-Hydroxybenzoic acid heptylester            | 4.83  | 4.01 | 0.82  |
| 4-Hydroxybenzonitrile                        | 1.6   | 1.2  | 0.40  |
| 4-Hydroxybenzylalcohol                       | 0.25  | 0.84 | -0.59 |
| 4-Hydroxy-beta-nitrostyrene                  | 2.12  | 1.81 | 0.31  |
| 4-Hydroxybiphenyl                            | 3.2   | 3.47 | -0.27 |
| 4-Hydroxy-N-Nitrosopiperidine                | -0.89 | -0.5 | -0.39 |
| 4-Hydroxyphenoxyacetic acid                  | 0.65  | 1.07 | -0.42 |
| 4-Hydroxyphenylacetic acid                   | 1.96  | 1.49 | 0.47  |
| 4'-Hydroxypropiophenone                      | 2.03  | 1.75 | 0.28  |
| 4-Iodoacetanilide                            | 2.46  | 2.49 | -0.03 |
| 4-Iodoaniline                                | 2.34  | 2.33 | 0.01  |
| 4-Iodobenzamide                              | 1.99  | 1.57 | 0.42  |
| 4-Iodobenzoic acid                           | 3.02  | 2.46 | 0.56  |
| 4-Iodophenol                                 | 2.9   | 2.84 | 0.06  |
| 4-Iodophenoxyacetic acid                     | 2.64  | 2.48 | 0.16  |
| 4-Iodophenyl N-methylcarbamate               | 2.46  | 2.46 | 0.00  |
| 4-Isopropyl-3-methylphenyl N-methylcarbamate | 3.11  | 2.85 | 0.26  |
| 4-Isopropylaniline                           | 2.47  | 2.38 | 0.09  |
| 4-Isopropylbenzamide                         | 2.14  | 1.62 | 0.52  |
| 4-Isopropylphenoxyacetic acid                | 2.69  | 2.53 | 0.16  |
| 4-Isothiocyanatobenzophenone                 | 4.88  | 3.96 | 0.92  |
| 4-Isothiocyanatodiphenylamine                | 4.94  | 4.49 | 0.45  |
| 4-Isothiocyanatodiphenylether                | 4.75  | 4.81 | -0.06 |
| 4-Isothiocyanatophenylbenzoate               | 4.9   | 4.43 | 0.47  |
| 4-Methoxyacetanilide                         | 1.14  | 1.41 | -0.27 |
| 4-Methoxyaniline                             | 0.95  | 1.25 | -0.30 |
| 4-Methoxybenzaldehyde                        | 1.59  | 1.5  | 0.09  |
| 4-Methoxybenzamide                           | 0.86  | 0.49 | 0.37  |
| 4-Methoxybenzoic acid                        | 1.96  | 1.38 | 0.58  |
| 4-Methoxybenzylidene t-butylamine N-oxide    | 1.21  | 1.25 | -0.04 |
| 4-Methoxy-beta-nitrostyrene                  | 2.2   | 2.14 | 0.06  |
| 4-Methoxycarbonylphenyl N-methylcarbamate    | 1.5   | 1    | 0.50  |
| 4-Methoxyformanilide                         | 1.03  | 1.2  | -0.17 |
| 4-Methoxy-N,N-dimethylaniline                | 1.42  | 1.85 | -0.43 |
| 4-Methoxyphenol                              | 1.34  | 1.76 | -0.42 |
| 4-Methoxyphenoxyacetic acid                  | 1.23  | 1.4  | -0.17 |

|                                          |      |       |       |
|------------------------------------------|------|-------|-------|
| 4-Methoxyphenyl N,N-dimethylcarbamate    | 1.53 | 1.72  | -0.19 |
| 4-Methoxyphenyl N-methylcarbamate        | 1.2  | 1.38  | -0.18 |
| 4-Methoxyphenylacetate                   | 1.54 | 2.11  | -0.57 |
| 4-Methoxyphenylacetic acid               | 1.42 | 1.82  | -0.40 |
| 4-Methoxytoluene                         | 2.81 | 2.5   | 0.31  |
| 4-Methyl-1-heptyn-3-ol                   | 2.13 | 1.67  | 0.46  |
| 4-Methyl-1H-pyrazole                     | 0.9  | 1.46  | -0.56 |
| 4-Methyl-1-pentyn-3-ol                   | 1.07 | 0.79  | 0.28  |
| 4-Methyl-2-nitroaniline                  | 1.82 | 2.04  | -0.22 |
| 4-Methyl-2-pentanol                      | 1.53 | 1.57  | -0.04 |
| 4-Methyl-5-methoxy-8-quinolinol          | 2.75 | 2.15  | 0.60  |
| 4-Methyl-8-quinolinol                    | 2.36 | 2.22  | 0.14  |
| 4-Methylacetophenone                     | 2.28 | 2.05  | 0.23  |
| 4-Methylbenzenesulfonamide               | 0.82 | 0.8   | 0.02  |
| 4-Methylbenzoic acid                     | 2.27 | 1.79  | 0.48  |
| 4-Methylbenzylalcohol                    | 1.59 | 1.58  | 0.01  |
| 4-Methylbenzylidene t-butylamine N-oxide | 1.74 | 1.66  | 0.08  |
| 4-Methyl-beta-nitrostyrene               | 2.66 | 2.55  | 0.11  |
| 4-Methylcyclohexanone                    | 1.38 | 1.79  | -0.41 |
| 4-Methyldibenzothiophene                 | 4.8  | 4.85  | -0.05 |
| 4-Methylformanilide                      | 1.61 | 1.61  | 0.00  |
| 4-Methyl-N-nitrosopiperazine             | 0.2  | -0.57 | 0.77  |
| 4-Methyl-N-nitrosopiperidine             | 1.05 | 1.08  | -0.03 |
| 4-Methylphenoxyacetic acid               | 1.86 | 1.81  | 0.05  |
| 4-Methylphenylacetic acid                | 1.86 | 2.23  | -0.37 |
| 4-Methylphenylisothiocyanate             | 3.92 | 3.52  | 0.40  |
| 4-Methylpyridine                         | 1.22 | 1.22  | 0.00  |
| 4-Methylstyrene                          | 3.35 | 3.31  | 0.04  |
| 4-Methylsulfonylbenzoic acid             | 0.67 | 0.44  | 0.23  |
| 4-Methylumbelliferon                     | 1.58 | 2.47  | -0.89 |
| 4-Methylvaleronitrile                    | 1.54 | 1.9   | -0.36 |
| 4-Nitroacetanilide                       | 1.66 | 1.35  | 0.31  |
| 4-Nitroacetophenone                      | 1.49 | 1.58  | -0.09 |
| 4-Nitroaniline                           | 1.37 | 1.19  | 0.18  |
| 4-Nitroanisole                           | 2.03 | 2.03  | 0.00  |
| 4-Nitrobenzaldehyde                      | 1.56 | 1.44  | 0.12  |
| 4-Nitrobenzamide                         | 0.82 | 0.43  | 0.39  |
| 4-Nitrobenzenesulfonamide                | 0.64 | 0.33  | 0.31  |
| 4-Nitrobenzoic acid                      | 1.89 | 1.32  | 0.57  |
| 4-Nitrobenzonitrile                      | 1.19 | 1.47  | -0.28 |
| 4-Nitrobenzylalcohol                     | 1.26 | 1.11  | 0.15  |
| 4-Nitroformanilide                       | 1.43 | 1.14  | 0.29  |

|                                            |       |       |       |
|--------------------------------------------|-------|-------|-------|
| 4-Nitrophenetole                           | 2.53  | 2.46  | 0.07  |
| 4-Nitrophenol                              | 1.91  | 1.7   | 0.21  |
| 4-Nitrophenoxyacetic acid                  | 1.48  | 1.34  | 0.14  |
| 4-Nitrophenyl N-methylcarbamate            | 1.47  | 1.32  | 0.15  |
| 4-Nitrophenylacetate                       | 1.49  | 2.05  | -0.56 |
| 4-Nitrophenylacetic acid                   | 1.39  | 1.76  | -0.37 |
| 4-Nitrophenylisothiocyanate                | 3.62  | 3.05  | 0.57  |
| 4-Nitrophthalic acid                       | 1     | 0.39  | 0.61  |
| 4-Nitropyrazole                            | 0.59  | 0.52  | 0.07  |
| 4-Nitropyridine                            | 0.48  | 0.75  | -0.27 |
| 4-Nitroquinoline                           | 2.06  | 2.15  | -0.09 |
| 4-Nitroquinoline-1-oxide                   | 1.02  | 0.76  | 0.26  |
| 4-Nitrotoluene                             | 2.42  | 2.44  | -0.02 |
| 4-Nonylphenol                              | 4.48  | 5.69  | -1.21 |
| 4-Octanol                                  | 2.68  | 2.61  | 0.07  |
| 4-Octylphenol                              | 4.12  | 5.25  | -1.13 |
| 4-Pentoxyphenol                            | 3.26  | 3.51  | -0.25 |
| 4-Pentylpyrazole                           | 2.96  | 3.22  | -0.26 |
| 4-Pentyn-2-ol                              | 0.12  | 0.51  | -0.39 |
| 4-Phenoxybenzoic acid                      | 3.21  | 3.08  | 0.13  |
| 4-Phenyl-1-butanol                         | 2.35  | 2.56  | -0.21 |
| 4-Phenylbut-3-en-2-one                     | 2.07  | 2.19  | -0.12 |
| 4-Phenylbutylamine                         | 2.39  | 2.47  | -0.08 |
| 4-Phenylbutyramide                         | 1.41  | 1.88  | -0.47 |
| 4-Phenylbutyric acid                       | 2.42  | 2.77  | -0.35 |
| 4-Phenylbutyric acid methylester           | 2.77  | 3.1   | -0.33 |
| 4-Phenylbutyronitrile                      | 2.21  | 2.92  | -0.71 |
| 4-Phenyl-N-nitrosopiperidine               | 2.59  | 2.38  | 0.21  |
| 4-Phenylpyridine                           | 2.45  | 2.52  | -0.07 |
| 4-Phenyltoluene                            | 4.63  | 4.47  | 0.16  |
| 4-Propionylphenyl N-methylcarbamate        | 1.55  | 1.37  | 0.18  |
| 4-Propoylpyridine                          | 0.77  | 0.8   | -0.03 |
| 4-Propylbenzenesulfonamide                 | 1.64  | 1.68  | -0.04 |
| 4-Propylphenol                             | 3.2   | 3.05  | 0.15  |
| 4-Propylpyridine                           | 2.1   | 2.1   | 0.00  |
| 4-Pyridinemethanamine                      | -0.38 | -0.2  | -0.18 |
| 4-Pyridinemethanol                         | 0.06  | -0.11 | 0.17  |
| 4-Quinolone                                | 0.58  | 1.27  | -0.69 |
| 4-s-Butylphenoxyacetic acid                | 3.12  | 2.97  | 0.15  |
| 4-s-Butylphenyl N-methylcarbamate          | 3.2   | 2.95  | 0.25  |
| 4-Sulfamidobenzoic acid propylester        | 1.75  | 0.88  | 0.87  |
| 4-t-Butyl-3-methylphenyl N-methylcarbamate | 3.38  | 3.21  | 0.17  |

|                                             |       |       |       |
|---------------------------------------------|-------|-------|-------|
| 4-t-Butyl-N-nitrosopiperidine               | 1.96  | 2.16  | -0.20 |
| 4-t-Butylphenol                             | 3.31  | 3.25  | 0.06  |
| 4-t-Butylphenyl N-methylcarbamate           | 3.06  | 2.87  | 0.19  |
| 4-t-Butyltoluene                            | 5.17  | 4.21  | 0.96  |
| 4-Thiocresol                                | 3.27  | 2.54  | 0.73  |
| 4-Tolyl N-methylcarbamate                   | 1.66  | 1.79  | -0.13 |
| 4-Tolylacetate                              | 2.11  | 2.52  | -0.41 |
| 4-Trifluoromethylaniline                    | 1.95  | 2.25  | -0.30 |
| 4-Trifluoromethylbenzamide                  | 1.71  | 1.49  | 0.22  |
| 4-Trifluoromethylphenylacetic acid          | 2.45  | 2.82  | -0.37 |
| 5-(2-Pyridyl)pentamide                      | 0.39  | 1.01  | -0.62 |
| 5-(2-Pyridyl)pentanol                       | 1.28  | 1.69  | -0.41 |
| 5-(2-Pyridyl)pentylamine                    | 1.32  | 1.6   | -0.28 |
| 5-(3-Pyridyl)pentamide                      | 0.4   | 0.97  | -0.57 |
| 5-(3-Pyridyl)pentanol                       | 1.41  | 1.65  | -0.24 |
| 5-(3-Pyridyl)pentylamine                    | 1.41  | 1.56  | -0.15 |
| 5-(4-Pyridyl)pentamide                      | 0.42  | 0.97  | -0.55 |
| 5-(4-Pyridyl)pentanol                       | 1.39  | 1.65  | -0.26 |
| 5-(4-Pyridyl)pentylamine                    | 1.4   | 1.56  | -0.16 |
| 5,5-Diphenylhydantoin                       | 2.47  | 2.42  | 0.05  |
| 5,6-Dibromo-2-trifluoromethylbenzimidazole  | 4.15  | 3.72  | 0.43  |
| 5,6-Dichloro-2-trifluoromethylbenzimidazole | 3.99  | 3.48  | 0.51  |
| 5,6-Dichlorovanillin                        | 2.47  | 2.16  | 0.31  |
| 5,6-Dimethylbenzimidazole                   | 2.35  | 1.94  | 0.41  |
| 5,8-Dihydroxy-4-methylquinoline             | 1.59  | 1.82  | -0.23 |
| 5-Allyl-5-butylbarbituric acid              | 1.35  | 1.54  | -0.19 |
| 5-Allyl-5-ethylbarbituric acid              | 0.95  | 0.66  | 0.29  |
| 5-Amino-1-pentanol                          | -0.53 | -0.16 | -0.37 |
| 5-Aminoquinoline                            | 1.16  | 1.37  | -0.21 |
| 5-Amyl-5-ethylbarbituric acid               | 2.24  | 1.76  | 0.48  |
| 5-Azauracil                                 | -1.87 | -0.85 | -1.02 |
| 5-Bromo-2-trifluoromethylbenzimidazole      | 3.57  | 3.07  | 0.50  |
| 5-Bromoindole                               | 3     | 2.78  | 0.22  |
| 5-Bromopentyl acetate                       | 2.15  | 2.37  | -0.22 |
| 5-Bromosalicylic acid                       | 2.87  | 2.21  | 0.66  |
| 5-Bromouracil                               | -0.21 | 0.03  | -0.24 |
| 5-Bromovaleric acid                         | 1.21  | 1.61  | -0.40 |
| 5-Bromovaleronitrile                        | 1.05  | 1.76  | -0.71 |
| 5-Butyl-N-methylbarbituric acid             | 1.1   | 0.41  | 0.69  |
| 5-Chloro-1-phenyltetrazole                  | 1.48  | 1.99  | -0.51 |
| 5-Chloro-2-methylthiobenzimidazole          | 3.22  | 2.73  | 0.49  |
| 5-Chloro-2-trifluoromethylbenzimidazole     | 3.39  | 2.95  | 0.44  |

|                                                 |       |       |       |
|-------------------------------------------------|-------|-------|-------|
| 5-Chloro-6-nitro-2-trifluoromethylbenzimidazole | 3.21  | 2.82  | 0.39  |
| 5-Chloropentylacetate                           | 2.01  | 2.29  | -0.28 |
| 5-Chloroquinoxaline                             | 1.75  | 1.86  | -0.11 |
| 5-Chlorouracil                                  | -0.35 | -0.1  | -0.25 |
| 5-Chlorovaleric acid                            | 1.07  | 1.53  | -0.46 |
| 5-Chlorovaleronitrile                           | 0.91  | 1.68  | -0.77 |
| 5-Chlorovanillin                                | 1.76  | 1.63  | 0.13  |
| 5-Dimethylamino-1,3,6-trimethyluracil           | 0.99  | 0.29  | 0.70  |
| 5-Formyluracil                                  | -1.03 | -1.26 | 0.23  |
| 5-Hexyn-2-one                                   | 0.58  | 0.95  | -0.37 |
| 5-Hexyn-3-ol                                    | 0.65  | 0.95  | -0.30 |
| 5-Methoxy-8-quinolinol                          | 2.06  | 1.81  | 0.25  |
| 5-Methoxyindole                                 | 2.06  | 2.06  | 0.00  |
| 5-Methyl-1-hexyn-3-ol                           | 1.6   | 1.23  | 0.37  |
| 5-Methyl-4-nitroquinoline-1-oxide               | 1.36  | 1.1   | 0.26  |
| 5-Methyl-5-hexen-2-one                          | 1.29  | 1.92  | -0.63 |
| 5-Methyl-8-quinolinol                           | 2.37  | 2.22  | 0.15  |
| 5-Methylindole                                  | 2.68  | 2.47  | 0.21  |
| 5-Methylquinoxaline                             | 2.04  | 1.67  | 0.37  |
| 5-Methyluracil                                  | -0.62 | -0.26 | -0.36 |
| 5-Nitro-2-trifluoromethylbenzimidazole          | 2.68  | 2.29  | 0.39  |
| 5-Nitroimidazole                                | -0.16 | 0.41  | -0.57 |
| 5-Nitroquinoline                                | 1.86  | 2.15  | -0.29 |
| 5-Nitroquinoline-1-oxide                        | 0.49  | 0.76  | -0.27 |
| 5-Nitrosalicylic acid                           | 2.34  | 1.43  | 0.91  |
| 5-Nonanone                                      | 2.88  | 3.05  | -0.17 |
| 5-Octyn-3-ol                                    | 1.71  | 2.13  | -0.42 |
| 5-Phenyl-2-pentanone                            | 2.42  | 3.03  | -0.61 |
| 5-Phenylvaleric acid                            | 2.92  | 3.21  | -0.29 |
| 5-t-Butyl-3-methylphenyl N-methylcarbamate      | 3.35  | 3.21  | 0.14  |
| 5-t-Butyl-4-hydroxy-2-methylacetanilide         | 2.67  | 2.84  | -0.17 |
| 6,7-Dimethyl-1,4-naphthoquinone                 | 2.49  | 1.81  | 0.68  |
| 6-Amino-1-hexanol                               | -0.01 | 0.28  | -0.29 |
| 6-Aminopurine                                   | -0.09 | -0.35 | 0.26  |
| 6-Aminoquinoline                                | 1.28  | 1.37  | -0.09 |
| 6-Azaauracil                                    | -0.59 | -0.2  | -0.39 |
| 6-Bromo-1-hexanol                               | 1.73  | 1.84  | -0.11 |
| 6-Bromohexanoic acid                            | 1.74  | 2.05  | -0.31 |
| 6-Bromoquinoline                                | 2.83  | 2.93  | -0.10 |
| 6-Chloro-1-hexanol                              | 1.59  | 1.76  | -0.17 |
| 6-Chloro-1-methyl-4-phenylquinazolin-2-one      | 2.38  | 3.06  | -0.68 |
| 6-Chloro-4-nitroquinoline-1-oxide               | 1.41  | 1.29  | 0.12  |

|                                              |       |      |       |
|----------------------------------------------|-------|------|-------|
| 6-Chloroquinoline                            | 2.73  | 2.81 | -0.08 |
| 6-Chloroquinoxaline                          | 2.1   | 1.86 | 0.24  |
| 6-Chlorovanillin                             | 1.76  | 1.63 | 0.13  |
| 6-Cyanoquinoxaline                           | 1.01  | 0.7  | 0.31  |
| 6-Fluoro-1-methyl-4-phenylquinazolin-2-one   | 1.87  | 2.55 | -0.68 |
| 6-Hydroxy-1-methyl-4-phenylquinazolin-2-one  | 1.72  | 2.13 | -0.41 |
| 6-Isopropyl-3-methylphenyl N-methylcarbamate | 2.84  | 2.85 | -0.01 |
| 6-Mercaptopurine                             | -0.18 | 0.19 | -0.37 |
| 6-Methoxyquinoline                           | 2.2   | 2.21 | -0.01 |
| 6-Methyl-1,4-naphthoquinone                  | 2.1   | 1.47 | 0.63  |
| 6-Methyl-4-nitroquinoline-1-oxide            | 1.43  | 1.1  | 0.33  |
| 6-Methylquinoline                            | 2.57  | 2.62 | -0.05 |
| 6-Nitroquinoline                             | 1.84  | 2.15 | -0.31 |
| 6-Nitroquinoline-1-oxide                     | 0.39  | 0.76 | -0.37 |
| 6-t-Butyl-3-methylphenyl N-methylcarbamate   | 3.14  | 3.21 | -0.07 |
| 7,12-Dimethylbenz[a]anthracene               | 5.8   | 6.31 | -0.51 |
| 7-Azaindole                                  | 1.82  | 1.62 | 0.20  |
| 7-Bromoheptanenitrile                        | 2.1   | 2.64 | -0.54 |
| 7-Bromoquinoline                             | 2.92  | 2.93 | -0.01 |
| 7-Chloro-1-methyl-4-phenylquinazolin-2-one   | 2.36  | 3.06 | -0.70 |
| 7-Chloroheptanonitrile                       | 1.96  | 2.56 | -0.60 |
| 7-Dimethylaminoquinoline                     | 2.71  | 1.97 | 0.74  |
| 7-Methoxyquinoline                           | 2.37  | 2.21 | 0.16  |
| 7-Methyl-4-nitroquinoline-1-oxide            | 1.42  | 1.1  | 0.32  |
| 7-Methylquinoline                            | 2.47  | 2.62 | -0.15 |
| 7-Nitroquinoline                             | 1.82  | 2.15 | -0.33 |
| 7-Nitroquinoline-1-oxide                     | 0.36  | 0.76 | -0.40 |
| 7-Tridecanone                                | 5.08  | 4.81 | 0.27  |
| 7-Trifluoromethylquinoline                   | 3.02  | 3.21 | -0.19 |
| 8-Aminoquinoline                             | 1.79  | 1.37 | 0.42  |
| 8-Bromo-1-octanol                            | 2.79  | 2.72 | 0.07  |
| 8-Bromooctanoic acid                         | 2.79  | 2.93 | -0.14 |
| 8-Chloro-1-octanol                           | 2.65  | 2.64 | 0.01  |
| 8-Chloroquinoline                            | 2.33  | 2.81 | -0.48 |
| 8-Fluoro-4-nitroquinoline-1-oxide            | 1     | 0.78 | 0.22  |
| 8-Methoxyquinoline                           | 1.84  | 2.21 | -0.37 |
| 8-Methyl-4-nitroquinoline-1-oxide            | 1.59  | 1.1  | 0.49  |
| 8-Methylquinoline                            | 2.6   | 2.62 | -0.02 |
| 8-Nitroquinoline                             | 1.4   | 2.15 | -0.75 |
| 8-Nitroquinoline-1-oxide                     | 0.04  | 0.76 | -0.72 |
| 8-Quinolinol                                 | 2     | 1.88 | 0.12  |
| 8-Sulfonamidoquinoline                       | 0.36  | 1.02 | -0.66 |

|                                   |       |       |       |
|-----------------------------------|-------|-------|-------|
| 8-Trifluoromethylquinoline        | 2.5   | 3.21  | -0.71 |
| 9-(1-(hydroxymethyl)butyl)adenine | 0.66  | 0.34  | 0.32  |
| 9,10-Benzophenanthrene            | 5.49  | 5.59  | -0.10 |
| 9,10-Dihydroanthracene            | 4.25  | 5.17  | -0.92 |
| 9,10-Dimethylantracene            | 5.69  | 5.23  | 0.46  |
| 9-Acetylcarbazole                 | 3.45  | 2.98  | 0.47  |
| 9-Acridinamine                    | 2.74  | 2.77  | -0.03 |
| 9-Anthracenol                     | 3.61  | 3.83  | -0.22 |
| 9-Butyladenine                    | 1.25  | 1.24  | 0.01  |
| 9H-Fluoren-9-imine                | 2.43  | 3.09  | -0.66 |
| 9H-Fluoren-9-one                  | 3.58  | 3.15  | 0.43  |
| 9-Methylantracene                 | 5.07  | 4.87  | 0.20  |
| 9-Pentyladenine                   | 1.79  | 1.68  | 0.11  |
| 9-Propyladenine                   | 0.74  | 0.8   | -0.06 |
| Abstral                           | 4.05  | 4.53  | -0.48 |
| Accuretic                         | -0.03 | 0.06  | -0.09 |
| Acebutolol                        | 1.77  | 1.31  | 0.46  |
| Acenaphthene                      | 3.92  | 4.35  | -0.43 |
| Acenaphthylene                    | 4.03  | 4.09  | -0.06 |
| Acetaldehyde                      | 0.45  | 0.27  | 0.18  |
| Acetamide                         | -1.26 | -0.74 | -0.52 |
| Acetanilide                       | 1.16  | 1.48  | -0.32 |
| Acethydrazide                     | -1.58 | -1.03 | -0.55 |
| Acetic acid                       | -0.17 | 0.15  | -0.32 |
| Acetone oxime                     | 0.12  | 0.14  | -0.02 |
| Acetonitrile                      | -0.34 | 0.3   | -0.64 |
| Acetonylacetone                   | -0.27 | 0.43  | -0.70 |
| Acetophenone                      | 1.63  | 1.71  | -0.08 |
| Acetylacetone                     | 0.4   | -0.01 | 0.41  |
| Acetylsulfanilamide               | -0.96 | -0.29 | -0.67 |
| Acetylthiobenzene                 | 2.23  | 2.32  | -0.09 |
| Aciclovir                         | -1.56 | -1.43 | -0.13 |
| Acrylamide                        | -0.67 | -0.52 | -0.15 |
| Acrylic acid                      | 0.35  | 0.37  | -0.02 |
| Acticin                           | 6.5   | 6.58  | -0.08 |
| Actidione                         | 0.55  | 0.86  | -0.31 |
| Actiprofen                        | 3.51  | 3.67  | -0.16 |
| Acular                            | 2.1   | 2.76  | -0.66 |
| Adazine                           | 5.19  | 5.39  | -0.20 |
| Adrucil                           | -0.95 | -0.92 | -0.03 |
| Akineton                          | 4.25  | 4.54  | -0.29 |
| Alachlor                          | 3.52  | 3.11  | 0.41  |

|                                    |       |       |       |
|------------------------------------|-------|-------|-------|
| Alclofenac                         | 2.47  | 3     | -0.53 |
| Aldosterone                        | 1.08  | 1.37  | -0.29 |
| Aldrin                             | 6.5   | 6.25  | 0.25  |
| Allobarbitol                       | 1.07  | 0.88  | 0.19  |
| Allyl alcohol                      | 0.17  | 0.16  | 0.01  |
| Allyl bromide                      | 1.79  | 1.63  | 0.16  |
| Allyl butyrate                     | 1.81  | 2.01  | -0.20 |
| Allyl chloride                     | 1.69  | 1.55  | 0.14  |
| Allyl cyanide                      | 0.4   | 0.96  | -0.56 |
| Allyl heptanoate                   | 3.4   | 3.33  | 0.07  |
| Allyl hexanoate                    | 2.87  | 2.89  | -0.02 |
| Allyl phenyl ether                 | 2.94  | 2.81  | 0.13  |
| Allyl propanoate                   | 1.28  | 1.57  | -0.29 |
| Allylamine                         | 0.07  | 0.07  | 0.00  |
| Allylethylamine                    | 0.81  | 1.03  | -0.22 |
| Allylisopropylacetamide            | 1.14  | 1.62  | -0.48 |
| Allylpropylamine                   | 1.33  | 1.47  | -0.14 |
| alpha,alpha-Dimethylphenethylamine | 1.9   | 2.42  | -0.52 |
| alpha-Chloroisovalerylurea         | 1     | 0.78  | 0.22  |
| alpha-D-Arabinopyranose            | -3.02 | -2.42 | -0.60 |
| alpha-Estradiol                    | 4.01  | 4.23  | -0.22 |
| alpha-Hydroxybenzylpenicillin      | 1.4   | 0.6   | 0.80  |
| alpha-Hydroxybutyric acid          | -0.36 | -0.27 | -0.09 |
| alpha-Ionone                       | 3.85  | 3.5   | 0.35  |
| alpha-Methyl benzylamine           | 1.4   | 1.58  | -0.18 |
| alpha-Methylstyrene                | 3.48  | 3.38  | 0.10  |
| alpha-Pinene                       | 4.44  | 3.98  | 0.46  |
| alpha-Terpinene                    | 4.25  | 4.17  | 0.08  |
| Alprazolam                         | 4.9   | 4.97  | -0.07 |
| Alprenolol                         | 3.1   | 2.7   | 0.40  |
| Ametryn                            | 2.98  | 3.16  | -0.18 |
| Aminocarb                          | 1.9   | 1.48  | 0.42  |
| Aminopyrazine                      | -0.07 | -0.54 | 0.47  |
| Aminopyrine                        | 0.85  | 0.94  | -0.09 |
| Amlodipine                         | 3.74  | 3.46  | 0.28  |
| Amoxicillin                        | -1.71 | -2.01 | 0.30  |
| Ampicillin                         | -2.17 | -1.61 | -0.56 |
| Amyl acetate                       | 2.3   | 2.23  | 0.07  |
| Amyl formate                       | 1.79  | 1.69  | 0.10  |
| Amyl propionate                    | 2.83  | 2.67  | 0.16  |
| Amylamine                          | 1.49  | 1.17  | 0.32  |
| Amylbenzene                        | 4.9   | 4.55  | 0.35  |

|                          |       |       |       |
|--------------------------|-------|-------|-------|
| Amylisoithiocyanate      | 3.48  | 3.55  | -0.07 |
| Amylobarbitone           | 2.07  | 1.6   | 0.47  |
| Anabesine                | 0.97  | 1.13  | -0.16 |
| Aniline                  | 0.94  | 1.32  | -0.38 |
| Anise alcohol            | 1.1   | 1.17  | -0.07 |
| Anisole                  | 2.11  | 2.16  | -0.05 |
| Anthracene               | 4.5   | 4.51  | -0.01 |
| Antipyrine               | 0.23  | 0.87  | -0.64 |
| Aprobarbital             | 1.37  | 0.94  | 0.43  |
| Arabinose                | -3.02 | -2.93 | -0.09 |
| Arabinosylhypoxanthine   | -2.08 | -2.24 | 0.16  |
| Arbutin                  | -1.35 | -0.52 | -0.83 |
| Arformoterol             | 1.91  | 1.99  | -0.08 |
| Aspartic acid            | -3.7  | -3.09 | -0.61 |
| Aspirin                  | 1.23  | 1.91  | -0.68 |
| Astemizole               | 5.8   | 5.73  | 0.07  |
| Atenolol                 | 0.16  | 0.47  | -0.31 |
| Atomoxetine              | 3.7   | 4.13  | -0.43 |
| Atrazine                 | 2.61  | 2.61  | 0.00  |
| Azanidazole              | 0.85  | 0.12  | 0.73  |
| Azatadine                | 3.59  | 4.47  | -0.88 |
| Azathioprine             | 1.07  | 1.05  | 0.02  |
| Azulene                  | 3.2   | 3.57  | -0.37 |
| Azulfidine               | 3.61  | 3.29  | 0.32  |
| Baclofen                 | -0.96 | -0.33 | -0.63 |
| Bactrim                  | 0.88  | 1.4   | -0.52 |
| Banzel                   | 0.9   | 0.26  | 0.64  |
| Barbital                 | 0.65  | 0.44  | 0.21  |
| Barbituric acid          | -1.44 | -1.08 | -0.36 |
| Bayleton                 | 3.26  | 3.57  | -0.31 |
| BCNU                     | 1.53  | 1.37  | 0.16  |
| Benadryl                 | 3.27  | 3.6   | -0.33 |
| Benalaxyl                | 3.4   | 3.98  | -0.58 |
| Bendroflumethiazide      | 1.19  | 1.62  | -0.43 |
| Benefin                  | 5.29  | 4.57  | 0.72  |
| Benomyl                  | 2.12  | 2.39  | -0.27 |
| Benorylate               | 2.15  | 2.68  | -0.53 |
| Bensulfuron-methyl       | 2.45  | 2.21  | 0.24  |
| Bentazone                | 2.83  | 2.69  | 0.14  |
| Benz[a]anthracene        | 5.79  | 5.59  | 0.20  |
| Benz[e]acephenanthrylene | 5.78  | 6.41  | -0.63 |
| Benzalacetophenone       | 3.08  | 3.49  | -0.41 |

|                        |       |       |       |
|------------------------|-------|-------|-------|
| Benzalcyanoacetamide   | 1.5   | 0.48  | 1.02  |
| Benzaldehyde           | 1.48  | 1.57  | -0.09 |
| Benzalmalonodiamide    | -0.13 | -0.56 | 0.43  |
| Benzalmalonodinitrile  | 2.12  | 1.52  | 0.60  |
| Benzamide              | 0.64  | 0.56  | 0.08  |
| Benzanilide            | 2.7   | 2.78  | -0.08 |
| Benzedrine             | 1.76  | 2.02  | -0.26 |
| Benzene                | 2.13  | 2.35  | -0.22 |
| Benzenecarbothioamide  | 1.49  | 0.89  | 0.60  |
| Benzenesulfonamide     | 0.31  | 0.46  | -0.15 |
| Benzenethiol           | 2.52  | 2.2   | 0.32  |
| Benzimidazole          | 1.32  | 1.26  | 0.06  |
| Benzimidazole-2-thione | 1.66  | 1.68  | -0.02 |
| Benzo[a]fluorene       | 5.68  | 5.79  | -0.11 |
| Benzo[a]naphthacene    | 6.81  | 6.67  | 0.14  |
| Benzo[a]phenanthrene   | 5.73  | 5.59  | 0.14  |
| Benzo[a]pyrene         | 5.97  | 6.13  | -0.16 |
| Benzo[b]fluorene       | 5.77  | 5.79  | -0.02 |
| Benzo[b]furan          | 2.67  | 2.67  | 0.00  |
| Benzo[b]triphenylene   | 6.17  | 6.67  | -0.50 |
| Benzo[e]pyrene         | 6.44  | 6.13  | 0.31  |
| Benzo[f]quinoline      | 3.25  | 3.28  | -0.03 |
| Benzo[g,h,i]perylene   | 6.63  | 6.67  | -0.04 |
| Benzo[ghi]fluoranthene | 5.78  | 5.73  | 0.05  |
| Benzo[j]fluoranthene   | 6.4   | 6.41  | -0.01 |
| Benzo[k]fluoranthene   | 6.11  | 6.41  | -0.30 |
| Benzohydroxamic acid   | 0.26  | 0.14  | 0.12  |
| Benzoic acid           | 1.87  | 1.45  | 0.42  |
| Benzonitrile           | 1.56  | 1.6   | -0.04 |
| Benzophenone           | 3.18  | 3.01  | 0.17  |
| Benzothiazole          | 2.02  | 1.95  | 0.07  |
| Benzotrifluoride       | 3.01  | 3.16  | -0.15 |
| Benzoylhydrazine       | 0.19  | 0.27  | -0.08 |
| Benzyl acetate         | 1.96  | 2.21  | -0.25 |
| Benzyl benzoate        | 3.97  | 3.51  | 0.46  |
| Benzyl butyl phthalate | 4.59  | 4.37  | 0.22  |
| Benzyl ethyl ether     | 2.16  | 2.43  | -0.27 |
| Benzyl methyl ether    | 1.35  | 2     | -0.65 |
| Benzylamine            | 1.09  | 1.15  | -0.06 |
| Benzylaniline          | 3.13  | 3.43  | -0.30 |
| Benzylisothiocyanate   | 2.83  | 3.53  | -0.70 |
| Benzylmethylaniline    | 1.52  | 1.56  | -0.04 |

|                                |       |       |       |
|--------------------------------|-------|-------|-------|
| Benzylpenicillin               | 1.83  | 1.9   | -0.07 |
| Benzylphenylether              | 3.79  | 3.89  | -0.10 |
| Benzylthiocyanate              | 1.99  | 2.36  | -0.37 |
| beta-Ethyl-beta-nitrostyrene   | 2.86  | 2.96  | -0.10 |
| beta-HCH                       | 3.78  | 4.03  | -0.25 |
| beta-Ionone                    | 3.84  | 3.63  | 0.21  |
| Betamethasone                  | 2.06  | 1.91  | 0.15  |
| beta-Nitrostyrene              | 2.24  | 2.21  | 0.03  |
| beta-Resorcylic acid           | 1.44  | 1.16  | 0.28  |
| Bevantolol                     | 3     | 3.21  | -0.21 |
| Bifenox                        | 4.48  | 4.34  | 0.14  |
| Bifonazole                     | 4.77  | 4.43  | 0.34  |
| Biphenyl                       | 4.01  | 4.11  | -0.10 |
| Bis(2-chloroethyl) ether       | 1.29  | 1.25  | 0.04  |
| Bis(2-hydroxyethyl)methylamine | -1.04 | -1.18 | 0.14  |
| Bisoprolol                     | 2.15  | 2.23  | -0.08 |
| Bisphenol A                    | 3.42  | 4.15  | -0.73 |
| Bitertanol                     | 4.16  | 4.32  | -0.16 |
| Bornyl acetate                 | 4.3   | 3.38  | 0.92  |
| Bremazocine                    | 3.2   | 4.13  | -0.93 |
| Brethine                       | 1.4   | 1.28  | 0.12  |
| Bromacil                       | 2.11  | 2.45  | -0.34 |
| Bromazepam                     | 1.65  | 1.64  | 0.01  |
| Bromoacetamide                 | -0.52 | -0.6  | 0.08  |
| Bromoacetic acid               | 0.41  | 0.29  | 0.12  |
| Bromoacetonitrile              | 0.36  | 0.44  | -0.08 |
| Bromobenzene                   | 2.99  | 2.88  | 0.11  |
| Bromocyclohexane               | 3.2   | 2.9   | 0.30  |
| Bromoethane                    | 1.61  | 1.41  | 0.20  |
| Bromoperidol                   | 3.65  | 3.91  | -0.26 |
| Bromophos                      | 5.21  | 4.83  | 0.38  |
| Bromophos-ethyl                | 6.15  | 5.69  | 0.46  |
| Broxuridine                    | -0.29 | -0.83 | 0.54  |
| Budeprion                      | 3.21  | 3.04  | 0.17  |
| Bufexamac                      | 1.47  | 1.82  | -0.35 |
| Bumetanide                     | 1.96  | 2.09  | -0.13 |
| Bunitrolol                     | 1.91  | 1.47  | 0.44  |
| Bunolol                        | 2.4   | 2.42  | -0.02 |
| Bupirimate                     | 2.7   | 2.73  | -0.03 |
| Bupranolol                     | 2.97  | 3.48  | -0.51 |
| Buspirone                      | 2.3   | 1.61  | 0.69  |
| Butachlor                      | 4.5   | 4.8   | -0.30 |

|                          |       |       |       |
|--------------------------|-------|-------|-------|
| Butanal                  | 0.88  | 1.15  | -0.27 |
| Butanamide               | -0.21 | 0.14  | -0.35 |
| Butane                   | 2.89  | 2.51  | 0.38  |
| Butanedioic acid         | -0.59 | -0.24 | -0.35 |
| Butanoic acid            | 0.79  | 1.03  | -0.24 |
| Butanoic anhydride       | 1.39  | 2.26  | -0.87 |
| Butobarbitone            | 1.73  | 1.32  | 0.41  |
| Butralin                 | 4.54  | 4.67  | -0.13 |
| Butyl 4-hydroxybenzoate  | 3.57  | 2.69  | 0.88  |
| Butyl butanoate          | 2.83  | 2.67  | 0.16  |
| Butyl propanoate         | 2.3   | 2.23  | 0.07  |
| Butyl thiocyanate        | 2.03  | 1.94  | 0.09  |
| Butyl-1,2-dinitrate      | 2.36  | 2.76  | -0.40 |
| Butylate                 | 4.15  | 3.79  | 0.36  |
| Butylbenzene             | 4.26  | 4.09  | 0.17  |
| Butylcellosolve          | 0.83  | 0.68  | 0.15  |
| Butyldimethylamine       | 1.7   | 1.55  | 0.15  |
| Butylisothiocyanate      | 2.92  | 3.11  | -0.19 |
| Butylmethylamine         | 1.33  | 1.14  | 0.19  |
| Butylmethylketone        | 1.38  | 1.73  | -0.35 |
| Butylnitrate             | 2.15  | 2.23  | -0.08 |
| Butylpropylamine         | 2.12  | 2.13  | -0.01 |
| Butyranilide             | 2.05  | 2.36  | -0.31 |
| Butyric acid hydrazide   | -0.62 | -0.15 | -0.47 |
| Butyric acid methylester | 1.29  | 1.36  | -0.07 |
| Butyronitrile            | 0.6   | 1.18  | -0.58 |
| Butyrophenone            | 2.77  | 2.59  | 0.18  |
| Caffeine                 | -0.07 | -0.29 | 0.22  |
| Camphene                 | 4.22  | 4.02  | 0.20  |
| Camphorquinone           | 1.52  | 1.53  | -0.01 |
| Capraldehyde             | 4.01  | 3.79  | 0.22  |
| Caproic aldehyde         | 1.78  | 2.03  | -0.25 |
| Caprolactone             | 0.31  | 1.43  | -1.12 |
| Caprylene                | 4.57  | 3.85  | 0.72  |
| Caprylic aldehyde        | 2.95  | 2.91  | 0.04  |
| Caprylonitrile           | 2.75  | 2.94  | -0.19 |
| Captopril                | 1.02  | 0.68  | 0.34  |
| Carazolol                | 3.73  | 3.15  | 0.58  |
| Carbamazepine            | 2.45  | 2.9   | -0.45 |
| Carbaril                 | 2.36  | 2.45  | -0.09 |
| Carbazole                | 3.72  | 3.68  | 0.04  |
| Carbendazim              | 1.52  | 1.45  | 0.07  |

|                              |       |       |       |
|------------------------------|-------|-------|-------|
| Carbenicillin                | 1.13  | 1.42  | -0.29 |
| Carbofuran                   | 2.32  | 2.45  | -0.13 |
| Carbophenothion              | 5.33  | 5.33  | 0.00  |
| Carbophos                    | 2.36  | 2.54  | -0.18 |
| Carbostyryl                  | 1.26  | 1.76  | -0.50 |
| Carbromal                    | 1.54  | 1.11  | 0.43  |
| Carbutamide                  | 1.01  | 1.34  | -0.33 |
| Carfecillin                  | 2.96  | 3.6   | -0.64 |
| Carvedilol                   | 4.14  | 3.97  | 0.17  |
| Carvone                      | 2.71  | 2.71  | 0.00  |
| Cathine                      | 0.67  | 0.72  | -0.05 |
| Cefacetrile                  | -0.45 | -0.38 | -0.07 |
| Cefaclor                     | -1.79 | -1.1  | -0.69 |
| Cefixime                     | 0.11  | 0.03  | 0.08  |
| Cefmetazole                  | -0.6  | -0.97 | 0.37  |
| Cefobid                      | -0.74 | -1.06 | 0.32  |
| Cefuroxime                   | -0.16 | 0     | -0.16 |
| Celebrex                     | 3.9   | 4.17  | -0.27 |
| Celiprolol                   | 1.92  | 1.97  | -0.05 |
| Cephamandole                 | 0.5   | -0.03 | 0.53  |
| Cetamolol                    | 1.36  | 0.71  | 0.65  |
| Cetane                       | 8.86  | 8.87  | -0.01 |
| Chloral                      | 0.99  | 1.6   | -0.61 |
| Chloral hydrate              | 0.99  | 0.65  | 0.34  |
| Chloramben                   | 1.11  | 1.6   | -0.49 |
| Chlorazine                   | 3.24  | 3.96  | -0.72 |
| Chlorbromuron                | 3.09  | 3.12  | -0.03 |
| Chlordane                    | 6.2   | 6.25  | -0.05 |
| Chlorfenidim                 | 1.94  | 2.05  | -0.11 |
| Chlorflurazole               | 3.49  | 3.48  | 0.01  |
| Chlorguanide                 | 2.53  | 2.39  | 0.14  |
| Chlorimuron-ethyl            | 2.7   | 2.31  | 0.39  |
| Chlorinate                   | 2.68  | 3.13  | -0.45 |
| Chlormidazole                | 4.36  | 4.1   | 0.26  |
| Chloroacetamide              | -0.53 | -0.68 | 0.15  |
| Chloroacetic acid            | 0.22  | 0.21  | 0.01  |
| Chloroacetic acid ethylester | 0.94  | 0.97  | -0.03 |
| Chloroacetonitrile           | 0.45  | 0.36  | 0.09  |
| Chloroambucil                | 3.7   | 3.68  | 0.02  |
| Chlorobenzene                | 2.84  | 2.76  | 0.08  |
| Chlorobutanol                | 2.03  | 1.95  | 0.08  |
| Chloroethane                 | 1.43  | 1.33  | 0.10  |

|                                    |       |       |       |
|------------------------------------|-------|-------|-------|
| Chloromycetin                      | 1.14  | 0.91  | 0.23  |
| Chloroprene                        | 2.03  | 2.28  | -0.25 |
| Chloropropham                      | 3.51  | 3.14  | 0.37  |
| Chloroquine                        | 4.69  | 4.52  | 0.17  |
| Chlorothalonil                     | 2.9   | 3.09  | -0.19 |
| Chlorothiazide                     | -0.24 | -0.85 | 0.61  |
| Chloroxilenol                      | 3.27  | 3.04  | 0.23  |
| Chlorphenamine                     | 3.39  | 3.65  | -0.26 |
| Chlorpromazine                     | 5.19  | 4.99  | 0.20  |
| Chlorpropamide                     | 2.27  | 1.83  | 0.44  |
| Chlorprothixene                    | 6.03  | 5.77  | 0.26  |
| Chlorpyrifos-methyl                | 4.31  | 4.62  | -0.31 |
| Chlorpyrifos                       | 5.27  | 5.48  | -0.21 |
| Chlorsulfuron                      | 1.79  | 1.85  | -0.06 |
| Chlortalidone                      | 0.24  | 0.5   | -0.26 |
| Chlortoluron                       | 2.41  | 2.39  | 0.02  |
| Cimetidine                         | 0.4   | 0.81  | -0.41 |
| Cinnamaldehyde                     | 1.9   | 2.05  | -0.15 |
| Cinnamamide                        | 1.41  | 1.04  | 0.37  |
| Cinnamanilide                      | 3.61  | 3.26  | 0.35  |
| Cinnolin-4-one                     | 0.82  | 1.74  | -0.92 |
| Cinoxate                           | 2.29  | 2.48  | -0.19 |
| Ciprofloxacin                      | -1.08 | -1.05 | -0.03 |
| cis-1,2-Cyclohexyl dinitrate       | 2.97  | 2.75  | 0.22  |
| cis-1,2-Dichloroethylene           | 1.86  | 1.75  | 0.11  |
| cis-1,3-Cyclohexyl dinitrate       | 2.66  | 2.75  | -0.09 |
| cis-1,3-Dichloropropene            | 1.76  | 2.32  | -0.56 |
| cis-2,4,6-Trimethyl-1,3,5-trioxane | 0.67  | 0.82  | -0.15 |
| cis-2-Butene-1,4-diol              | -0.81 | -0.65 | -0.16 |
| cis-2-Hexen-1-ol                   | 1.4   | 1.3   | 0.10  |
| cis-Crotyl alcohol                 | 0.34  | 0.42  | -0.08 |
| Clenbuterol                        | 2.94  | 2.23  | 0.71  |
| Cleocin                            | 2.16  | 1.52  | 0.64  |
| Clobazam                           | 2.12  | 2.41  | -0.29 |
| Clofazimine                        | 7.48  | 6.81  | 0.67  |
| Clofenotane                        | 6.91  | 6.98  | -0.07 |
| Clofibrate                         | 3.65  | 3.44  | 0.21  |
| Clofibric acid                     | 2.57  | 2.68  | -0.11 |
| Clomethiazole                      | 2.12  | 2.12  | 0.00  |
| Clomicalm                          | 5.19  | 5.23  | -0.04 |
| Clonazepam                         | 3.02  | 2.7   | 0.32  |
| Clonidine                          | 1.57  | 2.06  | -0.49 |

|                            |       |       |       |
|----------------------------|-------|-------|-------|
| Clotiazepam                | 3.49  | 3.53  | -0.04 |
| Clotrimazole               | 5.2   | 5.02  | 0.18  |
| Cloxacpen                  | 2.43  | 2.92  | -0.49 |
| Clozapine                  | 3.9   | 3.02  | 0.88  |
| Colamine                   | -1.31 | -1.48 | 0.17  |
| Cordarone                  | 7.8   | 8.31  | -0.51 |
| Coronene                   | 6.7   | 7.21  | -0.51 |
| Cortexolone                | 2.52  | 2.3   | 0.22  |
| Corticosterone             | 1.94  | 2.37  | -0.43 |
| Cortisol                   | 1.61  | 1.26  | 0.35  |
| Cortisone                  | 1.47  | 1.28  | 0.19  |
| Coumarin                   | 1.39  | 2.46  | -1.07 |
| CPMC                       | 1.64  | 1.98  | -0.34 |
| Creatinine                 | -1.76 | -1.25 | -0.51 |
| Cromoglicic acid           | 1.6   | 1     | 0.60  |
| Crotonic acid              | 0.72  | 0.63  | 0.09  |
| Crotoxyphos                | 3.3   | 2.45  | 0.85  |
| Cumene                     | 3.66  | 3.47  | 0.19  |
| Cyanazine                  | 2.22  | 2.04  | 0.18  |
| Cyanoethylene              | 0.25  | 0.52  | -0.27 |
| Cycloheptane               | 4     | 3.46  | 0.54  |
| Cyclohexane                | 3.44  | 3.07  | 0.37  |
| Cyclohexanecarboxylic acid | 1.96  | 1.69  | 0.27  |
| Cyclohexanethiol           | 2.68  | 2.53  | 0.15  |
| Cyclohexanol               | 1.23  | 1.23  | 0.00  |
| Cyclohexanone              | 0.81  | 1.51  | -0.70 |
| Cyclohexanone oxime        | 1.19  | 1.24  | -0.05 |
| Cyclohexene                | 2.86  | 2.67  | 0.19  |
| Cyclohexylamine            | 1.49  | 1.1   | 0.39  |
| Cyclooctane                | 4.45  | 3.85  | 0.60  |
| Cyclooctatetraene          | 3.08  | 2.81  | 0.27  |
| Cyclopentane               | 3     | 2.68  | 0.32  |
| Cyclopentanone             | 0.38  | 1.21  | -0.83 |
| Cyclopropane               | 1.72  | 1.9   | -0.18 |
| Cyclopropylbenzene         | 3.27  | 3.39  | -0.12 |
| Cyclosarin                 | 1.04  | 1.24  | -0.20 |
| Cymperator                 | 6.05  | 6.08  | -0.03 |
| Cytarabine                 | -2.51 | -2.94 | 0.43  |
| Cytosine                   | -1.73 | -1.04 | -0.69 |
| Daraprim                   | 2.87  | 2.58  | 0.29  |
| DDD                        | 6.22  | 6.31  | -0.09 |
| DDE                        | 6.96  | 6.52  | 0.44  |

|                              |       |       |       |
|------------------------------|-------|-------|-------|
| Debrisoquine                 | 0.85  | 1.57  | -0.72 |
| Decabromodiphenyl ether      | 9.97  | 10.36 | -0.39 |
| Decachlorodiphenyl ether     | 8.16  | 9.16  | -1.00 |
| Decamethylcyclopentasiloxane | 8.07  | 8.03  | 0.04  |
| Decane                       | 5.8   | 5.69  | 0.11  |
| Decanedioic acid             | 2.01  | 2.4   | -0.39 |
| Decyl-1,2-dinitrate          | 5.88  | 5.4   | 0.48  |
| Decylbenzene                 | 6.94  | 6.85  | 0.09  |
| DEHP                         | 7.6   | 7.15  | 0.45  |
| delta-Decanolactone          | 2.39  | 3.36  | -0.97 |
| delta-HCH                    | 4.14  | 4.03  | 0.11  |
| Deprenyl                     | 2.9   | 3.05  | -0.15 |
| Desipramine                  | 4     | 4.29  | -0.29 |
| Desmethyldiazepam            | 2.93  | 2.83  | 0.10  |
| Devrinol                     | 3.36  | 3.75  | -0.39 |
| Dexamethasone                | 2.01  | 1.91  | 0.10  |
| Dexamisole                   | 1.94  | 2.46  | -0.52 |
| Dexfenfluramine              | 3.36  | 3.91  | -0.55 |
| Dexindoprofen                | 2.77  | 2.82  | -0.05 |
| Dexsotalol                   | -0.47 | 0.45  | -0.92 |
| Dialifos                     | 4.69  | 4.12  | 0.57  |
| Diallylamine                 | 1.11  | 1.25  | -0.14 |
| Diamylamine                  | 3.76  | 3.45  | 0.31  |
| Dibenz[a,h]anthracene        | 6.5   | 6.67  | -0.17 |
| Dibenz[a,j]anthracene        | 7.11  | 6.67  | 0.44  |
| Dibenzo[b,d]thiophene        | 4.38  | 4.51  | -0.13 |
| Dibenzo[b,e]pyridine         | 3.4   | 3.68  | -0.28 |
| Dibenzofuran                 | 4.12  | 4     | 0.12  |
| Dibenzo-p-dioxin             | 4.38  | 3.99  | 0.39  |
| Dibenzyl ether               | 3.31  | 3.73  | -0.42 |
| Dibenzylamine                | 2.67  | 3.41  | -0.74 |
| Dibutyl adipate              | 3.9   | 4.07  | -0.17 |
| Dibutyl ether                | 3.21  | 2.89  | 0.32  |
| Dibutyl phenyl phosphate     | 4.27  | 4.06  | 0.21  |
| Dibutyl phthalate            | 4.53  | 3.95  | 0.58  |
| Dibutyl suberate             | 4.96  | 4.95  | 0.01  |
| Dibutyl succinate            | 3.6   | 3.19  | 0.41  |
| Dibutylamine                 | 2.68  | 2.57  | 0.11  |
| Dibutylsulfide               | 4.02  | 3.76  | 0.26  |
| Dibutylsulfoxide             | 1.85  | 1.24  | 0.61  |
| Dichlorfenidim               | 2.68  | 2.58  | 0.10  |
| Dichloroacetic acid          | 0.92  | 0.81  | 0.11  |

|                                  |       |       |       |
|----------------------------------|-------|-------|-------|
| Dichloroacetonitrile             | 0.93  | 0.96  | -0.03 |
| Diclofop-methyl                  | 4.8   | 4.96  | -0.16 |
| Dicloxacillin                    | 2.91  | 3.45  | -0.54 |
| Dicyanomethane                   | -0.6  | -0.23 | -0.37 |
| DIDP                             | 7.7   | 8.91  | -1.21 |
| Diethanolamine                   | -1.43 | -1.59 | 0.16  |
| Diethion                         | 5.07  | 5.11  | -0.04 |
| Diethyl 2-butylmalonate          | 3.02  | 2.59  | 0.43  |
| Diethyl 3-oxopimelate            | 1.49  | 1.45  | 0.04  |
| Diethyl 4-oxopimelate            | 1.54  | 1.45  | 0.09  |
| Diethyl acetamidomalonate        | 0.34  | -0.22 | 0.56  |
| Diethyl adipate                  | 1.79  | 2.31  | -0.52 |
| Diethyl allylmalonate            | 2.01  | 1.93  | 0.08  |
| Diethyl benzylidenemalonate      | 3.13  | 2.74  | 0.39  |
| Diethyl chloromalonate           | 1.64  | 1.24  | 0.40  |
| Diethyl decanedioate             | 3.9   | 4.07  | -0.17 |
| Diethyl ethylmalonate            | 1.96  | 1.71  | 0.25  |
| Diethyl isopropylidenemalonate   | 2.66  | 1.85  | 0.81  |
| Diethyl malonate                 | 0.96  | 0.99  | -0.03 |
| Diethyl methylmalonate           | 1.44  | 1.27  | 0.17  |
| Diethyl oxalate                  | 0.56  | 0.55  | 0.01  |
| Diethyl phthalate                | 2.47  | 2.19  | 0.28  |
| Diethyl pimelate                 | 2.31  | 2.75  | -0.44 |
| Diethyl propylmalonate           | 2.49  | 2.15  | 0.34  |
| Diethyl suberate                 | 2.84  | 3.19  | -0.35 |
| Diethyl succinate                | 1.19  | 1.43  | -0.24 |
| Diethyl sulphide                 | 1.95  | 2     | -0.05 |
| Diethylacetaldehyde              | 1.67  | 1.87  | -0.20 |
| Diethylacetamide                 | 0.34  | 0.96  | -0.62 |
| Diethylamine                     | 0.58  | 0.81  | -0.23 |
| Diethylcarbonate                 | 1.21  | 0.81  | 0.40  |
| Diethylene glycol dimethyl ether | -0.36 | -0.01 | -0.35 |
| Diethyleneglycol                 | -1.98 | -1.27 | -0.71 |
| Diethyleneglycol diethyl ether   | 0.39  | 0.85  | -0.46 |
| Diethylketone                    | 0.99  | 1.29  | -0.30 |
| Diethylmethylamine               | 0.95  | 1.22  | -0.27 |
| Diethylstilbestrol               | 5.07  | 5.25  | -0.18 |
| Di flubenzuron                   | 3.88  | 3.46  | 0.42  |
| Di flunisal                      | 4.32  | 3.24  | 1.08  |
| Digitoxin                        | 2.83  | 3.13  | -0.30 |
| Digoxin                          | 1.26  | 1.58  | -0.32 |
| Dihexyl phthalate                | 5.8   | 5.71  | 0.09  |

|                                        |       |       |       |
|----------------------------------------|-------|-------|-------|
| Dihydro-2(3H)-thiophenone              | 0.6   | 0.85  | -0.25 |
| Dihydrocarvone                         | 2.85  | 2.7   | 0.15  |
| Diisoamyl ether                        | 4.25  | 3.45  | 0.80  |
| Diisobutyl phthalate                   | 4.11  | 3.63  | 0.48  |
| Diisobutylamine                        | 2.94  | 2.25  | 0.69  |
| Di-isooctyl phthalate                  | 8     | 7.15  | 0.85  |
| Diisopropyl ether                      | 2     | 2.07  | -0.07 |
| Diisopropyl phthalate                  | 2.83  | 3.13  | -0.30 |
| Diisopropylamine                       | 1.4   | 1.67  | -0.27 |
| Diltiazem                              | 2.7   | 2.98  | -0.28 |
| Dimethoxymethane                       | 0     | 0.16  | -0.16 |
| Dimethyl brassylate                    | 4.43  | 4.53  | -0.10 |
| Dimethyl carbonate                     | 0.23  | -0.05 | 0.28  |
| Dimethyl glutarate                     | 0.62  | 1.01  | -0.39 |
| Dimethyl malonate                      | -0.05 | 0.13  | -0.18 |
| Dimethyl phthalate                     | 1.56  | 1.33  | 0.23  |
| Dimethyl sebacate                      | 2.84  | 3.21  | -0.37 |
| Dimethyl suberate                      | 1.79  | 2.33  | -0.54 |
| Dimethyl succinate                     | 0.35  | 0.57  | -0.22 |
| Dimethyl sulfide                       | 1.77  | 1.44  | 0.33  |
| Dimethyl-(2,2-dichlorovinyl) phosphate | 1.42  | 1.15  | 0.27  |
| Dimethylacetamide                      | -0.7  | -0.14 | -0.56 |
| Dimethylamine                          | -0.38 | -0.29 | -0.09 |
| Dimethylcyanamide                      | -0.15 | 0.32  | -0.47 |
| Dimethylether                          | 0.1   | 0.27  | -0.17 |
| Dimpylate                              | 3.81  | 3.21  | 0.60  |
| Di-n-butylsulfone                      | 1.76  | 1.87  | -0.11 |
| Dinitramine                            | 4.3   | 3.8   | 0.50  |
| Dinoseb                                | 3.56  | 3.58  | -0.02 |
| Di-n-propyl phthalate                  | 3.27  | 3.07  | 0.20  |
| Diphenyl 2-ethylhexyl phosphate        | 5.73  | 5.71  | 0.02  |
| Diphenyl ether                         | 4.21  | 3.86  | 0.35  |
| Diphenyl sulfide                       | 4.45  | 4.37  | 0.08  |
| Diphenylacetic acid                    | 3.05  | 3.47  | -0.42 |
| Diphenylamine                          | 3.5   | 3.54  | -0.04 |
| Diphenylmethane                        | 4.14  | 4.57  | -0.43 |
| Diphenylmethanol                       | 2.67  | 3.01  | -0.34 |
| Diphenylmethylamine                    | 3.16  | 2.88  | 0.28  |
| Diphenylnitrone                        | 1.88  | 2.04  | -0.16 |
| Diphenylsulfone                        | 2.4   | 2.89  | -0.49 |
| Diphenylsulfoxide                      | 2.06  | 2.26  | -0.20 |
| Dipropyl ether                         | 1.93  | 2.01  | -0.08 |

|                               |       |       |       |
|-------------------------------|-------|-------|-------|
| Dipropyl sulfide              | 2.96  | 2.88  | 0.08  |
| Dipropylamine                 | 1.67  | 1.69  | -0.02 |
| Dipropylsulfoxide             | 0.74  | 0.36  | 0.38  |
| Disugran                      | 2.21  | 2.44  | -0.23 |
| Disulfoton                    | 4.02  | 4.02  | 0.00  |
| D-Lyxose                      | -3.02 | -2.93 | -0.09 |
| DMSO                          | -1.35 | -1.08 | -0.27 |
| Dodecamethylcyclohexasiloxane | 8.87  | 9.49  | -0.62 |
| Dodecane                      | 6.8   | 6.75  | 0.05  |
| Dodecanedioic acid            | 3.07  | 3.28  | -0.21 |
| Dolasteron                    | 2.42  | 2.7   | -0.28 |
| Dopa                          | -1.8  | -1.98 | 0.18  |
| Dosulepin                     | 4.49  | 5.01  | -0.52 |
| D-Ribose                      | -2.32 | -2.79 | 0.47  |
| Dronabinol                    | 6.97  | 6.74  | 0.23  |
| Eicosane                      | 10.39 | 10.99 | -0.60 |
| Elaidic acid                  | 6.86  | 6.79  | 0.07  |
| Emodepside                    | 4.9   | 4.99  | -0.09 |
| Enalapril                     | 0.16  | 0.7   | -0.54 |
| Enanthic acid                 | 2.41  | 2.35  | 0.06  |
| Enantholactam                 | 0.24  | 0.89  | -0.65 |
| Endrin                        | 5.2   | 5.33  | -0.13 |
| Enprofylline                  | 0.33  | 0.92  | -0.59 |
| Ephedrine                     | 1.13  | 1.13  | 0.00  |
| Epichlorohydrin               | 0.45  | 0.7   | -0.25 |
| Epiquinine                    | 3.44  | 2.82  | 0.62  |
| Epivir                        | -0.93 | -0.18 | -0.75 |
| epsilon-Aminocaproic acid     | -1.95 | -1.56 | -0.39 |
| epsilon-Caprolactam           | -0.19 | 0.59  | -0.78 |
| epsilon-Caprothiolactam       | 0.75  | 0.92  | -0.17 |
| Eradicane                     | 3.21  | 3.23  | -0.02 |
| Ergonovine                    | 1.67  | 1.57  | 0.10  |
| Esketamine                    | 2.18  | 2.72  | -0.54 |
| Estriol                       | 2.45  | 3.19  | -0.74 |
| Ethalfuralin                  | 4.92  | 4.32  | 0.60  |
| Ethane                        | 1.81  | 1.45  | 0.36  |
| Ethanol                       | -0.32 | -0.06 | -0.26 |
| Ethene                        | 1.13  | 1.27  | -0.14 |
| Ethinyl Estradiol             | 3.42  | 4.1   | -0.68 |
| Ethiofencarb                  | 2.04  | 2.52  | -0.48 |
| Ethoxybenzene                 | 2.51  | 2.59  | -0.08 |
| Ethyl 2,3-dibromobutanoate    | 2.5   | 2.53  | -0.03 |

|                                  |       |      |       |
|----------------------------------|-------|------|-------|
| Ethyl 2,3-dibromopropionate      | 1.98  | 1.86 | 0.12  |
| Ethyl 2-bromo-2-methylpropanoate | 1.8   | 1.77 | 0.03  |
| Ethyl 2-bromo-3-methylbutyrate   | 2.42  | 2.44 | -0.02 |
| Ethyl 2-bromobutyrate            | 2.02  | 2.16 | -0.14 |
| Ethyl 2-bromohexanoate           | 3.08  | 3.04 | 0.04  |
| Ethyl 2-bromooctanoate           | 4.14  | 3.92 | 0.22  |
| Ethyl 2-bromopropionate          | 1.49  | 1.72 | -0.23 |
| Ethyl 2-bromovalerate            | 2.55  | 2.6  | -0.05 |
| Ethyl 2-chloropropionate         | 1.35  | 1.6  | -0.25 |
| Ethyl 2-furancarboxylate         | 1.52  | 1.57 | -0.05 |
| Ethyl 2-methylbutanoate          | 1.59  | 2.07 | -0.48 |
| Ethyl 2-picolinate               | 0.87  | 0.9  | -0.03 |
| Ethyl 3-bromopropionate          | 1.44  | 1.49 | -0.05 |
| Ethyl 3-chloropropionate         | 1.3   | 1.41 | -0.11 |
| Ethyl 4-aminobenzoate            | 1.89  | 1.3  | 0.59  |
| Ethyl 4-bromobutyrate            | 1.62  | 1.93 | -0.31 |
| Ethyl 4-chlorobutyrate           | 1.48  | 1.85 | -0.37 |
| Ethyl 4-hydroxybenzoate          | 2.43  | 1.81 | 0.62  |
| Ethyl 4-pyridinecarboxylate      | 1.43  | 0.86 | 0.57  |
| Ethyl 5-bromovalerate            | 2.15  | 2.37 | -0.22 |
| Ethyl 6-bromohexanoate           | 2.68  | 2.81 | -0.13 |
| Ethyl acetate                    | 0.73  | 0.91 | -0.18 |
| Ethyl acetoacetate               | 0.24  | 0.49 | -0.25 |
| Ethyl acrylate                   | 1.32  | 1.13 | 0.19  |
| Ethyl amyl ether                 | 2.46  | 2.45 | 0.01  |
| Ethyl benzoate                   | 2.64  | 2.21 | 0.43  |
| Ethyl benzoylacetate             | 1.87  | 1.79 | 0.08  |
| Ethyl bromoacetate               | 1.12  | 1.05 | 0.07  |
| Ethyl butanoate                  | 1.73  | 1.79 | -0.06 |
| Ethyl chloroformate              | 0.63  | 0.64 | -0.01 |
| Ethyl cyanoacetate               | 0.02  | 0.38 | -0.36 |
| Ethyl dodecanoate                | 5.71  | 5.31 | 0.40  |
| Ethyl ether                      | 0.89  | 1.13 | -0.24 |
| Ethyl formate                    | 0.26  | 0.37 | -0.11 |
| Ethyl hexanoate                  | 2.83  | 2.67 | 0.16  |
| Ethyl iodide                     | 2     | 2.08 | -0.08 |
| Ethyl isobutanoate               | 1.55  | 1.63 | -0.08 |
| Ethyl isothiocyanate             | 1.47  | 2.23 | -0.76 |
| Ethyl isovalerate                | 2.17  | 2.07 | 0.10  |
| Ethyl lactate                    | -0.18 | 0.05 | -0.23 |
| Ethyl methyl ketone oxime        | 0.65  | 0.58 | 0.07  |
| Ethyl nicotinate                 | 1.32  | 0.86 | 0.46  |

|                         |       |       |       |
|-------------------------|-------|-------|-------|
| Ethyl N-phenylcarbamate | 2.3   | 2.14  | 0.16  |
| Ethyl pentanoate        | 2.3   | 2.23  | 0.07  |
| Ethyl phenylacetate     | 2.42  | 2.65  | -0.23 |
| Ethyl propanoate        | 1.21  | 1.35  | -0.14 |
| Ethyl salicylate        | 2.95  | 2.32  | 0.63  |
| Ethyl thiocyanate       | 1.22  | 1.06  | 0.16  |
| Ethyl trans-cinnamate   | 2.99  | 2.69  | 0.30  |
| Ethyl trichloroacetate  | 2.39  | 2.24  | 0.15  |
| Ethyl vanillin          | 1.58  | 1.53  | 0.05  |
| Ethyl vinyl ether       | 1.04  | 1.34  | -0.30 |
| Ethylamine              | -0.13 | -0.15 | 0.02  |
| Ethylbenzene            | 3.15  | 3.17  | -0.02 |
| Ethylcarbamate          | -0.15 | -0.08 | -0.07 |
| Ethylcarbamide          | -0.74 | -0.49 | -0.25 |
| Ethyldiisopropylamin    | 2.68  | 2.63  | 0.05  |
| Ethyldimethylamine      | 0.7   | 0.67  | 0.03  |
| Ethylenedichloride      | 1.48  | 1.39  | 0.09  |
| Ethylenethiourea        | -0.66 | -0.6  | -0.06 |
| Ethylmethylanine        | 0.15  | 0.26  | -0.11 |
| Ethylnitrate            | 1     | 1.35  | -0.35 |
| Ethynylbenzene          | 2.53  | 2.39  | 0.14  |
| Ethylimol               | 2.22  | 2.4   | -0.18 |
| Etofylline              | -0.49 | -1.07 | 0.58  |
| Etoposide               | 1.97  | 1.29  | 0.68  |
| Exalgin                 | 1.07  | 1.37  | -0.30 |
| Exaltol                 | 4.82  | 3.93  | 0.89  |
| Famotidine              | -0.81 | -0.86 | 0.05  |
| Fenarimol               | 3.6   | 3.2   | 0.40  |
| Fenbufen                | 3.2   | 3.11  | 0.09  |
| Fenchlorphos            | 5.07  | 4.71  | 0.36  |
| Fenchone                | 3.52  | 2.69  | 0.83  |
| Fenoprop                | 3.8   | 3.53  | 0.27  |
| Fenoxycarb              | 4.3   | 3.68  | 0.62  |
| Fenpropathrin           | 6     | 5.26  | 0.74  |
| Fenpropimorph           | 4.93  | 5.07  | -0.14 |
| Fensulfothion           | 2.23  | 2.34  | -0.11 |
| Fenthion                | 4.09  | 3.93  | 0.16  |
| Fenthoate               | 3.69  | 3.76  | -0.07 |
| Fenvalerate             | 6.2   | 6.61  | -0.41 |
| Fimepinostat            | -1.49 | -0.93 | -0.56 |
| Finasteride             | 3.03  | 3.89  | -0.86 |
| Fipronil                | 3.47  | 3.52  | -0.05 |

|                            |       |       |       |
|----------------------------|-------|-------|-------|
| Fleroxacin                 | -0.55 | -0.16 | -0.39 |
| Floxuridine                | -1.38 | -1.78 | 0.40  |
| Fluchloralin               | 4.63  | 4.19  | 0.44  |
| Flucloxacillin             | 2.61  | 2.94  | -0.33 |
| Fluconazole                | 0.5   | 0.73  | -0.23 |
| Fludrocortisone            | 1.67  | 1.75  | -0.08 |
| Flufenamic acid            | 5.25  | 4.2   | 1.05  |
| Flumazenil                 | 1.64  | 1.36  | 0.28  |
| Flumequine                 | 1.72  | 2.22  | -0.50 |
| Flunarizine                | 5.78  | 5.74  | 0.04  |
| Flunitrazepam              | 2.06  | 2.08  | -0.02 |
| Fluometuron                | 2.42  | 2.45  | -0.03 |
| Fluoranthene               | 5.16  | 5.33  | -0.17 |
| Fluorene                   | 4.18  | 4.71  | -0.53 |
| Fluoroacetamide            | -1.05 | -1.3  | 0.25  |
| Fluorobenzene              | 2.27  | 2.25  | 0.02  |
| Flupentixol                | 4.51  | 5.06  | -0.55 |
| Flurbiprofen               | 3.99  | 3.83  | 0.16  |
| Fluridone                  | 2.98  | 3.96  | -0.98 |
| Flutamide                  | 3.35  | 3     | 0.35  |
| Fluvastatin                | 4.17  | 5.13  | -0.96 |
| Fomesafen                  | 3     | 3.2   | -0.20 |
| Formaldehyde diethylacetal | 0.84  | 1.02  | -0.18 |
| Formamide                  | -1.51 | -0.95 | -0.56 |
| Formamidoxime              | -1.64 | -1.26 | -0.38 |
| Formanilide                | 1.15  | 1.27  | -0.12 |
| Formic acid                | -0.54 | -0.39 | -0.15 |
| Formylhydrazine            | -2.05 | -1.24 | -0.81 |
| Ftorafur                   | -0.27 | 0.12  | -0.39 |
| Furan                      | 1.34  | 1.34  | 0.00  |
| Furfural                   | 0.52  | 0.93  | -0.41 |
| Fusaric acid               | 0.68  | 0.41  | 0.27  |
| gamma-Decalactone          | 2.72  | 3.5   | -0.78 |
| gamma-Nonanolactone        | 1.83  | 3.06  | -1.23 |
| Ganciclovir                | -2.07 | -2.03 | -0.04 |
| Gitoxin                    | 1.68  | 1.58  | 0.10  |
| Glycerol trinitrate        | 1.62  | 1.98  | -0.36 |
| Glyceryltriacetate         | 0.25  | 0.66  | -0.41 |
| Glycine                    | -3    | -3.32 | 0.32  |
| Glydiazinamide             | 1.91  | 1.22  | 0.69  |
| Glyme                      | -0.21 | 0.13  | -0.34 |
| Griseofulvin               | 2.18  | 2.43  | -0.25 |

|                             |       |       |       |
|-----------------------------|-------|-------|-------|
| Guajen                      | 4.4   | 4.15  | 0.25  |
| Guanabenz                   | 3.02  | 2.59  | 0.43  |
| Guanidine                   | -1.25 | -1.25 | 0.00  |
| Guanine                     | -0.91 | -0.54 | -0.37 |
| Guanosine                   | -1.89 | -2.44 | 0.55  |
| Harmalol                    | 2.19  | 2.73  | -0.54 |
| Harmony                     | 1.23  | 0.39  | 0.84  |
| Hemimellitene               | 3.55  | 3.43  | 0.12  |
| Heptachlor                  | 5.27  | 6.02  | -0.75 |
| Heptachlor epoxide          | 5.4   | 5.1   | 0.30  |
| Heptadecane                 | 8.79  | 9.4   | -0.61 |
| Heptane                     | 4.66  | 4.1   | 0.56  |
| Heptanedioic acid           | 0.58  | 1.08  | -0.50 |
| Heptanonitrile              | 2.25  | 2.5   | -0.25 |
| Heptanoyl chloride          | 3.52  | 3.48  | 0.04  |
| Heptyl bromide              | 4.36  | 3.61  | 0.75  |
| Heptylbenzene               | 5.37  | 5.47  | -0.10 |
| Hexabromobenzene            | 6.07  | 6.13  | -0.06 |
| Hexachlorobenzene           | 5.73  | 5.41  | 0.32  |
| Hexachlorobutadiene         | 4.78  | 4.77  | 0.01  |
| Hexachloroethane            | 4.14  | 3.93  | 0.21  |
| Hexadecanedioic acid        | 5.7   | 5.04  | 0.66  |
| Hexafluoro-2-propanol       | 1.66  | 1.59  | 0.07  |
| Hexafluorobenzene           | 2.54  | 2.35  | 0.19  |
| Hexamethylbenzene           | 4.61  | 4.51  | 0.10  |
| Hexane                      | 3.8   | 3.57  | 0.23  |
| Hexanenitrile               | 1.66  | 2.06  | -0.40 |
| Hexanoyl chloride           | 2.99  | 3.04  | -0.05 |
| Hexobarbital                | 1.49  | 1.14  | 0.35  |
| Hexyl bromide               | 3.8   | 3.17  | 0.63  |
| Hexyl-1,2-dinitrate         | 3.51  | 3.64  | -0.13 |
| Hexylbenzene                | 5.52  | 5.01  | 0.51  |
| Hexylcarbamate              | 1.85  | 1.68  | 0.17  |
| Hexylisothiocyanate         | 4.01  | 3.99  | 0.02  |
| Hydracrylic acid            | -0.62 | -0.74 | 0.12  |
| Hydrocinnamonitrile         | 1.7   | 2.48  | -0.78 |
| Hydrocinnamyl alcohol       | 1.88  | 2.12  | -0.24 |
| Hydrocortisone hemipimelate | 3.26  | 3.05  | 0.21  |
| Hydroflumethiazide          | 0.54  | 0.46  | 0.08  |
| Hydroxyacetic acid          | -1.11 | -1.18 | 0.07  |
| Hydroxyurea                 | -1.27 | -1.72 | 0.45  |
| Hydroxyzine                 | 3.55  | 2.98  | 0.57  |

|                             |       |       |       |
|-----------------------------|-------|-------|-------|
| Hyoscyamine                 | 1.83  | 2.3   | -0.47 |
| Hypoxanthine                | -1.31 | -0.34 | -0.97 |
| Imazapyr                    | 0.22  | 1.05  | -0.83 |
| Imazaquin                   | 1.86  | 2.45  | -0.59 |
| Imidazole                   | -0.08 | -0.68 | 0.60  |
| Imipramine                  | 4.62  | 4.7   | -0.08 |
| Imiquimod                   | 2.7   | 2.4   | 0.30  |
| Indane                      | 3.18  | 3.59  | -0.41 |
| Indene                      | 2.92  | 3.47  | -0.55 |
| Indinavir                   | 2.92  | 2.83  | 0.09  |
| Indol-3-ylacetic acid       | 1.41  | 1.86  | -0.45 |
| Indole                      | 2.14  | 2.13  | 0.01  |
| Indometacin                 | 3.1   | 4.03  | -0.93 |
| Iodoacetamide               | -0.19 | 0.07  | -0.26 |
| Iodobenzene                 | 3.25  | 3.24  | 0.01  |
| Iohexol                     | -3.05 | -2.04 | -1.01 |
| Iopromide                   | -2.05 | -1.04 | -1.01 |
| Ioversol                    | -2.98 | -2.51 | -0.47 |
| Ioxynil                     | 3.43  | 3.22  | 0.21  |
| Ipronidazole                | 1.06  | 1.59  | -0.53 |
| Isoamyl acetate             | 2.25  | 2.07  | 0.18  |
| Isobutene                   | 2.34  | 1.98  | 0.36  |
| Isobutyl formate            | 1.19  | 1.09  | 0.10  |
| Isobutyl isobutyrate        | 2.48  | 2.35  | 0.13  |
| Isobutyl methyl ketone      | 1.31  | 1.57  | -0.26 |
| Isobutyl propanoate         | 2.17  | 2.07  | 0.10  |
| Isobutylbenzene             | 4.54  | 3.93  | 0.61  |
| Isobutylpropylamine         | 2.07  | 1.97  | 0.10  |
| Isobutyranilide             | 2.02  | 2.2   | -0.18 |
| Isobutyronitrile            | 0.47  | 1.02  | -0.55 |
| Isocarboxazid               | 1.49  | 1.23  | 0.26  |
| Isocumene                   | 3.69  | 3.63  | 0.06  |
| Isodecyl diphenyl phosphate | 5.7   | 6.59  | -0.89 |
| Isohexanoic acid            | 1.75  | 1.75  | 0.00  |
| Isoleucine                  | -1.69 | -1.76 | 0.07  |
| Isoleucinol                 | 0.47  | -0.33 | 0.80  |
| Isoniazid                   | -1.14 | -1.08 | -0.06 |
| Isopentyl alcohol           | 1.16  | 1.1   | 0.06  |
| Isopentyl chloride          | 2.98  | 2.49  | 0.49  |
| Isopentyl propionate        | 2.76  | 2.51  | 0.25  |
| Isopentylamine              | 1.32  | 1.01  | 0.31  |
| Isophthalamide              | -0.21 | -1.11 | 0.90  |

|                      |       |       |       |
|----------------------|-------|-------|-------|
| Isophthalic acid     | 1.66  | 0.52  | 1.14  |
| Isoprene             | 2.42  | 2.22  | 0.20  |
| Isopropanolamine     | -0.96 | -1.01 | 0.05  |
| Isopropenylacetate   | 1.07  | 1.52  | -0.45 |
| Isopropylacetate     | 1.02  | 1.38  | -0.36 |
| Isopropylamine       | 0.26  | 0.28  | -0.02 |
| Isopropylnitrate     | 1.66  | 1.82  | -0.16 |
| Isoproturon          | 2.87  | 2.58  | 0.29  |
| Isoquinoline         | 2.08  | 1.88  | 0.20  |
| Isosorbide           | -1.31 | -1.87 | 0.56  |
| Isosorbide 5-nitrate | -0.4  | -0.72 | 0.32  |
| Isotretinoin         | 6.3   | 5.63  | 0.67  |
| Isovaleronitrile     | 1.12  | 1.46  | -0.34 |
| Isoxazole            | 0.08  | -0.8  | 0.88  |
| Isoxicam             | 2.83  | 3.56  | -0.73 |
| Kappa-bifenthrin     | 6.27  | 7.39  | -1.12 |
| Kentanserin          | 3.01  | 2.5   | 0.51  |
| Kepone               | 5.44  | 5.43  | 0.01  |
| Ketoconazole         | 4.34  | 3.88  | 0.46  |
| Ketoprofen           | 3.16  | 2.95  | 0.21  |
| Labetalol            | 3.09  | 2.74  | 0.35  |
| Lacidipine           | 5.56  | 6.06  | -0.50 |
| Lactic acid          | -0.72 | -0.71 | -0.01 |
| Lactonitrile         | -0.94 | -0.56 | -0.38 |
| lambda-Cyhalothrin   | 7     | 6.54  | 0.46  |
| Latamoxef            | -0.58 | -0.72 | 0.14  |
| Lauric acid          | 4.2   | 4.55  | -0.35 |
| Lauroitrile          | 4.9   | 4.7   | 0.20  |
| Lawsone              | 1.38  | 0.81  | 0.57  |
| Leucine              | -1.57 | -1.76 | 0.19  |
| Levalbuterol         | 1.4   | 1.46  | -0.06 |
| Levobetaxolol        | 2.81  | 2.98  | -0.17 |
| Levofloxacin         | -0.28 | 0.72  | -1.00 |
| Levomoprolol         | 1.69  | 1.63  | 0.06  |
| Levopropicillin      | 2.65  | 2.39  | 0.26  |
| Levopropoxyphene     | 4.4   | 5.19  | -0.79 |
| Lidoflazine          | 5.6   | 6.02  | -0.42 |
| Lignocaine           | 2.9   | 2.66  | 0.24  |
| Lincomycin           | 0.2   | 0.23  | -0.03 |
| Lindane              | 3.55  | 4.03  | -0.48 |
| Linuron              | 3.2   | 3     | 0.20  |
| L-Menthone           | 3.05  | 2.79  | 0.26  |

|                          |       |       |       |
|--------------------------|-------|-------|-------|
| Lomefloxacin             | -0.8  | -0.98 | 0.18  |
| Lomustine                | 2.83  | 2.56  | 0.27  |
| Loratadine               | 5.2   | 5.4   | -0.20 |
| Lormetazepam             | 2.38  | 3.13  | -0.75 |
| Lysine                   | -2.82 | -3.02 | 0.20  |
| Malic acid               | -1.26 | -1.03 | -0.23 |
| Mandelic acid            | 0.62  | 0.59  | 0.03  |
| Mandelic acid ethylester | 0.91  | 1.35  | -0.44 |
| m-Anisic acid            | 2.02  | 1.38  | 0.64  |
| m-Anisidine              | 0.93  | 1.25  | -0.32 |
| m-Anthranilic acid       | 0.34  | 0.54  | -0.20 |
| MCPB                     | 3.43  | 3.22  | 0.21  |
| m-Cresol                 | 1.98  | 2.17  | -0.19 |
| m-Cresylacetate          | 2.09  | 2.52  | -0.43 |
| m-Diacetamidobenzene     | 0.5   | 0.73  | -0.23 |
| Mebendazole              | 2.83  | 2.23  | 0.60  |
| Mecoprop                 | 3.13  | 2.81  | 0.32  |
| Medazepam                | 4.05  | 3.54  | 0.51  |
| Mefoxine                 | -0.02 | 0.39  | -0.41 |
| Meloxicam                | 3.01  | 2.81  | 0.20  |
| Memantine                | 3.28  | 2.9   | 0.38  |
| Menthol                  | 3.4   | 2.51  | 0.89  |
| Mephenamic acid          | 4.2   | 3.95  | 0.25  |
| Mephenate                | 2.01  | 1.98  | 0.03  |
| Mephenesin               | 1.41  | 1     | 0.41  |
| Mepindolol               | 2.3   | 2.71  | -0.41 |
| Meproamate               | 0.7   | 0.53  | 0.17  |
| Mepyramine               | 3.27  | 3.14  | 0.13  |
| Mercaptoacetic acid      | 0.09  | 0.2   | -0.11 |
| Mercaptodimethur         | 2.92  | 2.6   | 0.32  |
| Mescaline                | 0.78  | 1.38  | -0.60 |
| Mesitol                  | 2.73  | 2.85  | -0.12 |
| Mesoridazine             | 3.05  | 3.74  | -0.69 |
| Metalaxyl                | 1.65  | 1.67  | -0.02 |
| Metaxone                 | 2.69  | 2.34  | 0.35  |
| Methadone                | 3.93  | 4.8   | -0.87 |
| Methanol                 | -0.77 | -0.49 | -0.28 |
| Methaqualone             | 2.5   | 2.77  | -0.27 |
| Methicillin              | 1.3   | 1.83  | -0.53 |
| Methomyl                 | 0.6   | 1.01  | -0.41 |
| Methotrimeprazine        | 4.68  | 4.67  | 0.01  |
| Methoxychlor             | 5.08  | 5.78  | -0.70 |

|                                   |       |       |       |
|-----------------------------------|-------|-------|-------|
| Methoxytetrachlorocyclohexane     | 2.99  | 2.99  | 0.00  |
| Methyl (Z) 9-octadecenoate        | 7.45  | 7.12  | 0.33  |
| Methyl 2-hydroxybenzoate          | 2.46  | 1.89  | 0.57  |
| Methyl 2-methoxybenzoate          | 2.04  | 1.71  | 0.33  |
| Methyl 2-methylbutyrate           | 1.55  | 1.64  | -0.09 |
| Methyl 4-hydroxybenzoate          | 1.96  | 1.38  | 0.58  |
| Methyl 5-bromovalerate            | 1.62  | 1.94  | -0.32 |
| Methyl acetate                    | 0.18  | 0.48  | -0.30 |
| Methyl acrylate                   | 0.8   | 0.7   | 0.10  |
| Methyl benzoate                   | 2.12  | 1.78  | 0.34  |
| Methyl carbamate                  | -0.66 | -0.51 | -0.15 |
| Methyl cellosolve                 | -0.77 | -0.63 | -0.14 |
| Methyl chlorocarbonate            | 0.14  | 0.21  | -0.07 |
| Methyl decanoate                  | 4.41  | 4     | 0.41  |
| Methyl formate                    | 0.03  | -0.06 | 0.09  |
| Methyl hexanoate                  | 2.3   | 2.24  | 0.06  |
| Methyl hydrocinnamate             | 2.32  | 2.66  | -0.34 |
| Methyl isoamyl ketone             | 1.88  | 2.01  | -0.13 |
| Methyl isonicotinate              | 0.87  | 0.43  | 0.44  |
| Methyl laurate                    | 5.41  | 4.88  | 0.53  |
| Methyl levulinate                 | -0.13 | 0.5   | -0.63 |
| Methyl methacrylate               | 1.38  | 1.11  | 0.27  |
| Methyl nicotinate                 | 0.81  | 0.43  | 0.38  |
| Methyl N-methylcarbamate          | -0.06 | -0.25 | 0.19  |
| Methyl nonanoate                  | 3.88  | 3.56  | 0.32  |
| Methyl octanoate                  | 3.36  | 3.12  | 0.24  |
| Methyl phenylacetate              | 1.83  | 2.22  | -0.39 |
| Methyl propanoate                 | 0.84  | 0.92  | -0.08 |
| Methyl trans-3-pentenoate         | 1.28  | 1.4   | -0.12 |
| Methyl trans-cinnamate            | 2.62  | 2.26  | 0.36  |
| Methyl trichloroacetate           | 2.03  | 1.81  | 0.22  |
| Methyl trifluoroacetate           | 0.6   | 1.07  | -0.47 |
| Methyl undecanoate                | 4.79  | 4.44  | 0.35  |
| Methyl valerate                   | 1.96  | 1.8   | 0.16  |
| Methyl Z,Z-9,12-octadecadieneoate | 6.82  | 6.72  | 0.10  |
| Methylacetamide                   | -1.05 | -0.48 | -0.57 |
| Methylamine                       | -0.57 | -0.7  | 0.13  |
| Methylbenzene                     | 2.73  | 2.71  | 0.02  |
| Methylchloroacetate               | 0.63  | 0.54  | 0.09  |
| Methylchloroform                  | 2.49  | 2.6   | -0.11 |
| Methylcyclohexane                 | 3.88  | 3.44  | 0.44  |
| Methylcyclopentane                | 3.37  | 3.05  | 0.32  |

|                                                          |       |       |       |
|----------------------------------------------------------|-------|-------|-------|
| Methylenanthate                                          | 2.83  | 2.68  | 0.15  |
| Methylhippurate                                          | 0.82  | 0.58  | 0.24  |
| Methylhydrazine                                          | -1.05 | -1.08 | 0.03  |
| Methylnitrophos                                          | 3.3   | 3.33  | -0.03 |
| Methyl-n-propylketone                                    | 0.91  | 1.29  | -0.38 |
| Methyloxiran                                             | 0.03  | 0.64  | -0.61 |
| Methylparathion                                          | 2.86  | 2.99  | -0.13 |
| Methylpentachlorocyclohexane                             | 4.04  | 4.06  | -0.02 |
| Methylphenobarbital                                      | 1.84  | 1.19  | 0.65  |
| Methylphenylsulfone                                      | 0.47  | 1.22  | -0.75 |
| Methylphenylsulfoxide                                    | 0.55  | 0.59  | -0.04 |
| Methylthiocyanate                                        | 0.73  | 0.78  | -0.05 |
| Methylthiopentachlorocyclohexane                         | 3.75  | 4.18  | -0.43 |
| Methyltriazothion                                        | 2.75  | 2.79  | -0.04 |
| Metolachlor                                              | 3.13  | 2.96  | 0.17  |
| Metolcarb                                                | 1.7   | 1.79  | -0.09 |
| Metoprolol                                               | 2.34  | 1.91  | 0.43  |
| Metosulam                                                | 2.5   | 2.88  | -0.38 |
| Metribuzin                                               | 1.58  | 1.48  | 0.10  |
| Metronidazol                                             | -0.1  | 0.09  | -0.19 |
| Mevinphos                                                | 1.2   | 0.25  | 0.95  |
| Mexiletine                                               | 2.15  | 2.28  | -0.13 |
| Midazolam                                                | 3.27  | 3.73  | -0.46 |
| Molinate                                                 | 3.21  | 2.59  | 0.62  |
| Monacolin K                                              | 4.26  | 5.36  | -1.10 |
| Monocrotophos                                            | -0.2  | -0.71 | 0.51  |
| Monolinuron                                              | 2.3   | 2.47  | -0.17 |
| Moracizine                                               | 2.98  | 2.81  | 0.17  |
| Morpholine                                               | -0.86 | -0.71 | -0.15 |
| MTBE                                                     | 1.05  | 1.38  | -0.33 |
| m-Toluamide                                              | 1.18  | 0.9   | 0.28  |
| m-Toluidine                                              | 1.4   | 1.66  | -0.26 |
| m-Tolyl N,N-dimethylcarbamate                            | 2.05  | 2.13  | -0.08 |
| Mustard oil                                              | 1.94  | 2.45  | -0.51 |
| N-(2,6-dichlorophenylmethylene)benzenamine N-oxide       | 2.61  | 3.1   | -0.49 |
| N-(2-Chloroethyl)-N'-(4-hydroxycyclohexyl)-N-nitrosoarea | 1.05  | 1.26  | -0.21 |
| N-(2-Chloroethyl)-N-nitrosoarea                          | 0.57  | 0.5   | 0.07  |
| N-(2-Methoxyphenyl)sulfanilamide                         | 1.56  | 1.69  | -0.13 |
| N-(2-Norbornyl)-N'-(2-chloroethyl)-N'-nitrosoarea        | 2.98  | 2.74  | 0.24  |
| N-(3,4-Dichlorophenyl)-N'-phenylurea                     | 4.7   | 4.2   | 0.50  |
| N-(3,5-Dibromo-2-pyridyl)sulfanilamide                   | 2.74  | 2.55  | 0.19  |
| N-(3,5-Dichloro-2-pyridyl)sulfanilamide                  | 1.97  | 2.31  | -0.34 |

|                                                   |       |       |       |
|---------------------------------------------------|-------|-------|-------|
| N-(3-Bromo-2-pyridyl)sulfanilamide                | 1.24  | 1.9   | -0.66 |
| N-(4-Isopropylphenylmethylene)benzenamine N-oxide | 3.37  | 3.1   | 0.27  |
| N-(4-Methoxyphenyl)sulfanilamide                  | 1.51  | 1.69  | -0.18 |
| N-(4-Methoxyphenylmethylene)benzenamine N-oxide   | 1.94  | 1.97  | -0.03 |
| N-(4-Methylbenzylidene)aniline N-oxide            | 2.41  | 2.38  | 0.03  |
| N,N'-Diacetylurea                                 | -0.68 | -0.47 | -0.21 |
| N,N-Diallylurea                                   | 0.64  | 0.84  | -0.20 |
| N,N'-Dibutylurea                                  | 1.4   | 2.08  | -0.68 |
| N,N-Diethylaniline                                | 3.31  | 3.02  | 0.29  |
| N,N-Diethyl-N'-methyl-N'-nitrosourea              | 1.11  | 1.08  | 0.03  |
| N,N-Dimethyl-2-anisidine                          | 1.63  | 1.85  | -0.22 |
| N,N-Dimethyl-2-methoxybenzamide                   | 0.71  | 1.09  | -0.38 |
| N,N-Dimethyl-3-methoxybenzamide                   | 1     | 1.09  | -0.09 |
| N,N-Dimethyl-3-toluidine                          | 2.8   | 2.26  | 0.54  |
| N,N-Dimethyl-4-methoxybenzamide                   | 0.96  | 1.09  | -0.13 |
| N,N-Dimethylaniline                               | 2.31  | 1.92  | 0.39  |
| N,N-Dimethylbenzamide                             | 0.62  | 1.16  | -0.54 |
| N,N-Dimethylbenzenesulfonamide                    | 1.35  | 0.87  | 0.48  |
| N,N-Dimethylformamide                             | -0.74 | -0.35 | -0.39 |
| N,N-Dimethyl-N'-(3-chlorophenyl)urea              | 2     | 2.05  | -0.05 |
| N,N-Dimethyl-N'-(4-bromophenyl)urea               | 2.19  | 2.17  | 0.02  |
| N,N-Dimethyl-N'-(4-nitrophenyl)urea               | 1.51  | 1.39  | 0.12  |
| N,N-Dimethyl-N'-(4-tolyl)urea                     | 1.98  | 1.86  | 0.12  |
| N,N-Dimethyl-N',N'-diphenylurea                   | 2.8   | 2.88  | -0.08 |
| N,N'-Dimethyl-N-phenylurea                        | 1.02  | 1.07  | -0.05 |
| N,N-Dimethylphenoxyacetamide                      | 0.77  | 1.18  | -0.41 |
| N,N-Dimethylpropionamide                          | -0.11 | 0.3   | -0.41 |
| N,N-Dimethyl-p-toluidine                          | 2.61  | 2.26  | 0.35  |
| N,N'-Dinitrosopiperazine                          | -0.85 | -0.93 | 0.08  |
| N-Acetylanthranilic acid                          | 1.88  | 1.21  | 0.67  |
| Nadolol                                           | 0.71  | 1.5   | -0.79 |
| Nalidixic acid                                    | 1.59  | 1.38  | 0.21  |
| Naloxone                                          | 2.09  | 2.12  | -0.03 |
| Naphthalene                                       | 3.35  | 3.43  | -0.08 |
| n-Butyl acetate                                   | 1.7   | 1.79  | -0.09 |
| n-Butyl acrylate                                  | 2.36  | 2.01  | 0.35  |
| n-Butylcarbamate                                  | 0.85  | 0.8   | 0.05  |
| n-Butylformate                                    | 1.32  | 1.25  | 0.07  |
| n-Butylurea                                       | 0.41  | 0.39  | 0.02  |
| N-Cyano-2-(3,3-dimethyl-1-triazenyl)-benzamide    | 0.8   | -0.07 | 0.87  |
| n-Decanoic acid                                   | 4.09  | 3.67  | 0.42  |
| n-Decylacetate                                    | 4.94  | 4.43  | 0.51  |

|                                            |       |       |       |
|--------------------------------------------|-------|-------|-------|
| n-Decylamine                               | 4.1   | 3.37  | 0.73  |
| n-Dodecanal                                | 5.07  | 4.67  | 0.40  |
| Nebivolol                                  | 4.04  | 3.49  | 0.55  |
| Neburea                                    | 3.8   | 4.01  | -0.21 |
| Necrostatin-1                              | 0.63  | 1.06  | -0.43 |
| Nedocromil                                 | 2.22  | 1.82  | 0.40  |
| Neohexane                                  | 3.82  | 3.33  | 0.49  |
| Neopentyl alcohol                          | 1.36  | 1.02  | 0.34  |
| N-Ethylaniline                             | 2.16  | 2.13  | 0.03  |
| N-Ethylbromoacetamide                      | 0.34  | 0.21  | 0.13  |
| N-Ethyl-N'-phenylurea                      | 1.64  | 1.73  | -0.09 |
| Neurontin                                  | -1.25 | -0.98 | -0.27 |
| Nevirapine                                 | 2.41  | 2.7   | -0.29 |
| n-Heptaldehyde                             | 1.99  | 2.47  | -0.48 |
| n-Heptylamine                              | 2.57  | 2.05  | 0.52  |
| n-Hexanoic acid                            | 1.92  | 1.91  | 0.01  |
| n-Hexylacetate                             | 2.83  | 2.67  | 0.16  |
| n-Hexylamine                               | 2.06  | 1.61  | 0.45  |
| n-Hexylformate                             | 2.38  | 2.13  | 0.25  |
| N-Hydroxyacetamide                         | -1.54 | -1.16 | -0.38 |
| N-Hydroxy-N'-butylurea                     | 0.32  | -0.03 | 0.35  |
| N-Hydroxy-N'-propylurea                    | -0.22 | -0.47 | 0.25  |
| Nicosulfuron                               | 0.5   | 0.83  | -0.33 |
| Niflumic acid                              | 4.43  | 3.69  | 0.74  |
| Nimesulide                                 | 2.6   | 2.5   | 0.10  |
| Nimorazole                                 | 0.07  | -0.17 | 0.24  |
| Ninhydrin                                  | 0.65  | 0.64  | 0.01  |
| Nitrazepam                                 | 2.12  | 2.17  | -0.05 |
| Nitrobenzene                               | 1.85  | 2.1   | -0.25 |
| Nitroethane                                | 0.18  | 0.41  | -0.23 |
| Nitroethylene                              | 0.01  | 0.65  | -0.64 |
| Nitrofungin                                | 2.33  | 2.23  | 0.10  |
| Nitromide                                  | 0.83  | 0.3   | 0.53  |
| Nitrophenylmethane                         | 1.75  | 1.71  | 0.04  |
| N-Maleoyl-3-aminopropionic acid ethylester | 0.41  | -0.12 | 0.53  |
| N-Methyl-2-pyrrolidone                     | -0.38 | 0.33  | -0.71 |
| N-Methyl-2-quinolone                       | 1.45  | 1.65  | -0.20 |
| N-Methyl-3,5-dimethylphenyl carbamate      | 2.23  | 2.13  | 0.10  |
| N-Methyl-4-nitroaniline                    | 2.04  | 1.45  | 0.59  |
| N-Methylaniline                            | 1.7   | 1.58  | 0.12  |
| N-Methylformamide                          | -0.97 | -0.69 | -0.28 |
| N-Methylformanilide                        | 1.09  | 1.16  | -0.07 |

|                           |       |       |       |
|---------------------------|-------|-------|-------|
| N-Methylmorpholine        | -0.33 | -0.3  | -0.03 |
| N-Methyl-N-benzylaniline  | 4.22  | 3.29  | 0.93  |
| N-Methyl-N-nitrosourea    | -0.1  | -0.11 | 0.01  |
| N-Methyl-N-phenylthiourea | 0.85  | 0.85  | 0.00  |
| N-Methyl-o-toluidine      | 2.16  | 1.92  | 0.24  |
| N-Methylpiperidine        | 1.3   | 1.16  | 0.14  |
| N-Methylpropargylamine    | 0.08  | -0.08 | 0.16  |
| N-Methylpropylamine       | 0.84  | 0.7   | 0.14  |
| N-Methyl-p-toluidine      | 2.15  | 1.92  | 0.23  |
| N-Nitroso-4-piperidone    | -0.47 | -0.22 | -0.25 |
| N-Nitrosodibutylamine     | 1.92  | 2.62  | -0.70 |
| N-Nitrosodiethanolamine   | -1.51 | -1.54 | 0.03  |
| N-Nitrosodiethylamine     | 0.48  | 0.86  | -0.38 |
| N-Nitrosodiisopropylamine | 1.63  | 1.72  | -0.09 |
| N-Nitrosodimethylamine    | -0.57 | -0.24 | -0.33 |
| N-Nitrosodiphenylamine    | 3.13  | 3.73  | -0.60 |
| N-Nitrosodipropylamine    | 1.36  | 1.74  | -0.38 |
| N-Nitrosomorpholine       | -0.44 | -0.66 | 0.22  |
| N-Nitrosopiperidine       | 0.63  | 0.8   | -0.17 |
| N-Nitrosopyrrolidone      | -0.19 | 0.41  | -0.60 |
| N-Nitrosothiomorpholine   | 0.4   | 0.21  | 0.19  |
| N-Nitrosotriethylurea     | 1.54  | 1.63  | -0.09 |
| N-Nitrosotrimethylurea    | 0.36  | -0.02 | 0.38  |
| n-Nonanal                 | 3.48  | 3.35  | 0.13  |
| n-Nonylamine              | 3.57  | 2.93  | 0.64  |
| n-Octanoic acid           | 3.05  | 2.79  | 0.26  |
| n-Octylacetate            | 3.88  | 3.55  | 0.33  |
| n-Octylamine              | 3.04  | 2.49  | 0.55  |
| Nonane                    | 5.65  | 5.16  | 0.49  |
| Nonanedioic acid          | 1.57  | 1.96  | -0.39 |
| Nonylbenzene              | 6.41  | 6.39  | 0.02  |
| Nopinene                  | 4.16  | 4.02  | 0.14  |
| Norethisterone            | 2.97  | 3.53  | -0.56 |
| Norfloxacin               | -1.03 | -1.4  | 0.37  |
| Norflurazon               | 2.3   | 1.46  | 0.84  |
| Nortriptyline             | 4.04  | 5.07  | -1.03 |
| N-Phenylanthranilic acid  | 4.36  | 3.27  | 1.09  |
| N-Phenylglycine           | 0.62  | 1.01  | -0.39 |
| N-Phenylhydroxylamine     | 0.79  | 0.9   | -0.11 |
| N-Phenylmorpholine        | 1.36  | 1.5   | -0.14 |
| N-Phenylpiperidine        | 2.78  | 2.96  | -0.18 |
| N-Phenylsulfamide         | 0.4   | 0.61  | -0.21 |

|                                                                               |       |       |       |
|-------------------------------------------------------------------------------|-------|-------|-------|
| n-Propyl acetate                                                              | 1.24  | 1.35  | -0.11 |
| n-Propyl benzoate                                                             | 3.01  | 2.65  | 0.36  |
| N-Propylaniline                                                               | 2.45  | 2.57  | -0.12 |
| n-Propylformate                                                               | 0.83  | 0.81  | 0.02  |
| N-p-Tolylsulfanilamide                                                        | 1.56  | 2.1   | -0.54 |
| N-Salicylideneaniline                                                         | 1.55  | 1.35  | 0.20  |
| n-Undecanoic acid                                                             | 4.53  | 4.11  | 0.42  |
| n-Undecylamine                                                                | 4.63  | 3.81  | 0.82  |
| n-Valeraldehyde                                                               | 1.36  | 1.59  | -0.23 |
| O,O'-Diethyl-O''-(benzothien-3-yl)glyoxylonitrile oximino phosphate           | 0.56  | 0.21  | 0.35  |
| O,O'-Diethyl-O''-3,4-dimethoxyphenylglyoxylonitrile oximino thiophosphate     | -0.19 | 0.54  | -0.73 |
| O,O'-Diethyl-O''-4-chlorophenylglyoxylonitrile oximino thiophosphate          | 0.47  | 1.21  | -0.74 |
| O,O'-Diethyl-O''-4-fluorophenylglyoxylonitrile oximino thiophosphate          | 0.35  | 0.7   | -0.35 |
| O,O-Diethyl-O-phenylphosphate                                                 | 1.34  | 2.3   | -0.96 |
| O,O'-Diisopropyl-O''-(benzothien-3-yl)glyoxylonitrile oximino phosphate       | 1.56  | 1.15  | 0.41  |
| O,O'-Diisopropyl-O''-3,4-dimethoxyphenylglyoxylonitrile oximino phosphate     | -0.38 | -0.2  | -0.18 |
| O,O'-Diisopropyl-O''-3,4-dimethoxyphenylglyoxylonitrile oximino thiophosphate | 0.47  | 1.48  | -1.01 |
| O,O'-Diisopropyl-O''-4-chlorophenylglyoxylonitrile oximino phosphate          | -0.2  | 0.47  | -0.67 |
| O,O'-Diisopropyl-O''-4-fluorophenylglyoxylonitrile oximino phosphate          | -0.43 | -0.04 | -0.39 |
| O,O'-Diisopropyl-O''-phenylglyoxylonitrile oximino phosphate                  | 0.06  | -0.06 | 0.12  |
| O,O'-Diisopropyl-O''-phenylglyoxylonitrile oximino thiophosphate              | 2.07  | 1.62  | 0.45  |
| O,O'-Dimethyl-O''-(benzothien-3-yl)glyoxylonitrile oximino thiophosphate      | 1.94  | 1.03  | 0.91  |
| O,O'-Dimethyl-O''-4-fluorophenylglyoxylonitrile oximino phosphate             | -1.08 | -1.84 | 0.76  |
| O,O'-Dimethyl-O''-phenylglyoxylonitrile oximino phosphate                     | -1.01 | -1.86 | 0.85  |
| o-Anisic acid                                                                 | 1.59  | 1.89  | -0.30 |
| o-Anthranilic acid                                                            | 1.26  | 1.05  | 0.21  |
| o-Cresol                                                                      | 1.98  | 2.17  | -0.19 |
| o-Cresylacetate                                                               | 2.11  | 2.52  | -0.41 |
| Octachlorodibenzo-p-dioxin                                                    | 8.6   | 8.23  | 0.37  |
| Octachloronaphthalene                                                         | 7.7   | 7.47  | 0.23  |
| Octachlorostyrene                                                             | 6.29  | 6.97  | -0.68 |
| Octadecane                                                                    | 9.32  | 9.93  | -0.61 |
| Octamethylcyclotetrasiloxane                                                  | 6.98  | 6.57  | 0.41  |
| Octane                                                                        | 5.18  | 4.63  | 0.55  |

|                               |       |       |       |
|-------------------------------|-------|-------|-------|
| Octanedioic acid              | 1.14  | 1.52  | -0.38 |
| Octanoyl chloride             | 4.05  | 3.92  | 0.13  |
| Octyl-1,2-dinitrate           | 4.63  | 4.52  | 0.11  |
| Octylbenzene                  | 6.3   | 5.93  | 0.37  |
| Octylcyanide                  | 3.12  | 3.38  | -0.26 |
| o-Cumenol                     | 2.88  | 2.89  | -0.01 |
| Optipranolol                  | 2.28  | 2.67  | -0.39 |
| Ornidazole                    | 0.6   | 0.62  | -0.02 |
| Ornithine                     | -4.41 | -3.46 | -0.95 |
| Orphenadrine                  | 3.77  | 3.94  | -0.17 |
| o-Toluidine                   | 1.43  | 1.66  | -0.23 |
| o-Tolyl N,N-dimethylcarbamate | 1.86  | 2.13  | -0.27 |
| Oxacillin                     | 2.38  | 2.39  | -0.01 |
| Oxamniquine                   | 2.24  | 1.67  | 0.57  |
| Oxasulfuron                   | 1.1   | 0.58  | 0.52  |
| Oxazepam                      | 2.17  | 2.6   | -0.43 |
| Oxirane                       | -0.3  | 0.17  | -0.47 |
| Oxprenolol                    | 2.1   | 2.28  | -0.18 |
| Oxycarboxin                   | 0.74  | 0.62  | 0.12  |
| Oxyphenbutazone               | 2.72  | 2.79  | -0.07 |
| p-Anthranilic acid            | 0.86  | 0.54  | 0.32  |
| Papaverine                    | 2.95  | 3.72  | -0.77 |
| Paracetamol                   | 0.34  | 1.08  | -0.74 |
| Paspertin                     | 2.62  | 1.93  | 0.69  |
| p-Benzidine                   | 1.34  | 2.05  | -0.71 |
| PBN                           | 1.22  | 1.32  | -0.10 |
| PCNB                          | 4.64  | 4.75  | -0.11 |
| p-Cresol                      | 1.97  | 2.17  | -0.20 |
| p-Cresyl diphenyl phosphate   | 4.4   | 4.5   | -0.10 |
| p-Cymene                      | 4.1   | 3.83  | 0.27  |
| Pebulate                      | 3.84  | 3.67  | 0.17  |
| Pefloxacin                    | 0.27  | 0.89  | -0.62 |
| Pelargonic acid               | 3.47  | 3.23  | 0.24  |
| Penbutolol                    | 4.15  | 3.68  | 0.47  |
| Penconazole                   | 3.4   | 4.36  | -0.96 |
| Penoxalin                     | 5.18  | 4.37  | 0.81  |
| Pentachloroanisole            | 5.45  | 4.81  | 0.64  |
| Pentachlorobenzene            | 5.17  | 4.88  | 0.29  |
| Pentachlorobenzimidazole      | 4.53  | 4.57  | -0.04 |
| Pentachloroethane             | 3.22  | 3.26  | -0.04 |
| Pentachlorophenol             | 5.12  | 4.48  | 0.64  |
| Pentachloropyridine           | 3.53  | 3.77  | -0.24 |

|                              |       |      |       |
|------------------------------|-------|------|-------|
| Pentadecane                  | 7.72  | 8.34 | -0.62 |
| Pentafluorobenzene           | 2.53  | 2.33 | 0.20  |
| Pentafluorothiophenol        | 1.56  | 2.3  | -0.74 |
| Pentamethylbenzene           | 4.56  | 4.15 | 0.41  |
| Pentane                      | 3.39  | 3.04 | 0.35  |
| Pentanedioic acid            | -0.29 | 0.2  | -0.49 |
| Pentanenitrile               | 1.12  | 1.62 | -0.50 |
| Pentanoic acid               | 1.39  | 1.47 | -0.08 |
| Pentobarbital                | 1.4   | 1.6  | -0.20 |
| Pentoxifylline               | 0.72  | 0.72 | 0.00  |
| Pentyl benzoate              | 3.79  | 3.53 | 0.26  |
| Pentyl-1,2-dinitrate         | 2.94  | 3.2  | -0.26 |
| Pentylcarbamate              | 1.35  | 1.24 | 0.11  |
| Peonol                       | 1.98  | 1.75 | 0.23  |
| Perazine                     | 3.9   | 4.13 | -0.23 |
| Perchlorobiphenyl            | 8.27  | 9.17 | -0.90 |
| Perchlorocyclopentadiene     | 5.04  | 4.81 | 0.23  |
| Peridol                      | 4.3   | 3.79 | 0.51  |
| Perphenazine                 | 4.2   | 3.88 | 0.32  |
| Pervitin                     | 2.07  | 2.43 | -0.36 |
| Perylene                     | 5.82  | 6.13 | -0.31 |
| Pethidine                    | 2.45  | 2.74 | -0.29 |
| Phenacemide                  | 0.87  | 1.11 | -0.24 |
| Phenanthrene                 | 4.56  | 4.51 | 0.05  |
| Phenanthrene-9,10-dione      | 2.52  | 2.29 | 0.23  |
| Phenazine                    | 2.84  | 3.13 | -0.29 |
| Phenethyl acetate            | 2.42  | 2.65 | -0.23 |
| Phenethyl alcohol            | 1.42  | 1.68 | -0.26 |
| Pheneticillin                | 2.28  | 1.95 | 0.33  |
| Phenindione                  | 2.9   | 2.67 | 0.23  |
| Phenobarbital                | 1.47  | 2.16 | -0.69 |
| Phenol                       | 1.5   | 1.83 | -0.33 |
| Phenolphthalol               | 3.27  | 4.1  | -0.83 |
| Phenothiazine                | 3.78  | 4.18 | -0.40 |
| Phenoxyacetamide             | 0.76  | 0.58 | 0.18  |
| Phenoxyacetic acid           | 1.34  | 1.47 | -0.13 |
| Phenoxymethylpenicillin      | 2.09  | 1.48 | 0.61  |
| Phenserine                   | 4.19  | 4.17 | 0.02  |
| Phenyl aminosalicylate       | 3.15  | 2.68 | 0.47  |
| Phenyl benzoate              | 3.59  | 3.48 | 0.11  |
| Phenyl N,N-dimethylcarbamate | 1.69  | 1.79 | -0.10 |
| Phenyl N-methylcarbamate     | 1.24  | 1.45 | -0.21 |

|                              |       |       |       |
|------------------------------|-------|-------|-------|
| Phenyl-2-tolylcarbinol       | 3.06  | 3.35  | -0.29 |
| Phenyl-4-tolylcarbinol       | 3.13  | 3.35  | -0.22 |
| Phenylacetamide              | 0.45  | 1     | -0.55 |
| Phenylacetate                | 1.49  | 2.18  | -0.69 |
| Phenylacetic acid            | 1.41  | 1.89  | -0.48 |
| Phenylacetonitrile           | 1.56  | 2.04  | -0.48 |
| Phenylalanine                | -1.43 | -1.18 | -0.25 |
| Phenylbutazone               | 3.16  | 3.19  | -0.03 |
| Phenylcyclopropylcarbinol    | 1.95  | 2.35  | -0.40 |
| Phenylethanal                | 1.78  | 2.01  | -0.23 |
| Phenylformate                | 1.26  | 1.64  | -0.38 |
| Phenylglycerol               | 0.7   | -0.22 | 0.92  |
| Phenylhydrazine              | 1.25  | 1.03  | 0.22  |
| Phenylisocyanate             | 2.59  | 2.29  | 0.30  |
| Phenylisothiocyanate         | 3.28  | 3.18  | 0.10  |
| Phenylmethanol               | 1.1   | 1.24  | -0.14 |
| Phenylpropylether            | 3.18  | 3.03  | 0.15  |
| Phenylthioacetic acid        | 1.91  | 1.86  | 0.05  |
| Phenylthiocyanate            | 2.54  | 2.45  | 0.09  |
| Phenylthiourea               | 0.73  | 0.96  | -0.23 |
| Phenyltrifluoromethylsulfone | 2.68  | 2.6   | 0.08  |
| Phenylurea                   | 0.82  | 0.92  | -0.10 |
| Phenylvinylketone            | 1.88  | 1.93  | -0.05 |
| Phlorol                      | 2.47  | 2.61  | -0.14 |
| Phosphamide                  | 0.78  | 0.68  | 0.10  |
| Phthalic acid                | 0.73  | 0.52  | 0.21  |
| Phthalic anhydride           | 1.43  | 1.6   | -0.17 |
| Phthalophos                  | 2.78  | 2.75  | 0.03  |
| Phthiocol                    | 1.2   | 1.22  | -0.02 |
| Physostigmine                | 1.58  | 2.21  | -0.63 |
| Pimozide                     | 6.3   | 6.75  | -0.45 |
| Pinacolone                   | 1.2   | 1.49  | -0.29 |
| Pindolol                     | 1.92  | 1.6   | 0.32  |
| Pipamperone                  | 2.02  | 1.87  | 0.15  |
| Piperazine                   | -1.17 | -1.03 | -0.14 |
| Piperidine                   | 0.85  | 0.75  | 0.10  |
| Piperonal                    | 1.05  | 1.5   | -0.45 |
| Piperonyl alcohol            | 1.05  | 1.17  | -0.12 |
| Pipracil                     | 0.5   | -0.03 | 0.53  |
| Piracetam                    | -1.54 | -1.13 | -0.41 |
| Pirenzepine                  | 0.6   | 0.45  | 0.15  |
| Piretanide                   | 1.5   | 1.74  | -0.24 |

|                                      |       |       |       |
|--------------------------------------|-------|-------|-------|
| Pirimicarb                           | 1.7   | 1.68  | 0.02  |
| Piroxicam                            | 3.06  | 3.41  | -0.35 |
| p-Isopropylphenyl diphenyl phosphate | 5.7   | 5.22  | 0.48  |
| Pivalone                             | 3     | 2.57  | 0.43  |
| Pivalonitrile                        | 1.08  | 1.38  | -0.30 |
| p-Menthadiene                        | 4.38  | 4.07  | 0.31  |
| Practolol                            | 0.79  | 0.95  | -0.16 |
| Prazepam                             | 3.72  | 3.91  | -0.19 |
| Prednisolone                         | 1.62  | 1.65  | -0.03 |
| Prednisone                           | 1.47  | 1.67  | -0.20 |
| Preforan                             | 3.65  | 4.53  | -0.88 |
| Pregnenolone                         | 4.22  | 4.6   | -0.38 |
| Prehnitene                           | 3.98  | 3.79  | 0.19  |
| Proazamine                           | 4.81  | 4.45  | 0.36  |
| Probarbital                          | 0.97  | 0.72  | 0.25  |
| Procainamide                         | 0.88  | 0.96  | -0.08 |
| Procaine                             | 1.92  | 1.8   | 0.12  |
| Procarbazine                         | 0.06  | 0.23  | -0.17 |
| Procodazole                          | 1.3   | 1.59  | -0.29 |
| Procymidone                          | 3     | 2.94  | 0.06  |
| Progabide                            | 2.97  | 3.12  | -0.15 |
| Progesterone                         | 3.87  | 4.74  | -0.87 |
| Promazine                            | 4.55  | 4.46  | 0.09  |
| Promecarb                            | 3.1   | 2.85  | 0.25  |
| Prometon                             | 2.99  | 3.29  | -0.30 |
| Prometryn                            | 3.51  | 3.59  | -0.08 |
| Pronamide                            | 3.26  | 2.92  | 0.34  |
| Propachlor                           | 2.18  | 2.41  | -0.23 |
| Propanal                             | 0.59  | 0.71  | -0.12 |
| Propandioic acid                     | -0.81 | -0.17 | -0.64 |
| Propane                              | 2.36  | 1.98  | 0.38  |
| Propanenitrile                       | 0.16  | 0.74  | -0.58 |
| Propanil                             | 3.07  | 2.98  | 0.09  |
| Propanoic acid                       | 0.33  | 0.59  | -0.26 |
| Propanoic anhydride                  | 0.4   | 1.38  | -0.98 |
| Propanolamine                        | -1.12 | -1.04 | -0.08 |
| Propanone                            | -0.24 | 0.41  | -0.65 |
| Propargyl acetate                    | 0.28  | 0.57  | -0.29 |
| Propargyl propionate                 | 0.81  | 1.01  | -0.20 |
| Propargylamine                       | -0.43 | -0.49 | 0.06  |
| Propazine                            | 2.93  | 3.04  | -0.11 |
| Propenal                             | -0.01 | 0.49  | -0.50 |

|                               |       |       |       |
|-------------------------------|-------|-------|-------|
| Propham                       | 2.6   | 2.61  | -0.01 |
| Propiolic acid                | -0.52 | -0.19 | -0.33 |
| Propionanilide                | 1.61  | 1.92  | -0.31 |
| Propoxur                      | 1.52  | 2.28  | -0.76 |
| Propranolol                   | 2.98  | 2.7   | 0.28  |
| Propyl 4-hydroxybenzoate      | 3.04  | 2.25  | 0.79  |
| Propyl butyrate               | 2.3   | 2.23  | 0.07  |
| Propyl chloroformate          | 1.12  | 1.08  | 0.04  |
| Propyl isothiocyanate         | 2.42  | 2.67  | -0.25 |
| Propyl N-methylcarbamate      | 0.95  | 0.62  | 0.33  |
| Propyl propanoate             | 1.77  | 1.79  | -0.02 |
| Propyl valerate               | 2.83  | 2.67  | 0.16  |
| Propyl-1,2-dinitrate          | 1.83  | 2.32  | -0.49 |
| Propylene                     | 1.77  | 1.55  | 0.22  |
| Propylenecarbonate            | -0.41 | 0.32  | -0.73 |
| Propylisopropylacetamide      | 1.48  | 1.83  | -0.35 |
| Propyne                       | 0.94  | 0.99  | -0.05 |
| Prostaglandin F2A             | 2.28  | 3.21  | -0.93 |
| Prosulfuron                   | 2.8   | 3.13  | -0.33 |
| Proxyphylline                 | -0.77 | -0.6  | -0.17 |
| Prozac                        | 3.82  | 4.72  | -0.90 |
| Pseudococaine                 | 2.09  | 2.4   | -0.31 |
| p-Terphenyl                   | 6.03  | 5.87  | 0.16  |
| p-Toluidine                   | 1.39  | 1.66  | -0.27 |
| p-Tolyl N,N-dimethylcarbamate | 2.03  | 2.13  | -0.10 |
| Pulegone                      | 3.08  | 2.79  | 0.29  |
| Purine                        | -0.37 | -0.28 | -0.09 |
| Pyrazinamide                  | -1.88 | -2.1  | 0.22  |
| Pyrazine                      | -0.22 | -0.47 | 0.25  |
| Pyrazon                       | 1.14  | 0.27  | 0.87  |
| Pyrene                        | 5.08  | 5.05  | 0.03  |
| Pyridine                      | 0.65  | 0.88  | -0.23 |
| Pyrimidine                    | -0.4  | -0.15 | -0.25 |
| Pyrrole                       | 0.75  | 0.58  | 0.17  |
| Pyrrolidine                   | 0.46  | 0.45  | 0.01  |
| Quadricyclane                 | 2.9   | 3.1   | -0.20 |
| Quatrimycin                   | -1.47 | -1.73 | 0.26  |
| Quazepam                      | 4.03  | 4.21  | -0.18 |
| Quercitrin                    | 0.8   | 0.39  | 0.41  |
| Quinazolin-2,4-dione          | 0.2   | 0.88  | -0.68 |
| Quinazolin-4-one              | 0.77  | 0.5   | 0.27  |
| Quinclorac                    | 3.6   | 3.07  | 0.53  |

|                       |       |       |       |
|-----------------------|-------|-------|-------|
| Quinine               | 3.5   | 2.82  | 0.68  |
| Quinmerac             | 0.78  | 0.95  | -0.17 |
| Quinoclamine          | 2.12  | 1.17  | 0.95  |
| Quinoline             | 2.03  | 2.28  | -0.25 |
| Quinoline-1-oxide     | 0.36  | 0.89  | -0.53 |
| Quinoxaline           | 1.32  | 1.33  | -0.01 |
| Ranitidine            | 1.28  | 1.45  | -0.17 |
| Rebemide              | 1.25  | 2.26  | -1.01 |
| Reglone               | -4.6  | -4.53 | -0.07 |
| Remoxipride           | 2.13  | 2.96  | -0.83 |
| Renriduron            | 1.3   | 1.17  | 0.13  |
| Retinol               | 5.68  | 5.42  | 0.26  |
| Ribavirin             | -2.6  | -3.38 | 0.78  |
| Rivastigmine          | 2.1   | 2.51  | -0.41 |
| Ronidazole            | -0.38 | -0.48 | 0.10  |
| Ropivacaine           | 2.9   | 3.47  | -0.57 |
| Rosamicin             | 2.19  | 1.43  | 0.76  |
| Saccharin             | 0.91  | 0.41  | 0.50  |
| Saccharose            | -3.7  | -3.44 | -0.26 |
| Salicylanilide        | 3.27  | 2.89  | 0.38  |
| Salicylic acid        | 2.19  | 1.56  | 0.63  |
| Sarin                 | 0.3   | 0.42  | -0.12 |
| s-Butylacrylate       | 1.78  | 2.04  | -0.26 |
| s-Butylbenzene        | 4.44  | 3.93  | 0.51  |
| s-Butylpropylamine    | 1.91  | 2.12  | -0.21 |
| Scopolamine           | 1.24  | 1.4   | -0.16 |
| Secnidazole           | 0.22  | 0.56  | -0.34 |
| Seconal               | 2.39  | 1.82  | 0.57  |
| Semustine             | 3.3   | 2.84  | 0.46  |
| Serotonin             | 0.53  | 1.16  | -0.63 |
| Sethoxydim            | 4.38  | 4.3   | 0.08  |
| Simazine              | 2.18  | 2.18  | 0.00  |
| Simvastatin           | 4.68  | 5.72  | -1.04 |
| Skatole               | 2.6   | 2.54  | 0.06  |
| Soman                 | 1.82  | 1.5   | 0.32  |
| Sorbitol              | -3.1  | -3.53 | 0.43  |
| s-Phenethyl alcohol   | 1.42  | 1.71  | -0.29 |
| Stavudine             | -0.81 | -0.06 | -0.75 |
| s-trans-1,3-Butadiene | 1.99  | 1.79  | 0.20  |
| Stugeron              | 5.77  | 5.7   | 0.07  |
| Styrene               | 2.95  | 2.95  | 0.00  |
| Styrene oxide         | 1.61  | 1.94  | -0.33 |

|                                            |       |       |       |
|--------------------------------------------|-------|-------|-------|
| Succinonitrile                             | -0.99 | 0.21  | -1.20 |
| Sufentanil                                 | 3.95  | 4.11  | -0.16 |
| Sulcatone                                  | 1.82  | 2.18  | -0.36 |
| Sulfadimidine                              | 0.27  | 0.86  | -0.59 |
| Sulfafurazole                              | 1.01  | 0.67  | 0.34  |
| Sulfaguanidine                             | -1.22 | -1.14 | -0.08 |
| Sulfamerazine                              | 0.14  | 0.48  | -0.34 |
| Sulfamethoxydiazine                        | 0.41  | 0.03  | 0.38  |
| Sulfaperine                                | 0.34  | 0.44  | -0.10 |
| Sulfaphenazole                             | 1.52  | 1.43  | 0.09  |
| Sulfasomidine                              | -0.3  | -0.03 | -0.27 |
| Sulfathiazole                              | 0.05  | 0.56  | -0.51 |
| Sulfinpyrazone                             | 2.3   | 1.91  | 0.39  |
| Sulfolane                                  | -0.77 | 0.03  | -0.80 |
| Sulfometuron-methyl                        | 1.4   | 0.92  | 0.48  |
| Sulforidazine                              | 4.45  | 4.37  | 0.08  |
| Sulindac                                   | 3.6   | 3.56  | 0.04  |
| Sulphadiazine                              | -0.08 | 0.1   | -0.18 |
| Tacrine                                    | 3.32  | 2.89  | 0.43  |
| Tamoxifen                                  | 7.1   | 6.67  | 0.43  |
| Tavron                                     | 4.56  | 4.97  | -0.41 |
| t-Butyl propionate                         | 1.95  | 2.03  | -0.08 |
| t-Butylamine                               | 0.4   | 0.68  | -0.28 |
| t-Butylbenzene                             | 4.11  | 3.85  | 0.26  |
| t-Butylformate                             | 0.97  | 1.05  | -0.08 |
| t-Butylmercaptan                           | 2.14  | 2.09  | 0.05  |
| Temaflouxacin                              | -0.2  | -0.04 | -0.16 |
| Temazepam                                  | 2.19  | 2.49  | -0.30 |
| Terbacil                                   | 1.89  | 2.28  | -0.39 |
| Terbufos                                   | 4.48  | 4.59  | -0.11 |
| Terbutryne                                 | 3.74  | 3.56  | 0.18  |
| Terfenadine                                | 7.1   | 6.94  | 0.16  |
| Testosterone                               | 3.32  | 4.02  | -0.70 |
| Tetrabromo-2-trifluoromethylbenzimidazole  | 4.81  | 5.02  | -0.21 |
| Tetracene                                  | 5.9   | 5.59  | 0.31  |
| Tetrachloro-2-trifluoromethylbenzimidazole | 3.97  | 4.54  | -0.57 |
| Tetrachlorocatechol                        | 4.29  | 3.55  | 0.74  |
| Tetrachloroethylene                        | 3.4   | 3.15  | 0.25  |
| Tetrachloroveratrole                       | 4.86  | 4.21  | 0.65  |
| Tetracosane                                | 12.53 | 13.11 | -0.58 |
| Tetradecane                                | 8     | 7.81  | 0.19  |
| Tetrahydrofuran                            | 0.46  | 0.77  | -0.31 |

|                       |       |       |       |
|-----------------------|-------|-------|-------|
| Tetrahydropyran       | 0.95  | 1.07  | -0.12 |
| Tetramethylene glycol | 0.27  | -0.25 | 0.52  |
| Tetramethylguanidine  | 0.41  | -0.05 | 0.46  |
| Tetramethylurea       | 0.19  | -0.1  | 0.29  |
| Tetraphenylmethane    | 7.88  | 8.05  | -0.17 |
| Tetrazepam            | 2.76  | 3.11  | -0.35 |
| Tetroxoprim           | 0.56  | 1.32  | -0.76 |
| Theophylline          | -0.18 | -0.18 | 0.00  |
| Thiamazole            | -0.34 | -0.35 | 0.01  |
| Thiameturon           | 0.02  | 0.57  | -0.55 |
| Thiamphenicol         | -0.27 | -0.48 | 0.21  |
| Thianaphthene         | 3.12  | 3.37  | -0.25 |
| Thianthrene           | 4.57  | 5.01  | -0.44 |
| Thiazole              | 0.44  | 0.42  | 0.02  |
| Thiazone              | 1.4   | 1.42  | -0.02 |
| Thimet                | 3.56  | 3.82  | -0.26 |
| Thioacetamide         | -0.26 | -0.41 | 0.15  |
| Thioacetanilide       | 1.71  | 1.81  | -0.10 |
| Thioacetic acid       | 0.14  | 0.15  | -0.01 |
| Thioanisole           | 2.74  | 2.7   | 0.04  |
| Thiobencarb           | 3.4   | 4.18  | -0.78 |
| Thiolane              | 1.61  | 1.64  | -0.03 |
| Thiolane 1-oxide      | -0.96 | -0.6  | -0.36 |
| Thiophanate-ethyl     | 1.4   | 1.33  | 0.07  |
| Thiophene             | 1.81  | 2.23  | -0.42 |
| Thiophos              | 3.83  | 3.85  | -0.02 |
| Thioridazine          | 5.9   | 5.85  | 0.05  |
| Thiourea              | -1.02 | -1.26 | 0.24  |
| Thioxamyl             | -0.47 | -0.4  | -0.07 |
| Thioxanthone          | 3.99  | 3.65  | 0.34  |
| Threonine             | -3.5  | -3.78 | 0.28  |
| Thyreoliberin         | -2.47 | -3    | 0.53  |
| Tiabendazole          | 1.94  | 2.09  | -0.15 |
| Tiapride              | 0.9   | 1.3   | -0.40 |
| Tinidazole            | 0.23  | 0.26  | -0.03 |
| t-Nitrobutane         | 1.17  | 1.38  | -0.21 |
| TNT                   | 1.73  | 2.18  | -0.45 |
| Tolane                | 4.78  | 4.55  | 0.23  |
| Tolazoline            | 2.65  | 1.89  | 0.76  |
| Tolbutamide           | 2.34  | 2.08  | 0.26  |
| Tolclofos-methyl      | 4.56  | 4.52  | 0.04  |
| Toliprolol            | 1.93  | 2.04  | -0.11 |

|                                   |       |      |       |
|-----------------------------------|-------|------|-------|
| Tolmetin                          | 2.79  | 2.79 | 0.00  |
| t-Pentylcarbamate                 | 0.94  | 1.04 | -0.10 |
| t-Pentylisothiocyanate            | 3.13  | 3.5  | -0.37 |
| Tralkoxydim                       | 4.46  | 4.62 | -0.16 |
| Tramadol                          | 2.63  | 2.35 | 0.28  |
| Tranexamic acid                   | -1.87 | -1.5 | -0.37 |
| trans-1,2-Cycloheptyl dinitrate   | 3.41  | 3.05 | 0.36  |
| trans-1,2-Cyclohexyl dinitrate    | 2.62  | 2.75 | -0.13 |
| trans-1,2-Dichloroethylene        | 2.09  | 1.75 | 0.34  |
| trans-1,3-Cyclohexyl dinitrate    | 2.89  | 2.75 | 0.14  |
| trans-1,3-Dichloropropene         | 1.41  | 1.81 | -0.40 |
| trans-1-Propenylbenzene           | 3.35  | 3.23 | 0.12  |
| trans-2,5-Dimethyltetrahydrofuran | 1.34  | 1.71 | -0.37 |
| trans-2-Butene                    | 2.31  | 1.83 | 0.48  |
| trans-2-Hepten-1-ol               | 1.93  | 1.74 | 0.19  |
| trans-2-Hexen-1-ol                | 1.4   | 1.3  | 0.10  |
| trans-2-Methylcyclohexanol        | 1.84  | 1.51 | 0.33  |
| trans-2-Nonenoic acid             | 3.53  | 2.83 | 0.70  |
| trans-2-Octenoic acid             | 3     | 2.39 | 0.61  |
| trans-2-Pentenoic acid            | 1.41  | 1.07 | 0.34  |
| trans-2-Phenylcyclopropylamine    | 1.49  | 1.78 | -0.29 |
| trans-3-Hexenoic acid             | 1.4   | 1.51 | -0.11 |
| trans-3-Pentenitrile              | 0.71  | 1.22 | -0.51 |
| trans-3-Phenyl-2-propen-1-ol      | 1.95  | 1.72 | 0.23  |
| trans-3-Phenyl-2-propenenitrile   | 1.96  | 2.08 | -0.12 |
| trans-4-Methylcyclohexanol        | 1.79  | 1.51 | 0.28  |
| trans-Cinnamic acid               | 2.08  | 1.93 | 0.15  |
| trans-Stilbene                    | 4.81  | 4.63 | 0.18  |
| Trazodone                         | 2.9   | 3.28 | -0.38 |
| Triallate                         | 4.29  | 4.96 | -0.67 |
| Triasulfuron                      | 1.6   | 2.25 | -0.65 |
| Triazamate                        | 1.62  | 2.07 | -0.45 |
| Triazolam                         | 5.5   | 5.5  | 0.00  |
| Tribenuron-methyl                 | 1.5   | 0.76 | 0.74  |
| Tributyl phosphate                | 4.01  | 4.01 | 0.00  |
| Trichlormethiazide                | 0.56  | 0.14 | 0.42  |
| Trichloroacetamide                | 1.04  | 0.59 | 0.45  |
| Trichloroacetic acid              | 1.33  | 1.48 | -0.15 |
| Trichloroacetonitrile             | 2.09  | 1.63 | 0.46  |
| Trichloroethylene                 | 2.53  | 2.45 | 0.08  |
| Trichloromethylthiobenzene        | 3.78  | 3.8  | -0.02 |
| Trichlorosyringol                 | 3.74  | 3.28 | 0.46  |

|                               |       |       |       |
|-------------------------------|-------|-------|-------|
| Triclosan                     | 4.76  | 5.05  | -0.29 |
| Tridecane                     | 7.33  | 7.28  | 0.05  |
| Triethanolamine               | -1    | -1.7  | 0.70  |
| Triethyl phosphate            | 0.8   | 1.37  | -0.57 |
| Triethylamine                 | 1.45  | 1.77  | -0.32 |
| Triflumethazine               | 4.36  | 4.28  | 0.08  |
| Triflumizole                  | 1.4   | 2.23  | -0.83 |
| Trifluoperazine               | 5.03  | 5.06  | -0.03 |
| Trifluoroacetamide            | 0.12  | -0.15 | 0.27  |
| Trifluoroacetanilide          | 2.21  | 2.07  | 0.14  |
| Trifluoroacetic acid          | 0.5   | 0.74  | -0.24 |
| Trifluoroacetophenone         | 2.15  | 2.3   | -0.15 |
| Trifluoromethylthiobenzene    | 3.57  | 4.08  | -0.51 |
| Trifluralin                   | 5.34  | 4.57  | 0.77  |
| Triflusulfuron-methyl         | 3.4   | 3.27  | 0.13  |
| Triforine                     | 2.2   | 1.99  | 0.21  |
| Trihexyphenidyl               | 4.49  | 4.34  | 0.15  |
| Trimellitic anhydride         | 0.99  | 0.82  | 0.17  |
| Trimeprazine                  | 4.71  | 4.74  | -0.03 |
| Trimethadione                 | -0.37 | -0.03 | -0.34 |
| Trimethoprim                  | 0.91  | 1.46  | -0.55 |
| Trimethyl phosphate           | -0.52 | 0.08  | -0.60 |
| Trimethylacetic acid          | 1.47  | 1.23  | 0.24  |
| Trimethylamine                | 0.16  | 0.12  | 0.04  |
| Trimethyleneglycol dinitrate  | 1.68  | 1.87  | -0.19 |
| Trimetrexate                  | 2.55  | 2.32  | 0.23  |
| Triphenyl phosphate           | 3.9   | 4.16  | -0.26 |
| Triphenylamine                | 5.74  | 4.9   | 0.84  |
| Triprolidine                  | 3.92  | 3.93  | -0.01 |
| Tripropyl phosphate           | 1.87  | 2.69  | -0.82 |
| Tripropylamine                | 2.79  | 3.09  | -0.30 |
| Triptanol                     | 4.93  | 5.48  | -0.55 |
| Tris(2-chloroethyl) phosphate | 1.48  | 1.55  | -0.07 |
| Tris-BP                       | 4.39  | 4.22  | 0.17  |
| Tropolone                     | 0.53  | 0.99  | -0.46 |
| Trovaflouxacin                | 0.15  | -0.59 | 0.74  |
| Tryptophane                   | -1.04 | -1.21 | 0.17  |
| Tyrosine                      | -1.8  | -1.58 | -0.22 |
| Undecane                      | 6.31  | 6.22  | 0.09  |
| Undecanedioic acid            | 2.85  | 2.84  | 0.01  |
| Undecanonitrile               | 4.37  | 4.26  | 0.11  |
| Uracil                        | -1.07 | -0.67 | -0.40 |

|                    |       |       |       |
|--------------------|-------|-------|-------|
| Urea               | -1.66 | -1.3  | -0.36 |
| Uridine            | -1.71 | -2.57 | 0.86  |
| Valeryl chloride   | 2.46  | 2.6   | -0.14 |
| Valine             | -2.1  | -2.2  | 0.10  |
| Valium             | 2.99  | 2.72  | 0.27  |
| Veratrole          | 2.18  | 2.09  | 0.09  |
| Vernolate          | 3.84  | 3.67  | 0.17  |
| Viagra             | 1.9   | 1.71  | 0.19  |
| Vinclozolin        | 3.1   | 2.72  | 0.38  |
| Vinyl acetate      | 0.73  | 0.93  | -0.20 |
| Vinyl butyrate     | 1.81  | 1.81  | 0.00  |
| Vinylidenechloride | 2.13  | 2.19  | -0.06 |
| Vinylpropionate    | 1.29  | 1.37  | -0.08 |
| Vitamin B3         | -0.37 | -0.79 | 0.42  |
| Vitamin B6         | -0.5  | -0.35 | -0.15 |
| Vitamin C          | -1.85 | -1.67 | -0.18 |
| Vitavax            | 2.14  | 1.96  | 0.18  |
| Voltaren           | 4.51  | 4.26  | 0.25  |
| Xylose             | -3.02 | -2.93 | -0.09 |
| Zalcitabine        | -1.3  | -0.86 | -0.44 |
| Zofenopril         | 3.5   | 3.25  | 0.25  |
| Zoocoumarin        | 3.54  | 4.15  | -0.61 |
