# Supplementary material
Source: MDPI journal article supplement (https://www.mdpi.com/2673-8015/4/1/11)
Supplement: s1 [file s1]

**Outliers of logKoa**

| <b>Name</b>                 | <b>logKoa exp</b> | <b>logKoa calc</b> | <b>Diff</b> |
|-----------------------------|-------------------|--------------------|-------------|
| Metosulam                   | 16.74             | 9.29               | 7.45        |
| 2,2'-Azobisisobutyronitrile | 4.69              | 12.02              | -7.33       |
| Flurtamone                  | 14.44             | 8.32               | 6.12        |
| Gibberellic acid            | 10.32             | 16.22              | -5.90       |
| Aldoxycarb S,S-dioxide      | 6.01              | 11.69              | -5.68       |
| Fluazinam                   | 6.94              | 12.15              | -5.21       |
| Tricyclazole                | 10.28             | 5.80               | 4.48        |
| Thiazopyr                   | 8.62              | 13.03              | -4.41       |
| Galactitol                  | 13.99             | 9.93               | 4.06        |
| tau-Fluvalinate             | 11.43             | 15.43              | -4.00       |
| Decachlorodiphenyl ether    | 8.24              | 12.17              | -3.93       |
| Thiencarbazone-methyl       | 9.66              | 13.57              | -3.91       |
| Metaldehyde                 | 2.75              | 6.54               | -3.79       |
| 4-Cyanophenol               | 10.51             | 6.87               | 3.64        |
| Flumetralin                 | 8.37              | 11.76              | -3.39       |
| Bixafen                     | 10.54             | 13.88              | -3.34       |
| Dodecamethylpentasiloxane   | 2.29              | 5.52               | -3.23       |
| Phenazopyridine             | 14.05             | 10.86              | 3.19        |
| Quizalofop-P-ethyl          | 11.23             | 14.40              | -3.17       |
| Salicylaldehyde             | 8.70              | 5.61               | 3.09        |
| Warfarin                    | 10.34             | 13.37              | -3.03       |
| Phosmet                     | 8.48              | 11.41              | -2.93       |
| Milbemycin a-4              | 16.13             | 19.04              | -2.91       |
| Profluralin                 | 7.72              | 10.61              | -2.89       |
| Ethirimol                   | 8.83              | 11.68              | -2.85       |
| Chlorpromazine              | 13.32             | 10.49              | 2.83        |
| Diphacinone                 | 12.29             | 15.11              | -2.82       |
| Prodiamine                  | 7.59              | 10.33              | -2.74       |
| Dimethipin                  | 8.43              | 5.70               | 2.73        |
| Fluopicolide                | 10.12             | 12.80              | -2.68       |
| Buprofezin                  | 8.88              | 11.49              | -2.61       |
| Acrinathrin                 | 10.61             | 13.19              | -2.58       |
| Fluazifop                   | 13.76             | 11.22              | 2.54        |
| Fluchloralin                | 7.63              | 10.16              | -2.53       |
| Imazamox                    | 14.38             | 16.89              | -2.51       |
| Aminocyclopyrachlor         | 8.91              | 11.38              | -2.47       |
| Metazachlor                 | 9.14              | 6.67               | 2.47        |
| Spiromesifen                | 9.46              | 11.91              | -2.45       |
| Daimuron                    | 10.00             | 12.43              | -2.43       |
| Chloridazon                 | 12.85             | 10.44              | 2.41        |
| Thiazafluron                | 9.22              | 6.82               | 2.40        |
| Paraldehyde                 | 3.09              | 5.44               | -2.35       |
| Benfluralin                 | 7.50              | 9.81               | -2.31       |
| Oxadixyl                    | 10.12             | 7.81               | 2.31        |
| Chlorflurenol-methyl        | 9.17              | 11.42              | -2.25       |
| Fenoxanil                   | 13.32             | 11.07              | 2.25        |
| Valifenalate                | 11.63             | 13.86              | -2.23       |
| Diclofop                    | 13.75             | 11.57              | 2.18        |
| 4-CPA                       | 10.11             | 7.94               | 2.17        |
| Isoxaflutole                | 9.77              | 11.93              | -2.16       |
| 4-Nitrophenol               | 9.23              | 7.09               | 2.14        |
| Imazaquin                   | 15.88             | 18.01              | -2.13       |
| Fluoxastrobin               | 12.91             | 10.79              | 2.12        |

|                                                 |       |       |       |
|-------------------------------------------------|-------|-------|-------|
| Hydroprene                                      | 9.36  | 7.24  | 2.12  |
| 8-Hydroxyquinoline                              | 6.57  | 8.67  | -2.10 |
| Dicyclopentadiene                               | 3.18  | 5.27  | -2.09 |
| Isoxaben                                        | 10.64 | 8.56  | 2.08  |
| Nuarimol                                        | 9.94  | 12.00 | -2.06 |
| Perfluoroethane                                 | -0.69 | 1.37  | -2.06 |
| Bendiocarb                                      | 7.14  | 9.19  | -2.05 |
| Flumetsulam                                     | 13.19 | 11.14 | 2.05  |
| Ethalfuralin                                    | 7.53  | 9.55  | -2.02 |
| Quizalofop-Ethyl                                | 10.72 | 12.74 | -2.02 |
| Methomyl                                        | 8.80  | 6.79  | 2.01  |
| Lactofen                                        | 10.58 | 12.56 | -1.98 |
| Fuberidazole                                    | 11.07 | 9.10  | 1.97  |
| Dichlorprop                                     | 10.68 | 8.72  | 1.96  |
| Dimethirimol                                    | 8.81  | 10.76 | -1.95 |
| Fampridine                                      | 7.99  | 6.06  | 1.93  |
| MCPA                                            | 10.28 | 8.36  | 1.92  |
| Fluoroimide                                     | 5.49  | 7.38  | -1.89 |
| Trifluralin                                     | 7.93  | 9.81  | -1.88 |
| Dichlorophen                                    | 14.33 | 12.48 | 1.85  |
| Triflumizole                                    | 10.90 | 9.06  | 1.84  |
| Propetamphos                                    | 9.14  | 7.32  | 1.82  |
| 1-Methylindole                                  | 6.76  | 4.96  | 1.80  |
| 6-Hydroxy-2,2',3,3',4,6'-hexabromodiphenylether | 12.30 | 14.10 | -1.80 |
| Bensulfuron-methyl                              | 14.38 | 16.17 | -1.79 |
| 1,2-Phenylenediamine                            | 5.64  | 7.43  | -1.79 |
| Phenacetin                                      | 9.59  | 7.82  | 1.77  |
| 2,2',3,3',4,4',5,5',6-Nonachlorodiphenyl ether  | 9.81  | 11.56 | -1.75 |
| Ethametsulfuron-methyl                          | 14.28 | 16.02 | -1.74 |
| Furametpyr                                      | 12.18 | 13.92 | -1.74 |
| Propanil                                        | 10.38 | 8.64  | 1.74  |
| 2,2',3,4,4',5',6-Heptabromodiphenylether        | 14.40 | 12.67 | 1.73  |
| Diallate                                        | 8.84  | 7.11  | 1.73  |
| Pefurazate                                      | 9.46  | 11.19 | -1.73 |
| 3-Nitrophenol                                   | 8.81  | 7.09  | 1.72  |
| Iprovalicarb                                    | 11.69 | 13.40 | -1.71 |
| Iprodione                                       | 10.76 | 12.46 | -1.70 |
| 5-Hydroxy-2,2',4,4',5'-pentabromodiphenylether  | 11.47 | 13.17 | -1.70 |
| Benodanil                                       | 9.57  | 11.26 | -1.69 |
| Tembotrione                                     | 12.47 | 14.16 | -1.69 |
| Tribenuron-methyl                               | 11.09 | 12.77 | -1.68 |
| Salithion                                       | 4.98  | 6.66  | -1.68 |
| 3-Cyanophenol                                   | 8.43  | 6.80  | 1.63  |
| 4-Nitroaniline                                  | 8.41  | 6.79  | 1.62  |
| Benzylaminopurine                               | 12.86 | 11.24 | 1.62  |
| 2,4-D                                           | 10.15 | 8.54  | 1.61  |
| Bis(2-ethylhexyl)phthalate                      | 10.48 | 12.09 | -1.61 |
| Diclobutrazol                                   | 11.00 | 9.40  | 1.60  |
| Picric acid                                     | 9.99  | 8.39  | 1.60  |
| 4-Hydroxybenzaldehyde                           | 8.75  | 7.15  | 1.60  |
| Trinexapac-ethyl                                | 7.92  | 9.49  | -1.57 |
| 2'-Hydroxy-2,3',4,5'-tetrabromodiphenylether    | 10.68 | 12.24 | -1.56 |
| Triazamate                                      | 10.75 | 12.30 | -1.55 |
| Butanedinitrile                                 | 5.16  | 3.61  | 1.55  |
| Maleic hydrazide                                | 9.01  | 7.46  | 1.55  |

|                                              |       |           |       |
|----------------------------------------------|-------|-----------|-------|
| 2,2-Dichloroethanol                          | 3.14  | 4.68      | -1.54 |
| Chlordecone                                  | 10.87 | 9.33      | 1.54  |
| 2,4-Dinitrophenol                            | 6.98  | 8.51      | -1.53 |
| 4-Hydroxy-3-nitrobenzaldehyde                | 5.53  | 7.03      | -1.50 |
| 2,2',3,3',4,4',5,5'-Octachlorodiphenyl ether | 9.47  | 10.96     | -1.49 |
| Imazalil                                     | 10.38 | 8.89      | 1.49  |
| Ethyl 4-(4-chloro-2-methylphenoxy)butanoate  | 9.15  | 7.67      | 1.48  |
| Trichloroacetonitrile                        | 2.34  | 3.81      | -1.47 |
| 2,2,2-Trifluoroethylacetate                  | 1.56  | 3.02      | -1.46 |
| Azinphos-methyl                              | 10.83 | 9.38      | 1.45  |
| trans-Azobenzene                             | 7.06  | 8.49      | -1.43 |
| Cymoxanil                                    | 7.75  | 9.18      | -1.43 |
| 3,5-Dichlorophenol                           | 8.28  | 6.86      | 1.42  |
| Cyhalofop-butyl                              | 9.23  | 10.64     | -1.41 |
| 5-Hydroxy-2,2',4,4'-tetrabromodiphenylether  | 10.82 | 12.23     | -1.41 |
| N-Methyl-N-nitrosobenzenemethanamine         | 5.15  | 6.56      | -1.41 |
| 6-Hydroxy-2,2',4,4'-tetrabromodiphenylether  | 10.83 | 12.23     | -1.40 |
| Fenpropathrin                                | 9.37  | 10.77     | -1.40 |
| Dichloroacetic acid                          | 7.14  | 5.76      | 1.38  |
| p-tert-Butylphenyl diphenyl phosphate        | 9.62  | 10.94     | -1.32 |
| Amitraz                                      | 10.11 | 9.04      | 1.07  |
| Imidacloprid                                 | 12.94 | not calc. |       |
| Nitroguanidine                               | 11.93 | not calc. |       |
