# Supplementary material
Source: MDPI journal article supplement (https://www.mdpi.com/2673-8015/4/1/11)
Supplement: s1 [file s1]

**Outliers of logP<sub>ow</sub>**

| <b>Name</b>                                  | <b>logP<sub>ow</sub> exp</b> | <b>logP<sub>ow</sub> calc</b> | <b>Diff.</b> |
|----------------------------------------------|------------------------------|-------------------------------|--------------|
| Pyridine-N-oxide                             | -1.69                        | 3.67                          | -5.36        |
| Roxithromycin                                | 3.79                         | -0.06                         | 3.85         |
| 2-Methyl-4-nitroquinoline-1-oxide            | 1.25                         | -2.49                         | 3.74         |
| Azithromycin                                 | 4.02                         | 0.29                          | 3.73         |
| Phthalide                                    | 0.80                         | 3.97                          | -3.17        |
| 8-Azaadenine                                 | -0.96                        | 2.09                          | -3.05        |
| Erythromycin                                 | 2.54                         | -0.29                         | 2.83         |
| 2-Methylbenzaloxime                          | 2.53                         | -0.21                         | 2.74         |
| Amitrole                                     | -0.87                        | 1.83                          | -2.70        |
| Clarithromycin                               | 3.16                         | 0.70                          | 2.46         |
| 8-Azaguanine                                 | -0.71                        | 1.61                          | -2.32        |
| Benzaloxime                                  | 1.75                         | -0.54                         | 2.29         |
| Altretamine                                  | 2.73                         | 0.51                          | 2.22         |
| Dithianon                                    | 2.84                         | 0.62                          | 2.22         |
| Anilazine                                    | 3.00                         | 5.20                          | -2.20        |
| Flupyrsulfuron-methyl                        | 1.30                         | 3.50                          | -2.20        |
| Diacetylmorphine                             | 1.59                         | 3.76                          | -2.17        |
| 2-Carboxypyridine                            | -1.98                        | 0.15                          | -2.13        |
| Cefatrizine                                  | -2.24                        | -0.15                         | -2.09        |
| Sulfamethizole                               | 0.54                         | 2.60                          | -2.06        |
| Benzo-1,2,3-triazole                         | 1.34                         | 3.40                          | -2.06        |
| 5-Ethyl-6-azauracil                          | 0.22                         | 2.24                          | -2.02        |
| 6-Azauridine                                 | -2.14                        | -4.15                         | 2.01         |
| p-Nonylphenyl diphenyl phosphate             | 5.90                         | 7.90                          | -2.00        |
| Cephalexin                                   | 0.65                         | -1.34                         | 1.99         |
| Bendiocarb                                   | 1.70                         | 3.69                          | -1.99        |
| 4-Pyrimidinol                                | -1.38                        | 0.60                          | -1.98        |
| Carbomycin                                   | 3.04                         | 1.06                          | 1.98         |
| 4-Amino-3-(methylthio)-1,2,4-triazin-5-one   | 0.38                         | -1.59                         | 1.97         |
| Tylosin                                      | 1.63                         | -0.34                         | 1.97         |
| Oryzalin                                     | 3.73                         | 1.83                          | 1.90         |
| Propiolactone                                | -1.36                        | 0.53                          | -1.89        |
| Spironolactone                               | 2.78                         | 4.66                          | -1.88        |
| 6-Acetylmorphine                             | 1.55                         | 3.40                          | -1.85        |
| beta-Butyrolactone                           | -0.84                        | 1.00                          | -1.84        |
| Hydromorphone                                | 0.90                         | 2.71                          | -1.81        |
| Pyrazin-2-one                                | -1.49                        | -3.29                         | 1.80         |
| Tazemetostat                                 | 2.82                         | 4.60                          | -1.78        |
| Cephalothin                                  | -0.20                        | 1.57                          | -1.77        |
| Molibresib                                   | 2.80                         | 4.55                          | -1.75        |
| Etorphine                                    | 2.79                         | 4.54                          | -1.75        |
| Verapamil                                    | 3.79                         | 5.54                          | -1.75        |
| 1-Hexadecyl-3-methylimidazolium bromide      | 10.42                        | 8.72                          | 1.70         |
| Doxorubicin                                  | 0.65                         | -1.03                         | 1.68         |
| 2-Aminobenzenethiol                          | 3.00                         | 1.32                          | 1.68         |
| 1-Ethyl-3-methylimidazolium trifluoroacetate | 1.95                         | 0.29                          | 1.66         |
| Cetylpyridinium chloride                     | 9.61                         | 7.95                          | 1.66         |
| Acetaldoxime                                 | -0.18                        | -1.83                         | 1.65         |
| Rubeanic acid                                | -0.44                        | -2.08                         | 1.64         |
| Profluralin                                  | 6.34                         | 4.71                          | 1.63         |
| 1-Pentadecanol                               | 7.11                         | 5.52                          | 1.59         |
| Pentazocine                                  | 3.31                         | 4.90                          | -1.59        |
| 1-Bromodecane                                | 6.43                         | 4.84                          | 1.59         |

|                                                                      |       |       |       |
|----------------------------------------------------------------------|-------|-------|-------|
| Dihydro-5-methyl-2(3H)-furanone                                      | -0.28 | 1.30  | -1.58 |
| 6-Aminonicotinamide                                                  | 0.70  | -0.86 | 1.56  |
| Codeine                                                              | 1.19  | 2.75  | -1.56 |
| Colchicine                                                           | 1.30  | 2.85  | -1.55 |
| Aldicarb                                                             | 1.13  | -0.42 | 1.55  |
| Uric acid                                                            | -1.11 | 0.44  | -1.55 |
| Morphine                                                             | 0.89  | 2.43  | -1.54 |
| Sulfadimethoxine                                                     | 1.63  | 3.13  | -1.50 |
| 5-Ethylidihydro-2(3H)-furanone                                       | 0.24  | 1.73  | -1.49 |
| 2-Amino-4-chlorothiophenol                                           | 3.33  | 1.85  | 1.48  |
| Valerolactone                                                        | -0.35 | 1.13  | -1.48 |
| Butyrolactone                                                        | -0.64 | 0.83  | -1.47 |
| Disopyramide                                                         | 2.37  | 3.84  | -1.47 |
| 4-Amino-1,2,4-triazole                                               | -1.38 | 0.08  | -1.46 |
| 7H-Benzimidazo(2,1-a)benzo(de)isoquinolin-7-one                      | 1.76  | 3.22  | -1.46 |
| 1-Tetradecanol                                                       | 6.54  | 5.09  | 1.45  |
| Enoxacin                                                             | 2.30  | 0.86  | 1.44  |
| O,O'-Dimethyl-O''-(benzothien-3-yl)glyoxylonitrile oximino phosphate | 0.76  | -0.67 | 1.43  |
| Propiconazole                                                        | 3.50  | 4.93  | -1.43 |
| Omeprazole                                                           | 2.23  | 0.82  | 1.41  |
| Tetracaine                                                           | 3.73  | 2.34  | 1.39  |
| Dihydro-3-methyl-2(3H)-furanone                                      | -0.28 | 1.11  | -1.39 |
| Terazosin                                                            | 2.29  | 0.90  | 1.39  |
| Phenprocoumon                                                        | 3.62  | 5.00  | -1.38 |
| Helenalin                                                            | 0.87  | 2.24  | -1.37 |
| Steroid09                                                            | 3.13  | 4.49  | -1.36 |
| 1,4-Dicyanobutane                                                    | -0.32 | 1.04  | -1.36 |
| 1-Hexadecyl-3-methylimidazolium chloride                             | 10.08 | 8.72  | 1.36  |
| Mirex                                                                | 5.28  | 6.62  | -1.34 |
| Cefadroxil                                                           | -0.40 | -1.74 | 1.34  |
| Telmisartan                                                          | 7.73  | 6.40  | 1.33  |
| Furosemide                                                           | 2.56  | 1.23  | 1.33  |
| 9-Carboxy-9,10-dihydroanthracene                                     | 2.67  | 4.00  | -1.33 |
| Glutaronitrile                                                       | -0.72 | 0.61  | -1.33 |
| 1-Tridecanol                                                         | 5.97  | 4.66  | 1.31  |
| Pentafluorophenol                                                    | 3.23  | 1.92  | 1.31  |
| 3-Hydroxypicolinamide                                                | 0.65  | -0.65 | 1.30  |
| Xamoterol                                                            | 0.61  | -0.69 | 1.30  |
| Vinylchloride                                                        | 2.79  | 1.50  | 1.29  |
| 4-Hydroxyquinoline                                                   | 0.58  | 1.87  | -1.29 |
| 5-Butyldihydro-2(3H)-furanone                                        | 1.30  | 2.59  | -1.29 |
| Dodecylbromide                                                       | 6.98  | 5.70  | 1.28  |
| Buprenorphine                                                        | 4.82  | 6.10  | -1.28 |
| Ouabain                                                              | -1.70 | -0.43 | -1.27 |
| Adipic dihydrazide                                                   | -2.88 | -1.62 | -1.26 |
| 3,4-Dimethoxythiophenol                                              | 3.32  | 2.06  | 1.26  |
| Acarin                                                               | 4.28  | 5.53  | -1.25 |
| 4-Nitromethylhippuric acid                                           | 0.98  | -0.27 | 1.25  |
| Buquinolate                                                          | 2.18  | 3.42  | -1.24 |
| Sulfapyridine                                                        | -0.02 | 1.21  | -1.23 |
| Dibenzoyl                                                            | 3.38  | 2.15  | 1.23  |
| Adenosine                                                            | -1.05 | -2.28 | 1.23  |
| Fluazuron                                                            | 5.10  | 6.32  | -1.22 |
| 1-Decanol                                                            | 4.57  | 3.37  | 1.20  |
| 4-Isothiocyanatodiphenylsulfoxide                                    | 4.40  | 3.20  | 1.20  |

|                                                                                          |       |               |       |
|------------------------------------------------------------------------------------------|-------|---------------|-------|
| n-Octadecanoic acid                                                                      | 8.23  | 7.04          | 1.19  |
| Imazalil                                                                                 | 3.82  | 2.63          | 1.19  |
| Mefruside                                                                                | 1.54  | 0.36          | 1.18  |
| Methohexital                                                                             | 2.80  | 1.64          | 1.16  |
| Chlorfenvinphos                                                                          | 3.10  | 4.26          | -1.16 |
| Primidone                                                                                | 0.91  | 2.06          | -1.15 |
| Probenecid                                                                               | 3.21  | 2.07          | 1.14  |
| O,O'-Diisopropyl-O''-(2-methoxycarbonylbenzofuran-3-yl)glyoxylonitrile oximino phosphate | 1.36  | 0.23          | 1.13  |
| Cefotaxime                                                                               | -1.36 | -0.26         | -1.10 |
| Didanosine                                                                               | -1.24 | -0.16         | -1.08 |
| Doxycycline                                                                              | 0.42  | -0.62         | 1.04  |
| 2,5-Dibromo-3,4-hexanedione                                                              | 0.20  | 1.24          | -1.04 |
| Tilmicosin                                                                               | 3.80  | 2.85          | 0.95  |
| Phosphoric acid                                                                          | -0.77 | not evaluable |       |
| Sorbose-6-phosphate                                                                      | 0.38  | not evaluable |       |
| Tetrabutyl silicate                                                                      | 5.61  | not evaluable |       |
| Cytidine monophosphate                                                                   | 0.44  | not evaluable |       |
