# Supplementary material
Source: MDPI journal article supplement (https://www.mdpi.com/2673-8015/4/1/11)
Supplement: s1 [file s1]

**Outliers of logKaw**

| <b>Name</b>               | <b>logKaw exp</b> | <b>logKaw calc</b> | <b>Diff</b> |
|---------------------------|-------------------|--------------------|-------------|
| Metosulam                 | -15.50            | -6.41              | -9.09       |
| Flurtamone                | -11.59            | -4.94              | -6.65       |
| Tris-BP                   | -2.97             | -8.64              | 5.67        |
| Flumetsulam               | -14.56            | -9.13              | -5.43       |
| Pyrifthalid               | -8.80             | -4.60              | -4.20       |
| Phenazopyridine           | -11.37            | -7.22              | -4.15       |
| Fluazifop                 | -10.93            | -6.89              | -4.04       |
| Gibberellic acid          | -10.53            | -14.55             | 4.02        |
| profluralin               | -1.92             | -5.89              | 3.97        |
| Nitralin                  | -6.18             | -9.95              | 3.77        |
| Thiazafurion              | -7.63             | -3.96              | -3.67       |
| 3-Amino-1H-1,2,4-triazole | -9.60             | -5.98              | -3.62       |
| fluazinam                 | -2.91             | -6.52              | 3.61        |
| flumetralin               | -2.75             | -6.28              | 3.53        |
| Acetoacetanilide          | -8.94             | -5.45              | -3.49       |
| benefin                   | -2.04             | -5.22              | 3.18        |
| Triapenthenol             | -8.00             | -4.91              | -3.09       |
| Methomyl                  | -9.07             | -5.99              | -3.08       |
| AKD2023                   | -4.45             | -7.49              | 3.04        |
| Isoxaflutole              | -7.70             | -10.74             | 3.04        |
| Ferimzone                 | -8.25             | -5.23              | -3.02       |
| fluchloralin              | -2.94             | -5.95              | 3.01        |
| Butanedinitrile           | -6.58             | -3.57              | -3.01       |
| 2,4-Pentanediol           | -6.97             | -3.99              | -2.98       |
| trifluralin               | -2.25             | -5.22              | 2.97        |
| Quinizarin                | -5.49             | -8.44              | 2.95        |
| ethalfuralin              | -2.28             | -5.22              | 2.94        |
| Metaldehyde               | -2.68             | -5.58              | 2.90        |
| isopropalin               | -2.83             | -5.72              | 2.89        |
| Cymoxanil                 | -7.47             | -10.33             | 2.86        |
| Quizalofop-P-ethyl        | -7.08             | -9.91              | 2.83        |
| Isoxaben                  | -6.85             | -4.09              | -2.76       |
| prodiamine                | -3.50             | -6.26              | 2.76        |
| Butoxycarboxim            | -9.67             | -12.41             | 2.74        |
| Diisodecylphthalate       | -2.14             | -4.87              | 2.73        |
| 1,4-Dicyanobutane         | -6.30             | -3.60              | -2.70       |
| Chlorpromazine            | -8.21             | -5.52              | -2.69       |
| Glyoxal                   | -6.87             | -4.18              | -2.69       |
| fenclozim                 | -3.14             | -5.81              | 2.67        |
| 2-hydroxypropyl laurate   | -2.37             | -5.03              | 2.66        |
| Musk xylene               | -2.90             | -5.55              | 2.65        |
| Acariflor                 | -6.05             | -8.70              | 2.65        |
| Bensulfuron-methyl        | -12.04            | -14.65             | 2.61        |
| Bromuconazole             | -8.20             | -5.63              | -2.57       |
| Azoxystrobin              | -11.01            | -8.51              | -2.50       |
| lprodione                 | -8.00             | -10.50             | 2.50        |
| Halauxifene               | -8.94             | -11.44             | 2.50        |
| TCEP                      | -3.87             | -6.36              | 2.49        |
| 4-CPA                     | -8.41             | -5.93              | -2.48       |
| phosmet                   | -5.87             | -8.34              | 2.47        |
| Benzylaminopurine         | -11.15            | -8.69              | -2.46       |
| Ethychlozate              | -7.60             | -5.15              | -2.45       |
| Fenoxanil                 | -10.09            | -7.65              | -2.44       |

|                                |        |        |       |
|--------------------------------|--------|--------|-------|
| Desmetryn                      | -7.38  | -9.81  | 2.43  |
| Dichlorophen                   | -10.33 | -7.92  | -2.41 |
| Diclofop                       | -9.36  | -6.95  | -2.41 |
| Picric acid                    | -8.87  | -6.46  | -2.41 |
| Diphacinone                    | -8.20  | -10.59 | 2.39  |
| Bis(2-ethylhexyl)terephthalate | -2.67  | -5.04  | 2.37  |
| Ethirimol                      | -6.86  | -9.20  | 2.34  |
| Tolprocarb                     | -8.21  | -10.53 | 2.32  |
| Diclobutrazol                  | -7.38  | -5.10  | -2.28 |
| decachlorodiphenylether        | -0.75  | -3.01  | 2.26  |
| Benazolin                      | -10.02 | -7.77  | -2.25 |
| Dithianon                      | -9.07  | -11.30 | 2.23  |
| tebupirimfos                   | -3.73  | -5.96  | 2.23  |
| Tralopyril                     | -7.05  | -4.83  | -2.22 |
| Benzo-1,2,3-triazole           | -4.72  | -2.51  | -2.21 |
| N-nitroso-N-methylurethane     | -3.30  | -1.09  | -2.21 |
| 4-Nitrophenol                  | -7.58  | -5.38  | -2.20 |
| fenpyroximate                  | -4.26  | -6.46  | 2.20  |
| Metazachlor                    | -7.25  | -5.07  | -2.18 |
| Malonic acid                   | -10.16 | -7.99  | -2.17 |
| Hydroquinone                   | -8.72  | -6.57  | -2.15 |
| Phenacetin                     | -8.13  | -6.00  | -2.13 |
| emylcamate                     | -2.86  | -4.99  | 2.13  |
| propylene carbonate            | -5.54  | -3.41  | -2.13 |
| cymiazole                      | -5.57  | -3.45  | -2.12 |
| Propylenecarbonate             | -5.54  | -3.42  | -2.12 |
| 1,1,1-trifluoroacetone         | -3.50  | -1.39  | -2.11 |
| Tribenuron-methyl              | -9.89  | -11.99 | 2.10  |
| Diphenamid                     | -8.81  | -6.71  | -2.10 |
| fluoroacetic acid              | -6.30  | -4.21  | -2.09 |
| Acetylsalicylic acid           | -7.28  | -5.20  | -2.08 |
| Haloxypop-etotyl               | -7.97  | -5.90  | -2.07 |
| 8-Hydroxyquinoline             | -4.70  | -6.75  | 2.05  |
| Coumatetralyl                  | -10.19 | -8.14  | -2.05 |
| Tetrachlorocatechol            | -4.85  | -6.87  | 2.02  |
| Fenpropathrin                  | -3.50  | -5.51  | 2.01  |
